# Supplementary material for: Novel Siphoviridae Bacteriophages Infecting Bacteroides uniformis Contain Diversity Generating Retroelement
Source: Microorganisms. 2021 Apr 21;9(5):892. doi: 10.3390/microorganisms9050892 (PMC8143477; doi:10.3390/microorganisms9050892)
Supplement: Supplementary file 1 [file microorganisms-09-00892-s001.zip]

Archive with 10 entries (10 files):
- Data sheet S1_ Putative functions of ORFs in prophages.xlsx
- Data sheet S2 Abundance of reads aligning to Bacuni F1 in gut metagenomes.xlsx
- Figure S1_Schematic overview of lysogenic assay.pdf
- Figure S2_Vcontact clusters.pptx
- Figure S3_Virfam server generated identification.pdf
- Figure S4_Phylogenetic analysis of TerL.pdf
- Table S1_List of Bacteroides strains.xlsx
- Table S2 vcontact2 results.xls
- Table S3_Functional annotation of Bacuni ORFs.xlsx
- Table S4 Genetic differences in genes of Bacuni host derivatives.xlsx
