# Supplementary material for: Novel Siphoviridae Bacteriophages Infecting Bacteroides uniformis Contain Diversity Generating Retroelement
Source: Microorganisms. 2021 Apr 21;9(5):892. doi: 10.3390/microorganisms9050892 (PMC8143477; doi:10.3390/microorganisms9050892)
Supplement: Supplementary file 1 [file microorganisms-09-00892-s001.zip › Data sheet S1_ Putative functions of ORFs in prophages.xlsx]

## Sheet: B. acidifaciens NM70_E10_propha
ORF No.	Putative function (CDD)	Closest BLAST hit description (BLASTp)	E-value (BLASTp)	Genebank accession
ORF 1	Hypothetical protein	hypothetical protein	0.0	WP_136013766.1
ORF 2	Hypothetical protein	hypothetical protein	0.0	WP_136013767.1
ORF 3	Hypothetical protein	hypothetical protein	0.0	WP_136013768.1
ORF 4	Hypothetical protein	hypothetical protein	0.0	WP_136013769.1
ORF 5	Hypothetical protein	hypothetical protein	0.0	WP_136013770.1
ORF 6	Hypothetical protein	hypothetical protein	0.0	WP_136013771.1
ORF 7	Hypothetical protein	hypothetical protein	0.0	WP_118496980.1
ORF 8	Hypothetical protein	hypothetical protein	0.0	WP_136013772.1
ORF 9	Hypothetical protein	hypothetical protein	0.0	WP_008768566.1
ORF 10	Reverse transcriptase	reverse transcriptase	0.0	WP_136013773.1
ORF 11	Avd_IVP_like super family	DGR acessory protein	0.0	WP_136013774.1
ORF 12	Target region DGR	DUF1566 domain-containing protein	0.0	WP_008768568.1
ORF 13	Hypotetical protein	hypothetical protein [Bacteroides acidifaciens]	2e-104	WP_136013775.1
ORF 14	Lysis cycle regulator	hypothetical protein [Bacteroides acidifaciens]	5e-103	WP_136013776.1
ORF 15	MerR family transcriptional regulator	MerR family transcriptional regulator [Bacteroides acidifaciens]	2e-41	WP_136013777.1
ORF 16	Hypothetical protein	hypothetical protein [Bacteroides acidifaciens]	2e-48	WP_136013778.1
ORF 17	DUF3086 super family	hypothetical protein [Bacteroides acidifaciens]	1e-126	WP_136013779.1
ORF 18	DUF2800 /Cas4 domain-containing protein	DUF2800 domain-containing protein [Bacteroides acidifaciens]	0.0	WP_136013780.1
ORF 19	Hypothetical protein	/
ORF 20	DUF2815 domain-containing protein	DUF2815 family protein [Bacteroides acidifaciens]	2e-135	WP_136013781.1
ORF 21	DNA_pol_A super family	hypothetical protein [Bacteroides acidifaciens]	0.0	WP_136013782.1
ORF 22	Hypotetical protein	hypothetical protein [Bacteroides acidifaciens]	6e-76	WP_136013783.1
ORF 23	Hypothetical protein	adenine methyltransferase [Bacteroides acidifaciens]	1e-100	WP_136013784.1
ORF 24	DUF3310 superfamily domain-containing protein/ 70% coverage/34% identity with DUF 1566 of F1	DUF3310 domain-containing protein [Bacteroides acidifaciens]	0.0	WP_136013785.1
ORF 25	Hydrolase – AANH_like super family	hypothetical protein [Bacteroides acidifaciens]	1e-72	WP_136013786.1
ORF 26	PRK13795 super family	hypothetical protein [Bacteroides acidifaciens]	2e-94	WP_136013787.1
ORF 27	Hypothetical protein	hypothetical protein A2246_06770 [candidate division WOR-1 bacterium RIFOXYA2_FULL_37_7]	7.1	WP_136013788.1
ORF 28	Virulence-associated protein E	hypothetical protein [Bacteroides acidifaciens]	0.0	WP_136013789.1
ORF 29	VRR-NUC domain-containing protein	VRR-NUC domain-containing protein [Bacteroides acidifaciens]	4e-72	WP_136013790.1
ORF 30	DEAD/DEAH box helicase	DEAD/DEAH box helicase [Bacteroides acidifaciens]	0.0	WP_136013813.1
ORF 31	Hypotetical protein	hypothetical protein [Bacteroides acidifaciens]	2e-61	WP_136013791.1
ORF 32	HNH endonuclease	HNH endonuclease [Bacteroides acidifaciens]	2e-78	WP_136013792.1
ORF 33	Terminase small subunit	P27 family phage terminase small subunit [Bacteroides acidifaciens]	2e-85	WP_136013793.1
ORF 34	Hypothetical protein	hypothetical protein [Bacteroides acidifaciens]	3e-76	WP_136013794.1
ORF 35	Terminase large subunit	terminase large subunit [Bacteroides acidifaciens]	0.0	WP_136013795.1
ORF 36	phage portal protein	phage portal protein [Bacteroides acidifaciens]	0.0	WP_136013796.1
ORF 37	HK97 family phage prohead protease	HK97 family phage prohead protease [Bacteroides acidifaciens]	8e-171	WP_136013797.1
ORF 38	phage major capsid protein	phage major capsid protein [Bacteroides acidifaciens]	0.0	WP_136013798.1
ORF 39	phage gp6-like head-tail connector protein	phage gp6-like head-tail connector protein [Bacteroides acidifaciens]	1e-68	WP_136013799.1
ORF 40	Phage head-tail joining protei	head-tail adaptor protein [Bacteroides acidifaciens]	4e-73	WP_136013800.1
ORF 41	Hypotetical protein	hypothetical protein [Bacteroides acidifaciens]	1e-122	WP_136013801.1
ORF 42	Protein of unknown function (DUF3168)	DUF3168 domain-containing protein [Bacteroides acidifaciens]	2e-88	WP_136013802.1
ORF 43	Lambda phage tail tube protei	hypothetical protein [Bacteroides acidifaciens]	8e-112	WP_136013803.1
ORF 44	Hypotetical protein	hypothetical protein [Bacteroides acidifaciens]	2e-68	WP_136013804.1
ORF 45	Hypotetical protein	hypothetical protein [Bacteroides acidifaciens]	8e-67	WP_136013805.1
ORF 46	Phage tail tape meassure protein	hypothetical protein [Bacteroides acidifaciens]	0.0	WP_136013806.1
ORF 47	Hypotetical protein	hypothetical protein [Bacteroides acidifaciens]	0.0	WP_136013807.1
ORF 48	Hypothetical protein	hypothetical protein [Bacteroides acidifaciens]	0.0	WP_136013808.1

## Sheet: Prevotella sp. P3-122_prophage
ORF No.(contig 46)	Putative function (CDD)	Closest BLAST hit description (BLASTp)	E-value (BLASTp)	Genebank accession
ORF 1	transcriptional regulator, Lacl/PurR family	LacI family transcriptional regulator [Prevotella sp. P3-122]	0.0	WP_094400949.1
ORF 2	phage integrases	hypothetical protein [Prevotella sp. P3-122]	0.0	WP_094400951.1
ORF 3	hypothetical protein	hypothetical protein [Prevotella sp. P3-122]	5e-121	WP_094400953.1
ORF 4	Peptidoglycan domain protein, ZliS super family, lysozyme family protein	peptidoglycan domain protein [Prevotella sp. P3-122]	4e-138	WP_094400955.1
ORF 5	hypothetical protein	hypothetical protein [Prevotella sp. P3-122]	7e-77	WP_094400957.1
ORF 6	RT_Bac_retron_I, DNA polymerase	RNA-directed DNA polymerase [Prevotella sp. P3-122]	0.0	WP_094400959.1
ORF 7	Avd_like, diversity generating retroelement protein bAvd DGR	four helix bundle protein [Prevotella sp. P3-122]	3e-93	WP_094400961.1
ORF 8	DUF1566	DUF1566 domain-containing protein [Prevotella sp. P3-122]	0.0	WP_094400963.1
ORF 9	hypothetical protein	hypothetical protein CIL02_08725 [Prevotella sp. P3-122]	0.0	OYP60384.1 , WP_141210179.1
ORF 10	hypothetical protein	hypothetical protein CIL02_08730 [Prevotella sp. P3-122]	1e-37	OYP60385.1
ORF 11	hypothetical protein	hypothetical protein [Prevotella sp. P3-122]	0.0	WP_094400969.1
ORF 12	hypothetical protein	hypothetical protein [Prevotella sp. P3-122]	6e-107	WP_094400971.1
ORF 13	hypothetical protein	hypothetical protein [Prevotella sp. P3-122]	0.0	WP_141210180.1 , OYP60388.1
ORF 14	hypothetical protein	hypothetical protein [Prevotella sp. P3-122]	0.0	WP_094400975.1
ORF 15	hypothetical protein	hypothetical protein [Prevotella sp. P3-122]	0.0	WP_141210181.1 , OYP60390.1
ORF 16	phage tail tape measure protein, PhageMin_Tail: Phage-related minor tail portein	phage tail tape measure protein [Prevotella sp. P3-122]	0.0	WP_094400979.1
ORF 17	hypothetical protein	hypothetical protein CIL02_08765 [Prevotella sp. P3-122]	5e-68	OYP60392.1 , WP_141210182.1
ORF 18	hypothetical protein	hypothetical protein [Prevotella sp. P3-122]	2e-73	WP_141210183.1
ORF 19	phage tail tube protein	hypothetical protein [Prevotella sp. P3-122]	6e-107	WP_094400985.1
ORF 20	hypothetical protein	DUF3168 domain-containing protein [Prevotella sp. P3-122]	2e-85	WP_094400987.1
ORF 21	hypothetical protein	hypothetical protein [Prevotella sp. P3-122]	3e-128	WP_094400989.1
ORF 22	head-tail adaptor protein	hypothetical protein [Prevotella sp. P3-122]	7e-74	WP_094400991.1
ORF 23	ead-tail connector protein gp6 of bacteriophage HK97	phage gp6-like head-tail connector protein [Prevotella sp. P3-122]	3e-70	WP_094400993.1
ORF 24	phage major capsid protein	phage major capsid protein [Prevotella sp. P3-122]	0.0	WP_094400995.1
ORF 25	HK97 family prohead protease	hypothetical protein [Prevotella sp. P3-122]	3e-175	WP_094400997.1
ORF 26	phage portal protein	phage portal protein [Prevotella sp. P3-122]	0.0	WP_094400999.1
ORF 27	Terminase large subunit	terminase large subunit [Prevotella sp. P3-122]	0.0	WP_094401001.1
ORF 28	hypothetical protein	hypothetical protein [Prevotella sp. P3-122]	0.0	WP_094401003.1
ORF 29	hypothetical protein	hypothetical protein [Prevotella sp. P3-122]	8e-173	WP_094401005.1
ORF 30	HNH nucleases	HNH endonuclease [Prevotella sp. P3-122]	3e-82	WP_094401007.1
ORF 31	DEAD/DEAH box helicase	DEAD/DEAH box helicase [Prevotella sp. P3-122]	0.0	WP_094401009.1
ORF 32	VRR-NUC domain protein	VRR-NUC domain-containing protein [Prevotella sp. P3-122]	1e-69	WP_094401011.1
ORF 33	VirE super family	hypothetical protein [Prevotella sp. P3-122]	0.0	WP_094401013.1
ORF 34	Catalytic NodB homology domain of the carbohydrate esterase 4 superfamily	hypothetical protein [Prevotella sp. P3-122]	8e-37	WP_094401015.1
ORF 35	hypothetical protein	hypothetical protein CIL02_08855 [Prevotella sp. P3-122]	1e-39	OYP60410.1
ORF No. (contig 76)	Product name	Closest blast hit description (BLASTp)	E value	NCBI Accession
ORF1	DNA cytosine methylase	hypothetical protein [Prevotella sp. P3-122]	0.0	WP_094401782.1
ORF2	hypothetical protein	hypothetical protein [Prevotella sp. P3-122]	4e-63	WP_094401784.1
ORF3	DUF1566 domain-containing protein	DUF1566 domain-containing protein [Prevotella sp. P3-122]	2e-171	WP_094401785.1
ORF4	DNA pol A pol I A	hypothetical protein [Prevotella sp. P3-122]	0.0	WP_094401787.1
ORF5	DUF2815 family protein, Phage related protein with unknown function	DUF2815 family protein [Prevotella sp. P3-122]	9e-142	WP_094401789.1
ORF6	DUF2800 domain-containing protein	DUF2800 domain-containing protein [Prevotella sp. P3-122]	0.0	WP_094401791.1
ORF7	DUF2497 domain-containing protein	hypothetical protein CIL02_11300 [Prevotella sp. P3-122]	5e-09	OYP59257.1
ORF8	Helix-turn-helix domain-containing protein. DNA binding domain HTH_17	helix-turn-helix domain-containing protein [Prevotella sp. P3-122]	3e-42	WP_094401795.1
ORF9	hypothetical protein	hypothetical protein [Prevotella sp. P3-122]	3e-40	WP_094401797.1
ORF10	hypothetical protein	hypothetical protein [Prevotella sp. P3-122]	1e-43	WP_094401799.1
ORF11	hypothetical protein	hypothetical protein [Prevotella sp. P3-122]	4e-142	WP_094401801.1
ORF12	metallo-hydrolase-like_MBL-fold super family	hypothetical protein [Prevotella sp. P3-122]	0.0	WP_094401803.1
ORF13	hypothetical protein	hypothetical protein [Prevotella sp. P3-122]	1e-173	WP_094401804.1
ORF14	hypothetical protein	hypothetical protein [Prevotella sp. P3-122]	2e-113	WP_094401806.1
ORF15	hypothetical protein	hypothetical protein CIL02_11340 [Prevotella sp. P3-122]	3e-45	OYP59265.1 , WP_141210220.1

## Sheet: Prevotella sp. OH937_COT-195
ORF No.	Putative function (CDD)	Closest BLAST hit description (BLASTp)	E-value (BLASTp)	Genebank accession
ORF1	Hypotetical protein	hypothetical protein [Prevotella sp. OH937_COT-195]	0.0	WP_125234989.1
ORF2	Hypotetical protein	hypothetical protein [Prevotella sp. OH937_COT-195]	1e-46	WP_125234990.1
ORF3	Hypotetical protein	hypothetical protein [Prevotella sp. OH937_COT-195]	4e-69	WP_125234992.1
ORF4	Lambda phage tail tube protein, TTP;	hypothetical protein [Prevotella sp. OH937_COT-195]	2e-104	WP_125234993.1
ORF5	DUF3168 protein domain	DUF3168 domain-containing protein [Prevotella sp. OH937_COT-195]	5e-92	WP_125234994.1
ORF6	Hypotetical protein	hypothetical protein [Prevotella sp. OH937_COT-195]	1e-121	WP_125234995.1
ORF7	Hypotetical protein	hypothetical protein [Prevotella sp. OH937_COT-195]	4e-70	WP_125234996.1
ORF8	phage gp6-like head-tail connector protein	phage gp6-like head-tail connector protein [Prevotella sp. OH937_COT-195]	3e-69	WP_125234997.1
ORF9	Phage capsid protein	hypothetical protein [Prevotella sp. OH937_COT-195]	0.0	WP_125234998.1
ORF10	HK97 prohead protease	HK97 family phage prohead protease [Prevotella sp. OH937_COT-195]	1e-166	WP_125234999.1
ORF11	Phage portal protein	phage portal protein [Prevotella sp. OH937_COT-195]	0.0	WP_125235000.1
ORF12	Helix-Turn-Helix DNA binding domain of transcription regulators	hypothetical protein [Prevotella sp. OH937_COT-195]	2e-40	WP_125235001.1
ORF13	Hypotetical protein	hypothetical protein [Prevotella sp. OH937_COT-195]	2e-53	WP_125235002.1
ORF14	Hypotetical protein	hypothetical protein [Prevotella sp. OH937_COT-195]	3e-44	WP_125235003.1
ORF15	Phage regulatory protein Rha	Rha family transcriptional regulator [Prevotella sp. OH937_COT-195]	0.0	WP_125235004.1
ORF16	DNA pol III	DNA polymerase III [Prevotella sp. OH937_COT-195]	0.0	WP_125235005.1
ORF17	DNA polymerase III subunit epsilon	hypothetical protein [Prevotella sp. OH937_COT-195]	1e-99	WP_125235006.1
ORF18	Hypotetical protein	hypothetical protein [Prevotella sp. OH937_COT-195]	5e-66	WP_125235007.1
ORF19	Hypotetical protein	hypothetical protein [Prevotella sp. OH937_COT-195]	3e-52	WP_125235008.1
ORF20	Phage terminase-like protein, large subunit,	terminase large subunit [Prevotella sp. OH937_COT-195]	0.0	WP_125235009.1
ORF21	chromosome partitioning protein ParB	chromosome partitioning protein ParB [Prevotella sp. OH937_COT-195]	0.0	WP_125235010.1
ORF22	Helix-turn-helix of insertion element transposase	hypothetical protein [Prevotella sp. OH937_COT-195]	2e-175	WP_125235011.1
ORF23	Hypotetical protein	hypothetical protein [Prevotella sp. OH937_COT-195]	0.0	WP_125235012.1
ORF24	HNH endonuclease	HNH endonuclease [Prevotella sp. OH937_COT-195]	3e-76	WP_125235013.1
ORF25	DEAD/DEAH box helicase	DEAD/DEAH box helicase [Prevotella sp. OH937_COT-195]	0.0	WP_125235014.1
ORF26	VRR-NUC	VRR-NUC domain-containing protein [Prevotella sp. P3-122]	1e-36	WP_094401011.1
ORF27	Hypotetical protein	hypothetical protein R2APBS1_1896 [Rhodanobacter denitrificans]	43590	AGG89020.1
ORF28	VirE	hypothetical protein [Prevotella sp. OH937_COT-195]	0.0	WP_125235015.1
ORF29	Hypotetical protein	hypothetical protein [Prevotella sp. OH937_COT-195]	5e-44	WP_125235016.1
ORF30	Hypotetical protein	hypothetical protein [Prevotella sp. OH937_COT-195]	4e-157	WP_125235017.1
ORF31	S-adenosylmethionine-dependent methyltransferases	hypothetical protein [Prevotella sp. OH937_COT-195]	0.0	WP_125235018.1
ORF32	3'-phosphoadenosine 5'-phosphosulfate sulfotransferase	phosphoadenosine phosphosulfate reductase [Prevotella sp. OH937_COT-195]	0.0	WP_125235019.1
ORF33	The beta subunit (processivity factor) of DNA polymerase III holoenzyme,	DNA polymerase III subunit beta [Prevotella sp. OH937_COT-195]	0.0	WP_125235020.1
ORF34	Hypotetical protein	PREDICTED: uncharacterized protein LOC105110073 isoform X1 [Populus euphratica]	43562	XP_011003283.1
ORF35	Hypotetical protein	hypothetical protein [Prevotella sp. OH937_COT-195]	4e-60	WP_125235022.1
ORF36	Protein of unknown function (DUF1566)	hypothetical protein [Prevotella sp. OH937_COT-195]	1e-171	WP_125235023.1
ORF37	Hypotetical protein	No significant similarity found.
ORF38	Hypotetical protein	No significant similarity found.
ORF39	DNA_pol_A super family	hypothetical protein [Prevotella sp. OH937_COT-195]	0.0	WP_125235024.1
ORF40	DUF2815	DUF2815 family protein [Prevotella sp. OH937_COT-195]	2e-132	WP_125235025.1
ORF41	Hypotetical protein	hypothetical protein HMPREF2531_05316 [Bacteroides intestinalis]	3e-06	KXT40540.1
ORF42	DUF2800	DUF2800 domain-containing protein [Prevotella sp. OH937_COT-195]	0.0	WP_125235026.1
ORF43	50S ribosomal protein L21/	hypothetical protein [Prevotella sp. OH937_COT-195]	4e-119	WP_125235027.1
ORF44	Hypotetical protein	No significant similarity found.
ORF45	Predicted site-specific integrase-resolvase	hypothetical protein [Prevotella sp. OH937_COT-195]	5e-43	WP_125235028.1
ORF46	Hypotetical protein	hypothetical protein [Prevotella sp. OH937_COT-195]	1e-41	WP_125235029.1
ORF47	Hypotetical protein	hypothetical protein [Prevotella sp. OH937_COT-195]	5e-87	WP_125235030.1

## Sheet: P. gingivicanis COT-022 OH1391
ORF No.	Putative function (CDD)	Closest BLAST hit description (BLASTp)	E-value (BLASTp)	Genebank accession
ORF 1	Site-specific integrase	site-specific integrase [Porphyromonas gingivicanis]	0.0	WP_036883078.1
ORF 2	hypothetical protein	hypothetical protein [Porphyromonas gingivicanis]	5e-143	WP_025843015.1
ORF 3	hypothetical protein	hypothetical protein [Porphyromonas gingivicanis]	0.0	WP_036883080.1
ORF 4	hypothetical protein	hypothetical protein [Porphyromonas gingivicanis]	4e-87	WP_036883082.1
ORF 5	hypothetical protein	hypothetical protein [Porphyromonas gingivicanis]	9e-77	WP_025843018.1
ORF 6	COG2932: Phage repressor protein C, contains Cro/C1-type HTH and peptidase s24 domains	hypothetical protein [Porphyromonas gingivicanis]	0.0	WP_081962168.1
ORF 7	hypothetical protein	hypothetical protein [Porphyromonas gingivicanis]	1e-37	WP_036883086.1
ORF 8	Phage regulatory protein Rha, Phage antirepressor protein KilAC domain	hypothetical protein [Porphyromonas gingivicanis]	0.0	WP_052102435.1
ORF 9	Helix-turn-helix domain-containing protein	helix-turn-helix domain-containing protein [Porphyromonas gingivicanis]	3e-65	WP_036883215.1
ORF 10	hypothetical protein	DEAD/DEAH box helicase [Porphyromonas gingivicanis]	0.0	WP_036883098.1
ORF 11	DUF2800 domain-containing protein, Superfamily: CRISPR/Cas system-associated protein Cas4	DUF2800 domain-containing protein [Porphyromonas gingivicanis]	0.0	WP_036883090.1
ORF 12	DUF2815 family protein	DUF2815 family protein [Porphyromonas gingivicanis]	2e-135	WP_036883092.1
ORF 13	DNA_pol_A super family	hypothetical protein [Porphyromonas gingivicanis]	0.0	WP_036883094.1
ORF 14	hypothetical protein
ORF 15	VRR-NUC domain-containing protein	VRR-NUC domain-containing protein [Porphyromonas gingivicanis]	5e-72	WP_052102438.1
ORF 16	DEAD/DEAH box helicase	DEAD/DEAH box helicase [Porphyromonas gingivicanis]	0.0	WP_036883098.1
ORF 17	hypothetical protein	hypothetical protein [Porphyromonas gingivicanis]	2e-131	WP_036883099.1
ORF 18	HNH endonuclease	HNH endonuclease [Porphyromonas gingivicanis]	1e-77	WP_025843032.1
ORF 19	hypothetical protein	hypothetical protein [Porphyromonas gingivicanis]	2e-36	WP_036883101.1, KGN98424.1
ORF 20	hypothetical protein	hypothetical protein [Porphyromonas gingivicanis]	2e-82	WP_036883103.1
ORF 21	terminase large subunit	terminase large subunit [Porphyromonas gingivicanis]	0.0	WP_036883106.1
ORF 22	phage portal protein	phage portal protein [Porphyromonas gingivicanis]	0.0	WP_052102441.1
ORF 23	HK97 family phage prohead protease	HK97 family phage prohead protease [Porphyromonas gingivicanis]	3e-151	WP_036883108.1
ORF 24	phage major capsid protein	phage major capsid protein [Porphyromonas gingivicanis]	0.0	WP_036883110.1
ORF 25	phage gp6-like head-tail connector protein	phage gp6-like head-tail connector protein [Porphyromonas gingivicanis]	6e-65	WP_052102444.1
ORF 26	head-tail adaptor protein	head-tail adaptor protein [Porphyromonas gingivicanis]	3e-73	WP_025843039.1
ORF 27	hypothetical protein	hypothetical protein [Porphyromonas gingivicanis]	3e-106	WP_025843040.1
ORF 28	DUF3168 domain-containing protein	DUF3168 domain-containing protein [Porphyromonas gingivicanis]	7e-91	WP_036883114.1
ORF 29	phage tail tube protein	hypothetical protein [Porphyromonas gingivicanis]	1e-118	WP_025843042.1
ORF 30	integration host factor (IHF) and HU, also called type II DNA-binding proteins (DNABII)	hypothetical protein [Porphyromonas gingivicanis]	5e-110	WP_025843043.1
ORF 31	hypothetical protein	hypothetical protein [Porphyromonas gingivicanis]	5e-140	WP_036883117.1
ORF 32	tape measure protein	tape measure protein [Porphyromonas gingivicanis]	0.0	WP_036883119.1
ORF 33	hypothetical protein	hypothetical protein [Porphyromonas gingivicanis]	0.0	WP_036883121.1
ORF 34	hypothetical protein	hypothetical protein [Porphyromonas gingivicanis]	3e-110	WP_025843049.1
ORF 35	peptidoglycan domain protein (lysocim): N-acetylmuramidase_GH108. PG_binding_3 super family	peptidoglycan domain protein [Porphyromonas gingivicanis]	2e-120	WP_036883123.1
ORF 36	hypothetical protein	hypothetical protein [Porphyromonas gingivicanis]	6e-125	WP_036883125.1
ORF 37	DUF5053 domain-containing protein	DUF5053 domain-containing protein [Porphyromonas gingivicanis]	2e-54	WP_036883127.1
ORF 38	helix-turn-helix domain-containing protein	helix-turn-helix domain-containing protein [Porphyromonas gingivicanis]	0.0	WP_036883129.1
ORF 39	site-specific integrase	MULTISPECIES: site-specific integrase [Porphyromonas]	0.0	WP_036883131.1

## Sheet: P. cangingivalis JCM 15983_prop
ORF No.	Putative function (CDD)	Closest BLAST hit description (BLASTp)	E-value (BLASTp)	Genebank accession
ORF 1	Phage repressor protein C, Helix-turn-helix XRE-family like proteins	hypothetical protein [Porphyromonas cangingivalis]	1e-175	WP_025839119.1
ORF 2	hypothetical protein	hypothetical protein [Porphyromonas cangingivalis]	5e-89	WP_025839120.1
ORF 3	Phage antirepressor protein KilAC domain (ANT in KilA-N)	hypothetical protein [Porphyromonas cangingivalis]	2e-67	WP_025839121.1
ORF 4	Two-component response regulator, COG4567 super family	hypothetical protein [Porphyromonas cangingivalis]	6e-48	WP_025839122.1
ORF 5	hypothetical protein	hypothetical protein [Porphyromonas cangingivalis]	5e-36	WP_036853980.1
ORF 6	hypothetical protein	hypothetical protein [Porphyromonas cangingivalis]	1e-61	WP_025839124.1
		hypothetical protein [Porphyromonas cangingivalis]	2e-58	WP_078735627.1
ORF 7	AAA super family - ATPases associated with a variety of cellular activitie	hypothetical protein [Porphyromonas cangingivalis]	2e-163	WP_078735628.1
		DNA replication protein [Porphyromonas cangingivalis]	2e-144	VEJ02625.1
	DNA replication protein DnaC	DNA replication protein DnaC [Porphyromonas cangingivalis]	7e-100	SJZ42512.1
ORF 8	hypothetical protein	hypothetical protein [Porphyromonas cangingivalis]	1e-103	WP_025839128.1
ORF 9	PcfK-like protein	hypothetical protein [Porphyromonas cangingivalis]	1e-81	WP_025839130.1
ORF 10	hypothetical protein
ORF 11	PcfJ-like protein	hypothetical protein [Porphyromonas cangingivalis]	0.0	WP_081775627.1
	PcfJ-like protein	hypothetical protein [Porphyromonas cangingivalis]	0.0	WP_078735629.1
ORF 12	hypothetical protein	hypothetical protein [Porphyromonas cangingivalis]	1e-138	WP_025839136.1
		hypothetical protein SAMN02745205_00758 [Porphyromonas cangingivalis]	3e-134	SJZ42569.1
ORF 13	DUF3127 domain-containing protein (may have a DNA-binding function)	DUF3127 domain-containing protein [Porphyromonas cangingivalis]	3e-60	WP_025839139.1
ORF 14	hypothetical protein	hypothetical protein [Porphyromonas cangingivalis]	1e-143	WP_036853983.1
		hypothetical protein [Porphyromonas cangingivalis]	3e-138	WP_025839141.1
ORF 15	hypothetical protein	hypothetical protein [Porphyromonas cangingivalis]	9e-66	WP_025839142.1
ORF 16	HNH nucleases; HNH endonuclease	hypothetical protein [Porphyromonas cangingivalis]	3e-78	WP_078735630.1
ORF 17	Phage terminase, small subunit; -Terminase_4 super family	hypothetical protein [Porphyromonas cangingivalis]	9e-83	WP_025839148.1
ORF 18	terminase large subunit	terminase large subunit [Porphyromonas cangingivalis]	0.0	WP_078735631.1
ORF 19	phage portal protein	phage portal protein [Porphyromonas cangingivalis]	0.0	WP_081775628.1
		phage portal protein [Porphyromonas cangingivalis]	0.0	WP_078735632.1
ORF 20	Phage prohead protease HK97 - Caudovirus prohead serine protease	hypothetical protein [Porphyromonas cangingivalis]	1e-160	WP_025839150.1
ORF 21	Phage_capsid super family	hypothetical protein [Porphyromonas cangingivalis]	0.0	WP_078735633.1
		Phage capsid family protein [Porphyromonas cangingivalis]	0.0	SJZ42735.1
ORF 22	phage gp6-like head-tail connector protein	phage gp6-like head-tail connector protein [Porphyromonas cangingivalis]	3e-72	WP_025839154.1
ORF 23	Head-tail adaptor protein - Phage head-tail joining protein;	head-tail adaptor protein [Porphyromonas cangingivalis]	8e-73	WP_078735634.1
ORF 24	hypothetical protein	hypothetical protein [Porphyromonas cangingivalis]	2e-118	WP_025839156.1
		hypothetical protein [Porphyromonas cangingivalis]	4e-115	WP_126464339.1
ORF 25	DUF3168 domain-containing protein	DUF3168 domain-containing protein [Porphyromonas cangingivalis]	1e-89	WP_025839158.1
ORF 26	Lambda phage tail tube protein, TTP	hypothetical protein [Porphyromonas cangingivalis]	7e-109	WP_025839160.1
ORF 27	hypothetical protein	hypothetical protein [Porphyromonas cangingivalis]	8e-159	WP_025839162.1
		hypothetical protein [Porphyromonas cangingivalis]	2e-67	WP_078735635.1
ORF 28	hypothetical protein	hypothetical protein [Porphyromonas cangingivalis]	0.0	WP_025839164.1
ORF 29	hypothetical protein	hypothetical protein [Porphyromonas cangingivalis]	4e-148	WP_025839166.1
		hypothetical protein [Porphyromonas cangingivalis]	3e-140	WP_078735637.1
ORF 30	hypothetical protein	hypothetical protein [Porphyromonas cangingivalis]	0.0	WP_078735637.1
		hypothetical protein [Porphyromonas cangingivalis]	0.0	WP_036853988.1
ORF 31	hypothetical protein	hypothetical protein [Porphyromonas cangingivalis]	0.0	WP_025839170.1
		hypothetical protein [Porphyromonas cangingivalis]	0.0	WP_078735638.1
ORF 32	hypothetical protein	hypothetical protein [Porphyromonas cangingivalis]	0.0	WP_078735638.1
		hypothetical protein [Porphyromonas cangingivalis]	0.0	WP_025839172.1
ORF 33	hypothetical protein	hypothetical protein [Porphyromonas cangingivalis]	3e-57	WP_025839174.1
ORF 34	hypothetical protein	hypothetical protein [Porphyromonas cangingivalis]	2e-115	WP_036853991.1
		hypothetical protein [Porphyromonas cangingivalis]	2e-115	WP_126464338.1
ORF 35	collagen-like protein	collagen-like protein [Porphyromonas cangingivalis]	0.0	WP_025839178.1
ORF 36	hypothetical protein, Sortilin-Vps10 super family	hypothetical protein [Porphyromonas cangingivalis]	0.0	WP_025839180.1
ORF 37	hypothetical protein	hypothetical protein [Porphyromonas cangingivalis]	1e-141	WP_025839183.1
ORF 38	hypothetical protein	hypothetical protein [Porphyromonas cangingivalis]	7e-71	WP_025839185.1
		glycosyl transferase [Porphyromonas cangingivalis]	2e-56	WP_126464337.1
ORF 39	hypothetical protein	hypothetical protein [Porphyromonas cangingivalis]	2e-107	WP_078735641.1
		hypothetical protein [Porphyromonas cangingivalis]	2e-107	WP_025839187.1
ORF 40	Peptidoglycan recognition proteins (PGRPs) - Zn-dependent N-Acetylmuramoyl-L-alanine Amidase	hypothetical protein [Porphyromonas cangingivalis]	3e-98	WP_025839189.1
ORF 41	hypothetical protein	hypothetical protein [Porphyromonas cangingivalis]	8e-103	WP_025839192.1
ORF 42	DUF4065 domain-containing protein	DUF4065 domain-containing protein [Porphyromonas cangingivalis]	3e-127	WP_025839193.1
		Uncharacterized phage-associated protein [Porphyromonas cangingivalis]	5e-119	SJZ43339.1
ORF 43	hypothetical protein	hypothetical protein [Porphyromonas cangingivalis]	3e-44	WP_036853996.1
		hypothetical protein [Porphyromonas cangingivalis]	1e-40	WP_126464336.1
ORF 44	hypothetical protein	hypothetical protein [Porphyromonas cangingivalis]	4e-47	WP_025839197.1
		hypothetical protein [Porphyromonas cangingivalis]	2e-46	WP_126464336.1
ORF 45	hypothetical protein	hypothetical protein [Porphyromonas cangingivalis]	3e-149	WP_025839199.1
ORF 46	Phage integrase/recombinase Phage integrase SAM-like domain	hypothetical protein [Porphyromonas cangingivalis]	0.0	WP_025839201.1

## Sheet: Prevotella timonensis UMB0818_p
ORF No.	Putative function (CDD)	Closest BLAST hit description (BLASTp)	E-value (BLASTp)	Genebank accession
ORF 1	Hypotetical protein/ record removed	hypothetical protein CJ232_04165 [Prevotella timonensis]	6e-66	PMC10700.1 (record removed: WP_102188075.1)
ORF 2	Hypotetical protein	hypothetical protein [Prevotella timonensis]	3e-46	WP_102188076.1
ORF 3	Prophage antirepressor	phage antirepressor KilAC domain-containing protein [Prevotella timonensis]	0.0	WP_102188077.1
ORF 4	helix-turn-helix domain-containing protein	helix-turn-helix domain-containing protein [Prevotella timonensis]	6e-63	WP_102188078.1
ORF 5	Hypotetical protein	hypothetical protein [Prevotella timonensis]	2e-53	WP_102188079.1
ORF 6	Conjugal transfer prote	hypothetical protein [Prevotella timonensis]	2e-73	WP_102188132.1
ORF 7	anti-TRAP (AT) protein specific	hypothetical protein [Prevotella timonensis]	2e-180	WP_102188080.1
ORF 8	Hypotetical protein	hypothetical protein [Prevotella timonensis]	2e-35	WP_102188081.1
ORF 9	Hypotetical protein	hypothetical protein [Prevotella timonensis]	2e-47	WP_102188082.1
ORF 10	Hypotetical protein	hypothetical protein [Prevotella timonensis]	6e-62	WP_146002991.1
ORF 11	chromosome partitioning protein ParB	chromosome partitioning protein ParB [Prevotella timonensis]	0.0	WP_102188084.1
ORF 12	AAA family ATPase	AAA family ATPase [Prevotella timonensis]	0.0	WP_102188085.1
ORF 13	recombinase RecT	recombinase RecT [Prevotella timonensis]	0.0	WP_102188086.1
ORF 14	MBL fold metallo-hydrolase	MBL fold metallo-hydrolase [Prevotella timonensis]	0.0	WP_102188087.1
ORF 15	Hypotetical protein	hypothetical protein [Prevotella timonensis]	0.0	WP_102188088.1
ORF 16	Hypotetical protein	hypothetical protein [Prevotella timonensis]	2e-151	WP_102188089.1
ORF 17	HNH endonuclease	HNH endonuclease [Prevotella timonensis]	3e-83	WP_102188090.1
ORF 18	Hypotetical protein	hypothetical protein [Prevotella timonensis]	0.0	WP_102188091.1
ORF 19	terminase small subunit (DNA-packaging protein gp3)	hypothetical protein [Prevotella timonensis]	2e-180	WP_102188092.1
ORF 20	terminase large subunit	terminase large subunit [Prevotella timonensis]	0.0	WP_102188093.1
ORF 21	phage portal protein	phage portal protein [Prevotella timonensis]	0.0	WP_102188094.1
ORF 22	HK97 family phage prohead protease	HK97 family phage prohead protease [Prevotella timonensis]	6e-160	WP_102188095.1
ORF 23	phage major capsid protein	phage major capsid protein [Prevotella timonensis]	0.0	WP_102188096.1
ORF 24	phage gp6-like head-tail connector protein	phage gp6-like head-tail connector protein [Prevotella timonensis]	3e-69	WP_102188097.1
ORF 25	head-tail adaptor protein	head-tail adaptor protein [Prevotella timonensis]	1e-73	WP_102188098.1
ORF 26	Lambda phage tail tube protein,	hypothetical protein [Prevotella timonensis]	2e-111	WP_102188099.1
ORF 27	removed	hypothetical protein [Prevotella timonensis]	3e-70	WP_102188100.1
ORF 28	hypothetical protein	hypothetical protein CJ232_04300 [Prevotella timonensis]	1e-68	PMC10726.1
ORF 29	removed
ORF 30	DUF3168 domain-containing protein	DUF3168 domain-containing protein [Prevotella timonensis]	2e-84	WP_102188102.1
ORF 31	hypothetical protein	hypothetical protein [Prevotella timonensis]	2e-139	WP_102188103.1
ORF 32	phage tail tape measure protein	phage tail tape measure protein [Prevotella timonensis]	0.0	WP_102188104.1
ORF 33	hypothetical protein	hypothetical protein [Prevotella timonensis]	0.0	WP_102188105.1
ORF 34	hypothetical protein	hypothetical protein [Prevotella timonensis]	0.0	WP_102188106.1
ORF 35	Neuromodulin_N	hypothetical protein [Prevotella timonensis]	0.0	WP_102188107.1
ORF 36	hypothetical protein	hypothetical protein [Prevotella timonensis]	0.0	WP_102188108.1
ORF 37	DUF4376 domain-containing protein	DUF4376 domain-containing protein [Prevotella timonensis]	3e-128	WP_102188109.1
ORF 38	hypothetical protein	hypothetical protein [Prevotella timonensis]	3e-74	WP_102188110.1
ORF 39	hypothetical protein	hypothetical protein [Prevotella timonensis]	4e-52	WP_102188111.1
ORF 40	YfiM family lipoprotein; Uncharacterized conserved protein YfiM, DUF2279 famil	hypothetical protein [Prevotella timonensis]	8e-53	WP_146002993.1
ORF 41	hypothetical protein	hypothetical protein [Prevotella timonensis]	5e-57	WP_102188113.1
ORF 42	dsDNA phages phage-related lysozyme (muramidase)	lysozyme [Prevotella timonensis]	6e-105	WP_102188114.1
ORF 43	hypothetical protein	hypothetical protein CJ232_04370 [Prevotella timonensis]	2e-75	PMC10740.1
ORF 44	hypothetical protein	hypothetical protein [Prevotella timonensis]	9e-128	WP_102188116.1
ORF 45	removed
ORF 46	Helix-turn-helix domain of resolvase;	hypothetical protein [Prevotella timonensis]	2e-57	WP_102188117.1
ORF 47	integrase catalytic domain-containing protein tyrosine recombinase XerD;	integrase catalytic domain-containing protein [Prevotella timonensis]	0.0	WP_102188118.1
