# Supplementary material for: Novel Siphoviridae Bacteriophages Infecting Bacteroides uniformis Contain Diversity Generating Retroelement
Source: Microorganisms. 2021 Apr 21;9(5):892. doi: 10.3390/microorganisms9050892 (PMC8143477; doi:10.3390/microorganisms9050892)
Supplement: Supplementary file 1 [file microorganisms-09-00892-s001.zip › Data sheet S2 Abundance of reads aligning to Bacuni F1 in gut metagenomes.xlsx]

## Sheet: Cameroon
SRR Run	pct pairs	num pairs	pct bases	num bases	Match rate:	BioSample	Bases	Size (Bytes)	Experiment	geo_loc_name	Isolate	lat_lon
SRR7892426	0.0012%	30	0.0012%	6824	78.7836%	SAMN10080897	1.09 G	451.37 Mb	SRX4730065	Cameroon: Kumba	Pool 21	4.6333 N 9.445 E
SRR7892427	0.0007%	43	0.0006%	9210	78.7627%	SAMN10080898	1.53 G	638.57 Mb	SRX4730064	Cameroon: Kumba	Pool 22	4.6333 N 9.445 E
SRR7892428	0.0021%	108	0.0017%	19924	78.5873%	SAMN10080899	1.25 G	518.97 Mb	SRX4730063	Cameroon: Kumba	Pool 23	4.6333 N 9.445 E
SRR7892429	0.0350%	1701	0.0364%	470598	77.1987%	SAMN10080900	1.40 G	595.72 Mb	SRX4730062	Cameroon: Kumba	Pool 24	4.6333 N 9.445 E
SRR7892430	0.0008%	28	0.0003%	3216	78.6467%	SAMN10080901	1.11 G	483.31 Mb	SRX4730061	Cameroon: Kumba	Pool 25	4.6333 N 9.445 E
SRR7892431	0.0001%	4	0.0001%	552	79.8960%	SAMN10080902	1.13 G	488.35 Mb	SRX4730060	Cameroon: Lysoka	Pool 26	4.148 N 9.245 E
SRR7892432	0.0002%	9	0.0002%	2216	78.5139%	SAMN10080903	1.14 G	490.21 Mb	SRX4730059	Cameroon: Lysoka	Pool 27	4.148 N 9.245 E
SRR7892433	0.0002%	8	0.0002%	1748	79.8752%	SAMN10080904	1.23 G	540.91 Mb	SRX4730058	Cameroon: Lysoka	Pool 28	4.148 N 9.245 E
SRR7892434	0.0000%	0	0.0000%	0	NaN%	SAMN10080905	1.34 G	594.04 Mb	SRX4730057	Cameroon: Kumba	Pool 29	4.6333 N 9.445 E
SRR7892435	0.0000%	1	0.0000%	104	82.6923%	SAMN10080906	881.84 M	384.84 Mb	SRX4730056	Cameroon: Kumba	Pool 30	4.6333 N 9.445 E
SRR7892436	0.0000%	1	0.0000%	182	74.7253%	SAMN10080937	877.53 M	403.62 Mb	SRX4730055	Cameroon: Kumba	Pool 61	4.6333 N 9.445 E
SRR7892437	0.0000%	0	0.0000%	0	NaN%	SAMN10080885	3.48 G	1.33 Gb	SRX4730054	Cameroon: Lysoka	Pool 9	4.148 N 9.245 E
SRR7892438	0.0003%	4	0.0001%	578	78.4014%	SAMN10080928	1.11 G	509.14 Mb	SRX4730053	Cameroon: Kumba	Pool 52	4.6333 N 9.445 E
SRR7892439	0.0026%	108	0.0028%	27804	79.3293%	SAMN10080927	1.25 G	582.71 Mb	SRX4730052	Cameroon: Kumba	Pool 51	4.6333 N 9.445 E
SRR7892440	0.0442%	866	0.0456%	228448	79.5587%	SAMN10080930	602.32 M	279.57 Mb	SRX4730051	Cameroon: Kumba	Pool 54	4.6333 N 9.445 E
SRR7892441	0.0000%	0	0.0000%	0	NaN%	SAMN10080929	1.09 G	508.65 Mb	SRX4730050	Cameroon: Kumba	Pool 53	4.6333 N 9.445 E
SRR7892442	0.1240%	6066	0.1276%	1444540	75.4572%	SAMN10080896	1.22 G	508.95 Mb	SRX4730049	Cameroon: Kumba	Pool 20	4.6333 N 9.445 E
SRR7892443	0.0000%	0	0.0000%	0	NaN%	SAMN10080895	1.36 G	575.10 Mb	SRX4730048	Cameroon: Kumba	Pool 19	4.6333 N 9.445 E
SRR7892444	0.0000%	1	0.0000%	104	86.3014%	SAMN10080934	959.52 M	443.20 Mb	SRX4730047	Cameroon: Kumba	Pool 58	4.6333 N 9.445 E
SRR7892445	0.0000%	0	0.0000%	0	NaN%	SAMN10080933	1.29 G	596.47 Mb	SRX4730046	Cameroon: Kumba	Pool 57	4.6333 N 9.445 E
SRR7892446	0.0002%	7	0.0001%	1170	80.4805%	SAMN10080892	1.12 G	470.92 Mb	SRX4730045	Cameroon: Kumba	Pool 16	4.6333 N 9.445 E
SRR7892447	0.0061%	69	0.0053%	12922	79.1910%	SAMN10080891	1.15 G	487.01 Mb	SRX4730044	Cameroon: Kumba	Pool 15	4.6333 N 9.445 E
SRR7892448	0.0002%	8	0.0001%	1788	78.0170%	SAMN10080894	1.44 G	609.27 Mb	SRX4730043	Cameroon: Lysoka	Pool 18	4.148 N 9.245 E
SRR7892449	0.0006%	1	0.0002%	36	72.2222%	SAMN10080893	1.24 G	522.83 Mb	SRX4730042	Cameroon: Kumba	Pool 17	4.6333 N 9.445 E
SRR7892450	0.0000%	3	0.0000%	248	80.0000%	SAMN10080888	1.55 G	639.75 Mb	SRX4730041	Cameroon: Kumba	Pool 12	4.6333 N 9.445 E
SRR7892451	0.0001%	1	0.0001%	196	80.6122%	SAMN10080887	959.41 M	408.93 Mb	SRX4730040	Cameroon: Kumba	Pool 11	4.6333 N 9.445 E
SRR7892452	0.0001%	5	0.0000%	520	81.6860%	SAMN10080890	1.52 G	641.15 Mb	SRX4730039	Cameroon: Kumba	Pool 14	4.6333 N 9.445 E
SRR7892453	0.0001%	1	0.0001%	302	80.1325%	SAMN10080889	1.35 G	551.29 Mb	SRX4730038	Cameroon: Kumba	Pool 13	4.6333 N 9.445 E
SRR7892454	0.0000%	2	0.0000%	338	78.1065%	SAMN10080914	1.01 G	436.79 Mb	SRX4730037	Cameroon: Lysoka	Pool 38	4.148 N 9.245 E
SRR7892455	0.0013%	81	0.0011%	15222	79.4725%	SAMN10080913	1.63 G	726.70 Mb	SRX4730036	Cameroon: Lysoka	Pool 37	4.148 N 9.245 E
SRR7892456	0.0000%	0	0.0000%	0	NaN%	SAMN10080912	2.07 G	913.82 Mb	SRX4730035	Cameroon: Lysoka	Pool 36	4.148 N 9.245 E
SRR7892457	0.0004%	28	0.0003%	6086	82.4840%	SAMN10080911	2.11 G	936.21 Mb	SRX4730034	Cameroon: Lysoka	Pool 35	4.148 N 9.245 E
SRR7892458	0.0001%	6	0.0001%	628	76.8473%	SAMN10080910	1.22 G	540.63 Mb	SRX4730033	Cameroon: Kumba	Pool 34	4.6333 N 9.445 E
SRR7892459	0.0023%	115	0.0019%	21198	79.5643%	SAMN10080909	1.26 G	549.08 Mb	SRX4730032	Cameroon: Kumba	Pool 33	4.6333 N 9.445 E
SRR7892460	0.0003%	11	0.0003%	2414	79.4262%	SAMN10080908	980.40 M	429.46 Mb	SRX4730031	Cameroon: Kumba	Pool 32	4.6333 N 9.445 E
SRR7892461	0.0152%	645	0.0150%	141700	82.3180%	SAMN10080907	1.05 G	459.56 Mb	SRX4730030	Cameroon: Kumba	Pool 31	4.6333 N 9.445 E
SRR7892462	0.0000%	0	0.0000%	0	NaN%	SAMN10080939	1.12 G	513.82 Mb	SRX4730029	Cameroon: Kumba	Pool 63	4.6333 N 9.445 E
SRR7892463	0.0005%	5	0.0004%	1082	80.0370%	SAMN10080916	1.72 G	766.07 Mb	SRX4730028	Cameroon: Lysoka	Pool 40	4.148 N 9.245 E
SRR7892464	0.0001%	4	0.0000%	770	80.1382%	SAMN10080915	2.14 G	963.65 Mb	SRX4730027	Cameroon: Lysoka	Pool 39	4.148 N 9.245 E
SRR7892465	0.0000%	0	0.0000%	0	NaN%	SAMN10080932	792.37 M	372.94 Mb	SRX4730026	Cameroon: Kumba	Pool 56	4.6333 N 9.445 E
SRR7892466	0.0007%	20	0.0007%	4808	78.3405%	SAMN10080936	869.86 M	405.42 Mb	SRX4730025	Cameroon: Kumba	Pool 60	4.6333 N 9.445 E
SRR7892467	0.0006%	21	0.0005%	4518	78.0221%	SAMN10080935	1.07 G	495.04 Mb	SRX4730024	Cameroon: Kumba	Pool 59	4.6333 N 9.445 E
SRR7892468	0.0015%	47	0.0015%	12066	81.2485%	SAMN10080938	952.11 M	445.70 Mb	SRX4730023	Cameroon: Lysoka	Pool 62	4.148 N 9.245 E
SRR7892469	0.0009%	45	0.0008%	8458	80.7974%	SAMN10080884	1.13 G	485.92 Mb	SRX4730022	Cameroon: Lysoka	Pool 8	4.148 N 9.245 E
SRR7892470	0.0070%	451	0.0059%	76268	79.3080%	SAMN10080883	1.40 G	592.01 Mb	SRX4730021	Cameroon: Kumba	Pool 7	4.6333 N 9.445 E
SRR7892471	0.0002%	11	0.0001%	1068	84.9251%	SAMN10080882	1.36 G	577.82 Mb	SRX4730020	Cameroon: Lysoka	Pool 6	4.148 N 9.245 E
SRR7892472	0.0009%	9	0.0009%	2058	78.3385%	SAMN10080881	929.93 M	392.54 Mb	SRX4730019	Cameroon: Lysoka	Pool 5	4.148 N 9.245 E
SRR7892473	0.0001%	4	0.0000%	341	72.1823%	SAMN10080880	1.01 G	439.15 Mb	SRX4730018	Cameroon: Lysoka	Pool 4	4.148 N 9.245 E
SRR7892474	0.0000%	0	0.0000%	0	NaN%	SAMN10080879	1.23 G	538.02 Mb	SRX4730017	Cameroon: Lysoka	Pool 3	4.148 N 9.245 E
SRR7892475	0.0116%	842	0.0104%	151916	79.6245%	SAMN10080878	1.58 G	671.30 Mb	SRX4730016	Cameroon: Lysoka	Pool 2	4.148 N 9.245 E

## Sheet: Peru & USA PRJNA268964
	SRR Run	pct pairs /reads	num pairs/reads	pct bases/reads	num bases/reads	Match rate: pct bases	BioSample	Size (Bases)	Bytes	Collection_Date	Experiment	geo_loc_name_country	geo_loc_name_country_continent	geo_loc_name	lat_lon	Library Name	LibraryLayout
1	SRR1761664	0.0044%	130	0.0046%	35836	65.1992% (22482 bp), 82.2524% (22079)	SAMN03283237	795.44 M	450.98 Mb	2012	SRX844686	Peru	South America	Peru	9.91 S 76.23 W	HCO02.paired	PAIRED
2	SRR1761665	0.0003%	15	0.0003%	4030	81.5342%	SAMN03283238	1.37 G	784.33 Mb	2012	SRX844687	Peru	South America	Peru	9.91 S 76.23 W	HCO07.paired	PAIRED
3	SRR1761666	0.0000%	0	0.0000%	0	0.0000%	SAMN03283239	1.39 G	781.36 Mb	2012	SRX844688	Peru	South America	Peru	9.91 S 76.23 W	HCO09.paired	PAIRED
4	SRR1761667	0.0000%	0	0.0000%	0	0.0000%	SAMN03283240	1.29 G	734.46 Mb	2012	SRX844689	Peru	South America	Peru	9.91 S 76.23 W	HCO11.paired	PAIRED
5	SRR1761668	0.0000%	0	0.0000%	0	0.0000%	SAMN03283241	1.18 G	674.08 Mb	2012	SRX844690	Peru	South America	Peru	9.91 S 76.23 W	HCO12.paired	PAIRED
6	SRR1761669	0.0000%	1	0.0000%	151	82.1192%	SAMN03283242	863.34 M	492.83 Mb	2012	SRX844691	Peru	South America	Peru	9.91 S 76.23 W	HCO53.paired	PAIRED
7	SRR1761670	0.0000%	0	0.0000%	0	0.0000%	SAMN03283243	1.52 G	869.43 Mb	2012	SRX844692	Peru	South America	Peru	9.91 S 76.23 W	HCO61.paired	PAIRED
8	SRR1761671	0.0001%	4	0.0001%	264	79.5455%	SAMN03283244	1.76 G	995.48 Mb	2012	SRX844693	Peru	South America	Peru	9.91 S 76.23 W	HCO64.paired	PAIRED
9	SRR1761672	0.0000%	0	0.0000%	0	0.0000%	SAMN03283245	1.44 G	821.23 Mb	2012	SRX844694	Peru	South America	Peru	9.91 S 76.23 W	HCO67.paired	PAIRED
10	SRR1761673	0.0007%	1	0.0005%	97	80.4124%	SAMN03283246	1.76 G	997.96 Mb	2012	SRX844695	Peru	South America	Peru	9.91 S 76.23 W	HCO70.paired	PAIRED
11	SRR1761674	0.0000%	0	0.0000%	0	0.0000%	SAMN03283247	927.33 M	524.93 Mb	2012	SRX844696	Peru	South America	Peru	9.91 S 76.23 W	HCO72.paired	PAIRED
12	SRR1761675	0.0008%	1	0.0009%	302	86.7550%	SAMN03283248	1.57 G	880.82 Mb	2012	SRX844697	Peru	South America	Peru	9.91 S 76.23 W	HCO74.paired	PAIRED
13	SRR1761676	0.0000%	0	0.0000%	0	NaN%	SAMN03283249	3.77 G	2.19 Gb	2013	SRX844698	USA	North America	USA	35.21 N 97.43 W	NO01.paired	PAIRED
14	SRR1761677	0.0000%	0	0.0000%	0	NaN%	SAMN03283250	4.77 G	2.74 Gb	2013	SRX844699	USA	North America	USA	35.21 N 97.43 W	NO02.paired	PAIRED
15	SRR1761678	0.0000%	0	0.0000%	0	NaN%	SAMN03283251	4.91 G	2.83 Gb	2013	SRX844700	USA	North America	USA	35.21 N 97.43 W	NO03.paired	PAIRED
16	SRR1761679	0.0000%	0	0.0000%	0	NaN%	SAMN03283252	4.34 G	2.50 Gb	2013	SRX844701	USA	North America	USA	35.21 N 97.43 W	NO04.paired	PAIRED
17	SRR1761680	0.0000%	0	0.0000%	0	NaN%	SAMN03283253	4.43 G	2.56 Gb	2013	SRX844702	USA	North America	USA	35.21 N 97.43 W	NO05.paired	PAIRED
18	SRR1761681	0.0000%	0	0.0000%	0	NaN%	SAMN03283254	3.61 G	2.07 Gb	2013	SRX844703	USA	North America	USA	35.21 N 97.43 W	NO06.paired	PAIRED
19	SRR1761682	0.0000%	0	0.0000%	0	NaN%	SAMN03283255	3.98 G	2.22 Gb	2013	SRX844704	USA	North America	USA	35.21 N 97.43 W	NO08.paired	PAIRED
20	SRR1761683	0.0000%	0	0.0000%	0	NaN%	SAMN03283256	3.47 G	1.94 Gb	2013	SRX844705	USA	North America	USA	35.21 N 97.43 W	NO09.paired	PAIRED
21	SRR1761684	0.0000%	0	0.0000%	0	NaN%	SAMN03283257	4.41 G	2.46 Gb	2013	SRX844706	USA	North America	USA	35.21 N 97.43 W	NO10.paired	PAIRED
22	SRR1761685	0.0000%	0	0.0000%	0	NaN%	SAMN03283258	4.66 G	2.60 Gb	2013	SRX844707	USA	North America	USA	35.21 N 97.43 W	NO11.paired	PAIRED
23	SRR1761686	0.0000%	0	0.0000%	0	NaN%	SAMN03283259	4.55 G	2.55 Gb	2013	SRX844708	USA	North America	USA	35.21 N 97.43 W	NO12.paired	PAIRED
24	SRR1761687	0.0000%	0	0.0000%	0	NaN%	SAMN03283260	4.16 G	2.32 Gb	2013	SRX844709	USA	North America	USA	35.21 N 97.43 W	NO13.paired	PAIRED
25	SRR1761688	0.0000%	0	0.0000%	0	NaN%	SAMN03283261	4.26 G	2.39 Gb	2013	SRX844710	USA	North America	USA	35.21 N 97.43 W	NO14.paired	PAIRED
26	SRR1761689	0.0000%	0	0.0000%	0	NaN%	SAMN03283262	3.71 G	2.11 Gb	2013	SRX844711	USA	North America	USA	35.21 N 97.43 W	NO15.paired	PAIRED
27	SRR1761690	0.0000%	0	0.0000%	0	NaN%	SAMN03283263	5.21 G	2.98 Gb	2013	SRX844712	USA	North America	USA	35.21 N 97.43 W	NO16.paired	PAIRED
28	SRR1761691	0.0000%	0	0.0000%	0	NaN%	SAMN03283264	3.98 G	2.26 Gb	2013	SRX844713	USA	North America	USA	35.21 N 97.43 W	NO17.paired	PAIRED
29	SRR1761692	0.0000%	0	0.0000%	0	NaN%	SAMN03283265	4.52 G	2.57 Gb	2013	SRX844714	USA	North America	USA	35.21 N 97.43 W	NO18.paired	PAIRED
30	SRR1761693	0.0005%	3	0.0005%	524	82.4363%	SAMN03283266	4.23 G	2.41 Gb	2013	SRX844715	USA	North America	USA	35.21 N 97.43 W	NO19.paired	PAIRED
31	SRR1761694	0.0000%	0	0.0000%	0	NaN%	SAMN03283267	4.24 G	2.42 Gb	2013	SRX844716	USA	North America	USA	35.21 N 97.43 W	NO20.paired	PAIRED
32	SRR1761695	0.0000%	0	0.0000%	0	NaN%	SAMN03283268	4.05 G	2.31 Gb	2013	SRX844717	USA	North America	USA	35.21 N 97.43 W	NO21.paired	PAIRED
33	SRR1761696	0.0000%	0	0.0000%	0	NaN%	SAMN03283269	4.52 G	2.57 Gb	2013	SRX844718	USA	North America	USA	35.21 N 97.43 W	NO22.paired	PAIRED
34	SRR1761697	0.0000%	0	0.0000%	0	NaN%	SAMN03283270	4.87 G	2.78 Gb	2013	SRX844719	USA	North America	USA	35.21 N 97.43 W	NO23.paired	PAIRED
35	SRR1761698	0.0000%	0	0.0000%	0	0.0000%	SAMN03283271	5.03 G	2.96 Gb	2012	SRX844720	Peru	South America	Peru	5.68 S 73.33 W	SM01.paired	PAIRED
36	SRR1761699	0.0005%	1	0.0006%	76	76.3158%	SAMN03283272	6.48 G	3.76 Gb	2012	SRX844721	Peru	South America	Peru	5.68 S 73.33 W	SM02.paired	PAIRED
37	SRR1761700	0.0000%	0	0.0000%	0	0.0000%	SAMN03283273	3.17 G	1.86 Gb	2012	SRX844722	Peru	South America	Peru	5.68 S 73.33 W	SM03.paired	PAIRED
38	SRR1761701	0.0000%	0	0.0000%	0	0.0000%	SAMN03283274	3.28 G	1.94 Gb	2012	SRX844723	Peru	South America	Peru	5.68 S 73.33 W	SM05.paired	PAIRED
39	SRR1761702	0.0011%	2	0.0007%	96	85.4167%	SAMN03283275	4.59 G	2.69 Gb	2012	SRX844724	Peru	South America	Peru	5.68 S 73.33 W	SM11.paired	PAIRED
40	SRR1761703	0.0005%	1	0.0005%	152	84.2105%	SAMN03283276	4.45 G	2.60 Gb	2012	SRX844725	Peru	South America	Peru	5.68 S 73.33 W	SM18.paired	PAIRED
41	SRR1761704	0.0000%	0	0.0000%	0	0.0000%	SAMN03283277	4.12 G	2.42 Gb	2012	SRX844726	Peru	South America	Peru	5.68 S 73.33 W	SM20.paired	PAIRED
42	SRR1761705	0.0000%	0	0.0000%	0	0.0000%	SAMN03283278	4.22 G	2.46 Gb	2012	SRX844727	Peru	South America	Peru	5.68 S 73.33 W	SM23.paired	PAIRED
43	SRR1761706	0.0000%	0	0.0000%	0	0.0000%	SAMN03283279	4.65 G	2.69 Gb	2012	SRX844728	Peru	South America	Peru	5.68 S 73.33 W	SM24.paired	PAIRED
44	SRR1761707	0.0013%	3	0.0014%	448	84.7584%	SAMN03283280	4.43 G	2.51 Gb	2012	SRX844729	Peru	South America	Peru	5.68 S 73.33 W	SM25.paired	PAIRED
45	SRR1761708	0.0000%	0	0.0000%	0	0.0000%	SAMN03283281	3.91 G	2.20 Gb	2012	SRX844730	Peru	South America	Peru	5.68 S 73.33 W	SM28.paired	PAIRED
46	SRR1761709	0.0000%	0	0.0000%	0	0.0000%	SAMN03283282	4.31 G	2.40 Gb	2012	SRX844731	Peru	South America	Peru	5.68 S 73.33 W	SM29.paired	PAIRED
47	SRR1761710	0.0005%	1	0.0005%	152	85.3333%	SAMN03283283	3.99 G	2.25 Gb	2012	SRX844732	Peru	South America	Peru	5.68 S 73.33 W	SM30.paired	PAIRED
48	SRR1761711	no match in paring data	0.0000%	0	0.0000%	0	SAMN03283284	4.27 G	2.42 Gb	2012	SRX844733	Peru	South America	Peru	5.68 S 73.33 W	SM31.paired	PAIRED
49	SRR1761712	no match in paring data	0.0000%	0	0.0000%	0	SAMN03283285	4.94 G	2.86 Gb	2012	SRX844734	Peru	South America	Peru	5.68 S 73.33 W	SM32.paired	PAIRED
50	SRR1761713	no match in paring data	0.0000%	0	0.0000%	0	SAMN03283286	4.01 G	2.32 Gb	2012	SRX844735	Peru	South America	Peru	5.68 S 73.33 W	SM33.paired	PAIRED

## Sheet: Italy&Tanzania PRJNA278393
SRR Run	pct pairs /reads	num pairs/reads	pct bases/reads	num bases/reads	Match rate: pct bases	BioSample	Size (Bases)	Size (Bytes)	Collection_Date	Experiment	geo_loc_name_country	geo_loc_name_country_continent	geo_loc_name	lat_lon
SRR1927149	0.0009%	1	0.0009%	100	84.0000%	SAMN03418252	2.83 G	1.92 Gb	Jan-2013	SRX966718	Tanzania	Africa	Tanzania	3.6347588 S 35.0828588 E
SRR1929408	0.0014%	1	0.0014%	100	79.0000%	SAMN03418253	6.14 G	3.82 Gb	Jan-2013	SRX966737	Tanzania	Africa	Tanzania	3.6347588 S 35.0828588 E
SRR1929484	0.0004%	1	0.0003%	70	81.4286%	SAMN03418254	1.57 G	1.10 Gb	Jan-2013	SRX966738	Tanzania	Africa	Tanzania	3.6347588 S 35.0828588 E
SRR1929485	0.0006%	1	0.0006%	200	89.0000% /97.0000%	SAMN03418255	899.60 M	642.54 Mb	Jan-2013	SRX966739	Tanzania	Africa	Tanzania	3.6347588 S 35.0828588 E
SRR1929563	0.0021%	5	0.0021%	500	83.0040%	SAMN03418256	2.66 G	1.83 Gb	Jan-2013	SRX967597	Tanzania	Africa	Tanzania	3.6347588 S 35.0828588 E
SRR1929574	0.0008%	1	0.0008%	200	83.4197%	SAMN03418258	1.98 G	1.36 Gb	Jan-2013	SRX967599	Tanzania	Africa	Tanzania	3.6347588 S 35.0828588 E
SRR1930121	0.0006%	1	0.0006%	200	84.0000%	SAMN03418257	6.83 G	4.35 Gb	Jan-2013	SRX967598	Tanzania	Africa	Tanzania	3.6347588 S 35.0828588 E
SRR1930122	0.0000%	0	0.0000%	0	0.0000%	SAMN03418259	2.93 G	1.99 Gb	Jan-2013	SRX967600	Tanzania	Africa	Tanzania	3.6347588 S 35.0828588 E
SRR1930123	0.0000%	0	0.0000%	0	0.0000%	SAMN03418260	7.49 G	4.79 Gb	Jan-2013	SRX967601	Tanzania	Africa	Tanzania	3.6347588 S 35.0828588 E
SRR1930128	0.0000%	0	0.0000%	0	0.0000%	SAMN03418261	2.94 G	1.96 Gb	Jan-2013	SRX967602	Tanzania	Africa	Tanzania	3.6347588 S 35.0828588 E
SRR1930132	0.0010%	1	0.0010%	100	79.0000%	SAMN03418262	945.58 M	666.72 Mb	Jan-2013	SRX967603	Tanzania	Africa	Tanzania	3.6347588 S 35.0828588 E
SRR1930133	0.0023%	4	0.0023%	402	83.3333%	SAMN03418263	988.22 M	471.05 Mb	Jan-2013	SRX967604	Tanzania	Africa	Tanzania	3.6347588 S 35.0828588 E
SRR1930134	0.0000%	0	0.0000%	0	0.0000%	SAMN03418264	2.15 G	1.47 Gb	Jan-2013	SRX967605	Tanzania	Africa	Tanzania	3.6347588 S 35.0828588 E
SRR1930136	0.0010%	2	0.0010%	336	83.4409%	SAMN03418265	2.30 G	1.62 Gb	Jan-2013	SRX967606	Tanzania	Africa	Tanzania	3.6347588 S 35.0828588 E
SRR1930138	0.0019%	2	0.0020%	400	82.4286%	SAMN03418266	923.72 M	654.67 Mb	Jan-2013	SRX967607	Tanzania	Africa	Tanzania	3.6347588 S 35.0828588 E
SRR1930140	0.0024%	2	0.0025%	195	84.1026%	SAMN03418267	1.62 G	1.08 Gb	Jan-2013	SRX967608	Tanzania	Africa	Tanzania	3.6347588 S 35.0828588 E
SRR1930141	0.0000%	0	0.0000%	0	0.0000%	SAMN03418268	6.26 G	3.83 Gb	Jan-2013	SRX967609	Tanzania	Africa	Tanzania	3.6347588 S 35.0828588 E
SRR1930142	0.0058%	8	0.0059%	1610	84.0735%	SAMN03418269	1.06 G	515.23 Mb	Jan-2013	SRX967610	Tanzania	Africa	Tanzania	3.6347588 S 35.0828588 E
SRR1930143	0.0024%	1	0.0026%	200	81.1111%	SAMN03418270	1.22 G	893.40 Mb	Jan-2013	SRX967611	Tanzania	Africa	Tanzania	3.6347588 S 35.0828588 E
SRR1930144	0.0000%	0	0.0000%	0	0.0000%	SAMN03418271	941.27 M	672.48 Mb	Jan-2013	SRX967613	Tanzania	Africa	Tanzania	3.6347588 S 35.0828588 E
SRR1930145	0.0000%	0	0.0000%	0	0.0000%	SAMN03418272	3.15 G	2.16 Gb	Jan-2013	SRX967614	Tanzania	Africa	Tanzania	3.6347588 S 35.0828588 E
SRR1930149	0.0010%	1	0.0010%	100	77.0000%	SAMN03418273	771.27 M	552.09 Mb	Jan-2013	SRX967615	Tanzania	Africa	Tanzania	3.6347588 S 35.0828588 E
SRR1930176	0.0000%	0	0.0000%	0	0.0000%	SAMN03418274	883.28 M	644.55 Mb	Jan-2013	SRX967616	Tanzania	Africa	Tanzania	3.6347588 S 35.0828588 E
SRR1930177	0.0000%	0	0.0000%	0	0.0000%	SAMN03418275	1.05 G	751.05 Mb	Jan-2013	SRX967617	Tanzania	Africa	Tanzania	3.6347588 S 35.0828588 E
SRR1930179	0.0012%	2	0.0013%	400	81.5000%	SAMN03418276	981.00 M	751.21 Mb	Jan-2013	SRX967618	Tanzania	Africa	Tanzania	3.6347588 S 35.0828588 E
SRR1930187	0.0000%	0	0.0000%	0	0.0000%	SAMN03418277	760.30 M	576.48 Mb	Jan-2013	SRX967619	Tanzania	Africa	Tanzania	3.6347588 S 35.0828588 E
SRR1930244	0.0010%	1	0.0004%	41	35.4545%	SAMN03418278	1.53 G	1.05 Gb	Jan-2013	SRX967620	Tanzania	Africa	Tanzania	3.6347588 S 35.0828588 E
SRR1930247	0.0007%	13	0.0001%	226	84.5133%	SAMN03418279	364.91 M	247.27 Mb	Apr-2013	SRX967621	Italy	Europe	Italy	44.4950537 N 11.3427401 E
SRR1930248	0.0009%	44	0.0002%	765	85.6771%	SAMN03418280	817.88 M	593.81 Mb	Apr-2013	SRX967622	Italy	Europe	Italy	44.4950537 N 11.3427401 E
SRR1930250	0.0002%	3	0.0000%	50	86.0000%	SAMN03418282	316.54 M	229.07 Mb	Apr-2013	SRX967656	Italy	Europe	Italy	44.4950537 N 11.3427401 E
SRR1930251	0.0000%	0	0.0000%	0	NaN%	SAMN03418281	449.52 M	343.55 Mb	Apr-2013	SRX967623	Italy	Europe	Italy	44.4950537 N 11.3427401 E
SRR1930253	0.0001%	8	0.0000%	144	83.3333%	SAMN03418283	1.90 G	1.35 Gb	Apr-2013	SRX967657	Italy	Europe	Italy	44.4950537 N 11.3427401 E
SRR1930255	0.0001%	4	0.0000%	70	84.2857%	SAMN03418284	1.40 G	980.98 Mb	Apr-2013	SRX967679	Italy	Europe	Italy	44.4950537 N 11.3427401 E
SRR1930777	0.0003%	9	0.0000%	158	82.9114%	SAMN03418285	536.19 M	385.98 Mb	Apr-2013	SRX967680	Italy	Europe	Italy	44.4950537 N 11.3427401 E
SRR1931170	0.0001%	14	0.0000%	260	82.8244%	SAMN03418286	3.21 G	2.19 Gb	Apr-2013	SRX967727	Italy	Europe	Italy	44.4950537 N 11.3427401 E
SRR1931173	0.0025%	43	0.0026%	8600	79.9129%	SAMN03418287	4.63 G	2.86 Gb	Apr-2013	SRX968042	Italy	Europe	Italy	44.4950537 N 11.3427401 E
SRR1931177	0.0003%	10	0.0000%	166	86.1446%	SAMN03418288	548.26 M	396.25 Mb	Apr-2013	SRX968043	Italy	Europe	Italy	44.4950537 N 11.3427401 E
SRR1931178	0.0006%	24	0.0001%	415	85.7831%	SAMN03418289	643.72 M	466.66 Mb	Apr-2013	SRX968044	Italy	Europe	Italy	44.4950537 N 11.3427401 E
