# Supplementary material for: Novel Siphoviridae Bacteriophages Infecting Bacteroides uniformis Contain Diversity Generating Retroelement
Source: Microorganisms. 2021 Apr 21;9(5):892. doi: 10.3390/microorganisms9050892 (PMC8143477; doi:10.3390/microorganisms9050892)
Supplement: Supplementary file 1 [file microorganisms-09-00892-s001.zip › Table S1_List of Bacteroides strains.xlsx]

## Sheet: List of Bacteroides strains
Strain designation	Identification	Identification method	Strain origin	Used in enrichment experiment	Spot assay results (sample: faecal water)	Host strain for Bacuni phage	Host range experiment - Bacuni phage F1 and F2	Host range experiment - Bacuni phage F4
MB18-32	Bacteroides vulgatus	MALDI-TOF MS* & ANI** (WGS***, Illumina - MiSeq)	stool sample	+	Lysis like zones obtained, plaques could not be further propagated		Negative	Negative
MB18-57	Bacteroides vulgatus	MALDI-TOF MS, ANI (WGS, Illumina - MiSeq)	stool sample	+	Lysis like zones obtained, plaques could not be further propagated		Lysis like zones obtained, plaques could not be further propagated	Lysis like zones obtained, plaques could not be further propagated
MB18-64	Bacteroides vulgatus	MALDI-TOF MS, ANI (WGS, Illumina - MiSeq)	stool sample	+	Lysis like zones obtained, plaques could not be further propagated		Negative	Negative
MB18-61	Bacteroides ovatus	MALDI-TOF MS, ANI (WGS, Illumina - MiSeq)	stool sample	+	Lysis like zones obtained, plaques could not be further propagated		Lysis like zones obtained, plaques could not be further propagated	Lysis like zones obtained, plaques could not be further propagated
MB18-66	Bacteroides finegoldi	MALDI-TOF MS, ANI (WGS, Illumina - MiSeq)	stool sample	+	Negative		Negative	Negative
MB18- 12	Bacteroides uniformis	MALDI-TOF MS, ANI (WGS, Illumina - MiSeq)	stool sample	-	Negative		Negative	Negative
MB18-33	Bacteroides uniformis	MALDI-TOF MS, ANI (WGS, Illumina - MiSeq)	stool sample	+	Clear plaques	F1, F2	Clear plaques	Negative
MB18- 69	Bacteroides uniformis	MALDI-TOF MS, ANI (WGS, Illumina - MiSeq)	stool sample	+	Lysis like zones obtained, plaques could not be further propagated		Negative	Negative
MB18- 74	Bacteroides uniformis	MALDI-TOF MS, ANI (WGS, Illumina - MiSeq)	stool sample	+	Lysis like zones obtained, plaques could not be further propagated		Lysis like zones obtained, plaques could not be further propagated	Negative
MB18- 76	Bacteroides uniformis	MALDI-TOF MS, ANI (WGS, Illumina - MiSeq)	stool sample	+	Lysis like zones obtained, plaques could not be further propagated		Lysis like zones obtained, plaques could not be further propagated	Negative
MB18-78	Bacteroides uniformis	MALDI-TOF MS, ANI (WGS, Illumina - MiSeq)	stool sample	-	Lysis like zones obtained, plaques could not be further propagated		Negative	Negative
MB18- 80	Bacteroides uniformis	MALDI-TOF MS, ANI (WGS, Illumina - MiSeq)	stool sample	+	Clear plaques	F4, F3	Negative	Clear plaques
Strain designation	Identification	Identification method	Strain origin		Spot assay results (sample: purified phages)	Host strain for Bacuni phage	Host range experiment - Bacuni phage F1 and F2	Host range experiment - Bacuni phage F4
MB18- 80 - K	Bacteroides uniformis - K	MALDI-TOF MS, ANI (WGS, Illumina - MiSeq)	MB18-80 derivate obtained after exposure to Bacuni phage F4 (isolated from a plaque)		NA		Negative	Negative
MB18- 80 - PH	Bacteroides uniformis - PH	MALDI-TOF MS, ANI (WGS, Illumina - MiSeq)	MB18-80 derivate obtained after exposure to Bacuni phage F4 (isolated from a plaque)		NA	F1, F2	Clear plaques	Negative
*MALDI-TOF MS: Matrix-assisted laser desorption ionization-time of flight mass spectrometry
**ANI: average nucleotide identity
***WGS: whole genome sequencing
