# Supplementary material for: Novel Siphoviridae Bacteriophages Infecting Bacteroides uniformis Contain Diversity Generating Retroelement
Source: Microorganisms. 2021 Apr 21;9(5):892. doi: 10.3390/microorganisms9050892 (PMC8143477; doi:10.3390/microorganisms9050892)
Supplement: Supplementary file 1 [file microorganisms-09-00892-s001.zip › Table S2 vcontact2 results.xls]

## Sheet: Supplementary table 2 vcontact2
	Genome	Order	Family	Genus	VC	VC Status	Size	VC Subcluster	VC Subcluster Size	Quality	Adj P-value	Topology Confidence Score	Genera in VC	Families in VC	Orders in VC	Genus Confidence Score
0	3P11	Unassigned	Unassigned	Unassigned	0_0	Clustered	2	VC_0_0	2	0.466	0.95008566	0.4428	1	1	1	1.0
1	8POS	Unassigned	Unassigned	Unassigned	0_0	Clustered	2	VC_0_0	2	0.466	0.95008566	0.4428	1	1	1	1.0
2	Achromobacter~phage~83-24	Caudovirales	Siphoviridae	Jwxvirus	8_0	Clustered	2	VC_8_0	2	0.1933	0.95227493	0.1841	1	1	1	1.0
3	Achromobacter~phage~JWAlpha	Caudovirales	Podoviridae	Jwalphavirus	15_1	Clustered	11	VC_15_1	11	0.4766	1.0	0.4766	3	1	1	0.9818
4	Achromobacter~phage~JWX	Caudovirales	Siphoviridae	Jwxvirus	8_0	Clustered	2	VC_8_0	2	0.1933	0.95227493	0.1841	1	1	1	1.0
5	Achromobacter~phage~phiAxp-1	Caudovirales	Siphoviridae	Unassigned	9_0	Clustered	12	VC_9_0	12	0.6996	1.0	0.6996	4	1	1	1.0
6	Achromobacter~phage~phiAxp-3	Caudovirales	Podoviridae	Jwalphavirus	15_1	Clustered	11	VC_15_1	11	0.4766	1.0	0.4766	3	1	1	0.9818
7	Acidianus~bottle-shaped~virus	Unassigned	Ampullaviridae	Ampullavirus	24_0	Clustered	3	VC_24_0	3	1.0	1.0	1.0	1	1	1	1.0
8	Acidianus~bottle-shaped~virus~2	Unassigned	Ampullaviridae	Ampullavirus	24_0	Clustered	3	VC_24_0	3	1.0	1.0	1.0	1	1	1	1.0
9	Acidianus~bottle-shaped~virus~3	Unassigned	Ampullaviridae	Ampullavirus	24_0	Clustered	3	VC_24_0	3	1.0	1.0	1.0	1	1	1	1.0
10	Acidianus~filamentous~virus~3	Ligamenvirales	Lipothrixviridae	Betalipothrixvirus	26_0	Clustered	6	VC_26_0	6	0.9551	0.99993866	0.9551	1	1	1	1.0
11	Acidianus~filamentous~virus~6	Ligamenvirales	Lipothrixviridae	Betalipothrixvirus	26_0	Clustered	6	VC_26_0	6	0.9551	0.99993866	0.9551	1	1	1	1.0
12	Acidianus~filamentous~virus~7	Ligamenvirales	Lipothrixviridae	Betalipothrixvirus	26_0	Clustered	6	VC_26_0	6	0.9551	0.99993866	0.9551	1	1	1	1.0
13	Acidianus~filamentous~virus~8	Ligamenvirales	Lipothrixviridae	Betalipothrixvirus	26_0	Clustered	6	VC_26_0	6	0.9551	0.99993866	0.9551	1	1	1	1.0
14	Acidianus~filamentous~virus~9	Ligamenvirales	Lipothrixviridae	Betalipothrixvirus	26_0	Clustered	6	VC_26_0	6	0.9551	0.99993866	0.9551	1	1	1	1.0
15	Acidianus~spindle-shaped~virus~1	Unassigned	Fuselloviridae	Betafusellovirus	28_0	Clustered	9	VC_28_0	9	0.9088	0.99999774	0.9088	2	1	1	1.0
16	Acinetobacter~phage~AB1	Caudovirales	Myoviridae	Ap22virus	35_0	Clustered	9	VC_35_0	9	0.8624	1.0	0.8624	2	1	1	1.0
17	Acinetobacter~phage~AB3	Caudovirales	Podoviridae	Fri1virus	36_0	Clustered	20	VC_36_0	20	0.9498	1.0	0.9498	2	1	1	1.0
18	Acinetobacter~phage~AP22	Caudovirales	Myoviridae	Ap22virus	35_0	Clustered	9	VC_35_0	9	0.8624	1.0	0.8624	2	1	1	1.0
19	Acinetobacter~phage~AbP2	Caudovirales	Myoviridae	Obolenskvirus	35_0	Clustered	9	VC_35_0	9	0.8624	1.0	0.8624	2	1	1	1.0
20	Acinetobacter~phage~Abp1	Caudovirales	Podoviridae	Fri1virus	36_0	Clustered	20	VC_36_0	20	0.9498	1.0	0.9498	2	1	1	1.0
21	Acinetobacter~phage~Bphi-B1251	Caudovirales	Siphoviridae	Vieuvirus	47_0	Clustered	3	VC_47_0	3	0.8584	0.99188498	0.8515	1	1	1	1.0
22	Acinetobacter~phage~Fri1	Caudovirales	Podoviridae	Fri1virus	36_0	Clustered	20	VC_36_0	20	0.9498	1.0	0.9498	2	1	1	1.0
23	Acinetobacter~phage~IME-AB2	Caudovirales	Myoviridae	Ap22virus	35_0	Clustered	9	VC_35_0	9	0.8624	1.0	0.8624	2	1	1	1.0
24	Acinetobacter~phage~IME200	Caudovirales	Podoviridae	Fri1virus	36_0	Clustered	20	VC_36_0	20	0.9498	1.0	0.9498	2	1	1	1.0
25	Acinetobacter~phage~IME_AB3	Caudovirales	Siphoviridae	Unassigned	9_0	Clustered	12	VC_9_0	12	0.6996	1.0	0.6996	4	1	1	1.0
26	Acinetobacter~phage~LZ35	Caudovirales	Myoviridae	Obolenskvirus	35_0	Clustered	9	VC_35_0	9	0.8624	1.0	0.8624	2	1	1	1.0
27	Acinetobacter~phage~Petty	Caudovirales	Podoviridae	Friunavirus	36_0	Clustered	20	VC_36_0	20	0.9498	1.0	0.9498	2	1	1	1.0
28	Acinetobacter~phage~SH-Ab~15519	Caudovirales	Podoviridae	Friunavirus	36_0	Clustered	20	VC_36_0	20	0.9498	1.0	0.9498	2	1	1	1.0
29	Acinetobacter~phage~WCHABP1	Caudovirales	Myoviridae	Obolenskvirus	35_0	Clustered	9	VC_35_0	9	0.8624	1.0	0.8624	2	1	1	1.0
30	Acinetobacter~phage~WCHABP12	Caudovirales	Myoviridae	Obolenskvirus	35_0	Clustered	9	VC_35_0	9	0.8624	1.0	0.8624	2	1	1	1.0
31	Acinetobacter~phage~WCHABP5	Caudovirales	Podoviridae	Friunavirus	36_0	Clustered	20	VC_36_0	20	0.9498	1.0	0.9498	2	1	1	1.0
32	Acinetobacter~phage~YMC-13-01-C62	Caudovirales	Myoviridae	Ap22virus	35_0	Clustered	9	VC_35_0	9	0.8624	1.0	0.8624	2	1	1	1.0
33	Acinetobacter~phage~YMC11/11/R3177	Caudovirales	Siphoviridae	Vieuvirus	47_0	Clustered	3	VC_47_0	3	0.8584	0.99188498	0.8515	1	1	1	1.0
34	Acinetobacter~phage~YMC11/12/R2315	Caudovirales	Myoviridae	Obolenskvirus	35_0	Clustered	9	VC_35_0	9	0.8624	1.0	0.8624	2	1	1	1.0
35	Acinetobacter~phage~phiAB1	Caudovirales	Podoviridae	Fri1virus	36_0	Clustered	20	VC_36_0	20	0.9498	1.0	0.9498	2	1	1	1.0
36	Acinetobacter~phage~phiAB6	Caudovirales	Podoviridae	Friunavirus	36_0	Clustered	20	VC_36_0	20	0.9498	1.0	0.9498	2	1	1	1.0
37	Acinetobacter~phage~vB_AbaM_Acibel004	Caudovirales	Myoviridae	Unassigned	50_0	Clustered	2	VC_50_0	2	0.1594	0.95281717	0.1519	1	1	1	1.0
38	Acinetobacter~phage~vB_AbaM_phiAbaA1	Caudovirales	Myoviridae	Unassigned	50_0	Clustered	2	VC_50_0	2	0.1594	0.95281717	0.1519	1	1	1	1.0
39	Acinetobacter~phage~vB_AbaP_AS11	Caudovirales	Podoviridae	Friunavirus	36_0	Clustered	20	VC_36_0	20	0.9498	1.0	0.9498	2	1	1	1.0
40	Acinetobacter~phage~vB_AbaP_AS12	Caudovirales	Podoviridae	Friunavirus	36_0	Clustered	20	VC_36_0	20	0.9498	1.0	0.9498	2	1	1	1.0
41	Acinetobacter~phage~vB_AbaP_Acibel007	Caudovirales	Podoviridae	Friunavirus	36_0	Clustered	20	VC_36_0	20	0.9498	1.0	0.9498	2	1	1	1.0
42	Acinetobacter~phage~vB_AbaP_B1	Caudovirales	Podoviridae	Friunavirus	36_0	Clustered	20	VC_36_0	20	0.9498	1.0	0.9498	2	1	1	1.0
43	Acinetobacter~phage~vB_AbaP_B3	Caudovirales	Podoviridae	Friunavirus	36_0	Clustered	20	VC_36_0	20	0.9498	1.0	0.9498	2	1	1	1.0
44	Acinetobacter~phage~vB_AbaP_B5	Caudovirales	Podoviridae	Friunavirus	36_0	Clustered	20	VC_36_0	20	0.9498	1.0	0.9498	2	1	1	1.0
45	Acinetobacter~phage~vB_AbaP_D2	Caudovirales	Podoviridae	Friunavirus	36_0	Clustered	20	VC_36_0	20	0.9498	1.0	0.9498	2	1	1	1.0
46	Acinetobacter~phage~vB_AbaP_PD-6A3	Caudovirales	Podoviridae	Fri1virus	36_0	Clustered	20	VC_36_0	20	0.9498	1.0	0.9498	2	1	1	1.0
47	Acinetobacter~phage~vB_AbaP_PD-AB9	Caudovirales	Podoviridae	Fri1virus	36_0	Clustered	20	VC_36_0	20	0.9498	1.0	0.9498	2	1	1	1.0
48	Acinetobacter~phage~vB_AbaS_Loki	Caudovirales	Siphoviridae	Unassigned	9_0	Clustered	12	VC_9_0	12	0.6996	1.0	0.6996	4	1	1	1.0
49	Acinetobacter~phage~vB_AbaS_TRS1	Caudovirales	Siphoviridae	Vieuvirus	47_0	Clustered	3	VC_47_0	3	0.8584	0.99188498	0.8515	1	1	1	1.0
50	Acinetobacter~phage~vB_ApiP_P1	Caudovirales	Podoviridae	Friunavirus	36_0	Clustered	20	VC_36_0	20	0.9498	1.0	0.9498	2	1	1	1.0
51	Acinetobacter~phage~vB_ApiP_P2	Caudovirales	Podoviridae	Friunavirus	36_0	Clustered	20	VC_36_0	20	0.9498	1.0	0.9498	2	1	1	1.0
52	Aeromonas~phage~AS-gz	Caudovirales	Myoviridae	Tulanevirus	42_1	Clustered	5	VC_42_1	5	0.1077	0.99999993	0.1077	2	1	1	1.0
53	Aeromonas~phage~Aes012	Caudovirales	Myoviridae	Secunda5virus	42_1	Clustered	5	VC_42_1	5	0.1077	0.99999993	0.1077	2	1	1	1.0
54	Aeromonas~phage~Aes508	Caudovirales	Myoviridae	Secunda5virus	42_1	Clustered	5	VC_42_1	5	0.1077	0.99999993	0.1077	2	1	1	1.0
55	Aeromonas~phage~CC2	Caudovirales	Myoviridae	Unassigned	43_0	Clustered	2	VC_43_0	2	0.0364	0.95701978	0.0349	1	1	1	1.0
56	Aeromonas~phage~PX29	Caudovirales	Myoviridae	Unassigned	43_1	Clustered	3	VC_43_1	3	0.0661	0.99855749	0.066	1	1	1	1.0
57	Aeromonas~phage~pAh6-C	Caudovirales	Myoviridae	Unassigned	64_0	Clustered	5	VC_64_0	5	1.0	1.0	1.0	1	1	1	1.0
58	Aeromonas~phage~pIS4-A	Caudovirales	Siphoviridae	Pis4avirus	66_0	Clustered	5	VC_66_0	5	0.664	0.99999991	0.664	2	1	1	1.0
59	Aeromonas~phage~phiAS4	Caudovirales	Myoviridae	Secunda5virus	42_1	Clustered	5	VC_42_1	5	0.1077	0.99999993	0.1077	2	1	1	1.0
60	Aeromonas~phage~phiAS5	Caudovirales	Myoviridae	Unassigned	43_1	Clustered	3	VC_43_1	3	0.0661	0.99855749	0.066	1	1	1	1.0
61	Aeromonas~phage~phiAS7	Caudovirales	Podoviridae	Unassigned	73_0	Clustered	5	VC_73_0	5	0.5127	0.99999992	0.5127	1	1	1	1.0
62	Aeromonas~virus~25	Caudovirales	Myoviridae	Secunda5virus	42_1	Clustered	5	VC_42_1	5	0.1077	0.99999993	0.1077	2	1	1	1.0
63	Aeromonas~virus~31	Caudovirales	Myoviridae	Secunda5virus	42_0	Clustered	2	VC_42_0	2	0.0251	0.94815826	0.0238	2	1	1	1.0
64	Aeromonas~virus~44RR2	Caudovirales	Myoviridae	Biquartavirus	42_0	Clustered	2	VC_42_0	2	0.0251	0.94815826	0.0238	2	1	1	1.0
65	Aeromonas~virus~65	Caudovirales	Myoviridae	Unassigned	43_0	Clustered	2	VC_43_0	2	0.0364	0.95701978	0.0349	1	1	1	1.0
66	Aeromonas~virus~Aeh1	Caudovirales	Myoviridae	Unassigned	43_1	Clustered	3	VC_43_1	3	0.0661	0.99855749	0.066	1	1	1	1.0
67	Aeromonas~virus~phiO18P	Caudovirales	Myoviridae	Hp1virus	76_0	Clustered	7	VC_76_0	7	0.558	1.0	0.558	2	1	1	1.0
68	Aggregatibacter~phage~S1249	Caudovirales	Myoviridae	Unassigned	14_0	Clustered	2	VC_14_0	2	0.5912	0.9374548	0.5543	1	1	1	1.0
69	Agrobacterium~phage~7-7-1	Caudovirales	Myoviridae	Unassigned	77_0	Clustered	3	VC_77_0	3	0.1935	0.98740228	0.191	2	3	2	1.0
70	Alces~alces~faeces~associated~microvirus~MP10~5560	Unassigned	Microviridae	Unassigned	80_0	Clustered	6	VC_80_0	6	0.4882	0.99999998	0.4882	1	1	1	1.0
71	Alces~alces~faeces~associated~microvirus~MP12~5423	Unassigned	Microviridae	Unassigned	79_0	Clustered	12	VC_79_0	12	0.7885	1.0	0.7885	3	1	1	1.0
72	Alces~alces~faeces~associated~microvirus~MP18~4940	Unassigned	Microviridae	Unassigned	80_0	Clustered	6	VC_80_0	6	0.4882	0.99999998	0.4882	1	1	1	1.0
73	Aquamicrobium~phage~P14	Caudovirales	Podoviridae	Aqualcavirus	72_0	Clustered	15	VC_72_0	15	0.7255	1.0	0.7255	6	1	1	1.0
74	Archaeal~BJ1~virus	Caudovirales	Siphoviridae	Unassigned	87_0	Clustered	2	VC_87_0	2	0.8389	0.72985431	0.6123	1	2	2	1.0
75	Arthrobacter~phage~Abidatro	Caudovirales	Siphoviridae	Galaxyvirus	89_0	Clustered	2	VC_89_0	2	0.4638	0.95077717	0.4409	1	1	1	1.0
76	Arthrobacter~phage~Adat	Caudovirales	Podoviridae	Jasminevirus	94_0	Clustered	2	VC_94_0	2	1.0	1.0	1.0	1	1	1	1.0
77	Arthrobacter~phage~Amigo	Caudovirales	Siphoviridae	Amigovirus	95_0	Clustered	2	VC_95_0	2	0.7552	0.89435023	0.6754	1	1	1	1.0
78	Arthrobacter~phage~BarretLemon	Caudovirales	Myoviridae	Marthavirus	97_0	Clustered	8	VC_97_0	8	0.8668	1.0	0.8668	1	1	1	1.0
79	Arthrobacter~phage~Beans	Caudovirales	Myoviridae	Marthavirus	97_0	Clustered	8	VC_97_0	8	0.8668	1.0	0.8668	1	1	1	1.0
80	Arthrobacter~phage~Bennie	Caudovirales	Siphoviridae	Korravirus	88_0	Clustered	9	VC_88_0	9	0.9269	1.0	0.9269	1	1	1	1.0
81	Arthrobacter~phage~Brent	Caudovirales	Myoviridae	Marthavirus	97_0	Clustered	8	VC_97_0	8	0.8668	1.0	0.8668	1	1	1	1.0
82	Arthrobacter~phage~Colucci	Caudovirales	Myoviridae	Radnorvirus	98_0	Clustered	3	VC_98_0	3	0.4652	0.9969722	0.4638	2	1	1	1.0
83	Arthrobacter~phage~DrRobert	Caudovirales	Siphoviridae	Korravirus	88_0	Clustered	9	VC_88_0	9	0.9269	1.0	0.9269	1	1	1	1.0
84	Arthrobacter~phage~Galaxy	Caudovirales	Siphoviridae	Galaxyvirus	89_0	Clustered	2	VC_89_0	2	0.4638	0.95077717	0.4409	1	1	1	1.0
85	Arthrobacter~phage~Glenn	Caudovirales	Siphoviridae	Korravirus	88_0	Clustered	9	VC_88_0	9	0.9269	1.0	0.9269	1	1	1	1.0
86	Arthrobacter~phage~HunterDalle	Caudovirales	Siphoviridae	Korravirus	88_0	Clustered	9	VC_88_0	9	0.9269	1.0	0.9269	1	1	1	1.0
87	Arthrobacter~phage~Jasmine	Caudovirales	Podoviridae	Jasminevirus	94_0	Clustered	2	VC_94_0	2	1.0	1.0	1.0	1	1	1	1.0
88	Arthrobacter~phage~Jawnski	Caudovirales	Myoviridae	Marthavirus	97_0	Clustered	8	VC_97_0	8	0.8668	1.0	0.8668	1	1	1	1.0
89	Arthrobacter~phage~Joann	Caudovirales	Siphoviridae	Korravirus	88_0	Clustered	9	VC_88_0	9	0.9269	1.0	0.9269	1	1	1	1.0
90	Arthrobacter~phage~KellEzio	Caudovirales	Siphoviridae	Kelleziovirus	105_0	Clustered	2	VC_105_0	2	1.0	1.0	1.0	1	1	1	1.0
91	Arthrobacter~phage~Kitkat	Caudovirales	Siphoviridae	Kelleziovirus	105_0	Clustered	2	VC_105_0	2	1.0	1.0	1.0	1	1	1	1.0
92	Arthrobacter~phage~Korra	Caudovirales	Siphoviridae	Korravirus	88_0	Clustered	9	VC_88_0	9	0.9269	1.0	0.9269	1	1	1	1.0
93	Arthrobacter~phage~Martha	Caudovirales	Myoviridae	Marthavirus	97_0	Clustered	8	VC_97_0	8	0.8668	1.0	0.8668	1	1	1	1.0
94	Arthrobacter~phage~Molivia	Caudovirales	Siphoviridae	Amigovirus	95_0	Clustered	2	VC_95_0	2	0.7552	0.89435023	0.6754	1	1	1	1.0
95	Arthrobacter~phage~Piccoletto	Caudovirales	Myoviridae	Marthavirus	97_0	Clustered	8	VC_97_0	8	0.8668	1.0	0.8668	1	1	1	1.0
96	Arthrobacter~phage~Preamble	Caudovirales	Siphoviridae	Korravirus	88_0	Clustered	9	VC_88_0	9	0.9269	1.0	0.9269	1	1	1	1.0
97	Arthrobacter~phage~PrincessTrina	Caudovirales	Myoviridae	Arv1virus	98_0	Clustered	3	VC_98_0	3	0.4652	0.9969722	0.4638	2	1	1	1.0
98	Arthrobacter~phage~Pumancara	Caudovirales	Siphoviridae	Korravirus	88_0	Clustered	9	VC_88_0	9	0.9269	1.0	0.9269	1	1	1	1.0
99	Arthrobacter~phage~Shade	Caudovirales	Myoviridae	Marthavirus	97_0	Clustered	8	VC_97_0	8	0.8668	1.0	0.8668	1	1	1	1.0
100	Arthrobacter~phage~Sonny	Caudovirales	Myoviridae	Marthavirus	97_0	Clustered	8	VC_97_0	8	0.8668	1.0	0.8668	1	1	1	1.0
101	Arthrobacter~phage~Wayne	Caudovirales	Siphoviridae	Korravirus	88_0	Clustered	9	VC_88_0	9	0.9269	1.0	0.9269	1	1	1	1.0
102	Arthrobacter~phage~vB_ArtM-ArV1	Caudovirales	Myoviridae	Arv1virus	98_0	Clustered	3	VC_98_0	3	0.4652	0.9969722	0.4638	2	1	1	1.0
103	Bacillus~phage~AR9	Caudovirales	Myoviridae	Unassigned	109_0	Clustered/Singleton	1	VC_109_0	1	0.0	1.0	0.0	1	1	1	1.0
104	Bacillus~phage~Aurora	Caudovirales	Podoviridae	Salasvirus	57_0	Clustered	4	VC_57_0	4	0.6578	0.99991908	0.6577	1	1	1	1.0
105	Bacillus~phage~BPS10C	Caudovirales	Herelleviridae	Wphvirus	111_1	Clustered	4	VC_111_1	4	0.0708	0.99896716	0.0707	1	2	1	1.0
106	Bacillus~phage~BPS13	Caudovirales	Myoviridae	Wphvirus	111_1	Clustered	4	VC_111_1	4	0.0708	0.99896716	0.0707	1	2	1	1.0
107	Bacillus~phage~Bam35c	Unassigned	Tectiviridae	Betatectivirus	125_0	Clustered	4	VC_125_0	4	1.0	1.0	1.0	1	1	1	1.0
108	Bacillus~phage~Belinda	Caudovirales	Herelleviridae	Wphvirus	111_0	Clustered	12	VC_111_0	12	0.3183	1.0	0.3183	1	2	1	1.0
109	Bacillus~phage~CampHawk	Caudovirales	Myoviridae	Spo1virus	112_0	Clustered	2	VC_112_0	2	0.2624	0.95351478	0.2502	1	1	1	1.0
110	Bacillus~phage~Claudi	Caudovirales	Podoviridae	Salasvirus	57_0	Clustered	4	VC_57_0	4	0.6578	0.99991908	0.6577	1	1	1	1.0
111	Bacillus~phage~DIGNKC	Caudovirales	Herelleviridae	Wphvirus	111_0	Clustered	12	VC_111_0	12	0.3183	1.0	0.3183	1	2	1	1.0
112	Bacillus~phage~DirtyBetty	Caudovirales	Herelleviridae	Wphvirus	111_0	Clustered	12	VC_111_0	12	0.3183	1.0	0.3183	1	2	1	1.0
113	Bacillus~phage~Eyuki	Caudovirales	Herelleviridae	Wphvirus	111_0	Clustered	12	VC_111_0	12	0.3183	1.0	0.3183	1	2	1	1.0
114	Bacillus~phage~Fah	Caudovirales	Siphoviridae	Wbetavirus	127_0	Clustered	3	VC_127_0	3	0.4063	0.99795489	0.4055	1	1	1	1.0
115	Bacillus~phage~GIL16c	Unassigned	Tectiviridae	Betatectivirus	125_0	Clustered	4	VC_125_0	4	1.0	1.0	1.0	1	1	1	1.0
116	Bacillus~phage~Gamma	Caudovirales	Siphoviridae	Wbetavirus	127_0	Clustered	3	VC_127_0	3	0.4063	0.99795489	0.4055	1	1	1	1.0
117	Bacillus~phage~Hakuna	Caudovirales	Myoviridae	Wphvirus	111_0	Clustered	12	VC_111_0	12	0.3183	1.0	0.3183	1	2	1	1.0
118	Bacillus~phage~Kida	Caudovirales	Herelleviridae	Wphvirus	111_0	Clustered	12	VC_111_0	12	0.3183	1.0	0.3183	1	2	1	1.0
119	Bacillus~phage~MG-B1	Caudovirales	Podoviridae	Salasvirus	57_0	Clustered	4	VC_57_0	4	0.6578	0.99991908	0.6577	1	1	1	1.0
120	Bacillus~phage~Megatron	Caudovirales	Myoviridae	Wphvirus	111_0	Clustered	12	VC_111_0	12	0.3183	1.0	0.3183	1	2	1	1.0
121	Bacillus~phage~Mgbh1	Caudovirales	Siphoviridae	Magadivirus	138_0	Clustered	2	VC_138_0	2	0.382	0.93189513	0.356	2	1	1	1.0
122	Bacillus~phage~Nemo	Caudovirales	Herelleviridae	Wphvirus	111_0	Clustered	12	VC_111_0	12	0.3183	1.0	0.3183	1	2	1	1.0
123	Bacillus~phage~Nigalana	Caudovirales	Herelleviridae	Wphvirus	111_0	Clustered	12	VC_111_0	12	0.3183	1.0	0.3183	1	2	1	1.0
124	Bacillus~phage~NotTheCreek	Caudovirales	Herelleviridae	Wphvirus	111_0	Clustered	12	VC_111_0	12	0.3183	1.0	0.3183	1	2	1	1.0
125	Bacillus~phage~PM1	Caudovirales	Siphoviridae	Unassigned	141_0	Clustered	3	VC_141_0	3	0.2735	0.95352973	0.2607	2	1	1	0.6667
126	Bacillus~phage~Page	Caudovirales	Podoviridae	Pagevirus	143_0	Clustered	6	VC_143_0	6	0.9857	0.99996837	0.9857	1	1	1	1.0
127	Bacillus~phage~Palmer	Caudovirales	Podoviridae	Pagevirus	143_0	Clustered	6	VC_143_0	6	0.9857	0.99996837	0.9857	1	1	1	1.0
128	Bacillus~phage~Pascal	Caudovirales	Podoviridae	Pagevirus	143_0	Clustered	6	VC_143_0	6	0.9857	0.99996837	0.9857	1	1	1	1.0
129	Bacillus~phage~Pavlov	Caudovirales	Podoviridae	Pagevirus	143_0	Clustered	6	VC_143_0	6	0.9857	0.99996837	0.9857	1	1	1	1.0
130	Bacillus~phage~Pony	Caudovirales	Podoviridae	Pagevirus	143_0	Clustered	6	VC_143_0	6	0.9857	0.99996837	0.9857	1	1	1	1.0
131	Bacillus~phage~Pookie	Caudovirales	Podoviridae	Pagevirus	143_0	Clustered	6	VC_143_0	6	0.9857	0.99996837	0.9857	1	1	1	1.0
132	Bacillus~phage~SP-15	Caudovirales	Myoviridae	Thornevirus	145_0	Clustered/Singleton	1	VC_145_0	1	0.0	1.0	0.0	1	1	1	1.0
133	Bacillus~phage~SageFayge	Caudovirales	Herelleviridae	Wphvirus	111_0	Clustered	12	VC_111_0	12	0.3183	1.0	0.3183	1	2	1	1.0
134	Bacillus~phage~SalinJah	Caudovirales	Herelleviridae	Wphvirus	111_1	Clustered	4	VC_111_1	4	0.0708	0.99896716	0.0707	1	2	1	1.0
135	Bacillus~phage~Slash	Caudovirales	Siphoviridae	Slashvirus	136_0	Clustered	4	VC_136_0	4	0.9983	0.96662349	0.9649	1	1	1	1.0
136	Bacillus~phage~Stahl	Caudovirales	Siphoviridae	Slashvirus	136_0	Clustered	4	VC_136_0	4	0.9983	0.96662349	0.9649	1	1	1	1.0
137	Bacillus~phage~Staley	Caudovirales	Siphoviridae	Slashvirus	136_0	Clustered	4	VC_136_0	4	0.9983	0.96662349	0.9649	1	1	1	1.0
138	Bacillus~phage~Stills	Caudovirales	Siphoviridae	Slashvirus	136_0	Clustered	4	VC_136_0	4	0.9983	0.96662349	0.9649	1	1	1	1.0
139	Bacillus~phage~Stitch	Caudovirales	Podoviridae	Salasvirus	57_0	Clustered	4	VC_57_0	4	0.6578	0.99991908	0.6577	1	1	1	1.0
140	Bacillus~phage~TP21-L	Caudovirales	Siphoviridae	Tp21virus	132_0	Clustered	2	VC_132_0	2	0.7531	0.89435023	0.6735	1	1	1	1.0
141	Bacillus~phage~W.Ph.	Caudovirales	Myoviridae	Wphvirus	111_1	Clustered	4	VC_111_1	4	0.0708	0.99896716	0.0707	1	2	1	1.0
142	Bacillus~phage~Wip1	Unassigned	Tectiviridae	Betatectivirus	125_0	Clustered	4	VC_125_0	4	1.0	1.0	1.0	1	1	1	1.0
143	Bacillus~phage~Zuko	Caudovirales	Herelleviridae	Wphvirus	111_0	Clustered	12	VC_111_0	12	0.3183	1.0	0.3183	1	2	1	1.0
144	Bacillus~phage~vB_BanS-Tsamsa	Caudovirales	Siphoviridae	Unassigned	113_4	Clustered/Singleton	1	VC_113_4	1	0.0	1.0	0.0	1	1	1	1.0
145	Bacillus~virus~1	Caudovirales	Myoviridae	Svunavirus	137_0	Clustered	2	VC_137_0	2	0.4859	0.94175458	0.4576	1	1	1	1.0
146	Bacillus~virus~250	Caudovirales	Siphoviridae	Cecivirus	1_0	Clustered	2	VC_1_0	2	0.4151	0.94523105	0.3924	1	1	1	1.0
147	Bacillus~virus~AP50	Unassigned	Tectiviridae	Betatectivirus	125_0	Clustered	4	VC_125_0	4	1.0	1.0	1.0	1	1	1	1.0
148	Bacillus~virus~Andromeda	Caudovirales	Siphoviridae	Andromedavirus	153_0	Clustered	8	VC_153_0	8	1.0	1.0	1.0	1	1	1	1.0
149	Bacillus~virus~BMBtp2	Caudovirales	Siphoviridae	Tp21virus	132_0	Clustered	2	VC_132_0	2	0.7531	0.89435023	0.6735	1	1	1	1.0
150	Bacillus~virus~Blastoid	Caudovirales	Siphoviridae	Andromedavirus	153_0	Clustered	8	VC_153_0	8	1.0	1.0	1.0	1	1	1	1.0
151	Bacillus~virus~Curly	Caudovirales	Siphoviridae	Andromedavirus	153_0	Clustered	8	VC_153_0	8	1.0	1.0	1.0	1	1	1	1.0
152	Bacillus~virus~Eoghan	Caudovirales	Siphoviridae	Andromedavirus	153_0	Clustered	8	VC_153_0	8	1.0	1.0	1.0	1	1	1	1.0
153	Bacillus~virus~Finn	Caudovirales	Siphoviridae	Andromedavirus	153_0	Clustered	8	VC_153_0	8	1.0	1.0	1.0	1	1	1	1.0
154	Bacillus~virus~G	Caudovirales	Myoviridae	Unassigned	145_1	Clustered/Singleton	1	VC_145_1	1	0.0	1.0	0.0	1	1	1	1.0
155	Bacillus~virus~Glittering	Caudovirales	Siphoviridae	Andromedavirus	153_0	Clustered	8	VC_153_0	8	1.0	1.0	1.0	1	1	1	1.0
156	Bacillus~virus~IEBH	Caudovirales	Siphoviridae	Cecivirus	1_0	Clustered	2	VC_1_0	2	0.4151	0.94523105	0.3924	1	1	1	1.0
157	Bacillus~virus~Riggi	Caudovirales	Siphoviridae	Andromedavirus	153_0	Clustered	8	VC_153_0	8	1.0	1.0	1.0	1	1	1	1.0
158	Bacillus~virus~SPO1	Caudovirales	Myoviridae	Spo1virus	112_0	Clustered	2	VC_112_0	2	0.2624	0.95351478	0.2502	1	1	1	1.0
159	Bacillus~virus~SPbeta	Caudovirales	Siphoviridae	Spbetavirus	113_0	Clustered/Singleton	1	VC_113_0	1	0.0	1.0	0.0	1	1	1	1.0
160	Bacillus~virus~Taylor	Caudovirales	Siphoviridae	Andromedavirus	153_0	Clustered	8	VC_153_0	8	1.0	1.0	1.0	1	1	1	1.0
161	Bacillus~virus~Wbeta	Caudovirales	Siphoviridae	Wbetavirus	127_0	Clustered	3	VC_127_0	3	0.4063	0.99795489	0.4055	1	1	1	1.0
162	Bacteriophage~APSE-2	Caudovirales	Podoviridae	Unassigned	156_0	Clustered	2	VC_156_0	2	0.1374	0.95142376	0.1308	1	1	1	1.0
163	Bacteriophage~Lily	Caudovirales	Siphoviridae	Lilyvirus	160_0	Clustered	2	VC_160_0	2	0.0584	0.69029442	0.0403	2	2	1	1.0
164	Bacteroides~phage~B124-14	Caudovirales	Siphoviridae	Unassigned	3_0	Clustered	2	VC_3_0	2	0.502	0.94532786	0.4745	1	1	1	1.0
165	Bacteroides~phage~B40-8	Caudovirales	Siphoviridae	Unassigned	3_0	Clustered	2	VC_3_0	2	0.502	0.94532786	0.4745	1	1	1	1.0
166	Bdellovibrio~phage~phiMH2K	Unassigned	Microviridae	Bdellomicrovirus	79_0	Clustered	12	VC_79_0	12	0.7885	1.0	0.7885	3	1	1	1.0
167	Brevibacillus~phage~Abouo	Caudovirales	Myoviridae	Abouovirus	163_0	Clustered	5	VC_163_0	5	0.7731	0.99999969	0.7731	2	1	1	1.0
168	Brevibacillus~phage~Davies	Caudovirales	Myoviridae	Abouovirus	163_0	Clustered	5	VC_163_0	5	0.7731	0.99999969	0.7731	2	1	1	1.0
169	Brevibacillus~phage~Jimmer1	Caudovirales	Myoviridae	Jimmervirus	163_0	Clustered	5	VC_163_0	5	0.7731	0.99999969	0.7731	2	1	1	1.0
170	Brevibacillus~phage~Jimmer2	Caudovirales	Myoviridae	Jimmervirus	163_0	Clustered	5	VC_163_0	5	0.7731	0.99999969	0.7731	2	1	1	1.0
171	Brevibacillus~phage~Osiris	Caudovirales	Myoviridae	Jimmervirus	163_0	Clustered	5	VC_163_0	5	0.7731	0.99999969	0.7731	2	1	1	1.0
172	Brevibacillus~phage~Sundance	Caudovirales	Siphoviridae	Unassigned	113_3	Clustered/Singleton	1	VC_113_3	1	0.0	1.0	0.0	1	1	1	1.0
173	Brucella~phage~BiPBO1	Caudovirales	Siphoviridae	Unassigned	170_0	Clustered	2	VC_170_0	2	0.7422	0.81445332	0.6045	1	1	1	1.0
174	Brucella~phage~Pr	Caudovirales	Podoviridae	Prtbvirus	171_0	Clustered	2	VC_171_0	2	0.8427	0.93376822	0.7869	1	1	1	1.0
175	Brucella~phage~Tb	Caudovirales	Podoviridae	Prtbvirus	171_0	Clustered	2	VC_171_0	2	0.8427	0.93376822	0.7869	1	1	1	1.0
176	Burkholderia~phage~Bcep176	Caudovirales	Siphoviridae	Stanholtvirus	175_0	Clustered	5	VC_175_0	5	0.4598	0.99999992	0.4598	2	1	1	1.0
177	Burkholderia~phage~BcepB1A	Caudovirales	Myoviridae	Unassigned	179_0	Clustered	2	VC_179_0	2	0.0435	0.9517076	0.0414	1	1	1	1.0
178	Burkholderia~phage~JG068	Caudovirales	Podoviridae	Unassigned	72_0	Clustered	15	VC_72_0	15	0.7255	1.0	0.7255	6	1	1	1.0
179	Burkholderia~phage~KL1	Caudovirales	Siphoviridae	Septima3virus	9_0	Clustered	12	VC_9_0	12	0.6996	1.0	0.6996	4	1	1	1.0
180	Burkholderia~phage~KL3	Caudovirales	Myoviridae	Peduovirus	75_0	Clustered	29	VC_75_0	29	0.8383	1.0	0.8383	2	1	1	1.0
181	Burkholderia~phage~KS14	Caudovirales	Myoviridae	Peduovirus	75_0	Clustered	29	VC_75_0	29	0.8383	1.0	0.8383	2	1	1	1.0
182	Burkholderia~phage~KS5	Caudovirales	Myoviridae	Peduovirus	75_0	Clustered	29	VC_75_0	29	0.8383	1.0	0.8383	2	1	1	1.0
183	Burkholderia~phage~KS9	Caudovirales	Siphoviridae	Stanholtvirus	175_0	Clustered	5	VC_175_0	5	0.4598	0.99999992	0.4598	2	1	1	1.0
184	Burkholderia~phage~ST79	Caudovirales	Myoviridae	Peduovirus	75_0	Clustered	29	VC_75_0	29	0.8383	1.0	0.8383	2	1	1	1.0
185	Burkholderia~virus~Bcep1	Caudovirales	Myoviridae	Bcep78virus	74_0	Clustered	4	VC_74_0	4	0.7801	0.99955772	0.7798	1	1	1	1.0
186	Burkholderia~virus~Bcep22	Caudovirales	Podoviridae	Bcep22virus	186_0	Clustered	4	VC_186_0	4	0.7702	0.99994211	0.7702	1	1	1	1.0
187	Burkholderia~virus~Bcep43	Caudovirales	Myoviridae	Bcep78virus	74_0	Clustered	4	VC_74_0	4	0.7801	0.99955772	0.7798	1	1	1	1.0
188	Burkholderia~virus~Bcep781	Caudovirales	Myoviridae	Bcep78virus	74_0	Clustered	4	VC_74_0	4	0.7801	0.99955772	0.7798	1	1	1	1.0
189	Burkholderia~virus~BcepNY3	Caudovirales	Myoviridae	Bcep78virus	74_0	Clustered	4	VC_74_0	4	0.7801	0.99955772	0.7798	1	1	1	1.0
190	Burkholderia~virus~Bcepil02	Caudovirales	Podoviridae	Bcep22virus	186_0	Clustered	4	VC_186_0	4	0.7702	0.99994211	0.7702	1	1	1	1.0
191	Burkholderia~virus~Bcepmigl	Caudovirales	Podoviridae	Bcep22virus	186_0	Clustered	4	VC_186_0	4	0.7702	0.99994211	0.7702	1	1	1	1.0
192	Burkholderia~virus~DC1	Caudovirales	Podoviridae	Bcep22virus	186_0	Clustered	4	VC_186_0	4	0.7702	0.99994211	0.7702	1	1	1	1.0
193	Burkholderia~virus~phi1026b	Caudovirales	Siphoviridae	E125virus	175_0	Clustered	5	VC_175_0	5	0.4598	0.99999992	0.4598	2	1	1	1.0
194	Burkholderia~virus~phi52237	Caudovirales	Myoviridae	P2virus	75_0	Clustered	29	VC_75_0	29	0.8383	1.0	0.8383	2	1	1	1.0
195	Burkholderia~virus~phi6442	Caudovirales	Siphoviridae	E125virus	175_0	Clustered	5	VC_175_0	5	0.4598	0.99999992	0.4598	2	1	1	1.0
196	Burkholderia~virus~phiE122	Caudovirales	Myoviridae	P2virus	75_0	Clustered	29	VC_75_0	29	0.8383	1.0	0.8383	2	1	1	1.0
197	Burkholderia~virus~phiE125	Caudovirales	Siphoviridae	E125virus	175_0	Clustered	5	VC_175_0	5	0.4598	0.99999992	0.4598	2	1	1	1.0
198	Burkholderia~virus~phiE202	Caudovirales	Myoviridae	P2virus	75_0	Clustered	29	VC_75_0	29	0.8383	1.0	0.8383	2	1	1	1.0
199	Campylobacter~phage~CP30A	Caudovirales	Myoviridae	Cp8virus	191_0	Clustered	6	VC_191_0	6	0.8671	0.99999995	0.8671	2	1	1	1.0
200	Campylobacter~phage~PC14	Caudovirales	Myoviridae	Fletchervirus	191_0	Clustered	6	VC_191_0	6	0.8671	0.99999995	0.8671	2	1	1	1.0
201	Campylobacter~phage~vB_CjeM_Los1	Caudovirales	Myoviridae	Fletchervirus	191_0	Clustered	6	VC_191_0	6	0.8671	0.99999995	0.8671	2	1	1	1.0
202	Campylobacter~virus~CP21	Caudovirales	Myoviridae	Cp220virus	192_0	Clustered	4	VC_192_0	4	0.723	0.99990103	0.7229	1	1	1	1.0
203	Campylobacter~virus~CP220	Caudovirales	Myoviridae	Cp220virus	192_0	Clustered	4	VC_192_0	4	0.723	0.99990103	0.7229	1	1	1	1.0
204	Campylobacter~virus~CP81	Caudovirales	Myoviridae	Cp8virus	191_0	Clustered	6	VC_191_0	6	0.8671	0.99999995	0.8671	2	1	1	1.0
205	Campylobacter~virus~CPX	Caudovirales	Myoviridae	Cp8virus	191_0	Clustered	6	VC_191_0	6	0.8671	0.99999995	0.8671	2	1	1	1.0
206	Campylobacter~virus~CPt10	Caudovirales	Myoviridae	Cp220virus	192_0	Clustered	4	VC_192_0	4	0.723	0.99990103	0.7229	1	1	1	1.0
207	Campylobacter~virus~IBB35	Caudovirales	Myoviridae	Cp220virus	192_0	Clustered	4	VC_192_0	4	0.723	0.99990103	0.7229	1	1	1	1.0
208	Campylobacter~virus~NCTC12673	Caudovirales	Myoviridae	Cp8virus	191_0	Clustered	6	VC_191_0	6	0.8671	0.99999995	0.8671	2	1	1	1.0
209	Caulobacter~phage~CcrColossus	Caudovirales	Siphoviridae	Unassigned	84_2	Clustered/Singleton	1	VC_84_2	1	0.0	1.0	0.0	1	1	1	1.0
210	Caulobacter~phage~Percy	Caudovirales	Podoviridae	Aqualcavirus	72_0	Clustered	15	VC_72_0	15	0.7255	1.0	0.7255	6	1	1	1.0
211	Caulobacter~phage~phiCb5	Unassigned	Leviviridae	Unassigned	194_0	Clustered	2	VC_194_0	2	0.0769	0.0	0.0	1	1	1	1.0
212	Caulobacter~virus~Karma	Caudovirales	Siphoviridae	Phicbkvirus	84_0	Clustered	4	VC_84_0	4	0.4827	0.99216025	0.479	1	1	1	1.0
213	Caulobacter~virus~Magneto	Caudovirales	Siphoviridae	Phicbkvirus	84_0	Clustered	4	VC_84_0	4	0.4827	0.99216025	0.479	1	1	1	1.0
214	Caulobacter~virus~Rogue	Caudovirales	Siphoviridae	Phicbkvirus	84_1	Clustered/Singleton	1	VC_84_1	1	0.0	1.0	0.0	1	1	1	1.0
215	Caulobacter~virus~Swift	Caudovirales	Siphoviridae	Phicbkvirus	84_0	Clustered	4	VC_84_0	4	0.4827	0.99216025	0.479	1	1	1	1.0
216	Caulobacter~virus~phiCbK	Caudovirales	Siphoviridae	Phicbkvirus	84_0	Clustered	4	VC_84_0	4	0.4827	0.99216025	0.479	1	1	1	1.0
217	Celeribacter~phage~P12053L	Caudovirales	Podoviridae	Unassigned	196_0	Clustered	2	VC_196_0	2	0.4534	0.93555746	0.4242	1	1	1	1.0
218	Cellulophaga~phage~phi10:1	Caudovirales	Siphoviridae	Unassigned	200_0	Clustered	2	VC_200_0	2	0.5014	0.92263554	0.4627	1	1	1	1.0
219	Cellulophaga~phage~phi12:1	Caudovirales	Siphoviridae	Cba181virus	202_0	Clustered	3	VC_202_0	3	1.0	1.0	1.0	1	1	1	1.0
220	Cellulophaga~phage~phi12:2	Unassigned	Microviridae	Unassigned	203_0	Clustered	2	VC_203_0	2	1.0	1.0	1.0	1	1	1	1.0
221	Cellulophaga~phage~phi12a:1	Unassigned	Microviridae	Unassigned	203_0	Clustered	2	VC_203_0	2	1.0	1.0	1.0	1	1	1	1.0
222	Cellulophaga~phage~phi13:2	Caudovirales	Podoviridae	Unassigned	199_0	Clustered	4	VC_199_0	4	0.9181	0.99976889	0.9179	1	1	1	1.0
223	Cellulophaga~phage~phi17:1	Caudovirales	Siphoviridae	Cba181virus	202_0	Clustered	3	VC_202_0	3	1.0	1.0	1.0	1	1	1	1.0
224	Cellulophaga~phage~phi17:2	Caudovirales	Podoviridae	Cba41virus	201_0	Clustered	2	VC_201_0	2	0.9289	0.91813282	0.8529	1	1	1	1.0
225	Cellulophaga~phage~phi18:1	Caudovirales	Siphoviridae	Cba181virus	202_0	Clustered	3	VC_202_0	3	1.0	1.0	1.0	1	1	1	1.0
226	Cellulophaga~phage~phi18:3	Caudovirales	Podoviridae	Unassigned	199_0	Clustered	4	VC_199_0	4	0.9181	0.99976889	0.9179	1	1	1	1.0
227	Cellulophaga~phage~phi19:1	Caudovirales	Siphoviridae	Unassigned	200_0	Clustered	2	VC_200_0	2	0.5014	0.92263554	0.4627	1	1	1	1.0
228	Cellulophaga~phage~phi19:3	Caudovirales	Podoviridae	Unassigned	199_0	Clustered	4	VC_199_0	4	0.9181	0.99976889	0.9179	1	1	1	1.0
229	Cellulophaga~phage~phi46:3	Caudovirales	Podoviridae	Unassigned	199_0	Clustered	4	VC_199_0	4	0.9181	0.99976889	0.9179	1	1	1	1.0
230	Cellulophaga~phage~phi4:1	Caudovirales	Podoviridae	Cba41virus	201_0	Clustered	2	VC_201_0	2	0.9289	0.91813282	0.8529	1	1	1	1.0
231	Chimpanzee~faeces~associated~microphage~1	Unassigned	Microviridae	Unassigned	80_0	Clustered	6	VC_80_0	6	0.4882	0.99999998	0.4882	1	1	1	1.0
232	Chimpanzee~faeces~associated~microphage~2	Unassigned	Microviridae	Unassigned	80_0	Clustered	6	VC_80_0	6	0.4882	0.99999998	0.4882	1	1	1	1.0
233	Chimpanzee~faeces~associated~microphage~3	Unassigned	Microviridae	Unassigned	80_0	Clustered	6	VC_80_0	6	0.4882	0.99999998	0.4882	1	1	1	1.0
234	Chlamydia~phage~2	Unassigned	Microviridae	Chlamydiamicrovirus	79_0	Clustered	12	VC_79_0	12	0.7885	1.0	0.7885	3	1	1	1.0
235	Chlamydia~phage~4	Unassigned	Microviridae	Chlamydiamicrovirus	79_0	Clustered	12	VC_79_0	12	0.7885	1.0	0.7885	3	1	1	1.0
236	Chlamydia~virus~CPAR39	Unassigned	Microviridae	Chlamydiamicrovirus	79_0	Clustered	12	VC_79_0	12	0.7885	1.0	0.7885	3	1	1	1.0
237	Citrobacter~phage~CF1~ERZ-2017	Caudovirales	Myoviridae	Moonvirus	41_7	Clustered	3	VC_41_7	3	0.0216	0.99743521	0.0216	1	1	1	1.0
238	Citrobacter~phage~CR44b	Caudovirales	Podoviridae	Teseptimavirus	206_0	Clustered	60	VC_206_0	60	0.9832	1.0	0.9832	4	1	1	1.0
239	Citrobacter~phage~CR8	Caudovirales	Podoviridae	Teseptimavirus	206_0	Clustered	60	VC_206_0	60	0.9832	1.0	0.9832	4	1	1	1.0
240	Citrobacter~phage~CVT22	Caudovirales	Podoviridae	Unassigned	195_0	Clustered	4	VC_195_0	4	0.6748	0.99995309	0.6747	1	3	2	1.0
241	Citrobacter~phage~IME-CF2	Caudovirales	Myoviridae	Unassigned	44_1	Clustered	8	VC_44_1	8	0.2301	1.0	0.2301	1	1	1	1.0
242	Citrobacter~phage~Margaery	Caudovirales	Myoviridae	Unassigned	44_1	Clustered	8	VC_44_1	8	0.2301	1.0	0.2301	1	1	1	1.0
243	Citrobacter~phage~Merlin	Caudovirales	Myoviridae	Moonvirus	41_7	Clustered	3	VC_41_7	3	0.0216	0.99743521	0.0216	1	1	1	1.0
244	Citrobacter~phage~Michonne	Caudovirales	Myoviridae	Mooglevirus	23_0	Clustered	25	VC_23_0	25	0.905	1.0	0.905	5	1	1	0.9967
245	Citrobacter~phage~Miller	Caudovirales	Myoviridae	Unassigned	44_1	Clustered	8	VC_44_1	8	0.2301	1.0	0.2301	1	1	1	1.0
246	Citrobacter~phage~Moogle	Caudovirales	Myoviridae	Mooglevirus	23_0	Clustered	25	VC_23_0	25	0.905	1.0	0.905	5	1	1	0.9967
247	Citrobacter~phage~Moon	Caudovirales	Myoviridae	Moonvirus	41_7	Clustered	3	VC_41_7	3	0.0216	0.99743521	0.0216	1	1	1	1.0
248	Citrobacter~phage~Mordin	Caudovirales	Myoviridae	Mooglevirus	23_0	Clustered	25	VC_23_0	25	0.905	1.0	0.905	5	1	1	0.9967
249	Citrobacter~phage~SH1	Caudovirales	Podoviridae	Teseptimavirus	206_0	Clustered	60	VC_206_0	60	0.9832	1.0	0.9832	4	1	1	1.0
250	Citrobacter~phage~SH2	Caudovirales	Podoviridae	Teseptimavirus	206_0	Clustered	60	VC_206_0	60	0.9832	1.0	0.9832	4	1	1	1.0
251	Citrobacter~phage~SH3	Caudovirales	Podoviridae	Teseptimavirus	206_0	Clustered	60	VC_206_0	60	0.9832	1.0	0.9832	4	1	1	1.0
252	Citrobacter~phage~SH4	Caudovirales	Podoviridae	Teseptimavirus	206_0	Clustered	60	VC_206_0	60	0.9832	1.0	0.9832	4	1	1	1.0
253	Citrobacter~phage~phiCFP-1	Caudovirales	Podoviridae	Teseptimavirus	206_0	Clustered	60	VC_206_0	60	0.9832	1.0	0.9832	4	1	1	1.0
254	Citrobacter~phage~vB_CfrM_CfP1	Caudovirales	Myoviridae	Unassigned	44_1	Clustered	8	VC_44_1	8	0.2301	1.0	0.2301	1	1	1	1.0
255	Citrobacter~virus~Stevie	Caudovirales	Siphoviridae	Tlsvirus	69_0	Clustered	32	VC_69_0	32	0.9801	1.0	0.9801	10	1	1	0.9435
256	Clavibacter~phage~CMP1	Caudovirales	Siphoviridae	Cimpunavirus	96_0	Clustered	3	VC_96_0	3	0.5813	0.95335502	0.5542	3	1	1	1.0
257	Clavibacter~phage~CN1A	Caudovirales	Siphoviridae	Cinunavirus	96_0	Clustered	3	VC_96_0	3	0.5813	0.95335502	0.5542	3	1	1	1.0
258	Clostridium~phage~CDMH1	Caudovirales	Myoviridae	Lubbockvirus	124_0	Clustered	4	VC_124_0	4	0.3341	0.99998002	0.3341	2	1	1	1.0
259	Clostridium~phage~PhiS63	Caudovirales	Siphoviridae	Unassigned	133_0	Clustered	3	VC_133_0	3	0.3064	0.99670943	0.3054	1	1	1	1.0
260	Clostridium~phage~phi3626	Caudovirales	Siphoviridae	Unassigned	133_0	Clustered	3	VC_133_0	3	0.3064	0.99670943	0.3054	1	1	1	1.0
261	Clostridium~phage~phi8074-B1	Caudovirales	Siphoviridae	Unassigned	115_0	Clustered	3	VC_115_0	3	0.4652	0.99315978	0.4621	1	1	1	1.0
262	Clostridium~phage~phiCD111	Caudovirales	Siphoviridae	Unassigned	212_0	Clustered	3	VC_212_0	3	0.5514	0.99756875	0.5501	1	1	1	1.0
263	Clostridium~phage~phiCD146	Caudovirales	Siphoviridae	Unassigned	212_0	Clustered	3	VC_212_0	3	0.5514	0.99756875	0.5501	1	1	1	1.0
264	Clostridium~phage~phiCD38-2	Caudovirales	Siphoviridae	Unassigned	212_0	Clustered	3	VC_212_0	3	0.5514	0.99756875	0.5501	1	1	1	1.0
265	Clostridium~phage~phiCD481-1	Caudovirales	Myoviridae	Unassigned	213_0	Clustered	5	VC_213_0	5	0.5706	0.99999985	0.5706	1	1	1	1.0
266	Clostridium~phage~phiCD505	Caudovirales	Myoviridae	Lubbockvirus	124_2	Clustered	3	VC_124_2	3	0.2476	0.99791663	0.247	2	1	1	1.0
267	Clostridium~phage~phiCD506	Caudovirales	Myoviridae	Unassigned	213_0	Clustered	5	VC_213_0	5	0.5706	0.99999985	0.5706	1	1	1	1.0
268	Clostridium~phage~phiCDHM11	Caudovirales	Myoviridae	Unassigned	213_0	Clustered	5	VC_213_0	5	0.5706	0.99999985	0.5706	1	1	1	1.0
269	Clostridium~phage~phiCDHM13	Caudovirales	Myoviridae	Unassigned	213_0	Clustered	5	VC_213_0	5	0.5706	0.99999985	0.5706	1	1	1	1.0
270	Clostridium~phage~phiCDHM19	Caudovirales	Myoviridae	Lubbockvirus	124_1	Clustered	2	VC_124_1	2	0.1155	0.94990514	0.1097	2	1	1	1.0
271	Clostridium~phage~phiCP13O	Caudovirales	Siphoviridae	Unassigned	215_0	Clustered	4	VC_215_0	4	1.0	1.0	1.0	1	1	1	1.0
272	Clostridium~phage~phiCP26F	Caudovirales	Siphoviridae	Unassigned	215_0	Clustered	4	VC_215_0	4	1.0	1.0	1.0	1	1	1	1.0
273	Clostridium~phage~phiCP34O	Caudovirales	Siphoviridae	Unassigned	215_0	Clustered	4	VC_215_0	4	1.0	1.0	1.0	1	1	1	1.0
274	Clostridium~phage~phiCP39-O	Caudovirales	Siphoviridae	Unassigned	215_0	Clustered	4	VC_215_0	4	1.0	1.0	1.0	1	1	1	1.0
275	Clostridium~phage~phiCP7R	Caudovirales	Podoviridae	Unassigned	214_0	Clustered	3	VC_214_0	3	0.8041	0.9595722	0.7716	1	1	1	1.0
276	Clostridium~phage~phiCPV4	Caudovirales	Podoviridae	Unassigned	214_0	Clustered	3	VC_214_0	3	0.8041	0.9595722	0.7716	1	1	1	1.0
277	Clostridium~phage~phiCT19406A	Caudovirales	Myoviridae	Unassigned	2_0	Clustered	2	VC_2_0	2	0.4383	0.9410422	0.4124	1	1	1	1.0
278	Clostridium~phage~phiCT19406B	Caudovirales	Siphoviridae	Unassigned	134_0	Clustered	3	VC_134_0	3	0.4592	0.99791548	0.4582	1	1	1	1.0
279	Clostridium~phage~phiCT453B	Caudovirales	Siphoviridae	Unassigned	134_0	Clustered	3	VC_134_0	3	0.4592	0.99791548	0.4582	1	1	1	1.0
280	Clostridium~phage~phiCTC2A	Caudovirales	Myoviridae	Unassigned	2_0	Clustered	2	VC_2_0	2	0.4383	0.9410422	0.4124	1	1	1	1.0
281	Clostridium~phage~phiCTC2B	Caudovirales	Siphoviridae	Unassigned	134_0	Clustered	3	VC_134_0	3	0.4592	0.99791548	0.4582	1	1	1	1.0
282	Clostridium~phage~phiCTP1	Caudovirales	Siphoviridae	Unassigned	115_0	Clustered	3	VC_115_0	3	0.4652	0.99315978	0.4621	1	1	1	1.0
283	Clostridium~phage~phiMMP01	Caudovirales	Myoviridae	Lubbockvirus	124_0	Clustered	4	VC_124_0	4	0.3341	0.99998002	0.3341	2	1	1	1.0
284	Clostridium~phage~phiMMP02	Caudovirales	Myoviridae	Lubbockvirus	124_2	Clustered	3	VC_124_2	3	0.2476	0.99791663	0.247	2	1	1	1.0
285	Clostridium~phage~phiMMP03	Caudovirales	Myoviridae	Lubbockvirus	124_0	Clustered	4	VC_124_0	4	0.3341	0.99998002	0.3341	2	1	1	1.0
286	Clostridium~phage~phiMMP04	Caudovirales	Myoviridae	Unassigned	213_0	Clustered	5	VC_213_0	5	0.5706	0.99999985	0.5706	1	1	1	1.0
287	Clostridium~phage~phiSM101	Caudovirales	Siphoviridae	Unassigned	133_0	Clustered	3	VC_133_0	3	0.3064	0.99670943	0.3054	1	1	1	1.0
288	Clostridium~phage~phiZP2	Caudovirales	Podoviridae	Unassigned	214_0	Clustered	3	VC_214_0	3	0.8041	0.9595722	0.7716	1	1	1	1.0
289	Clostridium~virus~phiC2	Caudovirales	Myoviridae	Cd119virus	124_0	Clustered	4	VC_124_0	4	0.3341	0.99998002	0.3341	2	1	1	1.0
290	Clostridium~virus~phiCD119	Caudovirales	Myoviridae	Cd119virus	124_1	Clustered	2	VC_124_1	2	0.1155	0.94990514	0.1097	2	1	1	1.0
291	Clostridium~virus~phiCD27	Caudovirales	Myoviridae	Cd119virus	124_2	Clustered	3	VC_124_2	3	0.2476	0.99791663	0.247	2	1	1	1.0
292	Corynebacterium~phage~C3PO	Caudovirales	Siphoviridae	Ceetrepovirus	216_0	Clustered	3	VC_216_0	3	0.6702	0.99445022	0.6664	1	1	1	1.0
293	Corynebacterium~phage~Darwin	Caudovirales	Siphoviridae	Ceetrepovirus	216_0	Clustered	3	VC_216_0	3	0.6702	0.99445022	0.6664	1	1	1	1.0
294	Corynebacterium~phage~Poushou	Caudovirales	Siphoviridae	Poushouvirus	218_0	Clustered	2	VC_218_0	2	0.2674	0.91237788	0.244	2	1	1	1.0
295	Corynebacterium~phage~Zion	Caudovirales	Siphoviridae	Ceetrepovirus	216_0	Clustered	3	VC_216_0	3	0.6702	0.99445022	0.6664	1	1	1	1.0
296	Cronobacter~phage~CR5	Caudovirales	Myoviridae	Unassigned	224_0	Clustered	3	VC_224_0	3	0.1102	0.998289	0.11	1	1	1	1.0
297	Cronobacter~phage~Dev-CD-23823	Caudovirales	Podoviridae	Unassigned	73_0	Clustered	5	VC_73_0	5	0.5127	0.99999992	0.5127	1	1	1	1.0
298	Cronobacter~phage~Dev2	Caudovirales	Podoviridae	Teseptimavirus	206_0	Clustered	60	VC_206_0	60	0.9832	1.0	0.9832	4	1	1	1.0
299	Cronobacter~phage~S13	Caudovirales	Myoviridae	Unassigned	43_2	Clustered/Singleton	1	VC_43_2	1	0.0	1.0	0.0	1	1	1	1.0
300	Cronobacter~phage~vB_CsaM_GAP161	Caudovirales	Myoviridae	Unassigned	44_1	Clustered	8	VC_44_1	8	0.2301	1.0	0.2301	1	1	1	1.0
301	Cronobacter~phage~vB_CsaM_GAP32	Caudovirales	Myoviridae	Eneladusvirus	78_2	Clustered/Singleton	1	VC_78_2	1	0.0	1.0	0.0	1	1	1	1.0
302	Cronobacter~phage~vB_CsaP_GAP52	Caudovirales	Podoviridae	Unassigned	230_0	Clustered	2	VC_230_0	2	0.1614	0.95213171	0.1536	1	1	1	1.0
303	Cronobacter~phage~vB_CskP_GAP227	Caudovirales	Podoviridae	Unassigned	73_0	Clustered	5	VC_73_0	5	0.5127	0.99999992	0.5127	1	1	1	1.0
304	Cronobacter~virus~Esp2949-1	Caudovirales	Siphoviridae	Unassigned	69_0	Clustered	32	VC_69_0	32	0.9801	1.0	0.9801	10	1	1	0.9435
305	Cyanophage~9515-10a	Caudovirales	Podoviridae	Unassigned	207_0	Clustered	19	VC_207_0	19	0.9054	1.0	0.9054	1	1	1	1.0
306	Cyanophage~KBS-P-1A	Caudovirales	Podoviridae	Unassigned	207_0	Clustered	19	VC_207_0	19	0.9054	1.0	0.9054	1	1	1	1.0
307	Cyanophage~MED4-117	Unassigned	Unassigned	Unassigned	232_0	Clustered	2	VC_232_0	2	0.7663	0.72985431	0.5593	1	2	2	1.0
308	Cyanophage~NATL1A-7	Caudovirales	Podoviridae	Unassigned	207_0	Clustered	19	VC_207_0	19	0.9054	1.0	0.9054	1	1	1	1.0
309	Cyanophage~NATL2A-133	Caudovirales	Podoviridae	Unassigned	207_0	Clustered	19	VC_207_0	19	0.9054	1.0	0.9054	1	1	1	1.0
310	Cyanophage~P-RSM1	Caudovirales	Myoviridae	Unassigned	32_29	Clustered	2	VC_32_29	2	0.0154	0.94040411	0.0145	1	1	1	1.0
311	Cyanophage~P-RSM6	Caudovirales	Myoviridae	Unassigned	32_11	Clustered/Singleton	1	VC_32_11	1	0.0	1.0	0.0	1	1	1	1.0
312	Cyanophage~P-SSP2	Caudovirales	Podoviridae	Unassigned	207_0	Clustered	19	VC_207_0	19	0.9054	1.0	0.9054	1	1	1	1.0
313	Cyanophage~P-TIM40	Caudovirales	Myoviridae	Unassigned	32_22	Clustered/Singleton	1	VC_32_22	1	0.0	1.0	0.0	1	1	1	1.0
314	Cyanophage~PP	Caudovirales	Podoviridae	Unassigned	85_0	Clustered	2	VC_85_0	2	0.5766	0.86822376	0.5006	1	1	1	1.0
315	Cyanophage~PSS2	Caudovirales	Siphoviridae	Unassigned	233_0	Clustered	2	VC_233_0	2	0.825	0.87921671	0.7254	1	1	1	1.0
316	Cyanophage~S-RIM32	Caudovirales	Myoviridae	Unassigned	32_16	Clustered/Singleton	1	VC_32_16	1	0.0	1.0	0.0	1	1	1	1.0
317	Cyanophage~S-RIM50	Caudovirales	Myoviridae	Unassigned	32_3	Clustered	2	VC_32_3	2	0.0141	0.89716925	0.0126	1	1	1	1.0
318	Cyanophage~SS120-1	Caudovirales	Podoviridae	Unassigned	207_0	Clustered	19	VC_207_0	19	0.9054	1.0	0.9054	1	1	1	1.0
319	Cyanophage~Syn30	Caudovirales	Myoviridae	Unassigned	32_1	Clustered/Singleton	1	VC_32_1	1	0.0	1.0	0.0	1	1	1	1.0
320	Deep-sea~thermophilic~phage~D6E	Unassigned	Unassigned	Unassigned	131_0	Clustered	2	VC_131_0	2	0.3259	0.93865445	0.3059	1	2	2	1.0
321	Delftia~phage~IME-DE1	Caudovirales	Podoviridae	Teseptimavirus	206_0	Clustered	60	VC_206_0	60	0.9832	1.0	0.9832	4	1	1	1.0
322	Dickeya~phage~RC-2014	Caudovirales	Ackermannviridae	Limestonevirus	33_1	Clustered	21	VC_33_1	21	0.8138	1.0	0.8138	5	1	1	0.819
323	Dickeya~virus~Limestone	Caudovirales	Ackermannviridae	Limestonevirus	33_1	Clustered	21	VC_33_1	21	0.8138	1.0	0.8138	5	1	1	0.819
324	Dinoroseobacter~phage~DFL12phi1	Caudovirales	Podoviridae	Dfl12virus	18_0	Clustered	4	VC_18_0	4	0.1924	0.99998272	0.1923	2	1	1	1.0
325	Ecterococcus~phage~vB_EfaS_AL3	Caudovirales	Siphoviridae	Efquatrovirus	235_0	Clustered	16	VC_235_0	16	0.8868	1.0	0.8868	1	1	1	1.0
326	Edwardsiella~phage~KF-1	Caudovirales	Podoviridae	Kf1virus	237_0	Clustered	3	VC_237_0	3	1.0	1.0	1.0	2	1	1	1.0
327	Edwardsiella~phage~MSW-3	Caudovirales	Myoviridae	Msw3virus	70_0	Clustered	8	VC_70_0	8	0.8477	1.0	0.8477	3	1	1	0.7857
328	Edwardsiella~phage~PEi20	Caudovirales	Myoviridae	Unassigned	41_2	Clustered/Singleton	1	VC_41_2	1	0.0	1.0	0.0	1	1	1	1.0
329	Edwardsiella~phage~PEi21	Caudovirales	Myoviridae	Msw3virus	70_0	Clustered	8	VC_70_0	8	0.8477	1.0	0.8477	3	1	1	0.7857
330	Edwardsiella~phage~eiAU	Caudovirales	Siphoviridae	Eiauvirus	188_0	Clustered	2	VC_188_0	2	0.1162	0.95442033	0.1109	1	1	1	1.0
331	Edwardsiella~phage~eiAU-183	Caudovirales	Siphoviridae	Eiauvirus	188_0	Clustered	2	VC_188_0	2	0.1162	0.95442033	0.1109	1	1	1	1.0
332	Enterobacter~phage~Arya	Caudovirales	Myoviridae	Jilinvirus	67_0	Clustered	5	VC_67_0	5	0.3462	0.99999995	0.3462	2	1	1	1.0
333	Enterobacter~phage~CC31	Caudovirales	Myoviridae	Cc31virus	41_8	Clustered	2	VC_41_8	2	0.0104	0.94825285	0.0099	1	1	1	1.0
334	Enterobacter~phage~E-2	Caudovirales	Podoviridae	Teseptimavirus	206_0	Clustered	60	VC_206_0	60	0.9832	1.0	0.9832	4	1	1	1.0
335	Enterobacter~phage~E-3	Caudovirales	Podoviridae	Teseptimavirus	206_0	Clustered	60	VC_206_0	60	0.9832	1.0	0.9832	4	1	1	1.0
336	Enterobacter~phage~EcP1	Caudovirales	Podoviridae	Unassigned	19_0	Clustered	4	VC_19_0	4	0.1841	0.99998272	0.1841	2	1	1	1.0
337	Enterobacter~phage~Ec_L1	Caudovirales	Siphoviridae	Eclunavirus	69_0	Clustered	32	VC_69_0	32	0.9801	1.0	0.9801	10	1	1	0.9435
338	Enterobacter~phage~Enc34	Caudovirales	Siphoviridae	Chivirus	22_0	Clustered	11	VC_22_0	11	0.7938	1.0	0.7938	1	1	1	1.0
339	Enterobacter~phage~PG7	Caudovirales	Myoviridae	Cc31virus	41_8	Clustered	2	VC_41_8	2	0.0104	0.94825285	0.0099	1	1	1	1.0
340	Enterobacter~phage~Tyrion	Caudovirales	Podoviridae	Uetakevirus	155_0	Clustered	5	VC_155_0	5	0.6913	0.99999946	0.6913	2	1	1	1.0
341	Enterobacter~phage~phiEap-1	Caudovirales	Podoviridae	Przondovirus	206_0	Clustered	60	VC_206_0	60	0.9832	1.0	0.9832	4	1	1	1.0
342	Enterobacter~phage~phiEap-2	Caudovirales	Siphoviridae	Cornellvirus	56_0	Clustered	23	VC_56_0	23	0.8413	1.0	0.8413	5	1	1	1.0
343	Enterobacter~phage~phiEap-3	Caudovirales	Myoviridae	Kp15virus	44_0	Clustered	6	VC_44_0	6	0.1523	1.0	0.1523	2	1	1	1.0
344	Enterobacteria~phage~13a	Caudovirales	Podoviridae	Teseptimavirus	206_0	Clustered	60	VC_206_0	60	0.9832	1.0	0.9832	4	1	1	1.0
345	Enterobacteria~phage~285P	Caudovirales	Podoviridae	Teseptimavirus	206_0	Clustered	60	VC_206_0	60	0.9832	1.0	0.9832	4	1	1	1.0
346	Enterobacteria~phage~933W	Caudovirales	Podoviridae	Nona33virus	187_1	Clustered	14	VC_187_1	14	0.5783	1.0	0.5783	5	1	1	0.8901
347	Enterobacteria~phage~9g	Caudovirales	Siphoviridae	Nonagvirus	11_1	Clustered	6	VC_11_1	6	0.4875	1.0	0.4875	2	1	1	1.0
348	Enterobacteria~phage~BA14	Caudovirales	Podoviridae	Teseptimavirus	206_0	Clustered	60	VC_206_0	60	0.9832	1.0	0.9832	4	1	1	1.0
349	Enterobacteria~phage~Bp7	Caudovirales	Myoviridae	Js98virus	41_1	Clustered	8	VC_41_1	8	0.0724	1.0	0.0724	2	1	1	0.9643
350	Enterobacteria~phage~C-1~INW-2012	Unassigned	Leviviridae	Levivirus	193_0	Clustered	4	VC_193_0	4	0.6383	0.99999712	0.6383	1	1	1	1.0
351	Enterobacteria~phage~EcoDS1	Caudovirales	Podoviridae	Teseptimavirus	206_0	Clustered	60	VC_206_0	60	0.9832	1.0	0.9832	4	1	1	1.0
352	Enterobacteria~phage~G4	Unassigned	Microviridae	G4microvirus	239_0	Clustered	8	VC_239_0	8	0.9623	0.99999117	0.9623	4	1	1	1.0
353	Enterobacteria~phage~GEC-3S	Caudovirales	Myoviridae	Krischvirus	45_0	Clustered	5	VC_45_0	5	0.1267	0.99999997	0.1267	2	1	1	1.0
354	Enterobacteria~phage~HK106	Caudovirales	Siphoviridae	Hk97virus	169_0	Clustered	13	VC_169_0	13	0.4182	1.0	0.4182	2	1	1	1.0
355	Enterobacteria~phage~HK140	Caudovirales	Siphoviridae	Hendrixvirus	169_0	Clustered	13	VC_169_0	13	0.4182	1.0	0.4182	2	1	1	1.0
356	Enterobacteria~phage~Hgal1	Unassigned	Leviviridae	Levivirus	193_0	Clustered	4	VC_193_0	4	0.6383	0.99999712	0.6383	1	1	1	1.0
357	Enterobacteria~phage~ID18~sensu~lato	Unassigned	Microviridae	G4microvirus	239_0	Clustered	8	VC_239_0	8	0.9623	0.99999117	0.9623	4	1	1	1.0
358	Enterobacteria~phage~ID2~Moscow/ID/2001	Unassigned	Microviridae	G4microvirus	239_0	Clustered	8	VC_239_0	8	0.9623	0.99999117	0.9623	4	1	1	1.0
359	Enterobacteria~phage~IME08	Caudovirales	Myoviridae	Js98virus	41_1	Clustered	8	VC_41_1	8	0.0724	1.0	0.0724	2	1	1	0.9643
360	Enterobacteria~phage~If1	Unassigned	Inoviridae	Unassigned	243_0	Clustered	3	VC_243_0	3	0.7184	0.9639009	0.6924	2	1	1	1.0
361	Enterobacteria~phage~JS10	Caudovirales	Myoviridae	Js98virus	41_1	Clustered	8	VC_41_1	8	0.0724	1.0	0.0724	2	1	1	0.9643
362	Enterobacteria~phage~JenK1	Caudovirales	Siphoviridae	Nonagvirus	11_1	Clustered	6	VC_11_1	6	0.4875	1.0	0.4875	2	1	1	1.0
363	Enterobacteria~phage~JenP1	Caudovirales	Siphoviridae	Nonagvirus	11_1	Clustered	6	VC_11_1	6	0.4875	1.0	0.4875	2	1	1	1.0
364	Enterobacteria~phage~JenP2	Caudovirales	Siphoviridae	Nonagvirus	11_1	Clustered	6	VC_11_1	6	0.4875	1.0	0.4875	2	1	1	1.0
365	Enterobacteria~phage~K1F	Caudovirales	Podoviridae	Teseptimavirus	206_0	Clustered	60	VC_206_0	60	0.9832	1.0	0.9832	4	1	1	1.0
366	Enterobacteria~phage~M	Unassigned	Leviviridae	Levivirus	193_0	Clustered	4	VC_193_0	4	0.6383	0.99999712	0.6383	1	1	1	1.0
367	Enterobacteria~phage~P88	Caudovirales	Myoviridae	Peduovirus	75_0	Clustered	29	VC_75_0	29	0.8383	1.0	0.8383	2	1	1	1.0
368	Enterobacteria~phage~PR4	Unassigned	Tectiviridae	Alphatectivirus	244_0	Clustered	2	VC_244_0	2	0.9112	0.76024994	0.6928	1	1	1	1.0
369	Enterobacteria~phage~PRD1	Unassigned	Tectiviridae	Alphatectivirus	244_0	Clustered	2	VC_244_0	2	0.9112	0.76024994	0.6928	1	1	1	1.0
370	Enterobacteria~phage~Phi1	Caudovirales	Myoviridae	Rb49virus	45_0	Clustered	5	VC_45_0	5	0.1267	0.99999997	0.1267	2	1	1	1.0
371	Enterobacteria~phage~RB27	Caudovirales	Myoviridae	Tequatrovirus	41_5	Clustered	32	VC_41_5	32	0.3565	1.0	0.3565	2	1	1	0.996
372	Enterobacteria~phage~RB49	Caudovirales	Myoviridae	Rb49virus	45_0	Clustered	5	VC_45_0	5	0.1267	0.99999997	0.1267	2	1	1	1.0
373	Enterobacteria~phage~RB51	Caudovirales	Myoviridae	Tequatrovirus	41_5	Clustered	32	VC_41_5	32	0.3565	1.0	0.3565	2	1	1	0.996
374	Enterobacteria~phage~RB68	Caudovirales	Myoviridae	Tequatrovirus	41_5	Clustered	32	VC_41_5	32	0.3565	1.0	0.3565	2	1	1	0.996
375	Enterobacteria~phage~RB69	Caudovirales	Myoviridae	Rb69virus	41_0	Clustered	9	VC_41_0	9	0.0691	1.0	0.0691	2	1	1	1.0
376	Enterobacteria~phage~SP	Unassigned	Leviviridae	Allolevivirus	39_0	Clustered	3	VC_39_0	3	0.8247	0.97657291	0.8054	1	1	1	1.0
377	Enterobacteria~phage~ST104	Caudovirales	Podoviridae	Lederbergvirus	157_0	Clustered	16	VC_157_0	16	0.5224	1.0	0.5224	2	1	1	0.8833
378	Enterobacteria~phage~Sf101	Caudovirales	Podoviridae	Lederbergvirus	157_0	Clustered	16	VC_157_0	16	0.5224	1.0	0.5224	2	1	1	0.8833
379	Enterobacteria~phage~SfV	Caudovirales	Myoviridae	Unassigned	159_0	Clustered	6	VC_159_0	6	0.6222	1.0	0.6222	1	1	1	1.0
380	Enterobacteria~phage~St-1	Unassigned	Microviridae	Alpha3microvirus	239_0	Clustered	8	VC_239_0	8	0.9623	0.99999117	0.9623	4	1	1	1.0
381	Enterobacteria~phage~T3	Caudovirales	Podoviridae	Teseptimavirus	206_0	Clustered	60	VC_206_0	60	0.9832	1.0	0.9832	4	1	1	1.0
382	Enterobacteria~phage~T7	Caudovirales	Podoviridae	T7virus	206_0	Clustered	60	VC_206_0	60	0.9832	1.0	0.9832	4	1	1	1.0
383	Enterobacteria~phage~UAB_Phi20	Caudovirales	Podoviridae	Lederbergvirus	157_0	Clustered	16	VC_157_0	16	0.5224	1.0	0.5224	2	1	1	0.8833
384	Enterobacteria~phage~UAB_Phi78	Caudovirales	Podoviridae	Zindervirus	245_0	Clustered	15	VC_245_0	15	1.0	1.0	1.0	2	1	1	1.0
385	Enterobacteria~phage~VT2-Sakai	Caudovirales	Podoviridae	Traversvirus	187_1	Clustered	14	VC_187_1	14	0.5783	1.0	0.5783	5	1	1	0.8901
386	Enterobacteria~phage~VT2phi_272	Caudovirales	Podoviridae	Oslovirus	187_1	Clustered	14	VC_187_1	14	0.5783	1.0	0.5783	5	1	1	0.8901
387	Enterobacteria~phage~WA13~sensu~lato	Unassigned	Microviridae	Alphatrevirus	239_0	Clustered	8	VC_239_0	8	0.9623	0.99999117	0.9623	4	1	1	1.0
388	Enterobacteria~phage~alpha3	Unassigned	Microviridae	Alpha3microvirus	239_0	Clustered	8	VC_239_0	8	0.9623	0.99999117	0.9623	4	1	1	1.0
389	Enterobacteria~phage~fd	Unassigned	Inoviridae	Inovirus	243_0	Clustered	3	VC_243_0	3	0.7184	0.9639009	0.6924	2	1	1	1.0
390	Enterobacteria~phage~fiAA91-ss	Caudovirales	Myoviridae	Peduovirus	75_0	Clustered	29	VC_75_0	29	0.8383	1.0	0.8383	2	1	1	1.0
391	Enterobacteria~phage~mEp235	Caudovirales	Siphoviridae	Hendrixvirus	169_0	Clustered	13	VC_169_0	13	0.4182	1.0	0.4182	2	1	1	1.0
392	Enterobacteria~phage~phi92	Caudovirales	Myoviridae	Unassigned	54_0	Clustered	2	VC_54_0	2	0.1611	0.95399842	0.1537	1	1	1	1.0
393	Enterobacteria~phage~phiEcoM-GJ1	Caudovirales	Myoviridae	Unassigned	64_0	Clustered	5	VC_64_0	5	1.0	1.0	1.0	1	1	1	1.0
394	Enterobacteria~phage~phiP27	Caudovirales	Myoviridae	Unassigned	159_0	Clustered	6	VC_159_0	6	0.6222	1.0	0.6222	1	1	1	1.0
395	Enterobacteria~phage~vB_EcoM_VR5	Caudovirales	Myoviridae	Js98virus	41_1	Clustered	8	VC_41_1	8	0.0724	1.0	0.0724	2	1	1	0.9643
396	Enterobacteria~phage~vB_EcoP_ACG-C91	Caudovirales	Podoviridae	Zindervirus	245_0	Clustered	15	VC_245_0	15	1.0	1.0	1.0	2	1	1	1.0
397	Enterobacteria~phage~vB_EcoS_NBD2	Caudovirales	Siphoviridae	Eclunavirus	69_0	Clustered	32	VC_69_0	32	0.9801	1.0	0.9801	10	1	1	0.9435
398	Enterobacteria~phage~vB_EcoS_Rogue1	Caudovirales	Siphoviridae	Rogue1virus	69_0	Clustered	32	VC_69_0	32	0.9801	1.0	0.9801	10	1	1	0.9435
399	Enterobacteria~phage~vB_KleM-RaK2	Caudovirales	Myoviridae	Alcyoneusvirus	78_5	Clustered/Singleton	1	VC_78_5	1	0.0	1.0	0.0	1	1	1	1.0
400	Enterobacteriaphage~UAB_Phi87	Caudovirales	Myoviridae	Felixo1virus	23_0	Clustered	25	VC_23_0	25	0.905	1.0	0.905	5	1	1	0.9967
401	Enterococcus~phage~AUEF3	Caudovirales	Siphoviridae	Efquatrovirus	235_0	Clustered	16	VC_235_0	16	0.8868	1.0	0.8868	1	1	1	1.0
402	Enterococcus~phage~BC611	Caudovirales	Siphoviridae	Sap6virus	139_0	Clustered	6	VC_139_0	6	0.8632	0.99999999	0.8632	2	1	1	1.0
403	Enterococcus~phage~Ec-ZZ2	Caudovirales	Siphoviridae	Efquatrovirus	235_0	Clustered	16	VC_235_0	16	0.8868	1.0	0.8868	1	1	1	1.0
404	Enterococcus~phage~EfaCPT1	Caudovirales	Siphoviridae	Efquatrovirus	235_0	Clustered	16	VC_235_0	16	0.8868	1.0	0.8868	1	1	1	1.0
405	Enterococcus~phage~IME-EF4	Caudovirales	Siphoviridae	Efquatrovirus	235_0	Clustered	16	VC_235_0	16	0.8868	1.0	0.8868	1	1	1	1.0
406	Enterococcus~phage~IME-EFm1	Caudovirales	Siphoviridae	Efquatrovirus	235_0	Clustered	16	VC_235_0	16	0.8868	1.0	0.8868	1	1	1	1.0
407	Enterococcus~phage~IME-EFm5	Caudovirales	Siphoviridae	Efquatrovirus	235_0	Clustered	16	VC_235_0	16	0.8868	1.0	0.8868	1	1	1	1.0
408	Enterococcus~phage~IMEEF1	Caudovirales	Siphoviridae	Sap6virus	139_0	Clustered	6	VC_139_0	6	0.8632	0.99999999	0.8632	2	1	1	1.0
409	Enterococcus~phage~IME_EF3	Caudovirales	Siphoviridae	Efquatrovirus	235_0	Clustered	16	VC_235_0	16	0.8868	1.0	0.8868	1	1	1	1.0
410	Enterococcus~phage~LY0322	Caudovirales	Siphoviridae	Efquatrovirus	235_0	Clustered	16	VC_235_0	16	0.8868	1.0	0.8868	1	1	1	1.0
411	Enterococcus~phage~PMBT2	Caudovirales	Siphoviridae	Efquatrovirus	235_0	Clustered	16	VC_235_0	16	0.8868	1.0	0.8868	1	1	1	1.0
412	Enterococcus~phage~SANTOR1	Caudovirales	Siphoviridae	Efquatrovirus	235_0	Clustered	16	VC_235_0	16	0.8868	1.0	0.8868	1	1	1	1.0
413	Enterococcus~phage~SAP6	Caudovirales	Siphoviridae	Sap6virus	139_0	Clustered	6	VC_139_0	6	0.8632	0.99999999	0.8632	2	1	1	1.0
414	Enterococcus~phage~VD13	Caudovirales	Siphoviridae	Sap6virus	139_0	Clustered	6	VC_139_0	6	0.8632	0.99999999	0.8632	2	1	1	1.0
415	Enterococcus~phage~phiFL1A	Caudovirales	Siphoviridae	Phifelvirus	165_0	Clustered	3	VC_165_0	3	0.469	0.99739074	0.4677	1	1	1	1.0
416	Enterococcus~phage~phiFL2A	Caudovirales	Siphoviridae	Phifelvirus	165_0	Clustered	3	VC_165_0	3	0.469	0.99739074	0.4677	1	1	1	1.0
417	Enterococcus~phage~phiFL3A	Caudovirales	Siphoviridae	Phifelvirus	165_0	Clustered	3	VC_165_0	3	0.469	0.99739074	0.4677	1	1	1	1.0
418	Enterococcus~phage~phiSHEF2	Caudovirales	Siphoviridae	Efquatrovirus	235_0	Clustered	16	VC_235_0	16	0.8868	1.0	0.8868	1	1	1	1.0
419	Enterococcus~phage~phiSHEF4	Caudovirales	Siphoviridae	Efquatrovirus	235_0	Clustered	16	VC_235_0	16	0.8868	1.0	0.8868	1	1	1	1.0
420	Enterococcus~phage~phiSHEF5	Caudovirales	Siphoviridae	Efquatrovirus	235_0	Clustered	16	VC_235_0	16	0.8868	1.0	0.8868	1	1	1	1.0
421	Enterococcus~phage~vB_EfaP_IME195	Caudovirales	Podoviridae	Unassigned	248_0	Clustered	2	VC_248_0	2	0.2529	0.94261229	0.2384	1	1	1	1.0
422	Enterococcus~phage~vB_EfaS_AL2	Caudovirales	Siphoviridae	Efquatrovirus	235_0	Clustered	16	VC_235_0	16	0.8868	1.0	0.8868	1	1	1	1.0
423	Enterococcus~phage~vB_EfaS_IME196	Caudovirales	Siphoviridae	Efquatrovirus	235_0	Clustered	16	VC_235_0	16	0.8868	1.0	0.8868	1	1	1	1.0
424	Enterococcus~phage~vB_EfaS_IME198	Caudovirales	Siphoviridae	Saphexavirus	139_0	Clustered	6	VC_139_0	6	0.8632	0.99999999	0.8632	2	1	1	1.0
425	Enterococcus~phage~vB_Efae230P-4	Caudovirales	Podoviridae	Unassigned	248_0	Clustered	2	VC_248_0	2	0.2529	0.94261229	0.2384	1	1	1	1.0
426	Erwinia~amylovora~phage~Era103	Caudovirales	Podoviridae	Sp6virus	245_0	Clustered	15	VC_245_0	15	1.0	1.0	1.0	2	1	1	1.0
427	Erwinia~phage~ENT90	Caudovirales	Myoviridae	Peduovirus	75_0	Clustered	29	VC_75_0	29	0.8383	1.0	0.8383	2	1	1	1.0
428	Erwinia~phage~Ea35-70	Caudovirales	Myoviridae	Agrican357virus	223_0	Clustered	6	VC_223_0	6	0.4779	1.0	0.4779	2	1	1	1.0
429	Erwinia~phage~Ea9-2	Caudovirales	Podoviridae	Ea92virus	15_0	Clustered	2	VC_15_0	2	0.0721	0.95434246	0.0688	1	1	1	1.0
430	Erwinia~phage~FE44	Caudovirales	Podoviridae	Teseptimavirus	206_0	Clustered	60	VC_206_0	60	0.9832	1.0	0.9832	4	1	1	1.0
431	Erwinia~phage~phiEa100	Caudovirales	Podoviridae	Zindervirus	245_0	Clustered	15	VC_245_0	15	1.0	1.0	1.0	2	1	1	1.0
432	Erwinia~phage~phiEa104	Caudovirales	Myoviridae	Ea214virus	209_0	Clustered	3	VC_209_0	3	0.0928	0.99823583	0.0927	1	1	1	1.0
433	Erwinia~phage~phiEa21-4	Caudovirales	Myoviridae	Ea214virus	209_0	Clustered	3	VC_209_0	3	0.0928	0.99823583	0.0927	1	1	1	1.0
434	Erwinia~phage~phiEa2809	Caudovirales	Ackermannviridae	Unassigned	33_0	Clustered	2	VC_33_0	2	0.0236	0.87357713	0.0206	1	1	1	1.0
435	Erwinia~phage~phiEaH2	Caudovirales	Myoviridae	Eah2virus	224_1	Clustered	3	VC_224_1	3	0.1031	0.99307831	0.1024	2	1	1	1.0
436	Erwinia~phage~phiEt88	Caudovirales	Myoviridae	Unassigned	211_0	Clustered	2	VC_211_0	2	0.0424	0.95482413	0.0405	1	1	1	1.0
437	Erwinia~phage~vB_Eam-MM7	Caudovirales	Myoviridae	Ea214virus	209_0	Clustered	3	VC_209_0	3	0.0928	0.99823583	0.0927	1	1	1	1.0
438	Erwinia~phage~vB_EamM-Y2	Caudovirales	Myoviridae	Unassigned	64_0	Clustered	5	VC_64_0	5	1.0	1.0	1.0	1	1	1	1.0
439	Erwinia~phage~vB_EamM_Asesino	Caudovirales	Myoviridae	Eah2virus	224_1	Clustered	3	VC_224_1	3	0.1031	0.99307831	0.1024	2	1	1	1.0
440	Erwinia~phage~vB_EamM_Caitlin	Caudovirales	Myoviridae	Machinavirus	224_3	Clustered	2	VC_224_3	2	0.049	0.91381419	0.0447	1	1	1	1.0
441	Erwinia~phage~vB_EamM_ChrisDB	Caudovirales	Myoviridae	Machinavirus	224_3	Clustered	2	VC_224_3	2	0.049	0.91381419	0.0447	1	1	1	1.0
442	Erwinia~phage~vB_EamM_Deimos-Minion	Caudovirales	Myoviridae	Agrican357virus	223_0	Clustered	6	VC_223_0	6	0.4779	1.0	0.4779	2	1	1	1.0
443	Erwinia~phage~vB_EamM_Desertfox	Caudovirales	Myoviridae	Agricanvirus	223_0	Clustered	6	VC_223_0	6	0.4779	1.0	0.4779	2	1	1	1.0
444	Erwinia~phage~vB_EamM_EarlPhillipIV	Caudovirales	Myoviridae	Unassigned	224_0	Clustered	3	VC_224_0	3	0.1102	0.998289	0.11	1	1	1	1.0
445	Erwinia~phage~vB_EamM_Huxley	Caudovirales	Myoviridae	Machinavirus	224_2	Clustered	2	VC_224_2	2	0.0489	0.91381419	0.0447	1	1	1	1.0
446	Erwinia~phage~vB_EamM_Kwan	Caudovirales	Myoviridae	Unassigned	224_4	Clustered/Singleton	1	VC_224_4	1	0.0	1.0	0.0	1	1	1	1.0
447	Erwinia~phage~vB_EamM_Machina	Caudovirales	Myoviridae	Machinavirus	224_2	Clustered	2	VC_224_2	2	0.0489	0.91381419	0.0447	1	1	1	1.0
448	Erwinia~phage~vB_EamM_Phobos	Caudovirales	Myoviridae	Unassigned	224_0	Clustered	3	VC_224_0	3	0.1102	0.998289	0.11	1	1	1	1.0
449	Erwinia~phage~vB_EamM_RAY	Caudovirales	Myoviridae	Agrican357virus	223_0	Clustered	6	VC_223_0	6	0.4779	1.0	0.4779	2	1	1	1.0
450	Erwinia~phage~vB_EamM_RisingSun	Caudovirales	Myoviridae	Risingsunvirus	226_1	Clustered	3	VC_226_1	3	0.1346	0.99601424	0.134	3	1	1	0.6667
451	Erwinia~phage~vB_EamM_Simmy50	Caudovirales	Myoviridae	Agrican357virus	223_0	Clustered	6	VC_223_0	6	0.4779	1.0	0.4779	2	1	1	1.0
452	Erwinia~phage~vB_EamM_Special~G	Caudovirales	Myoviridae	Agrican357virus	223_0	Clustered	6	VC_223_0	6	0.4779	1.0	0.4779	2	1	1	1.0
453	Erwinia~phage~vB_EamP-L1	Caudovirales	Podoviridae	Przondovirus	206_0	Clustered	60	VC_206_0	60	0.9832	1.0	0.9832	4	1	1	1.0
454	Erwinia~phage~vB_EamP_Frozen	Caudovirales	Podoviridae	Ea92virus	15_0	Clustered	2	VC_15_0	2	0.0721	0.95434246	0.0688	1	1	1	1.0
455	Escherichia~Stx1~converting~phage	Caudovirales	Podoviridae	Traversvirus	187_0	Clustered	2	VC_187_0	2	0.0717	0.95502961	0.0685	2	1	1	1.0
456	Escherichia~coli~O157~typing~phage~1	Caudovirales	Myoviridae	Felixo1virus	23_0	Clustered	25	VC_23_0	25	0.905	1.0	0.905	5	1	1	0.9967
457	Escherichia~coli~O157~typing~phage~3	Caudovirales	Myoviridae	Mosigvirus	41_0	Clustered	9	VC_41_0	9	0.0691	1.0	0.0691	2	1	1	1.0
458	Escherichia~coli~O157~typing~phage~6	Caudovirales	Myoviridae	Mosigvirus	41_0	Clustered	9	VC_41_0	9	0.0691	1.0	0.0691	2	1	1	1.0
459	Escherichia~phage~121Q	Caudovirales	Myoviridae	Asteriusvirus	78_4	Clustered	2	VC_78_4	2	0.0979	0.90825255	0.0889	1	1	1	1.0
460	Escherichia~phage~172-1	Caudovirales	Podoviridae	Phieco32virus	231_0	Clustered	6	VC_231_0	6	0.8532	1.0	0.8532	1	1	1	1.0
461	Escherichia~phage~64795_ec1	Caudovirales	Podoviridae	Teseptimavirus	206_0	Clustered	60	VC_206_0	60	0.9832	1.0	0.9832	4	1	1	1.0
462	Escherichia~phage~ADB-2	Caudovirales	Siphoviridae	T1virus	69_0	Clustered	32	VC_69_0	32	0.9801	1.0	0.9801	10	1	1	0.9435
463	Escherichia~phage~APCEc01	Caudovirales	Myoviridae	Mosigvirus	41_0	Clustered	9	VC_41_0	9	0.0691	1.0	0.0691	2	1	1	1.0
464	Escherichia~phage~APCEc02	Caudovirales	Myoviridae	Vequintavirus	221_0	Clustered	8	VC_221_0	8	0.4903	1.0	0.4903	2	1	1	1.0
465	Escherichia~phage~AR1	Caudovirales	Myoviridae	T4virus	41_5	Clustered	32	VC_41_5	32	0.3565	1.0	0.3565	2	1	1	0.996
466	Escherichia~phage~Bp4	Caudovirales	Podoviridae	G7cvirus	15_1	Clustered	11	VC_15_1	11	0.4766	1.0	0.4766	3	1	1	0.9818
467	Escherichia~phage~C119	Caudovirales	Siphoviridae	Rogue1virus	69_0	Clustered	32	VC_69_0	32	0.9801	1.0	0.9801	10	1	1	0.9435
468	Escherichia~phage~CAjan	Caudovirales	Siphoviridae	Seuratvirus	11_0	Clustered	3	VC_11_0	3	0.2521	0.99820088	0.2516	1	1	1	1.0
469	Escherichia~phage~CICC~80001	Caudovirales	Podoviridae	Teseptimavirus	206_0	Clustered	60	VC_206_0	60	0.9832	1.0	0.9832	4	1	1	1.0
470	Escherichia~phage~D108	Caudovirales	Myoviridae	Muvirus	181_0	Clustered	3	VC_181_0	3	0.5536	0.99823291	0.5526	1	1	1	1.0
471	Escherichia~phage~EB49	Caudovirales	Siphoviridae	Rogue1virus	69_0	Clustered	32	VC_69_0	32	0.9801	1.0	0.9801	10	1	1	0.9435
472	Escherichia~phage~EC1-UPM	Caudovirales	Podoviridae	G7cvirus	15_1	Clustered	11	VC_15_1	11	0.4766	1.0	0.4766	3	1	1	0.9818
473	Escherichia~phage~EC6	Caudovirales	Myoviridae	Felixo1virus	23_0	Clustered	25	VC_23_0	25	0.905	1.0	0.905	5	1	1	0.9967
474	Escherichia~phage~ECBP1	Caudovirales	Podoviridae	G7cvirus	15_1	Clustered	11	VC_15_1	11	0.4766	1.0	0.4766	3	1	1	0.9818
475	Escherichia~phage~ECBP2	Caudovirales	Podoviridae	Phieco32virus	231_0	Clustered	6	VC_231_0	6	0.8532	1.0	0.8532	1	1	1	1.0
476	Escherichia~phage~ECBP5	Caudovirales	Podoviridae	Zindervirus	245_0	Clustered	15	VC_245_0	15	1.0	1.0	1.0	2	1	1	1.0
477	Escherichia~phage~ECD7	Caudovirales	Myoviridae	Krischvirus	45_0	Clustered	5	VC_45_0	5	0.1267	0.99999997	0.1267	2	1	1	1.0
478	Escherichia~phage~ECML-134	Caudovirales	Myoviridae	T4virus	41_5	Clustered	32	VC_41_5	32	0.3565	1.0	0.3565	2	1	1	0.996
479	Escherichia~phage~ECML-4	Caudovirales	Ackermannviridae	Vi1virus	33_1	Clustered	21	VC_33_1	21	0.8138	1.0	0.8138	5	1	1	0.819
480	Escherichia~phage~EK99P-1	Caudovirales	Siphoviridae	Hk578virus	229_0	Clustered	10	VC_229_0	10	0.662	1.0	0.662	2	1	1	1.0
481	Escherichia~phage~Envy	Caudovirales	Siphoviridae	Dhillonvirus	229_0	Clustered	10	VC_229_0	10	0.662	1.0	0.662	2	1	1	1.0
482	Escherichia~phage~FFH2	Caudovirales	Myoviridae	V5virus	221_0	Clustered	8	VC_221_0	8	0.4903	1.0	0.4903	2	1	1	1.0
483	Escherichia~phage~FV3	Caudovirales	Myoviridae	V5virus	221_0	Clustered	8	VC_221_0	8	0.4903	1.0	0.4903	2	1	1	1.0
484	Escherichia~phage~Gluttony	Caudovirales	Siphoviridae	Dhillonvirus	229_0	Clustered	10	VC_229_0	10	0.662	1.0	0.662	2	1	1	1.0
485	Escherichia~phage~HK446	Caudovirales	Siphoviridae	Hk97virus	169_0	Clustered	13	VC_169_0	13	0.4182	1.0	0.4182	2	1	1	1.0
486	Escherichia~phage~HK542	Caudovirales	Siphoviridae	Hk97virus	169_0	Clustered	13	VC_169_0	13	0.4182	1.0	0.4182	2	1	1	1.0
487	Escherichia~phage~HK544	Caudovirales	Siphoviridae	Hk97virus	169_0	Clustered	13	VC_169_0	13	0.4182	1.0	0.4182	2	1	1	1.0
488	Escherichia~phage~HK578	Caudovirales	Siphoviridae	Hk578virus	229_0	Clustered	10	VC_229_0	10	0.662	1.0	0.662	2	1	1	1.0
489	Escherichia~phage~HK633	Caudovirales	Siphoviridae	Hk97virus	169_0	Clustered	13	VC_169_0	13	0.4182	1.0	0.4182	2	1	1	1.0
490	Escherichia~phage~HK75	Caudovirales	Siphoviridae	Hk97virus	169_0	Clustered	13	VC_169_0	13	0.4182	1.0	0.4182	2	1	1	1.0
491	Escherichia~phage~HY01	Caudovirales	Myoviridae	T4virus	41_5	Clustered	32	VC_41_5	32	0.3565	1.0	0.3565	2	1	1	0.996
492	Escherichia~phage~HY02	Caudovirales	Myoviridae	Felixo1virus	23_0	Clustered	25	VC_23_0	25	0.905	1.0	0.905	5	1	1	0.9967
493	Escherichia~phage~HY03	Caudovirales	Myoviridae	Tequatrovirus	41_5	Clustered	32	VC_41_5	32	0.3565	1.0	0.3565	2	1	1	0.996
494	Escherichia~phage~IME11	Caudovirales	Podoviridae	G7cvirus	15_1	Clustered	11	VC_15_1	11	0.4766	1.0	0.4766	3	1	1	0.9818
495	Escherichia~phage~JES2013	Caudovirales	Myoviridae	V5virus	221_0	Clustered	8	VC_221_0	8	0.4903	1.0	0.4903	2	1	1	1.0
496	Escherichia~phage~JH2	Caudovirales	Myoviridae	Felixo1virus	23_0	Clustered	25	VC_23_0	25	0.905	1.0	0.905	5	1	1	0.9967
497	Escherichia~phage~JMPW1	Caudovirales	Siphoviridae	T1virus	69_0	Clustered	32	VC_69_0	32	0.9801	1.0	0.9801	10	1	1	0.9435
498	Escherichia~phage~JMPW2	Caudovirales	Siphoviridae	T1virus	69_0	Clustered	32	VC_69_0	32	0.9801	1.0	0.9801	10	1	1	0.9435
499	Escherichia~phage~JS98	Caudovirales	Myoviridae	Js98virus	41_1	Clustered	8	VC_41_1	8	0.0724	1.0	0.0724	2	1	1	0.9643
500	Escherichia~phage~JSE	Caudovirales	Myoviridae	Rb49virus	45_0	Clustered	5	VC_45_0	5	0.1267	0.99999997	0.1267	2	1	1	1.0
501	Escherichia~phage~K1ind1	Caudovirales	Siphoviridae	K1gvirus	56_0	Clustered	23	VC_56_0	23	0.8413	1.0	0.8413	5	1	1	1.0
502	Escherichia~phage~K30	Caudovirales	Podoviridae	Kp32virus	206_0	Clustered	60	VC_206_0	60	0.9832	1.0	0.9832	4	1	1	1.0
503	Escherichia~phage~KBNP1711	Caudovirales	Podoviridae	Phieco32virus	231_0	Clustered	6	VC_231_0	6	0.8532	1.0	0.8532	1	1	1	1.0
504	Escherichia~phage~LM33_P1	Caudovirales	Podoviridae	Teseptimavirus	206_0	Clustered	60	VC_206_0	60	0.9832	1.0	0.9832	4	1	1	1.0
505	Escherichia~phage~Lw1	Caudovirales	Myoviridae	Unassigned	44_1	Clustered	8	VC_44_1	8	0.2301	1.0	0.2301	1	1	1	1.0
506	Escherichia~phage~MX01	Caudovirales	Myoviridae	Dhakavirus	41_1	Clustered	8	VC_41_1	8	0.0724	1.0	0.0724	2	1	1	0.9643
507	Escherichia~phage~Min27	Caudovirales	Podoviridae	Nona33virus	187_1	Clustered	14	VC_187_1	14	0.5783	1.0	0.5783	5	1	1	0.8901
508	Escherichia~phage~Murica	Caudovirales	Myoviridae	Vequintavirus	221_0	Clustered	8	VC_221_0	8	0.4903	1.0	0.4903	2	1	1	1.0
509	Escherichia~phage~NJ01	Caudovirales	Podoviridae	Phieco32virus	231_0	Clustered	6	VC_231_0	6	0.8532	1.0	0.8532	1	1	1	1.0
510	Escherichia~phage~P13374	Caudovirales	Podoviridae	Oslovirus	187_1	Clustered	14	VC_187_1	14	0.5783	1.0	0.5783	5	1	1	0.8901
511	Escherichia~phage~P483	Caudovirales	Podoviridae	Teseptimavirus	206_0	Clustered	60	VC_206_0	60	0.9832	1.0	0.9832	4	1	1	1.0
512	Escherichia~phage~P694	Caudovirales	Podoviridae	Teseptimavirus	206_0	Clustered	60	VC_206_0	60	0.9832	1.0	0.9832	4	1	1	1.0
513	Escherichia~phage~PA2	Caudovirales	Podoviridae	Tl2011virus	187_1	Clustered	14	VC_187_1	14	0.5783	1.0	0.5783	5	1	1	0.8901
514	Escherichia~phage~PA28	Caudovirales	Podoviridae	Nona33virus	187_1	Clustered	14	VC_187_1	14	0.5783	1.0	0.5783	5	1	1	0.8901
515	Escherichia~phage~PBECO~4	Caudovirales	Myoviridae	Asteriusvirus	78_4	Clustered	2	VC_78_4	2	0.0979	0.90825255	0.0889	1	1	1	1.0
516	Escherichia~phage~PE3-1	Caudovirales	Podoviridae	Teseptimavirus	206_0	Clustered	60	VC_206_0	60	0.9832	1.0	0.9832	4	1	1	1.0
517	Escherichia~phage~PhaxI	Caudovirales	Ackermannviridae	Cba120virus	33_1	Clustered	21	VC_33_1	21	0.8138	1.0	0.8138	5	1	1	0.819
518	Escherichia~phage~Pollock	Caudovirales	Podoviridae	Sp58virus	19_0	Clustered	4	VC_19_0	4	0.1841	0.99998272	0.1841	2	1	1	1.0
519	Escherichia~phage~QL01	Caudovirales	Myoviridae	Js98virus	41_1	Clustered	8	VC_41_1	8	0.0724	1.0	0.0724	2	1	1	0.9643
520	Escherichia~phage~RB3	Caudovirales	Myoviridae	T4virus	41_5	Clustered	32	VC_41_5	32	0.3565	1.0	0.3565	2	1	1	0.996
521	Escherichia~phage~RCS47	Caudovirales	Myoviridae	Punavirus	251_0	Clustered	3	VC_251_0	3	0.9918	0.975127	0.9671	2	1	1	1.0
522	Escherichia~phage~SRT8	Caudovirales	Siphoviridae	Sertoctavirus	69_0	Clustered	32	VC_69_0	32	0.9801	1.0	0.9801	10	1	1	0.9435
523	Escherichia~phage~ST0	Caudovirales	Myoviridae	Mosigvirus	41_0	Clustered	9	VC_41_0	9	0.0691	1.0	0.0691	2	1	1	1.0
524	Escherichia~phage~SUSP1	Caudovirales	Myoviridae	Suspvirus	23_0	Clustered	25	VC_23_0	25	0.905	1.0	0.905	5	1	1	0.9967
525	Escherichia~phage~SUSP2	Caudovirales	Myoviridae	Suspvirus	23_0	Clustered	25	VC_23_0	25	0.905	1.0	0.905	5	1	1	0.9967
526	Escherichia~phage~Seurat	Caudovirales	Siphoviridae	Seuratvirus	11_0	Clustered	3	VC_11_0	3	0.2521	0.99820088	0.2516	1	1	1	1.0
527	Escherichia~phage~Stx2~II	Caudovirales	Podoviridae	Nona33virus	187_0	Clustered	2	VC_187_0	2	0.0717	0.95502961	0.0685	2	1	1	1.0
528	Escherichia~phage~TL-2011b	Caudovirales	Podoviridae	Uetakevirus	155_0	Clustered	5	VC_155_0	5	0.6913	0.99999946	0.6913	2	1	1	1.0
529	Escherichia~phage~TL-2011c	Caudovirales	Podoviridae	Tl2011virus	187_1	Clustered	14	VC_187_1	14	0.5783	1.0	0.5783	5	1	1	0.8901
530	Escherichia~phage~UFV-AREG1	Caudovirales	Myoviridae	Tequatrovirus	41_5	Clustered	32	VC_41_5	32	0.3565	1.0	0.3565	2	1	1	0.996
531	Escherichia~phage~V18	Caudovirales	Myoviridae	Vequintavirus	221_0	Clustered	8	VC_221_0	8	0.4903	1.0	0.4903	2	1	1	1.0
532	Escherichia~phage~V5	Caudovirales	Myoviridae	V5virus	221_0	Clustered	8	VC_221_0	8	0.4903	1.0	0.4903	2	1	1	1.0
533	Escherichia~phage~VB_EcoS-Golestan	Caudovirales	Siphoviridae	Kagunavirus	56_0	Clustered	23	VC_56_0	23	0.8413	1.0	0.8413	5	1	1	1.0
534	Escherichia~phage~WG01	Caudovirales	Myoviridae	Dhakavirus	41_1	Clustered	8	VC_41_1	8	0.0724	1.0	0.0724	2	1	1	0.9643
535	Escherichia~phage~YD-2008.s	Caudovirales	Siphoviridae	Hk578virus	229_0	Clustered	10	VC_229_0	10	0.662	1.0	0.662	2	1	1	1.0
536	Escherichia~phage~e4/1c	Caudovirales	Siphoviridae	Rogue1virus	69_0	Clustered	32	VC_69_0	32	0.9801	1.0	0.9801	10	1	1	0.9435
537	Escherichia~phage~ime09	Caudovirales	Myoviridae	T4virus	41_5	Clustered	32	VC_41_5	32	0.3565	1.0	0.3565	2	1	1	0.996
538	Escherichia~phage~mEp234	Caudovirales	Siphoviridae	Hk97virus	169_0	Clustered	13	VC_169_0	13	0.4182	1.0	0.4182	2	1	1	1.0
539	Escherichia~phage~mEpX1	Caudovirales	Siphoviridae	Hk97virus	169_0	Clustered	13	VC_169_0	13	0.4182	1.0	0.4182	2	1	1	1.0
540	Escherichia~phage~mEpX2	Caudovirales	Siphoviridae	Hk97virus	169_0	Clustered	13	VC_169_0	13	0.4182	1.0	0.4182	2	1	1	1.0
541	Escherichia~phage~phAPEC8	Caudovirales	Myoviridae	Unassigned	54_0	Clustered	2	VC_54_0	2	0.1611	0.95399842	0.1537	1	1	1	1.0
542	Escherichia~phage~phi191	Caudovirales	Podoviridae	Tl2011virus	187_1	Clustered	14	VC_187_1	14	0.5783	1.0	0.5783	5	1	1	0.8901
543	Escherichia~phage~phiK	Unassigned	Microviridae	Alpha3microvirus	239_0	Clustered	8	VC_239_0	8	0.9623	0.99999117	0.9623	4	1	1	1.0
544	Escherichia~phage~phiKT	Caudovirales	Podoviridae	Unassigned	72_0	Clustered	15	VC_72_0	15	0.7255	1.0	0.7255	6	1	1	1.0
545	Escherichia~phage~phiV10	Caudovirales	Podoviridae	Epsilon15virus	155_0	Clustered	5	VC_155_0	5	0.6913	0.99999946	0.6913	2	1	1	1.0
546	Escherichia~phage~pro147	Caudovirales	Myoviridae	Peduovirus	75_0	Clustered	29	VC_75_0	29	0.8383	1.0	0.8383	2	1	1	1.0
547	Escherichia~phage~pro483	Caudovirales	Myoviridae	Peduovirus	75_0	Clustered	29	VC_75_0	29	0.8383	1.0	0.8383	2	1	1	1.0
548	Escherichia~phage~slur01	Caudovirales	Siphoviridae	Seuratvirus	11_0	Clustered	3	VC_11_0	3	0.2521	0.99820088	0.2516	1	1	1	1.0
549	Escherichia~phage~slur02	Caudovirales	Myoviridae	Tequatrovirus	41_5	Clustered	32	VC_41_5	32	0.3565	1.0	0.3565	2	1	1	0.996
550	Escherichia~phage~slur03	Caudovirales	Myoviridae	Tequatrovirus	41_5	Clustered	32	VC_41_5	32	0.3565	1.0	0.3565	2	1	1	0.996
551	Escherichia~phage~slur04	Caudovirales	Myoviridae	Tequatrovirus	41_5	Clustered	32	VC_41_5	32	0.3565	1.0	0.3565	2	1	1	0.996
552	Escherichia~phage~slur05	Caudovirales	Siphoviridae	Dhillonvirus	229_0	Clustered	10	VC_229_0	10	0.662	1.0	0.662	2	1	1	1.0
553	Escherichia~phage~slur07	Caudovirales	Myoviridae	Tequatrovirus	41_5	Clustered	32	VC_41_5	32	0.3565	1.0	0.3565	2	1	1	0.996
554	Escherichia~phage~slur09	Caudovirales	Siphoviridae	T5virus	252_0	Clustered	14	VC_252_0	14	0.6406	1.0	0.6406	2	1	1	1.0
555	Escherichia~phage~slur14	Caudovirales	Myoviridae	Tequatrovirus	41_5	Clustered	32	VC_41_5	32	0.3565	1.0	0.3565	2	1	1	0.996
556	Escherichia~phage~slur16	Caudovirales	Myoviridae	Vequintavirus	221_0	Clustered	8	VC_221_0	8	0.4903	1.0	0.4903	2	1	1	1.0
557	Escherichia~phage~vB_EcoM-UFV13	Caudovirales	Myoviridae	Tequatrovirus	41_5	Clustered	32	VC_41_5	32	0.3565	1.0	0.3565	2	1	1	0.996
558	Escherichia~phage~vB_EcoM-VpaE1	Caudovirales	Myoviridae	Felixo1virus	23_0	Clustered	25	VC_23_0	25	0.905	1.0	0.905	5	1	1	0.9967
559	Escherichia~phage~vB_EcoM-ep3	Caudovirales	Myoviridae	Cvm10virus	67_0	Clustered	5	VC_67_0	5	0.3462	0.99999995	0.3462	2	1	1	1.0
560	Escherichia~phage~vB_EcoM_112	Caudovirales	Myoviridae	T4virus	41_5	Clustered	32	VC_41_5	32	0.3565	1.0	0.3565	2	1	1	0.996
561	Escherichia~phage~vB_EcoM_ACG-C40	Caudovirales	Myoviridae	T4virus	41_5	Clustered	32	VC_41_5	32	0.3565	1.0	0.3565	2	1	1	0.996
562	Escherichia~phage~vB_EcoM_AYO145A	Caudovirales	Myoviridae	Felixo1virus	23_0	Clustered	25	VC_23_0	25	0.905	1.0	0.905	5	1	1	0.9967
563	Escherichia~phage~vB_EcoM_Alf5	Caudovirales	Myoviridae	Felixounavirus	23_0	Clustered	25	VC_23_0	25	0.905	1.0	0.905	5	1	1	0.9967
564	Escherichia~phage~vB_EcoM_ECO1230-10	Caudovirales	Myoviridae	Cvm10virus	67_0	Clustered	5	VC_67_0	5	0.3462	0.99999995	0.3462	2	1	1	1.0
565	Escherichia~phage~vB_EcoM_ECOO78	Caudovirales	Myoviridae	Jilinvirus	67_0	Clustered	5	VC_67_0	5	0.3462	0.99999995	0.3462	2	1	1	1.0
566	Escherichia~phage~vB_EcoM_JS09	Caudovirales	Myoviridae	Rb69virus	41_0	Clustered	9	VC_41_0	9	0.0691	1.0	0.0691	2	1	1	1.0
567	Escherichia~phage~vB_EcoM_PhAPEC2	Caudovirales	Myoviridae	Mosigvirus	41_0	Clustered	9	VC_41_0	9	0.0691	1.0	0.0691	2	1	1	1.0
568	Escherichia~phage~vB_EcoM_VR20	Caudovirales	Myoviridae	Sp18virus	41_12	Clustered	5	VC_41_12	5	0.0407	0.99999977	0.0407	1	1	1	1.0
569	Escherichia~phage~vB_EcoM_VR25	Caudovirales	Myoviridae	Sp18virus	41_12	Clustered	5	VC_41_12	5	0.0407	0.99999977	0.0407	1	1	1	1.0
570	Escherichia~phage~vB_EcoM_VR26	Caudovirales	Myoviridae	Sp18virus	41_12	Clustered	5	VC_41_12	5	0.0407	0.99999977	0.0407	1	1	1	1.0
571	Escherichia~phage~vB_EcoM_VR7	Caudovirales	Myoviridae	Sp18virus	41_12	Clustered	5	VC_41_12	5	0.0407	0.99999977	0.0407	1	1	1	1.0
572	Escherichia~phage~vB_EcoP_24B	Caudovirales	Podoviridae	Nona33virus	187_1	Clustered	14	VC_187_1	14	0.5783	1.0	0.5783	5	1	1	0.8901
573	Escherichia~phage~vB_EcoP_G7C	Caudovirales	Podoviridae	G7cvirus	15_1	Clustered	11	VC_15_1	11	0.4766	1.0	0.4766	3	1	1	0.9818
574	Escherichia~phage~vB_EcoP_GA2A	Caudovirales	Podoviridae	Teseptimavirus	206_0	Clustered	60	VC_206_0	60	0.9832	1.0	0.9832	4	1	1	1.0
575	Escherichia~phage~vB_EcoP_PhAPEC5	Caudovirales	Podoviridae	G7cvirus	15_1	Clustered	11	VC_15_1	11	0.4766	1.0	0.4766	3	1	1	0.9818
576	Escherichia~phage~vB_EcoP_PhAPEC7	Caudovirales	Podoviridae	G7cvirus	15_1	Clustered	11	VC_15_1	11	0.4766	1.0	0.4766	3	1	1	0.9818
577	Escherichia~phage~vB_EcoP_SU10	Caudovirales	Podoviridae	Phieco32virus	231_0	Clustered	6	VC_231_0	6	0.8532	1.0	0.8532	1	1	1	1.0
578	Escherichia~phage~vB_EcoS_AHP42	Caudovirales	Siphoviridae	Rogue1virus	69_0	Clustered	32	VC_69_0	32	0.9801	1.0	0.9801	10	1	1	0.9435
579	Escherichia~phage~vB_EcoS_AHS24	Caudovirales	Siphoviridae	Rogue1virus	69_0	Clustered	32	VC_69_0	32	0.9801	1.0	0.9801	10	1	1	0.9435
580	Escherichia~phage~vB_EcoS_AKS96	Caudovirales	Siphoviridae	Rogue1virus	69_0	Clustered	32	VC_69_0	32	0.9801	1.0	0.9801	10	1	1	0.9435
581	Escherichia~phage~vB_EcoS_FFH1	Caudovirales	Siphoviridae	T5virus	252_0	Clustered	14	VC_252_0	14	0.6406	1.0	0.6406	2	1	1	1.0
582	Escherichia~phage~vB_Eco_ACG-M12	Caudovirales	Siphoviridae	Rtpvirus	69_0	Clustered	32	VC_69_0	32	0.9801	1.0	0.9801	10	1	1	0.9435
583	Escherichia~phage~wV7	Caudovirales	Myoviridae	Tequatrovirus	41_5	Clustered	32	VC_41_5	32	0.3565	1.0	0.3565	2	1	1	0.996
584	Escherichia~phage~wV8	Caudovirales	Myoviridae	Felixo1virus	23_0	Clustered	25	VC_23_0	25	0.905	1.0	0.905	5	1	1	0.9967
585	Escherichia~virus~186	Caudovirales	Myoviridae	P2virus	75_0	Clustered	29	VC_75_0	29	0.8383	1.0	0.8383	2	1	1	1.0
586	Escherichia~virus~AKFV33	Caudovirales	Siphoviridae	T5virus	252_0	Clustered	14	VC_252_0	14	0.6406	1.0	0.6406	2	1	1	1.0
587	Escherichia~virus~CBA120	Caudovirales	Ackermannviridae	Cba120virus	33_1	Clustered	21	VC_33_1	21	0.8138	1.0	0.8138	5	1	1	0.819
588	Escherichia~virus~DT57C	Caudovirales	Siphoviridae	T5virus	252_0	Clustered	14	VC_252_0	14	0.6406	1.0	0.6406	2	1	1	1.0
589	Escherichia~virus~EPS7	Caudovirales	Siphoviridae	T5virus	252_0	Clustered	14	VC_252_0	14	0.6406	1.0	0.6406	2	1	1	1.0
590	Escherichia~virus~FI	Unassigned	Leviviridae	Allolevivirus	39_0	Clustered	3	VC_39_0	3	0.8247	0.97657291	0.8054	1	1	1	1.0
591	Escherichia~virus~HK022	Caudovirales	Siphoviridae	Hk97virus	169_0	Clustered	13	VC_169_0	13	0.4182	1.0	0.4182	2	1	1	1.0
592	Escherichia~virus~HK97	Caudovirales	Siphoviridae	Hk97virus	169_0	Clustered	13	VC_169_0	13	0.4182	1.0	0.4182	2	1	1	1.0
593	Escherichia~virus~I22	Unassigned	Inoviridae	Lineavirus	242_0	Clustered/Singleton	1	VC_242_0	1	0.0	1.0	0.0	1	1	1	1.0
594	Escherichia~virus~JL1	Caudovirales	Siphoviridae	Hk578virus	229_0	Clustered	10	VC_229_0	10	0.662	1.0	0.662	2	1	1	1.0
595	Escherichia~virus~K1-5	Caudovirales	Podoviridae	Sp6virus	245_0	Clustered	15	VC_245_0	15	1.0	1.0	1.0	2	1	1	1.0
596	Escherichia~virus~K1E	Caudovirales	Podoviridae	Sp6virus	245_0	Clustered	15	VC_245_0	15	1.0	1.0	1.0	2	1	1	1.0
597	Escherichia~virus~KP26	Caudovirales	Siphoviridae	Rogue1virus	69_0	Clustered	32	VC_69_0	32	0.9801	1.0	0.9801	10	1	1	0.9435
598	Escherichia~virus~M13	Unassigned	Inoviridae	Inovirus	243_0	Clustered	3	VC_243_0	3	0.7184	0.9639009	0.6924	2	1	1	1.0
599	Escherichia~virus~Mu	Caudovirales	Myoviridae	Muvirus	181_0	Clustered	3	VC_181_0	3	0.5536	0.99823291	0.5526	1	1	1	1.0
600	Escherichia~virus~N4	Caudovirales	Podoviridae	N4virus	15_1	Clustered	11	VC_15_1	11	0.4766	1.0	0.4766	3	1	1	0.9818
601	Escherichia~virus~P1	Caudovirales	Myoviridae	P1virus	251_0	Clustered	3	VC_251_0	3	0.9918	0.975127	0.9671	2	1	1	1.0
602	Escherichia~virus~P2	Caudovirales	Myoviridae	P2virus	75_0	Clustered	29	VC_75_0	29	0.8383	1.0	0.8383	2	1	1	1.0
603	Escherichia~virus~Qbeta	Unassigned	Leviviridae	Allolevivirus	39_0	Clustered	3	VC_39_0	3	0.8247	0.97657291	0.8054	1	1	1	1.0
604	Escherichia~virus~RB14	Caudovirales	Myoviridae	T4virus	41_5	Clustered	32	VC_41_5	32	0.3565	1.0	0.3565	2	1	1	0.996
605	Escherichia~virus~RB16	Caudovirales	Myoviridae	Unassigned	44_1	Clustered	8	VC_44_1	8	0.2301	1.0	0.2301	1	1	1	1.0
606	Escherichia~virus~RB32	Caudovirales	Myoviridae	Tequatrovirus	41_5	Clustered	32	VC_41_5	32	0.3565	1.0	0.3565	2	1	1	0.996
607	Escherichia~virus~RB43	Caudovirales	Myoviridae	Unassigned	44_1	Clustered	8	VC_44_1	8	0.2301	1.0	0.2301	1	1	1	1.0
608	Escherichia~virus~Rtp	Caudovirales	Siphoviridae	Rtpvirus	69_0	Clustered	32	VC_69_0	32	0.9801	1.0	0.9801	10	1	1	0.9435
609	Escherichia~virus~SSL2009a	Caudovirales	Siphoviridae	Hk578virus	229_0	Clustered	10	VC_229_0	10	0.662	1.0	0.662	2	1	1	1.0
610	Escherichia~virus~T1	Caudovirales	Siphoviridae	T1virus	69_0	Clustered	32	VC_69_0	32	0.9801	1.0	0.9801	10	1	1	0.9435
611	Escherichia~virus~T4	Caudovirales	Myoviridae	T4virus	41_5	Clustered	32	VC_41_5	32	0.3565	1.0	0.3565	2	1	1	0.996
612	Escherichia~virus~T5	Caudovirales	Siphoviridae	T5virus	252_0	Clustered	14	VC_252_0	14	0.6406	1.0	0.6406	2	1	1	1.0
613	Escherichia~virus~TLS	Caudovirales	Siphoviridae	Tlsvirus	69_0	Clustered	32	VC_69_0	32	0.9801	1.0	0.9801	10	1	1	0.9435
614	Escherichia~virus~Wphi	Caudovirales	Myoviridae	P2virus	75_0	Clustered	29	VC_75_0	29	0.8383	1.0	0.8383	2	1	1	1.0
615	Escherichia~virus~phiEco32	Caudovirales	Podoviridae	Phieco32virus	231_0	Clustered	6	VC_231_0	6	0.8532	1.0	0.8532	1	1	1	1.0
616	Escherichia~virus~phiX174	Unassigned	Microviridae	Phix174microvirus	239_0	Clustered	8	VC_239_0	8	0.9623	0.99999117	0.9623	4	1	1	1.0
617	Flavobacterium~phage~1H	Caudovirales	Siphoviridae	Unahavirus	254_0	Clustered	4	VC_254_0	4	1.0	1.0	1.0	1	1	1	1.0
618	Flavobacterium~phage~23T	Caudovirales	Siphoviridae	Unahavirus	254_0	Clustered	4	VC_254_0	4	1.0	1.0	1.0	1	1	1	1.0
619	Flavobacterium~phage~2A	Caudovirales	Siphoviridae	Unahavirus	254_0	Clustered	4	VC_254_0	4	1.0	1.0	1.0	1	1	1	1.0
620	Flavobacterium~phage~6H	Caudovirales	Siphoviridae	Unahavirus	254_0	Clustered	4	VC_254_0	4	1.0	1.0	1.0	1	1	1	1.0
621	Flavobacterium~phage~FCL-2	Caudovirales	Myoviridae	Ficleduovirus	205_0	Clustered	2	VC_205_0	2	0.7114	0.76024994	0.5409	1	1	1	1.0
622	Flavobacterium~phage~FCV-1	Caudovirales	Myoviridae	Ficleduovirus	205_0	Clustered	2	VC_205_0	2	0.7114	0.76024994	0.5409	1	1	1	1.0
623	Flavobacterium~phage~FpV4	Caudovirales	Podoviridae	Fipvunavirus	204_0	Clustered	5	VC_204_0	5	0.9731	0.99869977	0.9718	1	1	1	1.0
624	Flavobacterium~phage~Fpv1	Caudovirales	Podoviridae	Fipvunavirus	204_0	Clustered	5	VC_204_0	5	0.9731	0.99869977	0.9718	1	1	1	1.0
625	Flavobacterium~phage~Fpv10	Unassigned	Unassigned	Unassigned	161_0	Clustered	6	VC_161_0	6	0.9605	0.99999996	0.9605	1	1	1	1.0
626	Flavobacterium~phage~Fpv11	Unassigned	Unassigned	Unassigned	161_0	Clustered	6	VC_161_0	6	0.9605	0.99999996	0.9605	1	1	1	1.0
627	Flavobacterium~phage~Fpv2	Caudovirales	Podoviridae	Fipvunavirus	204_0	Clustered	5	VC_204_0	5	0.9731	0.99869977	0.9718	1	1	1	1.0
628	Flavobacterium~phage~Fpv20	Caudovirales	Podoviridae	Fipvunavirus	204_0	Clustered	5	VC_204_0	5	0.9731	0.99869977	0.9718	1	1	1	1.0
629	Flavobacterium~phage~Fpv3	Caudovirales	Podoviridae	Fipvunavirus	204_0	Clustered	5	VC_204_0	5	0.9731	0.99869977	0.9718	1	1	1	1.0
630	Flavobacterium~phage~Fpv5	Unassigned	Unassigned	Unassigned	161_0	Clustered	6	VC_161_0	6	0.9605	0.99999996	0.9605	1	1	1	1.0
631	Flavobacterium~phage~Fpv6	Unassigned	Unassigned	Unassigned	161_0	Clustered	6	VC_161_0	6	0.9605	0.99999996	0.9605	1	1	1	1.0
632	Flavobacterium~phage~Fpv7	Unassigned	Unassigned	Unassigned	161_0	Clustered	6	VC_161_0	6	0.9605	0.99999996	0.9605	1	1	1	1.0
633	Flavobacterium~phage~Fpv8	Unassigned	Unassigned	Unassigned	161_0	Clustered	6	VC_161_0	6	0.9605	0.99999996	0.9605	1	1	1	1.0
634	Geobacillus~phage~GBK2	Caudovirales	Siphoviridae	Unassigned	141_0	Clustered	3	VC_141_0	3	0.2735	0.95352973	0.2607	2	1	1	0.6667
635	Geobacillus~phage~GBSV1	Caudovirales	Myoviridae	Svunavirus	137_0	Clustered	2	VC_137_0	2	0.4859	0.94175458	0.4576	1	1	1	1.0
636	Geobacillus~phage~TP-84	Caudovirales	Siphoviridae	Tp84virus	141_0	Clustered	3	VC_141_0	3	0.2735	0.95352973	0.2607	2	1	1	0.6667
637	Geobacillus~virus~E2	Caudovirales	Siphoviridae	Unassigned	131_0	Clustered	2	VC_131_0	2	0.3259	0.93865445	0.3059	1	2	2	1.0
638	Geobacillus~virus~E3	Caudovirales	Siphoviridae	Unassigned	113_2	Clustered/Singleton	1	VC_113_2	1	0.0	1.0	0.0	1	1	1	1.0
639	Gokushovirinae~Bog1183_53	Unassigned	Microviridae	Unassigned	79_0	Clustered	12	VC_79_0	12	0.7885	1.0	0.7885	3	1	1	1.0
640	Gokushovirinae~Bog5712_52	Unassigned	Microviridae	Unassigned	79_0	Clustered	12	VC_79_0	12	0.7885	1.0	0.7885	3	1	1	1.0
641	Gokushovirinae~Bog8989_22	Unassigned	Microviridae	Unassigned	79_0	Clustered	12	VC_79_0	12	0.7885	1.0	0.7885	3	1	1	1.0
642	Gokushovirinae~Fen672_31	Unassigned	Microviridae	Unassigned	79_0	Clustered	12	VC_79_0	12	0.7885	1.0	0.7885	3	1	1	1.0
643	Gokushovirinae~Fen7875_21	Unassigned	Microviridae	Unassigned	79_0	Clustered	12	VC_79_0	12	0.7885	1.0	0.7885	3	1	1	1.0
644	Gordonia~phage~Attis	Caudovirales	Siphoviridae	Attisvirus	255_0	Clustered	2	VC_255_0	2	0.1719	0.95378038	0.164	1	1	1	1.0
645	Gordonia~phage~Bachita	Caudovirales	Siphoviridae	Smoothievirus	261_0	Clustered	4	VC_261_0	4	0.5247	0.99979911	0.5246	1	1	1	1.0
646	Gordonia~phage~BaxterFox	Caudovirales	Siphoviridae	Baxtervirus	255_1	Clustered	5	VC_255_1	5	0.4845	0.99999991	0.4845	2	1	1	1.0
647	Gordonia~phage~Blueberry	Caudovirales	Siphoviridae	Unassigned	257_0	Clustered	7	VC_257_0	7	0.753	1.0	0.753	1	1	1	1.0
648	Gordonia~phage~Bowser	Caudovirales	Siphoviridae	Bowservirus	256_0	Clustered	3	VC_256_0	3	0.2712	0.99822025	0.2707	2	1	1	1.0
649	Gordonia~phage~Brandonk123	Caudovirales	Siphoviridae	Vividuovirus	265_0	Clustered	5	VC_265_0	5	0.8122	0.99990968	0.8121	2	1	1	1.0
650	Gordonia~phage~BritBrat	Caudovirales	Siphoviridae	Britbratvirus	106_0	Clustered	2	VC_106_0	2	0.212	0.94630333	0.2006	2	1	1	1.0
651	Gordonia~phage~CaptainKirk2	Caudovirales	Siphoviridae	Unassigned	257_0	Clustered	7	VC_257_0	7	0.753	1.0	0.753	1	1	1	1.0
652	Gordonia~phage~CarolAnn	Caudovirales	Siphoviridae	Unassigned	257_0	Clustered	7	VC_257_0	7	0.753	1.0	0.753	1	1	1	1.0
653	Gordonia~phage~ClubL	Caudovirales	Siphoviridae	Smoothievirus	261_0	Clustered	4	VC_261_0	4	0.5247	0.99979911	0.5246	1	1	1	1.0
654	Gordonia~phage~Cozz	Caudovirales	Siphoviridae	Emalynvirus	266_0	Clustered	4	VC_266_0	4	0.7467	0.99955772	0.7464	1	1	1	1.0
655	Gordonia~phage~Cucurbita	Caudovirales	Siphoviridae	Smoothievirus	261_0	Clustered	4	VC_261_0	4	0.5247	0.99979911	0.5246	1	1	1	1.0
656	Gordonia~phage~Demosthenes	Caudovirales	Siphoviridae	Demosthenesvirus	268_0	Clustered	3	VC_268_0	3	0.2141	0.99784425	0.2136	1	1	1	1.0
657	Gordonia~phage~Emalyn	Caudovirales	Siphoviridae	Emalynvirus	266_0	Clustered	4	VC_266_0	4	0.7467	0.99955772	0.7464	1	1	1	1.0
658	Gordonia~phage~GAL1	Caudovirales	Siphoviridae	Galunavirus	106_0	Clustered	2	VC_106_0	2	0.212	0.94630333	0.2006	2	1	1	1.0
659	Gordonia~phage~GMA1	Caudovirales	Siphoviridae	Unassigned	258_0	Clustered	3	VC_258_0	3	0.2724	0.8261431	0.225	1	1	1	1.0
660	Gordonia~phage~GMA3	Caudovirales	Siphoviridae	Gamtrevirus	267_0	Clustered	5	VC_267_0	5	0.4566	0.99999979	0.4566	3	1	1	1.0
661	Gordonia~phage~GMA4	Caudovirales	Siphoviridae	Unassigned	218_0	Clustered	2	VC_218_0	2	0.2674	0.91237788	0.244	2	1	1	1.0
662	Gordonia~phage~GMA5	Caudovirales	Siphoviridae	Unassigned	104_0	Clustered	4	VC_104_0	4	0.7904	0.99289298	0.7848	1	1	1	1.0
663	Gordonia~phage~GMA7	Caudovirales	Siphoviridae	Getseptimavirus	268_2	Clustered	2	VC_268_2	2	0.1017	0.94824791	0.0964	1	1	1	1.0
664	Gordonia~phage~GRU1	Caudovirales	Siphoviridae	Unassigned	217_0	Clustered	3	VC_217_0	3	0.7225	0.99761149	0.7208	1	1	1	1.0
665	Gordonia~phage~GRU3	Caudovirales	Siphoviridae	Unassigned	104_0	Clustered	4	VC_104_0	4	0.7904	0.99289298	0.7848	1	1	1	1.0
666	Gordonia~phage~GTE2	Caudovirales	Siphoviridae	Emalynvirus	266_0	Clustered	4	VC_266_0	4	0.7467	0.99955772	0.7464	1	1	1	1.0
667	Gordonia~phage~GTE5	Caudovirales	Siphoviridae	Unassigned	217_0	Clustered	3	VC_217_0	3	0.7225	0.99761149	0.7208	1	1	1	1.0
668	Gordonia~phage~GTE6	Caudovirales	Siphoviridae	Unassigned	265_0	Clustered	5	VC_265_0	5	0.8122	0.99990968	0.8121	2	1	1	1.0
669	Gordonia~phage~GTE7	Caudovirales	Siphoviridae	Getseptimavirus	268_2	Clustered	2	VC_268_2	2	0.1017	0.94824791	0.0964	1	1	1	1.0
670	Gordonia~phage~GTE8	Caudovirales	Siphoviridae	Unassigned	217_0	Clustered	3	VC_217_0	3	0.7225	0.99761149	0.7208	1	1	1	1.0
671	Gordonia~phage~Gmala1	Caudovirales	Siphoviridae	Gordtnkvirus	267_0	Clustered	5	VC_267_0	5	0.4566	0.99999979	0.4566	3	1	1	1.0
672	Gordonia~phage~GordDuk1	Caudovirales	Siphoviridae	Gordtnkvirus	267_0	Clustered	5	VC_267_0	5	0.4566	0.99999979	0.4566	3	1	1	1.0
673	Gordonia~phage~GordTnk2	Caudovirales	Siphoviridae	Gordtnkvirus	267_0	Clustered	5	VC_267_0	5	0.4566	0.99999979	0.4566	3	1	1	1.0
674	Gordonia~phage~Gsput1	Caudovirales	Siphoviridae	Gesputvirus	91_0	Clustered	3	VC_91_0	3	0.8037	0.9971824	0.8014	2	1	1	1.0
675	Gordonia~phage~Guacamole	Caudovirales	Siphoviridae	Unassigned	257_0	Clustered	7	VC_257_0	7	0.753	1.0	0.753	1	1	1	1.0
676	Gordonia~phage~Gustav	Caudovirales	Siphoviridae	Gustavvirus	90_0	Clustered	2	VC_90_0	2	0.4501	0.95374314	0.4293	1	1	1	1.0
677	Gordonia~phage~Hedwig	Caudovirales	Siphoviridae	Hedwigvirus	256_0	Clustered	3	VC_256_0	3	0.2712	0.99822025	0.2707	2	1	1	1.0
678	Gordonia~phage~Hotorobo	Caudovirales	Siphoviridae	Woesvirus	268_3	Clustered	3	VC_268_3	3	0.163	0.99784056	0.1626	1	1	1	1.0
679	Gordonia~phage~Jumbo	Caudovirales	Siphoviridae	Gorjumvirus	267_0	Clustered	5	VC_267_0	5	0.4566	0.99999979	0.4566	3	1	1	1.0
680	Gordonia~phage~Katyusha	Caudovirales	Siphoviridae	Demosthenesvirus	268_0	Clustered	3	VC_268_0	3	0.2141	0.99784425	0.2136	1	1	1	1.0
681	Gordonia~phage~Kita	Caudovirales	Siphoviridae	Nymphadoravirus	255_1	Clustered	5	VC_255_1	5	0.4845	0.99999991	0.4845	2	1	1	1.0
682	Gordonia~phage~Kvothe	Caudovirales	Siphoviridae	Demosthenesvirus	268_0	Clustered	3	VC_268_0	3	0.2141	0.99784425	0.2136	1	1	1	1.0
683	Gordonia~phage~Lennon	Caudovirales	Siphoviridae	Vividuovirus	265_0	Clustered	5	VC_265_0	5	0.8122	0.99990968	0.8121	2	1	1	1.0
684	Gordonia~phage~Lucky10	Caudovirales	Siphoviridae	Unassigned	106_1	Clustered/Singleton	1	VC_106_1	1	0.0	1.0	0.0	1	1	1	1.0
685	Gordonia~phage~Mahdia	Caudovirales	Siphoviridae	Gustavvirus	90_0	Clustered	2	VC_90_0	2	0.4501	0.95374314	0.4293	1	1	1	1.0
686	Gordonia~phage~McGonagall	Caudovirales	Siphoviridae	Unassigned	104_0	Clustered	4	VC_104_0	4	0.7904	0.99289298	0.7848	1	1	1	1.0
687	Gordonia~phage~Monty	Caudovirales	Siphoviridae	Woesvirus	268_3	Clustered	3	VC_268_3	3	0.163	0.99784056	0.1626	1	1	1	1.0
688	Gordonia~phage~Nymphadora	Caudovirales	Siphoviridae	Nymphadoravirus	255_1	Clustered	5	VC_255_1	5	0.4845	0.99999991	0.4845	2	1	1	1.0
689	Gordonia~phage~Obliviate	Caudovirales	Siphoviridae	Unassigned	257_0	Clustered	7	VC_257_0	7	0.753	1.0	0.753	1	1	1	1.0
690	Gordonia~phage~OneUp	Caudovirales	Siphoviridae	Smoothievirus	261_1	Clustered/Singleton	1	VC_261_1	1	0.0	1.0	0.0	1	1	1	1.0
691	Gordonia~phage~Phinally	Caudovirales	Siphoviridae	Unassigned	265_0	Clustered	5	VC_265_0	5	0.8122	0.99990968	0.8121	2	1	1	1.0
692	Gordonia~phage~Schwabeltier	Caudovirales	Siphoviridae	Bowservirus	256_0	Clustered	3	VC_256_0	3	0.2712	0.99822025	0.2707	2	1	1	1.0
693	Gordonia~phage~Smoothie	Caudovirales	Siphoviridae	Smoothievirus	261_0	Clustered	4	VC_261_0	4	0.5247	0.99979911	0.5246	1	1	1	1.0
694	Gordonia~phage~SoilAssassin	Caudovirales	Siphoviridae	Attisvirus	255_0	Clustered	2	VC_255_0	2	0.1719	0.95378038	0.164	1	1	1	1.0
695	Gordonia~phage~Sour	Caudovirales	Siphoviridae	Sourvirus	61_0	Clustered/Singleton	1	VC_61_0	1	0.0	1.0	0.0	1	1	1	1.0
696	Gordonia~phage~Splinter	Caudovirales	Siphoviridae	Vendettavirus	91_0	Clustered	3	VC_91_0	3	0.8037	0.9971824	0.8014	2	1	1	1.0
697	Gordonia~phage~Troje	Caudovirales	Siphoviridae	Emalynvirus	266_0	Clustered	4	VC_266_0	4	0.7467	0.99955772	0.7464	1	1	1	1.0
698	Gordonia~phage~Twister6	Caudovirales	Siphoviridae	Wizardvirus	259_0	Clustered	2	VC_259_0	2	0.4026	0.94472031	0.3803	1	1	1	1.0
699	Gordonia~phage~UmaThurman	Caudovirales	Siphoviridae	Unassigned	257_0	Clustered	7	VC_257_0	7	0.753	1.0	0.753	1	1	1	1.0
700	Gordonia~phage~Utz	Caudovirales	Siphoviridae	Unassigned	257_0	Clustered	7	VC_257_0	7	0.753	1.0	0.753	1	1	1	1.0
701	Gordonia~phage~Vendetta	Caudovirales	Siphoviridae	Vendettavirus	91_0	Clustered	3	VC_91_0	3	0.8037	0.9971824	0.8014	2	1	1	1.0
702	Gordonia~phage~Vivi2	Caudovirales	Siphoviridae	Vividuovirus	265_0	Clustered	5	VC_265_0	5	0.8122	0.99990968	0.8121	2	1	1	1.0
703	Gordonia~phage~Wizard	Caudovirales	Siphoviridae	Wizardvirus	259_0	Clustered	2	VC_259_0	2	0.4026	0.94472031	0.3803	1	1	1	1.0
704	Gordonia~phage~Woes	Caudovirales	Siphoviridae	Woesvirus	268_3	Clustered	3	VC_268_3	3	0.163	0.99784056	0.1626	1	1	1	1.0
705	Gordonia~phage~Yeezy	Caudovirales	Siphoviridae	Baxtervirus	255_1	Clustered	5	VC_255_1	5	0.4845	0.99999991	0.4845	2	1	1	1.0
706	Gordonia~phage~Zirinka	Caudovirales	Siphoviridae	Nymphadoravirus	255_1	Clustered	5	VC_255_1	5	0.4845	0.99999991	0.4845	2	1	1	1.0
707	Guinea~pig~Chlamydia~phage	Unassigned	Microviridae	Chlamydiamicrovirus	79_0	Clustered	12	VC_79_0	12	0.7885	1.0	0.7885	3	1	1	1.0
708	Haemophilus~phage~Aaphi23	Caudovirales	Myoviridae	Unassigned	14_0	Clustered	2	VC_14_0	2	0.5912	0.9374548	0.5543	1	1	1	1.0
709	Haemophilus~virus~HP1	Caudovirales	Myoviridae	Hp1virus	76_0	Clustered	7	VC_76_0	7	0.558	1.0	0.558	2	1	1	1.0
710	Haemophilus~virus~HP2	Caudovirales	Myoviridae	Hp1virus	76_0	Clustered	7	VC_76_0	7	0.558	1.0	0.558	2	1	1	1.0
711	Haloarcula~californiae~icosahedral~virus~1	Unassigned	Sphaerolipoviridae	Alphasphaerolipovirus	280_0	Clustered	4	VC_280_0	4	1.0	1.0	1.0	1	1	1	1.0
712	Haloarcula~hispanica~icosahedral~virus~2	Unassigned	Sphaerolipoviridae	Alphasphaerolipovirus	280_0	Clustered	4	VC_280_0	4	1.0	1.0	1.0	1	1	1	1.0
713	Haloarcula~hispanica~pleomorphic~virus~1	Unassigned	Pleolipoviridae	Alphapleolipovirus	281_0	Clustered	2	VC_281_0	2	0.5084	0.89435023	0.4547	1	1	1	1.0
714	Haloarcula~hispanica~pleomorphic~virus~2	Unassigned	Pleolipoviridae	Alphapleolipovirus	281_0	Clustered	2	VC_281_0	2	0.5084	0.89435023	0.4547	1	1	1	1.0
715	Haloarcula~hispanica~virus~PH1	Unassigned	Sphaerolipoviridae	Alphasphaerolipovirus	280_0	Clustered	4	VC_280_0	4	1.0	1.0	1.0	1	1	1	1.0
716	Haloarcula~hispanica~virus~SH1	Unassigned	Sphaerolipoviridae	Alphasphaerolipovirus	280_0	Clustered	4	VC_280_0	4	1.0	1.0	1.0	1	1	1	1.0
717	Halomonas~virus~HAP1	Caudovirales	Myoviridae	Hapunavirus	185_0	Clustered	2	VC_185_0	2	0.221	0.94920425	0.2097	1	1	1	1.0
718	Halorubrum~phage~CGphi46	Unassigned	Unassigned	Unassigned	87_0	Clustered	2	VC_87_0	2	0.8389	0.72985431	0.6123	1	2	2	1.0
719	Halorubrum~phage~HF2	Unassigned	Unassigned	Unassigned	284_0	Clustered	4	VC_284_0	4	0.7438	0.99976889	0.7437	1	1	1	1.0
720	Halovirus~HCTV-1	Unassigned	Unassigned	Unassigned	283_0	Clustered	3	VC_283_0	3	0.8873	0.99188498	0.8801	1	1	1	1.0
721	Halovirus~HCTV-2	Unassigned	Unassigned	Unassigned	286_0	Clustered	2	VC_286_0	2	0.4767	0.85557782	0.4079	1	1	1	1.0
722	Halovirus~HCTV-5	Unassigned	Unassigned	Unassigned	283_0	Clustered	3	VC_283_0	3	0.8873	0.99188498	0.8801	1	1	1	1.0
723	Halovirus~HF1	Unassigned	Unassigned	Unassigned	284_0	Clustered	4	VC_284_0	4	0.7438	0.99976889	0.7437	1	1	1	1.0
724	Halovirus~HHTV-2	Unassigned	Unassigned	Unassigned	286_0	Clustered	2	VC_286_0	2	0.4767	0.85557782	0.4079	1	1	1	1.0
725	Halovirus~HRTV-5	Unassigned	Unassigned	Unassigned	284_0	Clustered	4	VC_284_0	4	0.7438	0.99976889	0.7437	1	1	1	1.0
726	Halovirus~HRTV-8	Unassigned	Unassigned	Unassigned	284_0	Clustered	4	VC_284_0	4	0.7438	0.99976889	0.7437	1	1	1	1.0
727	Halovirus~HVTV-1	Unassigned	Unassigned	Unassigned	283_0	Clustered	3	VC_283_0	3	0.8873	0.99188498	0.8801	1	1	1	1.0
728	Hamiltonella~virus~APSE1	Caudovirales	Podoviridae	Unassigned	156_0	Clustered	2	VC_156_0	2	0.1374	0.95142376	0.1308	1	1	1	1.0
729	Helicobacter~phage~1961P	Caudovirales	Podoviridae	Una961virus	287_0	Clustered	4	VC_287_0	4	1.0	1.0	1.0	2	1	1	1.0
730	Helicobacter~phage~KHP30	Caudovirales	Podoviridae	Una961virus	287_0	Clustered	4	VC_287_0	4	1.0	1.0	1.0	2	1	1	1.0
731	Helicobacter~phage~KHP40	Caudovirales	Podoviridae	Una961virus	287_0	Clustered	4	VC_287_0	4	1.0	1.0	1.0	2	1	1	1.0
732	Helicobacter~phage~phiHP33	Caudovirales	Podoviridae	Schmidvirus	287_0	Clustered	4	VC_287_0	4	1.0	1.0	1.0	2	1	1	1.0
733	Idiomarinaceae~phage~1N2-2	Caudovirales	Siphoviridae	Unassigned	172_0	Clustered	3	VC_172_0	3	0.5243	0.98018259	0.5139	1	1	1	1.0
734	Idiomarinaceae~phage~Phi1M2-2	Caudovirales	Siphoviridae	Unassigned	65_0	Clustered	3	VC_65_0	3	0.1934	0.98914534	0.1913	1	1	1	1.0
735	Iodobacteriophage~phiPLPE	Caudovirales	Myoviridae	Unassigned	70_0	Clustered	8	VC_70_0	8	0.8477	1.0	0.8477	3	1	1	0.7857
736	Klebsiella~phage~1513	Caudovirales	Siphoviridae	Kp36virus	69_0	Clustered	32	VC_69_0	32	0.9801	1.0	0.9801	10	1	1	0.9435
737	Klebsiella~phage~JD001	Caudovirales	Myoviridae	Jedunavirus	70_0	Clustered	8	VC_70_0	8	0.8477	1.0	0.8477	3	1	1	0.7857
738	Klebsiella~phage~JD18	Caudovirales	Myoviridae	Jd18virus	41_9	Clustered	2	VC_41_9	2	0.0109	0.95424432	0.0104	2	1	1	1.0
739	Klebsiella~phage~K11	Caudovirales	Podoviridae	Kp32virus	206_0	Clustered	60	VC_206_0	60	0.9832	1.0	0.9832	4	1	1	1.0
740	Klebsiella~phage~K5	Caudovirales	Podoviridae	Kp32virus	206_0	Clustered	60	VC_206_0	60	0.9832	1.0	0.9832	4	1	1	1.0
741	Klebsiella~phage~KLPN1	Caudovirales	Siphoviridae	Kp36virus	69_0	Clustered	32	VC_69_0	32	0.9801	1.0	0.9801	10	1	1	0.9435
742	Klebsiella~phage~KP15	Caudovirales	Myoviridae	Kp15virus	44_0	Clustered	6	VC_44_0	6	0.1523	1.0	0.1523	2	1	1	1.0
743	Klebsiella~phage~KP27	Caudovirales	Myoviridae	Kp15virus	44_0	Clustered	6	VC_44_0	6	0.1523	1.0	0.1523	2	1	1	1.0
744	Klebsiella~phage~KP32	Caudovirales	Podoviridae	Kp32virus	206_0	Clustered	60	VC_206_0	60	0.9832	1.0	0.9832	4	1	1	1.0
745	Klebsiella~phage~KP36	Caudovirales	Siphoviridae	Kp36virus	69_0	Clustered	32	VC_69_0	32	0.9801	1.0	0.9801	10	1	1	0.9435
746	Klebsiella~phage~Matisse	Caudovirales	Myoviridae	Kp15virus	44_0	Clustered	6	VC_44_0	6	0.1523	1.0	0.1523	2	1	1	1.0
747	Klebsiella~phage~Miro	Caudovirales	Myoviridae	Kp15virus	44_0	Clustered	6	VC_44_0	6	0.1523	1.0	0.1523	2	1	1	1.0
748	Klebsiella~phage~PKO111	Caudovirales	Myoviridae	Jd18virus	41_10	Clustered/Singleton	1	VC_41_10	1	0.0	1.0	0.0	1	1	1	1.0
749	Klebsiella~phage~PKP126	Caudovirales	Siphoviridae	Kp36virus	69_0	Clustered	32	VC_69_0	32	0.9801	1.0	0.9801	10	1	1	0.9435
750	Klebsiella~phage~PMBT1	Caudovirales	Myoviridae	Slopekvirus	44_0	Clustered	6	VC_44_0	6	0.1523	1.0	0.1523	2	1	1	1.0
751	Klebsiella~phage~Sugarland	Caudovirales	Siphoviridae	Sugarlandvirus	252_1	Clustered	2	VC_252_1	2	0.049	0.95108637	0.0466	1	1	1	1.0
752	Klebsiella~phage~Sushi	Caudovirales	Siphoviridae	Kp36virus	69_0	Clustered	32	VC_69_0	32	0.9801	1.0	0.9801	10	1	1	0.9435
753	Klebsiella~phage~phiKO2	Caudovirales	Siphoviridae	Unassigned	177_0	Clustered	2	VC_177_0	2	0.2139	0.94154258	0.2014	1	1	1	1.0
754	Klebsiella~phage~vB_Kp1	Caudovirales	Podoviridae	Kp32virus	206_0	Clustered	60	VC_206_0	60	0.9832	1.0	0.9832	4	1	1	1.0
755	Klebsiella~phage~vB_KpnM_KpV477	Caudovirales	Myoviridae	Jiaodavirus	41_9	Clustered	2	VC_41_9	2	0.0109	0.95424432	0.0104	2	1	1	1.0
756	Klebsiella~phage~vB_KpnM_KpV52	Caudovirales	Myoviridae	Jedunavirus	70_0	Clustered	8	VC_70_0	8	0.8477	1.0	0.8477	3	1	1	0.7857
757	Klebsiella~phage~vB_KpnM_KpV79	Caudovirales	Myoviridae	Jedunavirus	70_0	Clustered	8	VC_70_0	8	0.8477	1.0	0.8477	3	1	1	0.7857
758	Klebsiella~phage~vB_KpnP_KpV289	Caudovirales	Podoviridae	Kp32virus	206_0	Clustered	60	VC_206_0	60	0.9832	1.0	0.9832	4	1	1	1.0
759	Klebsiella~phage~vB_Kpn_IME260	Caudovirales	Siphoviridae	Sugarlandvirus	252_1	Clustered	2	VC_252_1	2	0.049	0.95108637	0.0466	1	1	1	1.0
760	Klebsiella~virus~0507KN21	Caudovirales	Ackermannviridae	Unassigned	33_1	Clustered	21	VC_33_1	21	0.8138	1.0	0.8138	5	1	1	0.819
761	Kluyvera~phage~Kvp1	Caudovirales	Podoviridae	T7virus	206_0	Clustered	60	VC_206_0	60	0.9832	1.0	0.9832	4	1	1	1.0
762	Lactobacillus~phage~A2	Caudovirales	Siphoviridae	Unassigned	236_0	Clustered	6	VC_236_0	6	0.3597	1.0	0.3597	1	1	1	1.0
763	Lactobacillus~phage~J-1	Caudovirales	Siphoviridae	Unassigned	236_0	Clustered	6	VC_236_0	6	0.3597	1.0	0.3597	1	1	1	1.0
764	Lactobacillus~phage~JCL1032	Caudovirales	Siphoviridae	Unassigned	116_0	Clustered	3	VC_116_0	3	0.2364	0.99818322	0.236	1	1	1	1.0
765	Lactobacillus~phage~KC5a	Caudovirales	Myoviridae	Unassigned	164_0	Clustered	4	VC_164_0	4	0.7455	0.99996137	0.7454	1	1	1	1.0
766	Lactobacillus~phage~LBR48	Caudovirales	Myoviridae	Unassigned	234_0	Clustered	2	VC_234_0	2	0.4956	0.89435023	0.4433	1	2	1	1.0
767	Lactobacillus~phage~LF1	Caudovirales	Siphoviridae	Unassigned	288_0	Clustered	2	VC_288_0	2	0.1799	0.93722274	0.1686	1	1	1	1.0
768	Lactobacillus~phage~LL-H	Caudovirales	Siphoviridae	Unassigned	116_0	Clustered	3	VC_116_0	3	0.2364	0.99818322	0.236	1	1	1	1.0
769	Lactobacillus~phage~Lc-Nu	Caudovirales	Siphoviridae	Unassigned	236_0	Clustered	6	VC_236_0	6	0.3597	1.0	0.3597	1	1	1	1.0
770	Lactobacillus~phage~Ld17	Caudovirales	Siphoviridae	C5virus	250_0	Clustered	6	VC_250_0	6	0.9929	0.99987807	0.9928	1	1	1	1.0
771	Lactobacillus~phage~Ld25A	Caudovirales	Siphoviridae	C5virus	250_0	Clustered	6	VC_250_0	6	0.9929	0.99987807	0.9928	1	1	1	1.0
772	Lactobacillus~phage~Ld3	Caudovirales	Siphoviridae	C5virus	250_0	Clustered	6	VC_250_0	6	0.9929	0.99987807	0.9928	1	1	1	1.0
773	Lactobacillus~phage~Lrm1	Caudovirales	Siphoviridae	Unassigned	236_0	Clustered	6	VC_236_0	6	0.3597	1.0	0.3597	1	1	1	1.0
774	Lactobacillus~phage~PL-1	Caudovirales	Siphoviridae	Unassigned	236_0	Clustered	6	VC_236_0	6	0.3597	1.0	0.3597	1	1	1	1.0
775	Lactobacillus~phage~PLE2	Caudovirales	Siphoviridae	Unassigned	130_0	Clustered	2	VC_130_0	2	0.3963	0.93376822	0.37	1	1	1	1.0
776	Lactobacillus~phage~iA2	Caudovirales	Siphoviridae	Unassigned	130_0	Clustered	2	VC_130_0	2	0.3963	0.93376822	0.37	1	1	1	1.0
777	Lactobacillus~phage~phi~jlb1	Caudovirales	Myoviridae	Unassigned	164_0	Clustered	4	VC_164_0	4	0.7455	0.99996137	0.7454	1	1	1	1.0
778	Lactobacillus~phage~phiAQ113	Caudovirales	Myoviridae	Unassigned	164_0	Clustered	4	VC_164_0	4	0.7455	0.99996137	0.7454	1	1	1	1.0
779	Lactobacillus~phage~phiAT3	Caudovirales	Siphoviridae	Unassigned	236_0	Clustered	6	VC_236_0	6	0.3597	1.0	0.3597	1	1	1	1.0
780	Lactobacillus~phage~phiJB	Caudovirales	Siphoviridae	Unassigned	116_0	Clustered	3	VC_116_0	3	0.2364	0.99818322	0.236	1	1	1	1.0
781	Lactobacillus~phage~phiLdb	Caudovirales	Siphoviridae	C5virus	250_0	Clustered	6	VC_250_0	6	0.9929	0.99987807	0.9928	1	1	1	1.0
782	Lactobacillus~phage~phiPYB5	Caudovirales	Siphoviridae	Unassigned	288_0	Clustered	2	VC_288_0	2	0.1799	0.93722274	0.1686	1	1	1	1.0
783	Lactobacillus~prophage~Lj771	Caudovirales	Myoviridae	Unassigned	164_0	Clustered	4	VC_164_0	4	0.7455	0.99996137	0.7454	1	1	1	1.0
784	Lactobacillus~virus~ATCC8014	Caudovirales	Siphoviridae	Phijl1virus	246_0	Clustered	3	VC_246_0	3	0.8701	0.99287596	0.8639	1	1	1	1.0
785	Lactobacillus~virus~LLKu	Caudovirales	Siphoviridae	C5virus	250_0	Clustered	6	VC_250_0	6	0.9929	0.99987807	0.9928	1	1	1	1.0
786	Lactobacillus~virus~c5	Caudovirales	Siphoviridae	C5virus	250_0	Clustered	6	VC_250_0	6	0.9929	0.99987807	0.9928	1	1	1	1.0
787	Lactobacillus~virus~phiJL1	Caudovirales	Siphoviridae	Phijl1virus	246_0	Clustered	3	VC_246_0	3	0.8701	0.99287596	0.8639	1	1	1	1.0
788	Lactococcus~phage~1358	Caudovirales	Siphoviridae	Unassigned	4_0	Clustered	3	VC_4_0	3	0.4675	0.99539305	0.4653	1	1	1	1.0
789	Lactococcus~phage~340	Caudovirales	Siphoviridae	Skunavirus	293_0	Clustered	18	VC_293_0	18	0.9986	0.99999994	0.9986	2	1	1	1.0
790	Lactococcus~phage~949	Caudovirales	Siphoviridae	Unassigned	148_0	Clustered	3	VC_148_0	3	0.7004	0.99659404	0.698	1	1	1	1.0
791	Lactococcus~phage~BM13	Caudovirales	Siphoviridae	Unassigned	291_0	Clustered	3	VC_291_0	3	0.065	0.9518058	0.0619	1	1	1	0.6667
792	Lactococcus~phage~D4410	Caudovirales	Siphoviridae	Ceduovirus	294_0	Clustered	7	VC_294_0	7	0.9609	0.99999932	0.9609	2	1	1	1.0
793	Lactococcus~phage~D4412	Caudovirales	Siphoviridae	Ceduovirus	294_0	Clustered	7	VC_294_0	7	0.9609	0.99999932	0.9609	2	1	1	1.0
794	Lactococcus~phage~GE1	Caudovirales	Siphoviridae	Unassigned	295_0	Clustered	2	VC_295_0	2	0.0236	0.71861548	0.0169	1	1	1	1.0
795	Lactococcus~phage~M5938	Caudovirales	Siphoviridae	Ceduovirus	294_0	Clustered	7	VC_294_0	7	0.9609	0.99999932	0.9609	2	1	1	1.0
796	Lactococcus~phage~M6162	Caudovirales	Siphoviridae	Ceduovirus	294_0	Clustered	7	VC_294_0	7	0.9609	0.99999932	0.9609	2	1	1	1.0
797	Lactococcus~phage~M6165	Caudovirales	Siphoviridae	Ceduovirus	294_0	Clustered	7	VC_294_0	7	0.9609	0.99999932	0.9609	2	1	1	1.0
798	Lactococcus~phage~P078	Caudovirales	Siphoviridae	Unassigned	101_0	Clustered	4	VC_101_0	4	0.5785	0.99995692	0.5785	1	1	1	1.0
799	Lactococcus~phage~P092	Caudovirales	Siphoviridae	Unassigned	101_0	Clustered	4	VC_101_0	4	0.5785	0.99995692	0.5785	1	1	1	1.0
800	Lactococcus~phage~P118	Caudovirales	Siphoviridae	Unassigned	101_0	Clustered	4	VC_101_0	4	0.5785	0.99995692	0.5785	1	1	1	1.0
801	Lactococcus~phage~P162	Caudovirales	Siphoviridae	Unassigned	101_0	Clustered	4	VC_101_0	4	0.5785	0.99995692	0.5785	1	1	1	1.0
802	Lactococcus~phage~P680	Caudovirales	Siphoviridae	Skunavirus	293_0	Clustered	18	VC_293_0	18	0.9986	0.99999994	0.9986	2	1	1	1.0
803	Lactococcus~phage~Q54	Caudovirales	Siphoviridae	Unassigned	295_0	Clustered	2	VC_295_0	2	0.0236	0.71861548	0.0169	1	1	1	1.0
804	Lactococcus~phage~WRP3	Caudovirales	Siphoviridae	Unassigned	148_0	Clustered	3	VC_148_0	3	0.7004	0.99659404	0.698	1	1	1	1.0
805	Lactococcus~phage~bIL285	Caudovirales	Siphoviridae	Unassigned	291_0	Clustered	3	VC_291_0	3	0.065	0.9518058	0.0619	1	1	1	0.6667
806	Lactococcus~phage~bIL309	Caudovirales	Siphoviridae	Unassigned	291_0	Clustered	3	VC_291_0	3	0.065	0.9518058	0.0619	1	1	1	0.6667
807	Lactococcus~phage~bIL310	Caudovirales	Siphoviridae	Unassigned	296_0	Clustered	2	VC_296_0	2	1.0	1.0	1.0	1	1	1	1.0
808	Lactococcus~phage~bIL312	Caudovirales	Siphoviridae	Unassigned	296_0	Clustered	2	VC_296_0	2	1.0	1.0	1.0	1	1	1	1.0
809	Lactococcus~phage~jm2	Caudovirales	Siphoviridae	Skunavirus	293_0	Clustered	18	VC_293_0	18	0.9986	0.99999994	0.9986	2	1	1	1.0
810	Lactococcus~phage~jm3	Caudovirales	Siphoviridae	Skunavirus	293_0	Clustered	18	VC_293_0	18	0.9986	0.99999994	0.9986	2	1	1	1.0
811	Lactococcus~phage~phi7	Caudovirales	Siphoviridae	Skunavirus	293_0	Clustered	18	VC_293_0	18	0.9986	0.99999994	0.9986	2	1	1	1.0
812	Lactococcus~phage~phiL47	Caudovirales	Siphoviridae	Unassigned	148_0	Clustered	3	VC_148_0	3	0.7004	0.99659404	0.698	1	1	1	1.0
813	Lactococcus~virus~712	Caudovirales	Siphoviridae	Sk1virus	293_0	Clustered	18	VC_293_0	18	0.9986	0.99999994	0.9986	2	1	1	1.0
814	Lactococcus~virus~ASCC191	Caudovirales	Siphoviridae	Sk1virus	293_0	Clustered	18	VC_293_0	18	0.9986	0.99999994	0.9986	2	1	1	1.0
815	Lactococcus~virus~Bibb29	Caudovirales	Siphoviridae	Sk1virus	293_0	Clustered	18	VC_293_0	18	0.9986	0.99999994	0.9986	2	1	1	1.0
816	Lactococcus~virus~CB13	Caudovirales	Siphoviridae	Sk1virus	293_0	Clustered	18	VC_293_0	18	0.9986	0.99999994	0.9986	2	1	1	1.0
817	Lactococcus~virus~CB14	Caudovirales	Siphoviridae	Sk1virus	293_0	Clustered	18	VC_293_0	18	0.9986	0.99999994	0.9986	2	1	1	1.0
818	Lactococcus~virus~CB19	Caudovirales	Siphoviridae	Sk1virus	293_0	Clustered	18	VC_293_0	18	0.9986	0.99999994	0.9986	2	1	1	1.0
819	Lactococcus~virus~CB20	Caudovirales	Siphoviridae	Sk1virus	293_0	Clustered	18	VC_293_0	18	0.9986	0.99999994	0.9986	2	1	1	1.0
820	Lactococcus~virus~P008	Caudovirales	Siphoviridae	Sk1virus	293_0	Clustered	18	VC_293_0	18	0.9986	0.99999994	0.9986	2	1	1	1.0
821	Lactococcus~virus~P2	Caudovirales	Siphoviridae	Sk1virus	293_0	Clustered	18	VC_293_0	18	0.9986	0.99999994	0.9986	2	1	1	1.0
822	Lactococcus~virus~Sl4	Caudovirales	Siphoviridae	Sk1virus	293_0	Clustered	18	VC_293_0	18	0.9986	0.99999994	0.9986	2	1	1	1.0
823	Lactococcus~virus~bIL170	Caudovirales	Siphoviridae	Sk1virus	293_0	Clustered	18	VC_293_0	18	0.9986	0.99999994	0.9986	2	1	1	1.0
824	Lactococcus~virus~bIL67	Caudovirales	Siphoviridae	C2virus	294_0	Clustered	7	VC_294_0	7	0.9609	0.99999932	0.9609	2	1	1	1.0
825	Lactococcus~virus~c2	Caudovirales	Siphoviridae	C2virus	294_0	Clustered	7	VC_294_0	7	0.9609	0.99999932	0.9609	2	1	1	1.0
826	Lactococcus~virus~jj50	Caudovirales	Siphoviridae	Sk1virus	293_0	Clustered	18	VC_293_0	18	0.9986	0.99999994	0.9986	2	1	1	1.0
827	Lactococcus~virus~sk1	Caudovirales	Siphoviridae	Sk1virus	293_0	Clustered	18	VC_293_0	18	0.9986	0.99999994	0.9986	2	1	1	1.0
828	Lelliottia~phage~phD2B	Caudovirales	Podoviridae	Zindervirus	245_0	Clustered	15	VC_245_0	15	1.0	1.0	1.0	2	1	1	1.0
829	Lepus~americanus~faeces~associated~microvirus~SHP1~6472	Unassigned	Microviridae	Unassigned	81_0	Clustered	5	VC_81_0	5	0.455	0.99999974	0.455	1	1	1	1.0
830	Leuconostoc~phage~1-A4	Caudovirales	Siphoviridae	Una4virus	298_0	Clustered	7	VC_298_0	7	0.627	1.0	0.627	2	1	1	1.0
831	Leuconostoc~phage~Lmd1	Caudovirales	Siphoviridae	Lmd1virus	297_0	Clustered	6	VC_297_0	6	0.5718	0.99999999	0.5718	1	1	1	1.0
832	Leuconostoc~phage~Ln-8	Caudovirales	Siphoviridae	Una4virus	298_0	Clustered	7	VC_298_0	7	0.627	1.0	0.627	2	1	1	1.0
833	Leuconostoc~phage~Ln-9	Caudovirales	Siphoviridae	Una4virus	298_0	Clustered	7	VC_298_0	7	0.627	1.0	0.627	2	1	1	1.0
834	Leuconostoc~phage~P793	Caudovirales	Siphoviridae	Lmd1virus	297_0	Clustered	6	VC_297_0	6	0.5718	0.99999999	0.5718	1	1	1	1.0
835	Leuconostoc~phage~phiLN03	Caudovirales	Siphoviridae	Lmd1virus	297_0	Clustered	6	VC_297_0	6	0.5718	0.99999999	0.5718	1	1	1	1.0
836	Leuconostoc~phage~phiLN04	Caudovirales	Siphoviridae	Lmd1virus	297_0	Clustered	6	VC_297_0	6	0.5718	0.99999999	0.5718	1	1	1	1.0
837	Leuconostoc~phage~phiLN12	Caudovirales	Siphoviridae	Lmd1virus	297_0	Clustered	6	VC_297_0	6	0.5718	0.99999999	0.5718	1	1	1	1.0
838	Leuconostoc~phage~phiLN25	Caudovirales	Siphoviridae	Una4virus	298_0	Clustered	7	VC_298_0	7	0.627	1.0	0.627	2	1	1	1.0
839	Leuconostoc~phage~phiLN34	Caudovirales	Siphoviridae	Una4virus	298_0	Clustered	7	VC_298_0	7	0.627	1.0	0.627	2	1	1	1.0
840	Leuconostoc~phage~phiLN6B	Caudovirales	Siphoviridae	Lmd1virus	297_0	Clustered	6	VC_297_0	6	0.5718	0.99999999	0.5718	1	1	1	1.0
841	Leuconostoc~phage~phiLNTR2	Caudovirales	Siphoviridae	Unaquatrovirus	298_0	Clustered	7	VC_298_0	7	0.627	1.0	0.627	2	1	1	1.0
842	Leuconostoc~phage~phiLNTR3	Caudovirales	Siphoviridae	Una4virus	298_0	Clustered	7	VC_298_0	7	0.627	1.0	0.627	2	1	1	1.0
843	Liberibacter~phage~SC1	Caudovirales	Podoviridae	Unassigned	162_0	Clustered	2	VC_162_0	2	0.6966	0.92263554	0.6427	1	1	1	1.0
844	Liberibacter~phage~SC2	Caudovirales	Podoviridae	Unassigned	162_0	Clustered	2	VC_162_0	2	0.6966	0.92263554	0.6427	1	1	1	1.0
845	Listeria~phage~A006	Caudovirales	Siphoviridae	Unassigned	118_0	Clustered	6	VC_118_0	6	0.7465	1.0	0.7465	1	1	1	0.6667
846	Listeria~phage~A118	Caudovirales	Siphoviridae	Unassigned	118_0	Clustered	6	VC_118_0	6	0.7465	1.0	0.7465	1	1	1	0.6667
847	Listeria~phage~A500	Caudovirales	Siphoviridae	Unassigned	118_0	Clustered	6	VC_118_0	6	0.7465	1.0	0.7465	1	1	1	0.6667
848	Listeria~phage~B025	Caudovirales	Siphoviridae	Psavirus	149_0	Clustered	4	VC_149_0	4	0.5092	0.99997834	0.5092	1	1	1	1.0
849	Listeria~phage~B054	Caudovirales	Siphoviridae	Unassigned	234_0	Clustered	2	VC_234_0	2	0.4956	0.89435023	0.4433	1	2	1	1.0
850	Listeria~phage~LMSP-25	Caudovirales	Herelleviridae	Pecentumvirus	123_0	Clustered	11	VC_123_0	11	0.5341	1.0	0.5341	2	2	1	1.0
851	Listeria~phage~LMTA-148	Caudovirales	Herelleviridae	Pecentumvirus	123_0	Clustered	11	VC_123_0	11	0.5341	1.0	0.5341	2	2	1	1.0
852	Listeria~phage~LMTA-34	Caudovirales	Herelleviridae	Pecentumvirus	123_0	Clustered	11	VC_123_0	11	0.5341	1.0	0.5341	2	2	1	1.0
853	Listeria~phage~LP-026	Caudovirales	Siphoviridae	P70virus	140_0	Clustered	5	VC_140_0	5	0.8861	0.99999936	0.8861	1	1	1	1.0
854	Listeria~phage~LP-030-2	Caudovirales	Siphoviridae	Psavirus	149_0	Clustered	4	VC_149_0	4	0.5092	0.99997834	0.5092	1	1	1	1.0
855	Listeria~phage~LP-030-3	Caudovirales	Siphoviridae	Unassigned	118_0	Clustered	6	VC_118_0	6	0.7465	1.0	0.7465	1	1	1	0.6667
856	Listeria~phage~LP-037	Caudovirales	Siphoviridae	P70virus	140_0	Clustered	5	VC_140_0	5	0.8861	0.99999936	0.8861	1	1	1	1.0
857	Listeria~phage~LP-048	Caudovirales	Herelleviridae	Pecentumvirus	123_0	Clustered	11	VC_123_0	11	0.5341	1.0	0.5341	2	2	1	1.0
858	Listeria~phage~LP-064	Caudovirales	Herelleviridae	Pecentumvirus	123_0	Clustered	11	VC_123_0	11	0.5341	1.0	0.5341	2	2	1	1.0
859	Listeria~phage~LP-083-2	Caudovirales	Herelleviridae	Pecentumvirus	123_0	Clustered	11	VC_123_0	11	0.5341	1.0	0.5341	2	2	1	1.0
860	Listeria~phage~LP-101	Caudovirales	Siphoviridae	Psavirus	149_0	Clustered	4	VC_149_0	4	0.5092	0.99997834	0.5092	1	1	1	1.0
861	Listeria~phage~LP-110	Caudovirales	Siphoviridae	P70virus	140_0	Clustered	5	VC_140_0	5	0.8861	0.99999936	0.8861	1	1	1	1.0
862	Listeria~phage~LP-114	Caudovirales	Siphoviridae	P70virus	140_0	Clustered	5	VC_140_0	5	0.8861	0.99999936	0.8861	1	1	1	1.0
863	Listeria~phage~LP-125	Caudovirales	Myoviridae	P100virus	123_0	Clustered	11	VC_123_0	11	0.5341	1.0	0.5341	2	2	1	1.0
864	Listeria~phage~List-36	Caudovirales	Herelleviridae	Pecentumvirus	123_0	Clustered	11	VC_123_0	11	0.5341	1.0	0.5341	2	2	1	1.0
865	Listeria~phage~P35	Caudovirales	Siphoviridae	Unassigned	4_0	Clustered	3	VC_4_0	3	0.4675	0.99539305	0.4653	1	1	1	1.0
866	Listeria~phage~P40	Caudovirales	Siphoviridae	Unassigned	4_0	Clustered	3	VC_4_0	3	0.4675	0.99539305	0.4653	1	1	1	1.0
867	Listeria~phage~P70	Caudovirales	Siphoviridae	P70virus	140_0	Clustered	5	VC_140_0	5	0.8861	0.99999936	0.8861	1	1	1	1.0
868	Listeria~phage~PSA	Caudovirales	Siphoviridae	Psavirus	149_0	Clustered	4	VC_149_0	4	0.5092	0.99997834	0.5092	1	1	1	1.0
869	Listeria~phage~vB_LmoM_AG20	Caudovirales	Herelleviridae	Pecentumvirus	123_0	Clustered	11	VC_123_0	11	0.5341	1.0	0.5341	2	2	1	1.0
870	Listeria~phage~vB_LmoS_188	Caudovirales	Siphoviridae	Unassigned	118_0	Clustered	6	VC_118_0	6	0.7465	1.0	0.7465	1	1	1	0.6667
871	Listeria~phage~vB_LmoS_293	Caudovirales	Siphoviridae	Unassigned	118_0	Clustered	6	VC_118_0	6	0.7465	1.0	0.7465	1	1	1	0.6667
872	Listeria~virus~A511	Caudovirales	Myoviridae	P100virus	123_0	Clustered	11	VC_123_0	11	0.5341	1.0	0.5341	2	2	1	1.0
873	Listeria~virus~P100	Caudovirales	Myoviridae	P100virus	123_0	Clustered	11	VC_123_0	11	0.5341	1.0	0.5341	2	2	1	1.0
874	Lynx~canadensis~associated~microvirus~CLP~9413	Unassigned	Microviridae	Unassigned	80_0	Clustered	6	VC_80_0	6	0.4882	0.99999998	0.4882	1	1	1	1.0
875	Mannheimia~phage~vB_MhM_587AP1	Caudovirales	Myoviridae	Peduovirus	75_0	Clustered	29	VC_75_0	29	0.8383	1.0	0.8383	2	1	1	1.0
876	Mannheimia~phage~vB_MhS_1152AP2	Caudovirales	Siphoviridae	Unassigned	71_0	Clustered	3	VC_71_0	3	0.4845	0.9981953	0.4836	1	1	1	0.6667
877	Mannheimia~phage~vB_MhS_535AP2	Caudovirales	Siphoviridae	Unassigned	71_0	Clustered	3	VC_71_0	3	0.4845	0.9981953	0.4836	1	1	1	0.6667
878	Mannheimia~phage~vB_MhS_587AP2	Caudovirales	Siphoviridae	Unassigned	71_0	Clustered	3	VC_71_0	3	0.4845	0.9981953	0.4836	1	1	1	0.6667
879	Mannheimia~virus~PHL101	Caudovirales	Myoviridae	P2virus	75_0	Clustered	29	VC_75_0	29	0.8383	1.0	0.8383	2	1	1	1.0
880	Marine~gokushovirus	Unassigned	Microviridae	Unassigned	79_0	Clustered	12	VC_79_0	12	0.7885	1.0	0.7885	3	1	1	1.0
881	Marinomonas~phage~P12026	Caudovirales	Siphoviridae	Unassigned	172_0	Clustered	3	VC_172_0	3	0.5243	0.98018259	0.5139	1	1	1	1.0
882	Methanobacterium~phage~psiM2	Caudovirales	Siphoviridae	Unassigned	299_0	Clustered	2	VC_299_0	2	1.0	1.0	1.0	1	1	1	1.0
883	Methanothermobacter~phage~psiM100	Caudovirales	Siphoviridae	Unassigned	299_0	Clustered	2	VC_299_0	2	1.0	1.0	1.0	1	1	1	1.0
884	Microbacterium~phage~Eleri	Caudovirales	Siphoviridae	Elerivirus	301_0	Clustered	6	VC_301_0	6	1.0	1.0	1.0	4	1	1	1.0
885	Microbacterium~phage~Golden	Caudovirales	Siphoviridae	Kojivirus	301_0	Clustered	6	VC_301_0	6	1.0	1.0	1.0	4	1	1	1.0
886	Microbacterium~phage~Hamlet	Caudovirales	Siphoviridae	Ilzatvirus	301_0	Clustered	6	VC_301_0	6	1.0	1.0	1.0	4	1	1	1.0
887	Microbacterium~phage~Ilzat	Caudovirales	Siphoviridae	Ilzatvirus	301_0	Clustered	6	VC_301_0	6	1.0	1.0	1.0	4	1	1	1.0
888	Microbacterium~phage~Koji	Caudovirales	Siphoviridae	Kojivirus	301_0	Clustered	6	VC_301_0	6	1.0	1.0	1.0	4	1	1	1.0
889	Microbacterium~phage~Pikmin	Caudovirales	Siphoviridae	Pikminvirus	301_0	Clustered	6	VC_301_0	6	1.0	1.0	1.0	4	1	1	1.0
890	Microbacterium~phage~vB_MoxS-ISF9	Caudovirales	Siphoviridae	Unassigned	96_0	Clustered	3	VC_96_0	3	0.5813	0.95335502	0.5542	3	1	1	1.0
891	Microcystis~phage~MaMV-DC	Caudovirales	Myoviridae	Unassigned	302_0	Clustered	2	VC_302_0	2	1.0	1.0	1.0	1	1	1	1.0
892	Microcystis~virus~Ma-LMM01	Caudovirales	Myoviridae	Unassigned	302_0	Clustered	2	VC_302_0	2	1.0	1.0	1.0	1	1	1	1.0
893	Microviridae~Bog1249_12	Unassigned	Microviridae	Unassigned	81_0	Clustered	5	VC_81_0	5	0.455	0.99999974	0.455	1	1	1	1.0
894	Microviridae~Bog5275_51	Unassigned	Microviridae	Unassigned	82_0	Clustered	8	VC_82_0	8	0.7282	1.0	0.7282	1	1	1	1.0
895	Microviridae~Bog9017_22	Unassigned	Microviridae	Unassigned	82_0	Clustered	8	VC_82_0	8	0.7282	1.0	0.7282	1	1	1	1.0
896	Microviridae~Fen2266_11	Unassigned	Microviridae	Unassigned	82_0	Clustered	8	VC_82_0	8	0.7282	1.0	0.7282	1	1	1	1.0
897	Microviridae~Fen418_41	Unassigned	Microviridae	Unassigned	82_0	Clustered	8	VC_82_0	8	0.7282	1.0	0.7282	1	1	1	1.0
898	Microviridae~Fen4707_41	Unassigned	Microviridae	Unassigned	82_0	Clustered	8	VC_82_0	8	0.7282	1.0	0.7282	1	1	1	1.0
899	Microviridae~Fen685_11	Unassigned	Microviridae	Unassigned	82_0	Clustered	8	VC_82_0	8	0.7282	1.0	0.7282	1	1	1	1.0
900	Microviridae~Fen7786_21	Unassigned	Microviridae	Unassigned	82_0	Clustered	8	VC_82_0	8	0.7282	1.0	0.7282	1	1	1	1.0
901	Microviridae~Fen7895_21	Unassigned	Microviridae	Unassigned	82_0	Clustered	8	VC_82_0	8	0.7282	1.0	0.7282	1	1	1	1.0
902	Microviridae~Fen7918_21	Unassigned	Microviridae	Unassigned	81_0	Clustered	5	VC_81_0	5	0.455	0.99999974	0.455	1	1	1	1.0
903	Morganella~phage~MmP1	Caudovirales	Podoviridae	Teseptimavirus	206_0	Clustered	60	VC_206_0	60	0.9832	1.0	0.9832	4	1	1	1.0
904	Morganella~phage~vB_MmoP_MP2	Caudovirales	Podoviridae	Teseptimavirus	206_0	Clustered	60	VC_206_0	60	0.9832	1.0	0.9832	4	1	1	1.0
905	Mycobacterium~phage~20ES	Caudovirales	Siphoviridae	Fromanvirus	274_2	Clustered	31	VC_274_2	31	0.5541	1.0	0.5541	2	1	1	0.871
906	Mycobacterium~phage~40AC	Caudovirales	Siphoviridae	Fromanvirus	274_2	Clustered	31	VC_274_2	31	0.5541	1.0	0.5541	2	1	1	0.871
907	Mycobacterium~phage~Abrogate	Caudovirales	Siphoviridae	Fromanvirus	303_0	Clustered	49	VC_303_0	49	0.998	1.0	0.998	2	1	1	1.0
908	Mycobacterium~phage~Adzzy	Caudovirales	Siphoviridae	Fromanvirus	274_2	Clustered	31	VC_274_2	31	0.5541	1.0	0.5541	2	1	1	0.871
909	Mycobacterium~phage~Aeneas	Caudovirales	Siphoviridae	Fromanvirus	303_0	Clustered	49	VC_303_0	49	0.998	1.0	0.998	2	1	1	1.0
910	Mycobacterium~phage~Alice	Caudovirales	Myoviridae	Bxz1virus	304_0	Clustered	21	VC_304_0	21	0.929	1.0	0.929	2	1	1	1.0
911	Mycobacterium~phage~Alsfro	Caudovirales	Siphoviridae	Fromanvirus	303_0	Clustered	49	VC_303_0	49	0.998	1.0	0.998	2	1	1	1.0
912	Mycobacterium~phage~Alvin	Caudovirales	Siphoviridae	Fromanvirus	303_0	Clustered	49	VC_303_0	49	0.998	1.0	0.998	2	1	1	1.0
913	Mycobacterium~phage~Angel	Caudovirales	Siphoviridae	Liefievirus	278_0	Clustered	9	VC_278_0	9	0.5375	1.0	0.5375	1	1	1	1.0
914	Mycobacterium~phage~AnnaL29	Caudovirales	Siphoviridae	Fromanvirus	274_2	Clustered	31	VC_274_2	31	0.5541	1.0	0.5541	2	1	1	0.871
915	Mycobacterium~phage~Anubis	Caudovirales	Siphoviridae	Fromanvirus	275_0	Clustered	9	VC_275_0	9	0.224	1.0	0.224	2	1	1	1.0
916	Mycobacterium~phage~Apizium	Caudovirales	Siphoviridae	Pg1virus	63_0	Clustered	21	VC_63_0	21	0.5593	1.0	0.5593	2	1	1	1.0
917	Mycobacterium~phage~ArcherNM	Caudovirales	Siphoviridae	Fromanvirus	274_2	Clustered	31	VC_274_2	31	0.5541	1.0	0.5541	2	1	1	0.871
918	Mycobacterium~phage~ArcherS7	Caudovirales	Myoviridae	Bxz1virus	304_0	Clustered	21	VC_304_0	21	0.929	1.0	0.929	2	1	1	1.0
919	Mycobacterium~phage~Archie	Caudovirales	Siphoviridae	Bronvirus	306_0	Clustered	9	VC_306_0	9	0.7957	1.0	0.7957	1	1	1	1.0
920	Mycobacterium~phage~Ariel	Caudovirales	Siphoviridae	Omegavirus	305_0	Clustered	3	VC_305_0	3	0.1142	0.99737279	0.1139	1	1	1	1.0
921	Mycobacterium~phage~Artemis2UCLA	Caudovirales	Siphoviridae	Fromanvirus	274_0	Clustered	5	VC_274_0	5	0.1075	0.99999997	0.1075	1	1	1	1.0
922	Mycobacterium~phage~Astraea	Caudovirales	Myoviridae	Bxz1virus	304_0	Clustered	21	VC_304_0	21	0.929	1.0	0.929	2	1	1	1.0
923	Mycobacterium~phage~BTCU-1	Caudovirales	Siphoviridae	Fromanvirus	275_0	Clustered	9	VC_275_0	9	0.224	1.0	0.224	2	1	1	1.0
924	Mycobacterium~phage~Bactobuster	Caudovirales	Siphoviridae	Fromanvirus	274_2	Clustered	31	VC_274_2	31	0.5541	1.0	0.5541	2	1	1	0.871
925	Mycobacterium~phage~Badfish	Caudovirales	Siphoviridae	Pg1virus	63_0	Clustered	21	VC_63_0	21	0.5593	1.0	0.5593	2	1	1	1.0
926	Mycobacterium~phage~Barnyard	Caudovirales	Siphoviridae	Barnyardvirus	271_0	Clustered	6	VC_271_0	6	0.6641	1.0	0.6641	2	1	1	1.0
927	Mycobacterium~phage~BarrelRoll	Caudovirales	Siphoviridae	Timquatrovirus	263_2	Clustered	13	VC_263_2	13	0.5339	1.0	0.5339	2	1	1	0.7949
928	Mycobacterium~phage~Barriga	Caudovirales	Siphoviridae	Fromanvirus	303_0	Clustered	49	VC_303_0	49	0.998	1.0	0.998	2	1	1	1.0
929	Mycobacterium~phage~BellusTerra	Caudovirales	Siphoviridae	Fromanvirus	275_1	Clustered	14	VC_275_1	14	0.3176	1.0	0.3176	2	1	1	0.9011
930	Mycobacterium~phage~Bernal13	Caudovirales	Siphoviridae	Bernal13virus	262_0	Clustered/Singleton	1	VC_262_0	1	0.0	1.0	0.0	1	1	1	1.0
931	Mycobacterium~phage~BigNuz	Caudovirales	Siphoviridae	Bignuzvirus	260_0	Clustered	8	VC_260_0	8	0.5018	1.0	0.5018	3	1	1	1.0
932	Mycobacterium~phage~Bipolar	Caudovirales	Siphoviridae	Cheoctovirus	269_0	Clustered	2	VC_269_0	2	0.0129	0.95442138	0.0123	2	1	1	1.0
933	Mycobacterium~phage~Blue7	Caudovirales	Siphoviridae	Fromanvirus	274_0	Clustered	5	VC_274_0	5	0.1075	0.99999997	0.1075	1	1	1	1.0
934	Mycobacterium~phage~Bobi	Caudovirales	Siphoviridae	Cheoctovirus	269_3	Clustered	5	VC_269_3	5	0.05	0.99998629	0.05	1	1	1	0.7
935	Mycobacterium~phage~Bongo	Caudovirales	Siphoviridae	Bongovirus	307_0	Clustered	3	VC_307_0	3	0.5356	0.99748796	0.5343	2	1	1	1.0
936	Mycobacterium~phage~Breeniome	Caudovirales	Myoviridae	Bxz1virus	304_0	Clustered	21	VC_304_0	21	0.929	1.0	0.929	2	1	1	1.0
937	Mycobacterium~phage~Brocalys	Caudovirales	Siphoviridae	Cheoctovirus	269_1	Clustered	34	VC_269_1	34	0.5335	1.0	0.5335	2	1	1	0.7914
938	Mycobacterium~phage~Bruin	Caudovirales	Siphoviridae	Kostyavirus	308_0	Clustered	25	VC_308_0	25	0.966	1.0	0.966	2	1	1	1.0
939	Mycobacterium~phage~Brusacoram	Caudovirales	Siphoviridae	Fishburnevirus	260_0	Clustered	8	VC_260_0	8	0.5018	1.0	0.5018	3	1	1	1.0
940	Mycobacterium~phage~Butters	Caudovirales	Siphoviridae	Buttersvirus	92_0	Clustered	10	VC_92_0	10	0.4618	1.0	0.4618	3	1	1	1.0
941	Mycobacterium~phage~BuzzLyseyear	Caudovirales	Siphoviridae	Cheoctovirus	269_2	Clustered	3	VC_269_2	3	0.0296	0.99850817	0.0295	2	1	1	1.0
942	Mycobacterium~phage~Bxz1	Caudovirales	Myoviridae	Bxz1virus	304_0	Clustered	21	VC_304_0	21	0.929	1.0	0.929	2	1	1	1.0
943	Mycobacterium~phage~CASbig	Caudovirales	Siphoviridae	Fromanvirus	303_0	Clustered	49	VC_303_0	49	0.998	1.0	0.998	2	1	1	1.0
944	Mycobacterium~phage~CRB1	Caudovirales	Siphoviridae	Fromanvirus	274_2	Clustered	31	VC_274_2	31	0.5541	1.0	0.5541	2	1	1	0.871
945	Mycobacterium~phage~Cabrinians	Caudovirales	Siphoviridae	Cheoctovirus	269_1	Clustered	34	VC_269_1	34	0.5335	1.0	0.5335	2	1	1	0.7914
946	Mycobacterium~phage~Cali	Caudovirales	Myoviridae	Bxz1virus	304_0	Clustered	21	VC_304_0	21	0.929	1.0	0.929	2	1	1	1.0
947	Mycobacterium~phage~Cambiare	Caudovirales	Siphoviridae	Liefievirus	278_0	Clustered	9	VC_278_0	9	0.5375	1.0	0.5375	1	1	1	1.0
948	Mycobacterium~phage~CaptainTrips	Caudovirales	Siphoviridae	Cheoctovirus	269_1	Clustered	34	VC_269_1	34	0.5335	1.0	0.5335	2	1	1	0.7914
949	Mycobacterium~phage~Carcharodon	Caudovirales	Siphoviridae	Charlievirus	92_0	Clustered	10	VC_92_0	10	0.4618	1.0	0.4618	3	1	1	1.0
950	Mycobacterium~phage~Catalina	Caudovirales	Siphoviridae	Fromanvirus	274_1	Clustered	3	VC_274_1	3	0.0529	0.99851447	0.0528	2	1	1	1.0
951	Mycobacterium~phage~Catdawg	Caudovirales	Siphoviridae	Corndogvirus	309_0	Clustered	4	VC_309_0	4	0.5564	0.99998589	0.5564	1	1	1	1.0
952	Mycobacterium~phage~Catera	Caudovirales	Myoviridae	Bxz1virus	304_0	Clustered	21	VC_304_0	21	0.929	1.0	0.929	2	1	1	1.0
953	Mycobacterium~phage~Cerasum	Caudovirales	Siphoviridae	Cheoctovirus	269_5	Clustered	2	VC_269_5	2	0.0226	0.95644656	0.0216	1	1	1	1.0
954	Mycobacterium~phage~Charlie	Caudovirales	Siphoviridae	Charlievirus	92_0	Clustered	10	VC_92_0	10	0.4618	1.0	0.4618	3	1	1	1.0
955	Mycobacterium~phage~Cheetobro	Caudovirales	Siphoviridae	Timquatrovirus	263_0	Clustered	2	VC_263_0	2	0.0753	0.95469116	0.0719	2	1	1	1.0
956	Mycobacterium~phage~Chy4	Caudovirales	Siphoviridae	Fromanvirus	274_2	Clustered	31	VC_274_2	31	0.5541	1.0	0.5541	2	1	1	0.871
957	Mycobacterium~phage~Chy5	Caudovirales	Siphoviridae	Fromanvirus	274_2	Clustered	31	VC_274_2	31	0.5541	1.0	0.5541	2	1	1	0.871
958	Mycobacterium~phage~CloudWang3	Caudovirales	Siphoviridae	Fromanvirus	274_0	Clustered	5	VC_274_0	5	0.1075	0.99999997	0.1075	1	1	1	1.0
959	Mycobacterium~phage~Colbert	Caudovirales	Siphoviridae	Pg1virus	63_0	Clustered	21	VC_63_0	21	0.5593	1.0	0.5593	2	1	1	1.0
960	Mycobacterium~phage~Contagion	Caudovirales	Siphoviridae	Kostyavirus	308_0	Clustered	25	VC_308_0	25	0.966	1.0	0.966	2	1	1	1.0
961	Mycobacterium~phage~Crossroads	Caudovirales	Siphoviridae	Bronvirus	306_0	Clustered	9	VC_306_0	9	0.7957	1.0	0.7957	1	1	1	1.0
962	Mycobacterium~phage~DD5	Caudovirales	Siphoviridae	Fromanvirus	303_0	Clustered	49	VC_303_0	49	0.998	1.0	0.998	2	1	1	1.0
963	Mycobacterium~phage~Daenerys	Caudovirales	Siphoviridae	Cheoctovirus	269_1	Clustered	34	VC_269_1	34	0.5335	1.0	0.5335	2	1	1	0.7914
964	Mycobacterium~phage~Damien	Caudovirales	Siphoviridae	Barnyardvirus	271_0	Clustered	6	VC_271_0	6	0.6641	1.0	0.6641	2	1	1	1.0
965	Mycobacterium~phage~Dandelion	Caudovirales	Myoviridae	Bxz1virus	304_0	Clustered	21	VC_304_0	21	0.929	1.0	0.929	2	1	1	1.0
966	Mycobacterium~phage~Dante	Caudovirales	Siphoviridae	Cheoctovirus	269_1	Clustered	34	VC_269_1	34	0.5335	1.0	0.5335	2	1	1	0.7914
967	Mycobacterium~phage~Donovan	Caudovirales	Siphoviridae	Fishburnevirus	260_0	Clustered	8	VC_260_0	8	0.5018	1.0	0.5018	3	1	1	1.0
968	Mycobacterium~phage~DrDrey	Caudovirales	Siphoviridae	Kostyavirus	308_0	Clustered	25	VC_308_0	25	0.966	1.0	0.966	2	1	1	1.0
969	Mycobacterium~phage~Dreamboat	Caudovirales	Siphoviridae	Fromanvirus	303_0	Clustered	49	VC_303_0	49	0.998	1.0	0.998	2	1	1	1.0
970	Mycobacterium~phage~Dumbo	Caudovirales	Siphoviridae	Kostyavirus	308_0	Clustered	25	VC_308_0	25	0.966	1.0	0.966	2	1	1	1.0
971	Mycobacterium~phage~Dusk	Caudovirales	Siphoviridae	Kostyavirus	308_0	Clustered	25	VC_308_0	25	0.966	1.0	0.966	2	1	1	1.0
972	Mycobacterium~phage~Dylan	Caudovirales	Siphoviridae	Corndogvirus	309_0	Clustered	4	VC_309_0	4	0.5564	0.99998589	0.5564	1	1	1	1.0
973	Mycobacterium~phage~ET08	Caudovirales	Myoviridae	Bxz1virus	304_0	Clustered	21	VC_304_0	21	0.929	1.0	0.929	2	1	1	1.0
974	Mycobacterium~phage~EagleEye	Caudovirales	Siphoviridae	Fromanvirus	274_2	Clustered	31	VC_274_2	31	0.5541	1.0	0.5541	2	1	1	0.871
975	Mycobacterium~phage~Echild	Caudovirales	Siphoviridae	Fromanvirus	274_2	Clustered	31	VC_274_2	31	0.5541	1.0	0.5541	2	1	1	0.871
976	Mycobacterium~phage~Edtherson	Caudovirales	Siphoviridae	Fromanvirus	303_0	Clustered	49	VC_303_0	49	0.998	1.0	0.998	2	1	1	1.0
977	Mycobacterium~phage~Enkosi	Caudovirales	Siphoviridae	Timquatrovirus	263_2	Clustered	13	VC_263_2	13	0.5339	1.0	0.5339	2	1	1	0.7949
978	Mycobacterium~phage~Equemioh13	Caudovirales	Siphoviridae	Fromanvirus	274_2	Clustered	31	VC_274_2	31	0.5541	1.0	0.5541	2	1	1	0.871
979	Mycobacterium~phage~Eremos	Caudovirales	Siphoviridae	Pg1virus	63_0	Clustered	21	VC_63_0	21	0.5593	1.0	0.5593	2	1	1	1.0
980	Mycobacterium~phage~Estave1	Caudovirales	Siphoviridae	Cheoctovirus	269_4	Clustered/Singleton	1	VC_269_4	1	0.0	1.0	0.0	1	1	1	1.0
981	Mycobacterium~phage~EvilGenius	Caudovirales	Siphoviridae	Fromanvirus	274_2	Clustered	31	VC_274_2	31	0.5541	1.0	0.5541	2	1	1	0.871
982	Mycobacterium~phage~First	Caudovirales	Siphoviridae	Fromanvirus	274_2	Clustered	31	VC_274_2	31	0.5541	1.0	0.5541	2	1	1	0.871
983	Mycobacterium~phage~Fishburne	Caudovirales	Siphoviridae	Fishburnevirus	260_0	Clustered	8	VC_260_0	8	0.5018	1.0	0.5018	3	1	1	1.0
984	Mycobacterium~phage~FlagStaff	Caudovirales	Siphoviridae	Liefievirus	278_0	Clustered	9	VC_278_0	9	0.5375	1.0	0.5375	1	1	1	1.0
985	Mycobacterium~phage~Florinda	Caudovirales	Siphoviridae	Cheoctovirus	269_3	Clustered	5	VC_269_3	5	0.05	0.99998629	0.05	1	1	1	0.7
986	Mycobacterium~phage~Gardann	Caudovirales	Siphoviridae	Bronvirus	306_0	Clustered	9	VC_306_0	9	0.7957	1.0	0.7957	1	1	1	1.0
987	Mycobacterium~phage~Gengar	Caudovirales	Siphoviridae	Timquatrovirus	263_1	Clustered	5	VC_263_1	5	0.2279	0.99999994	0.2279	2	1	1	1.0
988	Mycobacterium~phage~Gizmo	Caudovirales	Myoviridae	Bxz1virus	304_0	Clustered	21	VC_304_0	21	0.929	1.0	0.929	2	1	1	1.0
989	Mycobacterium~phage~Goku	Caudovirales	Siphoviridae	Kostyavirus	308_0	Clustered	25	VC_308_0	25	0.966	1.0	0.966	2	1	1	1.0
990	Mycobacterium~phage~Gompeii16	Caudovirales	Siphoviridae	Fromanvirus	303_0	Clustered	49	VC_303_0	49	0.998	1.0	0.998	2	1	1	1.0
991	Mycobacterium~phage~Graduation	Caudovirales	Siphoviridae	Fromanvirus	303_0	Clustered	49	VC_303_0	49	0.998	1.0	0.998	2	1	1	1.0
992	Mycobacterium~phage~Gumball	Caudovirales	Siphoviridae	Pbi1virus	270_0	Clustered	5	VC_270_0	5	0.6286	0.99999972	0.6286	3	1	1	1.0
993	Mycobacterium~phage~HINdeR	Caudovirales	Siphoviridae	Fromanvirus	275_1	Clustered	14	VC_275_1	14	0.3176	1.0	0.3176	2	1	1	0.9011
994	Mycobacterium~phage~Hades	Caudovirales	Siphoviridae	Cheoctovirus	269_1	Clustered	34	VC_269_1	34	0.5335	1.0	0.5335	2	1	1	0.7914
995	Mycobacterium~phage~Hamulus	Caudovirales	Siphoviridae	Cheoctovirus	269_1	Clustered	34	VC_269_1	34	0.5335	1.0	0.5335	2	1	1	0.7914
996	Mycobacterium~phage~HanShotFirst	Caudovirales	Siphoviridae	Fromanvirus	303_0	Clustered	49	VC_303_0	49	0.998	1.0	0.998	2	1	1	1.0
997	Mycobacterium~phage~Hawkeye	Caudovirales	Siphoviridae	Hawkeyevirus	270_0	Clustered	5	VC_270_0	5	0.6286	0.99999972	0.6286	3	1	1	1.0
998	Mycobacterium~phage~HufflyPuff	Caudovirales	Siphoviridae	Kostyavirus	308_0	Clustered	25	VC_308_0	25	0.966	1.0	0.966	2	1	1	1.0
999	Mycobacterium~phage~HyRo	Caudovirales	Myoviridae	Bxz1virus	304_0	Clustered	21	VC_304_0	21	0.929	1.0	0.929	2	1	1	1.0
1000	Mycobacterium~phage~Inventum	Caudovirales	Siphoviridae	Cheoctovirus	269_1	Clustered	34	VC_269_1	34	0.5335	1.0	0.5335	2	1	1	0.7914
1001	Mycobacterium~phage~Iracema64	Caudovirales	Siphoviridae	Fromanvirus	275_1	Clustered	14	VC_275_1	14	0.3176	1.0	0.3176	2	1	1	0.9011
1002	Mycobacterium~phage~Jabbawokkie	Caudovirales	Siphoviridae	Cheoctovirus	279_0	Clustered	4	VC_279_0	4	0.0865	0.99998524	0.0865	2	1	1	1.0
1003	Mycobacterium~phage~JacAttac	Caudovirales	Siphoviridae	Pg1virus	63_0	Clustered	21	VC_63_0	21	0.5593	1.0	0.5593	2	1	1	1.0
1004	Mycobacterium~phage~Jebeks	Caudovirales	Siphoviridae	Fishburnevirus	260_0	Clustered	8	VC_260_0	8	0.5018	1.0	0.5018	3	1	1	1.0
1005	Mycobacterium~phage~Job42	Caudovirales	Siphoviridae	Cheoctovirus	269_2	Clustered	3	VC_269_2	3	0.0296	0.99850817	0.0295	2	1	1	1.0
1006	Mycobacterium~phage~Jobu08	Caudovirales	Siphoviridae	Fromanvirus	275_0	Clustered	9	VC_275_0	9	0.224	1.0	0.224	2	1	1	1.0
1007	Mycobacterium~phage~Jolie2	Caudovirales	Siphoviridae	Liefievirus	278_0	Clustered	9	VC_278_0	9	0.5375	1.0	0.5375	1	1	1	1.0
1008	Mycobacterium~phage~Kampy	Caudovirales	Siphoviridae	Fromanvirus	275_1	Clustered	14	VC_275_1	14	0.3176	1.0	0.3176	2	1	1	0.9011
1009	Mycobacterium~phage~Keshu	Caudovirales	Siphoviridae	Timquatrovirus	263_2	Clustered	13	VC_263_2	13	0.5339	1.0	0.5339	2	1	1	0.7949
1010	Mycobacterium~phage~Kikipoo	Caudovirales	Siphoviridae	Pg1virus	63_0	Clustered	21	VC_63_0	21	0.5593	1.0	0.5593	2	1	1	1.0
1011	Mycobacterium~phage~Kimberlium	Caudovirales	Siphoviridae	Cheoctovirus	269_3	Clustered	5	VC_269_3	5	0.05	0.99998629	0.05	1	1	1	0.7
1012	Mycobacterium~phage~Konstantine	Caudovirales	Siphoviridae	Barnyardvirus	271_0	Clustered	6	VC_271_0	6	0.6641	1.0	0.6641	2	1	1	1.0
1013	Mycobacterium~phage~Kratio	Caudovirales	Siphoviridae	Timquatrovirus	263_1	Clustered	5	VC_263_1	5	0.2279	0.99999994	0.2279	2	1	1	1.0
1014	Mycobacterium~phage~LadyBird	Caudovirales	Siphoviridae	Fromanvirus	274_2	Clustered	31	VC_274_2	31	0.5541	1.0	0.5541	2	1	1	0.871
1015	Mycobacterium~phage~Lamina13	Caudovirales	Siphoviridae	Fromanvirus	303_0	Clustered	49	VC_303_0	49	0.998	1.0	0.998	2	1	1	1.0
1016	Mycobacterium~phage~Larenn	Caudovirales	Siphoviridae	Fromanvirus	274_2	Clustered	31	VC_274_2	31	0.5541	1.0	0.5541	2	1	1	0.871
1017	Mycobacterium~phage~Leo	Caudovirales	Siphoviridae	Liefievirus	278_0	Clustered	9	VC_278_0	9	0.5375	1.0	0.5375	1	1	1	1.0
1018	Mycobacterium~phage~Lilac	Caudovirales	Siphoviridae	Kostyavirus	308_0	Clustered	25	VC_308_0	25	0.966	1.0	0.966	2	1	1	1.0
1019	Mycobacterium~phage~LinStu	Caudovirales	Myoviridae	Bxz1virus	304_0	Clustered	21	VC_304_0	21	0.929	1.0	0.929	2	1	1	1.0
1020	Mycobacterium~phage~Llama	Caudovirales	Siphoviridae	Cheoctovirus	269_1	Clustered	34	VC_269_1	34	0.5335	1.0	0.5335	2	1	1	0.7914
1021	Mycobacterium~phage~Lolly9	Caudovirales	Siphoviridae	Bronvirus	306_0	Clustered	9	VC_306_0	9	0.7957	1.0	0.7957	1	1	1	1.0
1022	Mycobacterium~phage~Loser	Caudovirales	Siphoviridae	Fromanvirus	274_2	Clustered	31	VC_274_2	31	0.5541	1.0	0.5541	2	1	1	0.871
1023	Mycobacterium~phage~Luchador	Caudovirales	Siphoviridae	Fromanvirus	274_2	Clustered	31	VC_274_2	31	0.5541	1.0	0.5541	2	1	1	0.871
1024	Mycobacterium~phage~Lukilu	Caudovirales	Myoviridae	Bixzunavirus	304_0	Clustered	21	VC_304_0	21	0.929	1.0	0.929	2	1	1	1.0
1025	Mycobacterium~phage~MOOREtheMARYer	Caudovirales	Siphoviridae	Liefievirus	278_0	Clustered	9	VC_278_0	9	0.5375	1.0	0.5375	1	1	1	1.0
1026	Mycobacterium~phage~Makemake	Caudovirales	Siphoviridae	Fromanvirus	303_0	Clustered	49	VC_303_0	49	0.998	1.0	0.998	2	1	1	1.0
1027	Mycobacterium~phage~Malithi	Caudovirales	Siphoviridae	Fishburnevirus	260_0	Clustered	8	VC_260_0	8	0.5018	1.0	0.5018	3	1	1	1.0
1028	Mycobacterium~phage~Manad	Caudovirales	Siphoviridae	Pg1virus	63_0	Clustered	21	VC_63_0	21	0.5593	1.0	0.5593	2	1	1	1.0
1029	Mycobacterium~phage~MarQuardt	Caudovirales	Siphoviridae	Fromanvirus	275_0	Clustered	9	VC_275_0	9	0.224	1.0	0.224	2	1	1	1.0
1030	Mycobacterium~phage~Marvin	Caudovirales	Siphoviridae	Marvinvirus	310_0	Clustered	2	VC_310_0	2	0.8895	0.93254314	0.8295	1	1	1	1.0
1031	Mycobacterium~phage~MiaZeal	Caudovirales	Siphoviridae	Omegavirus	305_0	Clustered	3	VC_305_0	3	0.1142	0.99737279	0.1139	1	1	1	1.0
1032	Mycobacterium~phage~MichelleMyBell	Caudovirales	Siphoviridae	Buttersvirus	92_0	Clustered	10	VC_92_0	10	0.4618	1.0	0.4618	3	1	1	1.0
1033	Mycobacterium~phage~Milly	Caudovirales	Siphoviridae	Timquatrovirus	263_2	Clustered	13	VC_263_2	13	0.5339	1.0	0.5339	2	1	1	0.7949
1034	Mycobacterium~phage~Mindy	Caudovirales	Siphoviridae	Kostyavirus	308_0	Clustered	25	VC_308_0	25	0.966	1.0	0.966	2	1	1	1.0
1035	Mycobacterium~phage~Minerva	Caudovirales	Siphoviridae	Omegavirus	305_1	Clustered	3	VC_305_1	3	0.1128	0.9970292	0.1124	1	1	1	1.0
1036	Mycobacterium~phage~MoMoMixon	Caudovirales	Myoviridae	Bxz1virus	304_0	Clustered	21	VC_304_0	21	0.929	1.0	0.929	2	1	1	1.0
1037	Mycobacterium~phage~MosMoris	Caudovirales	Siphoviridae	Marvinvirus	310_0	Clustered	2	VC_310_0	2	0.8895	0.93254314	0.8295	1	1	1	1.0
1038	Mycobacterium~phage~Muddy	Caudovirales	Siphoviridae	Ff47virus	264_0	Clustered	2	VC_264_0	2	0.2378	0.95402977	0.2268	1	1	1	1.0
1039	Mycobacterium~phage~Mufasa	Caudovirales	Siphoviridae	Timquatrovirus	263_2	Clustered	13	VC_263_2	13	0.5339	1.0	0.5339	2	1	1	0.7949
1040	Mycobacterium~phage~Mulciber	Caudovirales	Siphoviridae	Fromanvirus	274_2	Clustered	31	VC_274_2	31	0.5541	1.0	0.5541	2	1	1	0.871
1041	Mycobacterium~phage~Murphy	Caudovirales	Siphoviridae	Kostyavirus	308_0	Clustered	25	VC_308_0	25	0.966	1.0	0.966	2	1	1	1.0
1042	Mycobacterium~phage~Murucutumbu	Caudovirales	Siphoviridae	Timquatrovirus	263_2	Clustered	13	VC_263_2	13	0.5339	1.0	0.5339	2	1	1	0.7949
1043	Mycobacterium~phage~Nala	Caudovirales	Siphoviridae	Kostyavirus	308_0	Clustered	25	VC_308_0	25	0.966	1.0	0.966	2	1	1	1.0
1044	Mycobacterium~phage~Nappy	Caudovirales	Myoviridae	Bxz1virus	304_0	Clustered	21	VC_304_0	21	0.929	1.0	0.929	2	1	1	1.0
1045	Mycobacterium~phage~NelitzaMV	Caudovirales	Siphoviridae	Kostyavirus	308_0	Clustered	25	VC_308_0	25	0.966	1.0	0.966	2	1	1	1.0
1046	Mycobacterium~phage~Nerujay	Caudovirales	Siphoviridae	Fromanvirus	303_0	Clustered	49	VC_303_0	49	0.998	1.0	0.998	2	1	1	1.0
1047	Mycobacterium~phage~Newman	Caudovirales	Siphoviridae	Pg1virus	63_0	Clustered	21	VC_63_0	21	0.5593	1.0	0.5593	2	1	1	1.0
1048	Mycobacterium~phage~Nhonho	Caudovirales	Siphoviridae	Fromanvirus	303_0	Clustered	49	VC_303_0	49	0.998	1.0	0.998	2	1	1	1.0
1049	Mycobacterium~phage~Nyxis	Caudovirales	Siphoviridae	Fromanvirus	275_1	Clustered	14	VC_275_1	14	0.3176	1.0	0.3176	2	1	1	0.9011
1050	Mycobacterium~phage~OSmaximus	Caudovirales	Siphoviridae	Pg1virus	63_0	Clustered	21	VC_63_0	21	0.5593	1.0	0.5593	2	1	1	1.0
1051	Mycobacterium~phage~Oaker	Caudovirales	Siphoviridae	Barnyardvirus	271_0	Clustered	6	VC_271_0	6	0.6641	1.0	0.6641	2	1	1	1.0
1052	Mycobacterium~phage~Obama12	Caudovirales	Siphoviridae	L5virus	275_1	Clustered	14	VC_275_1	14	0.3176	1.0	0.3176	2	1	1	0.9011
1053	Mycobacterium~phage~OkiRoe	Caudovirales	Siphoviridae	Timquatrovirus	263_1	Clustered	5	VC_263_1	5	0.2279	0.99999994	0.2279	2	1	1	1.0
1054	Mycobacterium~phage~Oline	Caudovirales	Siphoviridae	Pg1virus	63_0	Clustered	21	VC_63_0	21	0.5593	1.0	0.5593	2	1	1	1.0
1055	Mycobacterium~phage~Omnicron	Caudovirales	Siphoviridae	Timquatrovirus	263_1	Clustered	5	VC_263_1	5	0.2279	0.99999994	0.2279	2	1	1	1.0
1056	Mycobacterium~phage~Orion	Caudovirales	Siphoviridae	Pg1virus	63_0	Clustered	21	VC_63_0	21	0.5593	1.0	0.5593	2	1	1	1.0
1057	Mycobacterium~phage~Ovechkin	Caudovirales	Siphoviridae	Cheoctovirus	269_1	Clustered	34	VC_269_1	34	0.5335	1.0	0.5335	2	1	1	0.7914
1058	Mycobacterium~phage~PBI1	Caudovirales	Siphoviridae	Pbi1virus	270_0	Clustered	5	VC_270_0	5	0.6286	0.99999972	0.6286	3	1	1	1.0
1059	Mycobacterium~phage~PG1	Caudovirales	Siphoviridae	Pg1virus	63_0	Clustered	21	VC_63_0	21	0.5593	1.0	0.5593	2	1	1	1.0
1060	Mycobacterium~phage~PLot	Caudovirales	Siphoviridae	Plotvirus	270_0	Clustered	5	VC_270_0	5	0.6286	0.99999972	0.6286	3	1	1	1.0
1061	Mycobacterium~phage~Panchino	Caudovirales	Siphoviridae	Redivirus	92_0	Clustered	10	VC_92_0	10	0.4618	1.0	0.4618	3	1	1	1.0
1062	Mycobacterium~phage~Papez	Caudovirales	Siphoviridae	Fromanvirus	303_0	Clustered	49	VC_303_0	49	0.998	1.0	0.998	2	1	1	1.0
1063	Mycobacterium~phage~Papyrus	Caudovirales	Siphoviridae	Send513virus	272_0	Clustered	2	VC_272_0	2	0.2826	0.94755975	0.2677	1	1	1	1.0
1064	Mycobacterium~phage~Pari	Caudovirales	Siphoviridae	Fromanvirus	303_0	Clustered	49	VC_303_0	49	0.998	1.0	0.998	2	1	1	1.0
1065	Mycobacterium~phage~Patience	Caudovirales	Siphoviridae	Patiencevirus	271_0	Clustered	6	VC_271_0	6	0.6641	1.0	0.6641	2	1	1	1.0
1066	Mycobacterium~phage~PattyP	Caudovirales	Siphoviridae	Fromanvirus	303_0	Clustered	49	VC_303_0	49	0.998	1.0	0.998	2	1	1	1.0
1067	Mycobacterium~phage~PegLeg	Caudovirales	Siphoviridae	Bongovirus	307_0	Clustered	3	VC_307_0	3	0.5356	0.99748796	0.5343	2	1	1	1.0
1068	Mycobacterium~phage~Pepe	Caudovirales	Siphoviridae	Fromanvirus	303_0	Clustered	49	VC_303_0	49	0.998	1.0	0.998	2	1	1	1.0
1069	Mycobacterium~phage~Phantastic	Caudovirales	Siphoviridae	Fromanvirus	275_0	Clustered	9	VC_275_0	9	0.224	1.0	0.224	2	1	1	1.0
1070	Mycobacterium~phage~PhatBacter	Caudovirales	Siphoviridae	Kostyavirus	308_0	Clustered	25	VC_308_0	25	0.966	1.0	0.966	2	1	1	1.0
1071	Mycobacterium~phage~Phatniss	Caudovirales	Siphoviridae	Cheoctovirus	269_1	Clustered	34	VC_269_1	34	0.5335	1.0	0.5335	2	1	1	0.7914
1072	Mycobacterium~phage~Phaux	Caudovirales	Siphoviridae	Kostyavirus	308_0	Clustered	25	VC_308_0	25	0.966	1.0	0.966	2	1	1	1.0
1073	Mycobacterium~phage~Phayonce	Caudovirales	Siphoviridae	Phayoncevirus	260_0	Clustered	8	VC_260_0	8	0.5018	1.0	0.5018	3	1	1	1.0
1074	Mycobacterium~phage~Phipps	Caudovirales	Siphoviridae	Pg1virus	63_0	Clustered	21	VC_63_0	21	0.5593	1.0	0.5593	2	1	1	1.0
1075	Mycobacterium~phage~Phlei	Caudovirales	Siphoviridae	Fromanvirus	274_2	Clustered	31	VC_274_2	31	0.5541	1.0	0.5541	2	1	1	0.871
1076	Mycobacterium~phage~Phrann	Caudovirales	Siphoviridae	Redivirus	92_0	Clustered	10	VC_92_0	10	0.4618	1.0	0.4618	3	1	1	1.0
1077	Mycobacterium~phage~PhrostyMug	Caudovirales	Siphoviridae	Fromanvirus	303_0	Clustered	49	VC_303_0	49	0.998	1.0	0.998	2	1	1	1.0
1078	Mycobacterium~phage~Phrux	Caudovirales	Siphoviridae	Kostyavirus	308_0	Clustered	25	VC_308_0	25	0.966	1.0	0.966	2	1	1	1.0
1079	Mycobacterium~phage~Pinto	Caudovirales	Siphoviridae	Fromanvirus	303_0	Clustered	49	VC_303_0	49	0.998	1.0	0.998	2	1	1	1.0
1080	Mycobacterium~phage~Pioneer	Caudovirales	Siphoviridae	Fromanvirus	274_1	Clustered	3	VC_274_1	3	0.0529	0.99851447	0.0528	2	1	1	1.0
1081	Mycobacterium~phage~Pipsqueaks	Caudovirales	Siphoviridae	Charlievirus	92_0	Clustered	10	VC_92_0	10	0.4618	1.0	0.4618	3	1	1	1.0
1082	Mycobacterium~phage~Piro94	Caudovirales	Siphoviridae	Fromanvirus	274_2	Clustered	31	VC_274_2	31	0.5541	1.0	0.5541	2	1	1	0.871
1083	Mycobacterium~phage~Pleione	Caudovirales	Myoviridae	Bxz1virus	304_0	Clustered	21	VC_304_0	21	0.929	1.0	0.929	2	1	1	1.0
1084	Mycobacterium~phage~PopTart	Caudovirales	Siphoviridae	Cheoctovirus	269_1	Clustered	34	VC_269_1	34	0.5335	1.0	0.5335	2	1	1	0.7914
1085	Mycobacterium~phage~Pops	Caudovirales	Siphoviridae	Pg1virus	63_0	Clustered	21	VC_63_0	21	0.5593	1.0	0.5593	2	1	1	1.0
1086	Mycobacterium~phage~Predator	Caudovirales	Siphoviridae	Barnyardvirus	271_0	Clustered	6	VC_271_0	6	0.6641	1.0	0.6641	2	1	1	1.0
1087	Mycobacterium~phage~Quico	Caudovirales	Siphoviridae	Cheoctovirus	269_3	Clustered	5	VC_269_3	5	0.05	0.99998629	0.05	1	1	1	0.7
1088	Mycobacterium~phage~Quink	Caudovirales	Siphoviridae	Kostyavirus	308_0	Clustered	25	VC_308_0	25	0.966	1.0	0.966	2	1	1	1.0
1089	Mycobacterium~phage~RedRock	Caudovirales	Siphoviridae	L5virus	274_2	Clustered	31	VC_274_2	31	0.5541	1.0	0.5541	2	1	1	0.871
1090	Mycobacterium~phage~Redi	Caudovirales	Siphoviridae	Redivirus	92_0	Clustered	10	VC_92_0	10	0.4618	1.0	0.4618	3	1	1	1.0
1091	Mycobacterium~phage~Redno2	Caudovirales	Siphoviridae	Omegavirus	305_2	Clustered/Singleton	1	VC_305_2	1	0.0	1.0	0.0	1	1	1	1.0
1092	Mycobacterium~phage~Rey	Caudovirales	Siphoviridae	Reyvirus	307_0	Clustered	3	VC_307_0	3	0.5356	0.99748796	0.5343	2	1	1	1.0
1093	Mycobacterium~phage~RhynO	Caudovirales	Siphoviridae	Fromanvirus	275_1	Clustered	14	VC_275_1	14	0.3176	1.0	0.3176	2	1	1	0.9011
1094	Mycobacterium~phage~RidgeCB	Caudovirales	Siphoviridae	L5virus	303_0	Clustered	49	VC_303_0	49	0.998	1.0	0.998	2	1	1	1.0
1095	Mycobacterium~phage~Rizal	Caudovirales	Myoviridae	Bxz1virus	304_0	Clustered	21	VC_304_0	21	0.929	1.0	0.929	2	1	1	1.0
1096	Mycobacterium~phage~Rockstar	Caudovirales	Siphoviridae	L5virus	275_0	Clustered	9	VC_275_0	9	0.224	1.0	0.224	2	1	1	1.0
1097	Mycobacterium~phage~Rufus	Caudovirales	Siphoviridae	Fromanvirus	303_0	Clustered	49	VC_303_0	49	0.998	1.0	0.998	2	1	1	1.0
1098	Mycobacterium~phage~SWU1	Caudovirales	Siphoviridae	L5virus	274_2	Clustered	31	VC_274_2	31	0.5541	1.0	0.5541	2	1	1	0.871
1099	Mycobacterium~phage~Saal	Caudovirales	Siphoviridae	Cheoctovirus	269_1	Clustered	34	VC_269_1	34	0.5335	1.0	0.5335	2	1	1	0.7914
1100	Mycobacterium~phage~SarFire	Caudovirales	Siphoviridae	Fromanvirus	303_0	Clustered	49	VC_303_0	49	0.998	1.0	0.998	2	1	1	1.0
1101	Mycobacterium~phage~ScottMcG	Caudovirales	Myoviridae	Bxz1virus	304_0	Clustered	21	VC_304_0	21	0.929	1.0	0.929	2	1	1	1.0
1102	Mycobacterium~phage~Seabiscuit	Caudovirales	Siphoviridae	Fromanvirus	303_0	Clustered	49	VC_303_0	49	0.998	1.0	0.998	2	1	1	1.0
1103	Mycobacterium~phage~Seagreen	Caudovirales	Siphoviridae	Cheoctovirus	269_3	Clustered	5	VC_269_3	5	0.05	0.99998629	0.05	1	1	1	0.7
1104	Mycobacterium~phage~Sebata	Caudovirales	Myoviridae	Bxz1virus	304_0	Clustered	21	VC_304_0	21	0.929	1.0	0.929	2	1	1	1.0
1105	Mycobacterium~phage~Send513	Caudovirales	Siphoviridae	Send513virus	272_0	Clustered	2	VC_272_0	2	0.2826	0.94755975	0.2677	1	1	1	1.0
1106	Mycobacterium~phage~Serenity	Caudovirales	Siphoviridae	Fromanvirus	274_2	Clustered	31	VC_274_2	31	0.5541	1.0	0.5541	2	1	1	0.871
1107	Mycobacterium~phage~Severus	Caudovirales	Siphoviridae	Fromanvirus	275_1	Clustered	14	VC_275_1	14	0.3176	1.0	0.3176	2	1	1	0.9011
1108	Mycobacterium~phage~Shauna1	Caudovirales	Siphoviridae	Che8virus	269_0	Clustered	2	VC_269_0	2	0.0129	0.95442138	0.0123	2	1	1	1.0
1109	Mycobacterium~phage~ShedlockHolmes	Caudovirales	Siphoviridae	Timquatrovirus	263_2	Clustered	13	VC_263_2	13	0.5339	1.0	0.5339	2	1	1	0.7949
1110	Mycobacterium~phage~Sheen	Caudovirales	Siphoviridae	Fromanvirus	275_1	Clustered	14	VC_275_1	14	0.3176	1.0	0.3176	2	1	1	0.9011
1111	Mycobacterium~phage~ShiLan	Caudovirales	Siphoviridae	Che8virus	269_1	Clustered	34	VC_269_1	34	0.5335	1.0	0.5335	2	1	1	0.7914
1112	Mycobacterium~phage~ShiVal	Caudovirales	Siphoviridae	Pg1virus	63_0	Clustered	21	VC_63_0	21	0.5593	1.0	0.5593	2	1	1	1.0
1113	Mycobacterium~phage~Shipwreck	Caudovirales	Siphoviridae	Fishburnevirus	260_0	Clustered	8	VC_260_0	8	0.5018	1.0	0.5018	3	1	1	1.0
1114	Mycobacterium~phage~SiSi	Caudovirales	Siphoviridae	Cheoctovirus	269_1	Clustered	34	VC_269_1	34	0.5335	1.0	0.5335	2	1	1	0.7914
1115	Mycobacterium~phage~SirDuracell	Caudovirales	Siphoviridae	Cjw1virus	308_0	Clustered	25	VC_308_0	25	0.966	1.0	0.966	2	1	1	1.0
1116	Mycobacterium~phage~SkiPole	Caudovirales	Siphoviridae	L5virus	303_0	Clustered	49	VC_303_0	49	0.998	1.0	0.998	2	1	1	1.0
1117	Mycobacterium~phage~SkinnyPete	Caudovirales	Siphoviridae	Redivirus	92_0	Clustered	10	VC_92_0	10	0.4618	1.0	0.4618	3	1	1	1.0
1118	Mycobacterium~phage~Sneeze	Caudovirales	Siphoviridae	Liefievirus	278_0	Clustered	9	VC_278_0	9	0.5375	1.0	0.5375	1	1	1	1.0
1119	Mycobacterium~phage~Snenia	Caudovirales	Siphoviridae	Bronvirus	306_0	Clustered	9	VC_306_0	9	0.7957	1.0	0.7957	1	1	1	1.0
1120	Mycobacterium~phage~Solon	Caudovirales	Siphoviridae	L5virus	303_0	Clustered	49	VC_303_0	49	0.998	1.0	0.998	2	1	1	1.0
1121	Mycobacterium~phage~Soto	Caudovirales	Siphoviridae	Pg1virus	63_0	Clustered	21	VC_63_0	21	0.5593	1.0	0.5593	2	1	1	1.0
1122	Mycobacterium~phage~Sparkdehlily	Caudovirales	Siphoviridae	Cheoctovirus	269_1	Clustered	34	VC_269_1	34	0.5335	1.0	0.5335	2	1	1	0.7914
1123	Mycobacterium~phage~Sparky	Caudovirales	Siphoviridae	Unassigned	262_1	Clustered/Singleton	1	VC_262_1	1	0.0	1.0	0.0	1	1	1	1.0
1124	Mycobacterium~phage~Spartacus	Caudovirales	Siphoviridae	Che8virus	269_1	Clustered	34	VC_269_1	34	0.5335	1.0	0.5335	2	1	1	0.7914
1125	Mycobacterium~phage~Spud	Caudovirales	Myoviridae	Bxz1virus	304_0	Clustered	21	VC_304_0	21	0.929	1.0	0.929	2	1	1	1.0
1126	Mycobacterium~phage~Squirty	Caudovirales	Siphoviridae	Cheoctovirus	269_7	Clustered/Singleton	1	VC_269_7	1	0.0	1.0	0.0	1	1	1	1.0
1127	Mycobacterium~phage~Suffolk	Caudovirales	Siphoviridae	Pg1virus	63_0	Clustered	21	VC_63_0	21	0.5593	1.0	0.5593	2	1	1	1.0
1128	Mycobacterium~phage~SweetiePie	Caudovirales	Siphoviridae	Fromanvirus	274_2	Clustered	31	VC_274_2	31	0.5541	1.0	0.5541	2	1	1	0.871
1129	Mycobacterium~phage~Swish	Caudovirales	Siphoviridae	Pg1virus	63_0	Clustered	21	VC_63_0	21	0.5593	1.0	0.5593	2	1	1	1.0
1130	Mycobacterium~phage~Switzer	Caudovirales	Siphoviridae	L5virus	303_0	Clustered	49	VC_303_0	49	0.998	1.0	0.998	2	1	1	1.0
1131	Mycobacterium~phage~TM4	Caudovirales	Siphoviridae	Tm4virus	263_2	Clustered	13	VC_263_2	13	0.5339	1.0	0.5339	2	1	1	0.7949
1132	Mycobacterium~phage~Taj	Caudovirales	Siphoviridae	Che8virus	269_1	Clustered	34	VC_269_1	34	0.5335	1.0	0.5335	2	1	1	0.7914
1133	Mycobacterium~phage~Tasp14	Caudovirales	Siphoviridae	Fromanvirus	303_0	Clustered	49	VC_303_0	49	0.998	1.0	0.998	2	1	1	1.0
1134	Mycobacterium~phage~TheloniousMonk	Caudovirales	Siphoviridae	Fromanvirus	303_0	Clustered	49	VC_303_0	49	0.998	1.0	0.998	2	1	1	1.0
1135	Mycobacterium~phage~Thibault	Caudovirales	Siphoviridae	Omegavirus	305_3	Clustered/Singleton	1	VC_305_3	1	0.0	1.0	0.0	1	1	1	1.0
1136	Mycobacterium~phage~Tiffany	Caudovirales	Siphoviridae	Fromanvirus	275_0	Clustered	9	VC_275_0	9	0.224	1.0	0.224	2	1	1	1.0
1137	Mycobacterium~phage~Timshel	Caudovirales	Siphoviridae	L5virus	275_1	Clustered	14	VC_275_1	14	0.3176	1.0	0.3176	2	1	1	0.9011
1138	Mycobacterium~phage~Tonenili	Caudovirales	Myoviridae	Bixzunavirus	304_0	Clustered	21	VC_304_0	21	0.929	1.0	0.929	2	1	1	1.0
1139	Mycobacterium~phage~Toto	Caudovirales	Siphoviridae	Cjw1virus	308_0	Clustered	25	VC_308_0	25	0.966	1.0	0.966	2	1	1	1.0
1140	Mycobacterium~phage~Trike	Caudovirales	Siphoviridae	Fromanvirus	275_1	Clustered	14	VC_275_1	14	0.3176	1.0	0.3176	2	1	1	0.9011
1141	Mycobacterium~phage~Trixie	Caudovirales	Siphoviridae	L5virus	274_2	Clustered	31	VC_274_2	31	0.5541	1.0	0.5541	2	1	1	0.871
1142	Mycobacterium~phage~Troll4	Caudovirales	Siphoviridae	Pbi1virus	270_0	Clustered	5	VC_270_0	5	0.6286	0.99999972	0.6286	3	1	1	1.0
1143	Mycobacterium~phage~Trouble	Caudovirales	Siphoviridae	Fromanvirus	303_0	Clustered	49	VC_303_0	49	0.998	1.0	0.998	2	1	1	1.0
1144	Mycobacterium~phage~Turbido	Caudovirales	Siphoviridae	L5virus	274_2	Clustered	31	VC_274_2	31	0.5541	1.0	0.5541	2	1	1	0.871
1145	Mycobacterium~phage~Turj99	Caudovirales	Siphoviridae	Fromanvirus	303_0	Clustered	49	VC_303_0	49	0.998	1.0	0.998	2	1	1	1.0
1146	Mycobacterium~phage~Tweety	Caudovirales	Siphoviridae	Che8virus	269_1	Clustered	34	VC_269_1	34	0.5335	1.0	0.5335	2	1	1	0.7914
1147	Mycobacterium~phage~Twister	Caudovirales	Siphoviridae	L5virus	275_1	Clustered	14	VC_275_1	14	0.3176	1.0	0.3176	2	1	1	0.9011
1148	Mycobacterium~phage~U2	Caudovirales	Siphoviridae	L5virus	303_0	Clustered	49	VC_303_0	49	0.998	1.0	0.998	2	1	1	1.0
1149	Mycobacterium~phage~UncleHowie	Caudovirales	Siphoviridae	Pg1virus	63_0	Clustered	21	VC_63_0	21	0.5593	1.0	0.5593	2	1	1	1.0
1150	Mycobacterium~phage~Validus	Caudovirales	Siphoviridae	Timquatrovirus	263_2	Clustered	13	VC_263_2	13	0.5339	1.0	0.5339	2	1	1	0.7949
1151	Mycobacterium~phage~Velveteen	Caudovirales	Siphoviridae	Cheoctovirus	269_5	Clustered	2	VC_269_5	2	0.0226	0.95644656	0.0216	1	1	1	1.0
1152	Mycobacterium~phage~Violet	Caudovirales	Siphoviridae	L5virus	303_0	Clustered	49	VC_303_0	49	0.998	1.0	0.998	2	1	1	1.0
1153	Mycobacterium~phage~Vista	Caudovirales	Siphoviridae	Pg1virus	63_0	Clustered	21	VC_63_0	21	0.5593	1.0	0.5593	2	1	1	1.0
1154	Mycobacterium~phage~VohminGhazi	Caudovirales	Siphoviridae	Fromanvirus	274_0	Clustered	5	VC_274_0	5	0.1075	0.99999997	0.1075	1	1	1	1.0
1155	Mycobacterium~phage~Vortex	Caudovirales	Siphoviridae	Pegunavirus	63_0	Clustered	21	VC_63_0	21	0.5593	1.0	0.5593	2	1	1	1.0
1156	Mycobacterium~phage~WIVsmall	Caudovirales	Siphoviridae	Cheoctovirus	269_6	Clustered/Singleton	1	VC_269_6	1	0.0	1.0	0.0	1	1	1	1.0
1157	Mycobacterium~phage~Wanda	Caudovirales	Siphoviridae	Omegavirus	305_1	Clustered	3	VC_305_1	3	0.1128	0.9970292	0.1124	1	1	1	1.0
1158	Mycobacterium~phage~Wee	Caudovirales	Siphoviridae	Che8virus	269_1	Clustered	34	VC_269_1	34	0.5335	1.0	0.5335	2	1	1	0.7914
1159	Mycobacterium~phage~Wheeler	Caudovirales	Siphoviridae	Fromanvirus	303_0	Clustered	49	VC_303_0	49	0.998	1.0	0.998	2	1	1	1.0
1160	Mycobacterium~phage~Whirlwind	Caudovirales	Siphoviridae	Bronvirus	306_0	Clustered	9	VC_306_0	9	0.7957	1.0	0.7957	1	1	1	1.0
1161	Mycobacterium~phage~Wile	Caudovirales	Siphoviridae	Fromanvirus	275_1	Clustered	14	VC_275_1	14	0.3176	1.0	0.3176	2	1	1	0.9011
1162	Mycobacterium~phage~XFactor	Caudovirales	Siphoviridae	Cheoctovirus	269_1	Clustered	34	VC_269_1	34	0.5335	1.0	0.5335	2	1	1	0.7914
1163	Mycobacterium~phage~Xeno	Caudovirales	Siphoviridae	Charlievirus	92_0	Clustered	10	VC_92_0	10	0.4618	1.0	0.4618	3	1	1	1.0
1164	Mycobacterium~phage~Zaka	Caudovirales	Siphoviridae	Fromanvirus	274_0	Clustered	5	VC_274_0	5	0.1075	0.99999997	0.1075	1	1	1	1.0
1165	Mycobacterium~phage~ZoeJ	Caudovirales	Siphoviridae	Timquatrovirus	263_2	Clustered	13	VC_263_2	13	0.5339	1.0	0.5339	2	1	1	0.7949
1166	Mycobacterium~phage~vB_MapS_FF47	Caudovirales	Siphoviridae	Ff47virus	264_0	Clustered	2	VC_264_0	2	0.2378	0.95402977	0.2268	1	1	1	1.0
1167	Mycobacterium~virus~244	Caudovirales	Siphoviridae	Cjw1virus	308_0	Clustered	25	VC_308_0	25	0.966	1.0	0.966	2	1	1	1.0
1168	Mycobacterium~virus~Alma	Caudovirales	Siphoviridae	L5virus	274_1	Clustered	3	VC_274_1	3	0.0529	0.99851447	0.0528	2	1	1	1.0
1169	Mycobacterium~virus~Anaya	Caudovirales	Siphoviridae	Tm4virus	263_2	Clustered	13	VC_263_2	13	0.5339	1.0	0.5339	2	1	1	0.7949
1170	Mycobacterium~virus~Angelica	Caudovirales	Siphoviridae	Tm4virus	263_2	Clustered	13	VC_263_2	13	0.5339	1.0	0.5339	2	1	1	0.7949
1171	Mycobacterium~virus~Ardmore	Caudovirales	Siphoviridae	Che8virus	269_1	Clustered	34	VC_269_1	34	0.5335	1.0	0.5335	2	1	1	0.7914
1172	Mycobacterium~virus~Avani	Caudovirales	Siphoviridae	Che8virus	279_0	Clustered	4	VC_279_0	4	0.0865	0.99998524	0.0865	2	1	1	1.0
1173	Mycobacterium~virus~Bask21	Caudovirales	Siphoviridae	Cjw1virus	308_0	Clustered	25	VC_308_0	25	0.966	1.0	0.966	2	1	1	1.0
1174	Mycobacterium~virus~Bethlehem	Caudovirales	Siphoviridae	L5virus	303_0	Clustered	49	VC_303_0	49	0.998	1.0	0.998	2	1	1	1.0
1175	Mycobacterium~virus~Billknuckles	Caudovirales	Siphoviridae	L5virus	303_0	Clustered	49	VC_303_0	49	0.998	1.0	0.998	2	1	1	1.0
1176	Mycobacterium~virus~Boomer	Caudovirales	Siphoviridae	Che8virus	269_1	Clustered	34	VC_269_1	34	0.5335	1.0	0.5335	2	1	1	0.7914
1177	Mycobacterium~virus~Bron	Caudovirales	Siphoviridae	Bronvirus	306_0	Clustered	9	VC_306_0	9	0.7957	1.0	0.7957	1	1	1	1.0
1178	Mycobacterium~virus~Bruns	Caudovirales	Siphoviridae	L5virus	303_0	Clustered	49	VC_303_0	49	0.998	1.0	0.998	2	1	1	1.0
1179	Mycobacterium~virus~Bxb1	Caudovirales	Siphoviridae	L5virus	303_0	Clustered	49	VC_303_0	49	0.998	1.0	0.998	2	1	1	1.0
1180	Mycobacterium~virus~Bxz2	Caudovirales	Siphoviridae	L5virus	275_0	Clustered	9	VC_275_0	9	0.224	1.0	0.224	2	1	1	1.0
1181	Mycobacterium~virus~CJW1	Caudovirales	Siphoviridae	Cjw1virus	308_0	Clustered	25	VC_308_0	25	0.966	1.0	0.966	2	1	1	1.0
1182	Mycobacterium~virus~Che12	Caudovirales	Siphoviridae	L5virus	274_2	Clustered	31	VC_274_2	31	0.5541	1.0	0.5541	2	1	1	0.871
1183	Mycobacterium~virus~Che8	Caudovirales	Siphoviridae	Che8virus	269_1	Clustered	34	VC_269_1	34	0.5335	1.0	0.5335	2	1	1	0.7914
1184	Mycobacterium~virus~Che9d	Caudovirales	Siphoviridae	Che8virus	279_0	Clustered	4	VC_279_0	4	0.0865	0.99998524	0.0865	2	1	1	1.0
1185	Mycobacterium~virus~Corndog	Caudovirales	Siphoviridae	Corndogvirus	309_0	Clustered	4	VC_309_0	4	0.5564	0.99998589	0.5564	1	1	1	1.0
1186	Mycobacterium~virus~Courthouse	Caudovirales	Siphoviridae	Omegavirus	305_0	Clustered	3	VC_305_0	3	0.1142	0.99737279	0.1139	1	1	1	1.0
1187	Mycobacterium~virus~Crimd	Caudovirales	Siphoviridae	Tm4virus	263_2	Clustered	13	VC_263_2	13	0.5339	1.0	0.5339	2	1	1	0.7949
1188	Mycobacterium~virus~D29	Caudovirales	Siphoviridae	L5virus	274_2	Clustered	31	VC_274_2	31	0.5541	1.0	0.5541	2	1	1	0.871
1189	Mycobacterium~virus~Deadp	Caudovirales	Siphoviridae	Che8virus	269_1	Clustered	34	VC_269_1	34	0.5335	1.0	0.5335	2	1	1	0.7914
1190	Mycobacterium~virus~Doom	Caudovirales	Siphoviridae	L5virus	303_0	Clustered	49	VC_303_0	49	0.998	1.0	0.998	2	1	1	1.0
1191	Mycobacterium~virus~Dorothy	Caudovirales	Siphoviridae	Che8virus	269_1	Clustered	34	VC_269_1	34	0.5335	1.0	0.5335	2	1	1	0.7914
1192	Mycobacterium~virus~Drago	Caudovirales	Siphoviridae	Che8virus	269_1	Clustered	34	VC_269_1	34	0.5335	1.0	0.5335	2	1	1	0.7914
1193	Mycobacterium~virus~Euphoria	Caudovirales	Siphoviridae	L5virus	303_0	Clustered	49	VC_303_0	49	0.998	1.0	0.998	2	1	1	1.0
1194	Mycobacterium~virus~Eureka	Caudovirales	Siphoviridae	Cjw1virus	308_0	Clustered	25	VC_308_0	25	0.966	1.0	0.966	2	1	1	1.0
1195	Mycobacterium~virus~Faith1	Caudovirales	Siphoviridae	Bronvirus	306_0	Clustered	9	VC_306_0	9	0.7957	1.0	0.7957	1	1	1	1.0
1196	Mycobacterium~virus~Fionnbarth	Caudovirales	Siphoviridae	Tm4virus	263_0	Clustered	2	VC_263_0	2	0.0753	0.95469116	0.0719	2	1	1	1.0
1197	Mycobacterium~virus~Firecracker	Caudovirales	Siphoviridae	Corndogvirus	309_0	Clustered	4	VC_309_0	4	0.5564	0.99998589	0.5564	1	1	1	1.0
1198	Mycobacterium~virus~Fruitloop	Caudovirales	Siphoviridae	Che8virus	269_1	Clustered	34	VC_269_1	34	0.5335	1.0	0.5335	2	1	1	0.7914
1199	Mycobacterium~virus~Gumbie	Caudovirales	Siphoviridae	Che8virus	269_1	Clustered	34	VC_269_1	34	0.5335	1.0	0.5335	2	1	1	0.7914
1200	Mycobacterium~virus~Halo	Caudovirales	Siphoviridae	Liefievirus	278_0	Clustered	9	VC_278_0	9	0.5375	1.0	0.5375	1	1	1	1.0
1201	Mycobacterium~virus~Jasper	Caudovirales	Siphoviridae	L5virus	303_0	Clustered	49	VC_303_0	49	0.998	1.0	0.998	2	1	1	1.0
1202	Mycobacterium~virus~KBG	Caudovirales	Siphoviridae	L5virus	303_0	Clustered	49	VC_303_0	49	0.998	1.0	0.998	2	1	1	1.0
1203	Mycobacterium~virus~Kostya	Caudovirales	Siphoviridae	Cjw1virus	308_0	Clustered	25	VC_308_0	25	0.966	1.0	0.966	2	1	1	1.0
1204	Mycobacterium~virus~Kugel	Caudovirales	Siphoviridae	L5virus	303_0	Clustered	49	VC_303_0	49	0.998	1.0	0.998	2	1	1	1.0
1205	Mycobacterium~virus~L5	Caudovirales	Siphoviridae	L5virus	274_2	Clustered	31	VC_274_2	31	0.5541	1.0	0.5541	2	1	1	0.871
1206	Mycobacterium~virus~Larva	Caudovirales	Siphoviridae	Tm4virus	263_1	Clustered	5	VC_263_1	5	0.2279	0.99999994	0.2279	2	1	1	1.0
1207	Mycobacterium~virus~Liefie	Caudovirales	Siphoviridae	Liefievirus	278_0	Clustered	9	VC_278_0	9	0.5375	1.0	0.5375	1	1	1	1.0
1208	Mycobacterium~virus~Llij	Caudovirales	Siphoviridae	Che8virus	269_1	Clustered	34	VC_269_1	34	0.5335	1.0	0.5335	2	1	1	0.7914
1209	Mycobacterium~virus~Marcell	Caudovirales	Siphoviridae	L5virus	303_0	Clustered	49	VC_303_0	49	0.998	1.0	0.998	2	1	1	1.0
1210	Mycobacterium~virus~Mutaforma13	Caudovirales	Siphoviridae	Che8virus	269_1	Clustered	34	VC_269_1	34	0.5335	1.0	0.5335	2	1	1	0.7914
1211	Mycobacterium~virus~Nepal	Caudovirales	Siphoviridae	L5virus	303_0	Clustered	49	VC_303_0	49	0.998	1.0	0.998	2	1	1	1.0
1212	Mycobacterium~virus~Omega	Caudovirales	Siphoviridae	Omegavirus	305_4	Clustered/Singleton	1	VC_305_4	1	0.0	1.0	0.0	1	1	1	1.0
1213	Mycobacterium~virus~Optimus	Caudovirales	Siphoviridae	Omegavirus	305_1	Clustered	3	VC_305_1	3	0.1128	0.9970292	0.1124	1	1	1	1.0
1214	Mycobacterium~virus~PMC	Caudovirales	Siphoviridae	Che8virus	269_1	Clustered	34	VC_269_1	34	0.5335	1.0	0.5335	2	1	1	0.7914
1215	Mycobacterium~virus~Pacc40	Caudovirales	Siphoviridae	Che8virus	269_1	Clustered	34	VC_269_1	34	0.5335	1.0	0.5335	2	1	1	0.7914
1216	Mycobacterium~virus~Peaches	Caudovirales	Siphoviridae	L5virus	275_1	Clustered	14	VC_275_1	14	0.3176	1.0	0.3176	2	1	1	0.9011
1217	Mycobacterium~virus~Perseus	Caudovirales	Siphoviridae	L5virus	303_0	Clustered	49	VC_303_0	49	0.998	1.0	0.998	2	1	1	1.0
1218	Mycobacterium~virus~Porky	Caudovirales	Siphoviridae	Cjw1virus	308_0	Clustered	25	VC_308_0	25	0.966	1.0	0.966	2	1	1	1.0
1219	Mycobacterium~virus~Pukovnik	Caudovirales	Siphoviridae	L5virus	274_2	Clustered	31	VC_274_2	31	0.5541	1.0	0.5541	2	1	1	0.871
1220	Mycobacterium~virus~Pumpkin	Caudovirales	Siphoviridae	Cjw1virus	308_0	Clustered	25	VC_308_0	25	0.966	1.0	0.966	2	1	1	1.0
1221	Mycobacterium~virus~Ramsey	Caudovirales	Siphoviridae	Che8virus	269_2	Clustered	3	VC_269_2	3	0.0296	0.99850817	0.0295	2	1	1	1.0
1222	Mycobacterium~virus~Rumpelstiltskin	Caudovirales	Siphoviridae	Bronvirus	306_0	Clustered	9	VC_306_0	9	0.7957	1.0	0.7957	1	1	1	1.0
1223	Mycobacterium~virus~SG4	Caudovirales	Siphoviridae	Che8virus	269_1	Clustered	34	VC_269_1	34	0.5335	1.0	0.5335	2	1	1	0.7914
1224	Mycobacterium~virus~Wonder	Caudovirales	Siphoviridae	L5virus	275_0	Clustered	9	VC_275_0	9	0.224	1.0	0.224	2	1	1	1.0
1225	Mycobacterium~virus~Yoshi	Caudovirales	Siphoviridae	Che8virus	279_0	Clustered	4	VC_279_0	4	0.0865	0.99998524	0.0865	2	1	1	1.0
1226	Mycobacterium~virus~lockley	Caudovirales	Siphoviridae	L5virus	303_0	Clustered	49	VC_303_0	49	0.998	1.0	0.998	2	1	1	1.0
1227	Mycoplasma~phage~MAV1	Unassigned	Unassigned	Unassigned	311_0	Clustered	2	VC_311_0	2	1.0	1.0	1.0	1	1	1	1.0
1228	Mycoplasma~phage~phiMFV1	Unassigned	Unassigned	Unassigned	311_0	Clustered	2	VC_311_0	2	1.0	1.0	1.0	1	1	1	1.0
1229	Nonlabens~phage~P12024L	Caudovirales	Siphoviridae	P12024virus	312_0	Clustered	2	VC_312_0	2	1.0	1.0	1.0	1	1	1	1.0
1230	Nonlabens~phage~P12024S	Caudovirales	Siphoviridae	P12024virus	312_0	Clustered	2	VC_312_0	2	1.0	1.0	1.0	1	1	1	1.0
1231	Oenococcus~phage~phi9805	Unassigned	Unassigned	Unassigned	146_0	Clustered	3	VC_146_0	3	0.544	0.99718773	0.5425	1	1	1	1.0
1232	Oenococcus~phage~phiS11	Unassigned	Unassigned	Unassigned	146_0	Clustered	3	VC_146_0	3	0.544	0.99718773	0.5425	1	1	1	1.0
1233	Oenococcus~phage~phiS13	Unassigned	Unassigned	Unassigned	146_0	Clustered	3	VC_146_0	3	0.544	0.99718773	0.5425	1	1	1	1.0
1234	Paenibacillus~phage~Diva	Caudovirales	Siphoviridae	Sitaravirus	119_0	Clustered	9	VC_119_0	9	0.7112	1.0	0.7112	1	1	1	1.0
1235	Paenibacillus~phage~Fern	Caudovirales	Siphoviridae	Sitaravirus	119_0	Clustered	9	VC_119_0	9	0.7112	1.0	0.7112	1	1	1	1.0
1236	Paenibacillus~phage~HB10c2	Caudovirales	Siphoviridae	Sitaravirus	119_0	Clustered	9	VC_119_0	9	0.7112	1.0	0.7112	1	1	1	1.0
1237	Paenibacillus~phage~Rani	Caudovirales	Siphoviridae	Sitaravirus	119_0	Clustered	9	VC_119_0	9	0.7112	1.0	0.7112	1	1	1	1.0
1238	Paenibacillus~phage~Shelly	Caudovirales	Siphoviridae	Sitaravirus	119_0	Clustered	9	VC_119_0	9	0.7112	1.0	0.7112	1	1	1	1.0
1239	Paenibacillus~phage~Sitara	Caudovirales	Siphoviridae	Sitaravirus	119_0	Clustered	9	VC_119_0	9	0.7112	1.0	0.7112	1	1	1	1.0
1240	Paenibacillus~phage~Tripp	Caudovirales	Siphoviridae	Trippvirus	138_0	Clustered	2	VC_138_0	2	0.382	0.93189513	0.356	2	1	1	1.0
1241	Paenibacillus~phage~Willow	Caudovirales	Siphoviridae	Sitaravirus	119_0	Clustered	9	VC_119_0	9	0.7112	1.0	0.7112	1	1	1	1.0
1242	Paenibacillus~phage~Xenia	Caudovirales	Siphoviridae	Sitaravirus	119_0	Clustered	9	VC_119_0	9	0.7112	1.0	0.7112	1	1	1	1.0
1243	Paenibacillus~phage~phiIBB_Pl23	Caudovirales	Siphoviridae	Sitaravirus	119_0	Clustered	9	VC_119_0	9	0.7112	1.0	0.7112	1	1	1	1.0
1244	Pantoea~phage~LIMElight	Caudovirales	Podoviridae	Phikmvvirus	40_0	Clustered	4	VC_40_0	4	0.0805	0.99812075	0.0803	2	1	1	1.0
1245	Pantoea~phage~vB_PagS_Vid5	Caudovirales	Siphoviridae	Vidquintavirus	11_1	Clustered	6	VC_11_1	6	0.4875	1.0	0.4875	2	1	1	1.0
1246	Parabacteroides~phage~YZ-2015a	Unassigned	Microviridae	Unassigned	81_0	Clustered	5	VC_81_0	5	0.455	0.99999974	0.455	1	1	1	1.0
1247	Parabacteroides~phage~YZ-2015b	Unassigned	Microviridae	Unassigned	81_0	Clustered	5	VC_81_0	5	0.455	0.99999974	0.455	1	1	1	1.0
1248	Paracoccus~phage~vB_PmaS-R3	Caudovirales	Siphoviridae	Unassigned	9_0	Clustered	12	VC_9_0	12	0.6996	1.0	0.6996	4	1	1	1.0
1249	Pasteurella~virus~F108	Caudovirales	Myoviridae	Hp1virus	76_0	Clustered	7	VC_76_0	7	0.558	1.0	0.558	2	1	1	1.0
1250	Pectobacterium~bacteriophage~PM2	Caudovirales	Myoviridae	Unassigned	41_3	Clustered/Singleton	1	VC_41_3	1	0.0	1.0	0.0	1	1	1	1.0
1251	Pectobacterium~phage~CBB	Caudovirales	Myoviridae	Eneladusvirus	78_3	Clustered/Singleton	1	VC_78_3	1	0.0	1.0	0.0	1	1	1	1.0
1252	Pectobacterium~phage~My1	Caudovirales	Siphoviridae	Myunavirus	252_2	Clustered	3	VC_252_2	3	0.0515	0.79706161	0.0411	3	1	1	1.0
1253	Pectobacterium~phage~PM1	Caudovirales	Myoviridae	Unassigned	64_0	Clustered	5	VC_64_0	5	1.0	1.0	1.0	1	1	1	1.0
1254	Pectobacterium~phage~PP1	Caudovirales	Podoviridae	Zindervirus	245_0	Clustered	15	VC_245_0	15	1.0	1.0	1.0	2	1	1	1.0
1255	Pediococcus~virus~cIP1	Caudovirales	Siphoviridae	Phijl1virus	246_0	Clustered	3	VC_246_0	3	0.8701	0.99287596	0.8639	1	1	1	1.0
1256	Phormidium~phage~MIS-PhV1A	Unassigned	Unassigned	Unassigned	313_0	Clustered	2	VC_313_0	2	1.0	1.0	1.0	1	1	1	1.0
1257	Phormidium~phage~MIS-PhV1B	Unassigned	Unassigned	Unassigned	313_0	Clustered	2	VC_313_0	2	1.0	1.0	1.0	1	1	1	1.0
1258	Phormidium~virus~WMP3	Caudovirales	Podoviridae	Unassigned	85_0	Clustered	2	VC_85_0	2	0.5766	0.86822376	0.5006	1	1	1	1.0
1259	Polaribacter~phage~P12002L	Caudovirales	Siphoviridae	P12002virus	314_0	Clustered	2	VC_314_0	2	1.0	1.0	1.0	1	1	1	1.0
1260	Polaribacter~phage~P12002S	Caudovirales	Siphoviridae	P12002virus	314_0	Clustered	2	VC_314_0	2	1.0	1.0	1.0	1	1	1	1.0
1261	Prochlorococcus~phage~MED4-184	Caudovirales	Myoviridae	Unassigned	232_0	Clustered	2	VC_232_0	2	0.7663	0.72985431	0.5593	1	2	2	1.0
1262	Prochlorococcus~phage~MED4-213	Caudovirales	Myoviridae	Unassigned	32_0	Clustered	3	VC_32_0	3	0.0491	0.9984793	0.0491	1	1	1	1.0
1263	Prochlorococcus~phage~P-GSP1	Caudovirales	Podoviridae	Unassigned	207_0	Clustered	19	VC_207_0	19	0.9054	1.0	0.9054	1	1	1	1.0
1264	Prochlorococcus~phage~P-HM1	Caudovirales	Myoviridae	Unassigned	32_0	Clustered	3	VC_32_0	3	0.0491	0.9984793	0.0491	1	1	1	1.0
1265	Prochlorococcus~phage~P-HM2	Caudovirales	Myoviridae	Unassigned	32_0	Clustered	3	VC_32_0	3	0.0491	0.9984793	0.0491	1	1	1	1.0
1266	Prochlorococcus~phage~P-RSM4	Caudovirales	Myoviridae	Unassigned	32_30	Clustered/Singleton	1	VC_32_30	1	0.0	1.0	0.0	1	1	1	1.0
1267	Prochlorococcus~phage~P-SSM2	Caudovirales	Myoviridae	Unassigned	32_21	Clustered/Singleton	1	VC_32_21	1	0.0	1.0	0.0	1	1	1	1.0
1268	Prochlorococcus~phage~P-SSM3	Caudovirales	Myoviridae	Unassigned	32_28	Clustered	2	VC_32_28	2	0.016	0.94655976	0.0152	1	1	1	1.0
1269	Prochlorococcus~phage~P-SSM4	Caudovirales	Myoviridae	Unassigned	32_28	Clustered	2	VC_32_28	2	0.016	0.94655976	0.0152	1	1	1	1.0
1270	Prochlorococcus~phage~P-SSM7	Caudovirales	Myoviridae	Unassigned	32_31	Clustered/Singleton	1	VC_32_31	1	0.0	1.0	0.0	1	1	1	1.0
1271	Prochlorococcus~phage~P-SSP10	Caudovirales	Podoviridae	Unassigned	207_0	Clustered	19	VC_207_0	19	0.9054	1.0	0.9054	1	1	1	1.0
1272	Prochlorococcus~phage~P-SSP3	Caudovirales	Podoviridae	Unassigned	207_0	Clustered	19	VC_207_0	19	0.9054	1.0	0.9054	1	1	1	1.0
1273	Prochlorococcus~phage~P-TIM68	Caudovirales	Myoviridae	Unassigned	32_19	Clustered/Singleton	1	VC_32_19	1	0.0	1.0	0.0	1	1	1	1.0
1274	Prochlorococcus~phage~Syn1	Caudovirales	Myoviridae	Unassigned	32_17	Clustered/Singleton	1	VC_32_17	1	0.0	1.0	0.0	1	1	1	1.0
1275	Prochlorococcus~phage~Syn33	Caudovirales	Myoviridae	Unassigned	32_6	Clustered	6	VC_32_6	6	0.074	0.99999991	0.074	1	1	1	1.0
1276	Prochlorococcus~virus~PSSP7	Caudovirales	Podoviridae	Unassigned	207_0	Clustered	19	VC_207_0	19	0.9054	1.0	0.9054	1	1	1	1.0
1277	Propionibacterium~phage~ATCC29399B_C	Caudovirales	Siphoviridae	Pa6virus	315_0	Clustered	70	VC_315_0	70	1.0	1.0	1.0	2	1	1	1.0
1278	Propionibacterium~phage~ATCC29399B_T	Caudovirales	Siphoviridae	Pa6virus	315_0	Clustered	70	VC_315_0	70	1.0	1.0	1.0	2	1	1	1.0
1279	Propionibacterium~phage~Anatole	Caudovirales	Siphoviridae	Anatolevirus	93_0	Clustered	6	VC_93_0	6	0.7489	0.99999984	0.7489	2	1	1	1.0
1280	Propionibacterium~phage~Attacne	Caudovirales	Siphoviridae	Pa6virus	315_0	Clustered	70	VC_315_0	70	1.0	1.0	1.0	2	1	1	1.0
1281	Propionibacterium~phage~B22	Caudovirales	Siphoviridae	Doucettevirus	93_0	Clustered	6	VC_93_0	6	0.7489	0.99999984	0.7489	2	1	1	1.0
1282	Propionibacterium~phage~B3	Caudovirales	Siphoviridae	Anatolevirus	93_0	Clustered	6	VC_93_0	6	0.7489	0.99999984	0.7489	2	1	1	1.0
1283	Propionibacterium~phage~BruceLethal	Caudovirales	Siphoviridae	Pahexavirus	315_0	Clustered	70	VC_315_0	70	1.0	1.0	1.0	2	1	1	1.0
1284	Propionibacterium~phage~Doucette	Caudovirales	Siphoviridae	Doucettevirus	93_0	Clustered	6	VC_93_0	6	0.7489	0.99999984	0.7489	2	1	1	1.0
1285	Propionibacterium~phage~E6	Caudovirales	Siphoviridae	Doucettevirus	93_0	Clustered	6	VC_93_0	6	0.7489	0.99999984	0.7489	2	1	1	1.0
1286	Propionibacterium~phage~Enoki	Caudovirales	Siphoviridae	Pahexavirus	315_0	Clustered	70	VC_315_0	70	1.0	1.0	1.0	2	1	1	1.0
1287	Propionibacterium~phage~G4	Caudovirales	Siphoviridae	Doucettevirus	93_0	Clustered	6	VC_93_0	6	0.7489	0.99999984	0.7489	2	1	1	1.0
1288	Propionibacterium~phage~Keiki	Caudovirales	Siphoviridae	Pa6virus	315_0	Clustered	70	VC_315_0	70	1.0	1.0	1.0	2	1	1	1.0
1289	Propionibacterium~phage~Kubed	Caudovirales	Siphoviridae	Pa6virus	315_0	Clustered	70	VC_315_0	70	1.0	1.0	1.0	2	1	1	1.0
1290	Propionibacterium~phage~Lauchelly	Caudovirales	Siphoviridae	Pa6virus	315_0	Clustered	70	VC_315_0	70	1.0	1.0	1.0	2	1	1	1.0
1291	Propionibacterium~phage~Moyashi	Caudovirales	Siphoviridae	Pahexavirus	315_0	Clustered	70	VC_315_0	70	1.0	1.0	1.0	2	1	1	1.0
1292	Propionibacterium~phage~MrAK	Caudovirales	Siphoviridae	Pa6virus	315_0	Clustered	70	VC_315_0	70	1.0	1.0	1.0	2	1	1	1.0
1293	Propionibacterium~phage~Ouroboros	Caudovirales	Siphoviridae	Pa6virus	315_0	Clustered	70	VC_315_0	70	1.0	1.0	1.0	2	1	1	1.0
1294	Propionibacterium~phage~P1.1	Caudovirales	Siphoviridae	Pa6virus	315_0	Clustered	70	VC_315_0	70	1.0	1.0	1.0	2	1	1	1.0
1295	Propionibacterium~phage~P100D	Caudovirales	Siphoviridae	Pa6virus	315_0	Clustered	70	VC_315_0	70	1.0	1.0	1.0	2	1	1	1.0
1296	Propionibacterium~phage~P100_1	Caudovirales	Siphoviridae	Pa6virus	315_0	Clustered	70	VC_315_0	70	1.0	1.0	1.0	2	1	1	1.0
1297	Propionibacterium~phage~P100_A	Caudovirales	Siphoviridae	Pa6virus	315_0	Clustered	70	VC_315_0	70	1.0	1.0	1.0	2	1	1	1.0
1298	Propionibacterium~phage~P101A	Caudovirales	Siphoviridae	Pa6virus	315_0	Clustered	70	VC_315_0	70	1.0	1.0	1.0	2	1	1	1.0
1299	Propionibacterium~phage~P104A	Caudovirales	Siphoviridae	Pa6virus	315_0	Clustered	70	VC_315_0	70	1.0	1.0	1.0	2	1	1	1.0
1300	Propionibacterium~phage~P105	Caudovirales	Siphoviridae	Pa6virus	315_0	Clustered	70	VC_315_0	70	1.0	1.0	1.0	2	1	1	1.0
1301	Propionibacterium~phage~P14.4	Caudovirales	Siphoviridae	Pa6virus	315_0	Clustered	70	VC_315_0	70	1.0	1.0	1.0	2	1	1	1.0
1302	Propionibacterium~phage~P9.1	Caudovirales	Siphoviridae	Pa6virus	315_0	Clustered	70	VC_315_0	70	1.0	1.0	1.0	2	1	1	1.0
1303	Propionibacterium~phage~PA1-14	Caudovirales	Siphoviridae	Pahexavirus	315_0	Clustered	70	VC_315_0	70	1.0	1.0	1.0	2	1	1	1.0
1304	Propionibacterium~phage~PA6	Caudovirales	Siphoviridae	Pa6virus	315_0	Clustered	70	VC_315_0	70	1.0	1.0	1.0	2	1	1	1.0
1305	Propionibacterium~phage~PAC1	Caudovirales	Siphoviridae	Pahexavirus	315_0	Clustered	70	VC_315_0	70	1.0	1.0	1.0	2	1	1	1.0
1306	Propionibacterium~phage~PAD20	Caudovirales	Siphoviridae	Pa6virus	315_0	Clustered	70	VC_315_0	70	1.0	1.0	1.0	2	1	1	1.0
1307	Propionibacterium~phage~PAS50	Caudovirales	Siphoviridae	Pa6virus	315_0	Clustered	70	VC_315_0	70	1.0	1.0	1.0	2	1	1	1.0
1308	Propionibacterium~phage~PHL009M11	Caudovirales	Siphoviridae	Pa6virus	315_0	Clustered	70	VC_315_0	70	1.0	1.0	1.0	2	1	1	1.0
1309	Propionibacterium~phage~PHL010M04	Caudovirales	Siphoviridae	Pahexavirus	315_0	Clustered	70	VC_315_0	70	1.0	1.0	1.0	2	1	1	1.0
1310	Propionibacterium~phage~PHL025M00	Caudovirales	Siphoviridae	Pa6virus	315_0	Clustered	70	VC_315_0	70	1.0	1.0	1.0	2	1	1	1.0
1311	Propionibacterium~phage~PHL030N00	Caudovirales	Siphoviridae	Pahexavirus	315_0	Clustered	70	VC_315_0	70	1.0	1.0	1.0	2	1	1	1.0
1312	Propionibacterium~phage~PHL037M02	Caudovirales	Siphoviridae	Pa6virus	315_0	Clustered	70	VC_315_0	70	1.0	1.0	1.0	2	1	1	1.0
1313	Propionibacterium~phage~PHL041M10	Caudovirales	Siphoviridae	Pa6virus	315_0	Clustered	70	VC_315_0	70	1.0	1.0	1.0	2	1	1	1.0
1314	Propionibacterium~phage~PHL055N00	Caudovirales	Siphoviridae	Pahexavirus	315_0	Clustered	70	VC_315_0	70	1.0	1.0	1.0	2	1	1	1.0
1315	Propionibacterium~phage~PHL060L00	Caudovirales	Siphoviridae	Pa6virus	315_0	Clustered	70	VC_315_0	70	1.0	1.0	1.0	2	1	1	1.0
1316	Propionibacterium~phage~PHL067M01	Caudovirales	Siphoviridae	Pa6virus	315_0	Clustered	70	VC_315_0	70	1.0	1.0	1.0	2	1	1	1.0
1317	Propionibacterium~phage~PHL067M10	Caudovirales	Siphoviridae	Pahexavirus	315_0	Clustered	70	VC_315_0	70	1.0	1.0	1.0	2	1	1	1.0
1318	Propionibacterium~phage~PHL070N00	Caudovirales	Siphoviridae	Pa6virus	315_0	Clustered	70	VC_315_0	70	1.0	1.0	1.0	2	1	1	1.0
1319	Propionibacterium~phage~PHL071N05	Caudovirales	Siphoviridae	Pa6virus	315_0	Clustered	70	VC_315_0	70	1.0	1.0	1.0	2	1	1	1.0
1320	Propionibacterium~phage~PHL082M00	Caudovirales	Siphoviridae	Pahexavirus	315_0	Clustered	70	VC_315_0	70	1.0	1.0	1.0	2	1	1	1.0
1321	Propionibacterium~phage~PHL082M03	Caudovirales	Siphoviridae	Pa6virus	315_0	Clustered	70	VC_315_0	70	1.0	1.0	1.0	2	1	1	1.0
1322	Propionibacterium~phage~PHL085N00	Caudovirales	Siphoviridae	Pahexavirus	315_0	Clustered	70	VC_315_0	70	1.0	1.0	1.0	2	1	1	1.0
1323	Propionibacterium~phage~PHL092M00	Caudovirales	Siphoviridae	Pa6virus	315_0	Clustered	70	VC_315_0	70	1.0	1.0	1.0	2	1	1	1.0
1324	Propionibacterium~phage~PHL095N00	Caudovirales	Siphoviridae	Pa6virus	315_0	Clustered	70	VC_315_0	70	1.0	1.0	1.0	2	1	1	1.0
1325	Propionibacterium~phage~PHL111M01	Caudovirales	Siphoviridae	Pa6virus	315_0	Clustered	70	VC_315_0	70	1.0	1.0	1.0	2	1	1	1.0
1326	Propionibacterium~phage~PHL112N00	Caudovirales	Siphoviridae	Pa6virus	315_0	Clustered	70	VC_315_0	70	1.0	1.0	1.0	2	1	1	1.0
1327	Propionibacterium~phage~PHL113M01	Caudovirales	Siphoviridae	Pa6virus	315_0	Clustered	70	VC_315_0	70	1.0	1.0	1.0	2	1	1	1.0
1328	Propionibacterium~phage~PHL114L00	Caudovirales	Siphoviridae	Pa6virus	315_0	Clustered	70	VC_315_0	70	1.0	1.0	1.0	2	1	1	1.0
1329	Propionibacterium~phage~PHL116M00	Caudovirales	Siphoviridae	Pa6virus	315_0	Clustered	70	VC_315_0	70	1.0	1.0	1.0	2	1	1	1.0
1330	Propionibacterium~phage~PHL117M00	Caudovirales	Siphoviridae	Pa6virus	315_0	Clustered	70	VC_315_0	70	1.0	1.0	1.0	2	1	1	1.0
1331	Propionibacterium~phage~PHL117M01	Caudovirales	Siphoviridae	Pa6virus	315_0	Clustered	70	VC_315_0	70	1.0	1.0	1.0	2	1	1	1.0
1332	Propionibacterium~phage~PHL132N00	Caudovirales	Siphoviridae	Pa6virus	315_0	Clustered	70	VC_315_0	70	1.0	1.0	1.0	2	1	1	1.0
1333	Propionibacterium~phage~PHL141N00	Caudovirales	Siphoviridae	Pa6virus	315_0	Clustered	70	VC_315_0	70	1.0	1.0	1.0	2	1	1	1.0
1334	Propionibacterium~phage~PHL150M00	Caudovirales	Siphoviridae	Pahexavirus	315_0	Clustered	70	VC_315_0	70	1.0	1.0	1.0	2	1	1	1.0
1335	Propionibacterium~phage~PHL151M00	Caudovirales	Siphoviridae	Pa6virus	315_0	Clustered	70	VC_315_0	70	1.0	1.0	1.0	2	1	1	1.0
1336	Propionibacterium~phage~PHL151N00	Caudovirales	Siphoviridae	Pa6virus	315_0	Clustered	70	VC_315_0	70	1.0	1.0	1.0	2	1	1	1.0
1337	Propionibacterium~phage~PHL152M00	Caudovirales	Siphoviridae	Pa6virus	315_0	Clustered	70	VC_315_0	70	1.0	1.0	1.0	2	1	1	1.0
1338	Propionibacterium~phage~PHL163M00	Caudovirales	Siphoviridae	Pa6virus	315_0	Clustered	70	VC_315_0	70	1.0	1.0	1.0	2	1	1	1.0
1339	Propionibacterium~phage~PHL171M01	Caudovirales	Siphoviridae	Pa6virus	315_0	Clustered	70	VC_315_0	70	1.0	1.0	1.0	2	1	1	1.0
1340	Propionibacterium~phage~PHL179M00	Caudovirales	Siphoviridae	Pa6virus	315_0	Clustered	70	VC_315_0	70	1.0	1.0	1.0	2	1	1	1.0
1341	Propionibacterium~phage~PHL194M00	Caudovirales	Siphoviridae	Pa6virus	315_0	Clustered	70	VC_315_0	70	1.0	1.0	1.0	2	1	1	1.0
1342	Propionibacterium~phage~PHL199M00	Caudovirales	Siphoviridae	Pa6virus	315_0	Clustered	70	VC_315_0	70	1.0	1.0	1.0	2	1	1	1.0
1343	Propionibacterium~phage~PHL301M00	Caudovirales	Siphoviridae	Pa6virus	315_0	Clustered	70	VC_315_0	70	1.0	1.0	1.0	2	1	1	1.0
1344	Propionibacterium~phage~PHL308M00	Caudovirales	Siphoviridae	Pa6virus	315_0	Clustered	70	VC_315_0	70	1.0	1.0	1.0	2	1	1	1.0
1345	Propionibacterium~phage~Pacnes~2012-15	Caudovirales	Siphoviridae	Pa6virus	315_0	Clustered	70	VC_315_0	70	1.0	1.0	1.0	2	1	1	1.0
1346	Propionibacterium~phage~Pirate	Caudovirales	Siphoviridae	Pa6virus	315_0	Clustered	70	VC_315_0	70	1.0	1.0	1.0	2	1	1	1.0
1347	Propionibacterium~phage~Procrass1	Caudovirales	Siphoviridae	Pa6virus	315_0	Clustered	70	VC_315_0	70	1.0	1.0	1.0	2	1	1	1.0
1348	Propionibacterium~phage~QueenBey	Caudovirales	Siphoviridae	Pahexavirus	315_0	Clustered	70	VC_315_0	70	1.0	1.0	1.0	2	1	1	1.0
1349	Propionibacterium~phage~SKKY	Caudovirales	Siphoviridae	Pa6virus	315_0	Clustered	70	VC_315_0	70	1.0	1.0	1.0	2	1	1	1.0
1350	Propionibacterium~phage~Solid	Caudovirales	Siphoviridae	Pa6virus	315_0	Clustered	70	VC_315_0	70	1.0	1.0	1.0	2	1	1	1.0
1351	Propionibacterium~phage~Stormborn	Caudovirales	Siphoviridae	Pa6virus	315_0	Clustered	70	VC_315_0	70	1.0	1.0	1.0	2	1	1	1.0
1352	Propionibacterium~phage~Wizzo	Caudovirales	Siphoviridae	Pa6virus	315_0	Clustered	70	VC_315_0	70	1.0	1.0	1.0	2	1	1	1.0
1353	Proteus~phage~PM~75	Caudovirales	Podoviridae	Unassigned	40_0	Clustered	4	VC_40_0	4	0.0805	0.99812075	0.0803	2	1	1	1.0
1354	Proteus~phage~PM~85	Caudovirales	Podoviridae	Zindervirus	245_0	Clustered	15	VC_245_0	15	1.0	1.0	1.0	2	1	1	1.0
1355	Proteus~phage~PM~93	Caudovirales	Podoviridae	Zindervirus	245_0	Clustered	15	VC_245_0	15	1.0	1.0	1.0	2	1	1	1.0
1356	Proteus~phage~PM135	Caudovirales	Siphoviridae	Novosibvirus	252_2	Clustered	3	VC_252_2	3	0.0515	0.79706161	0.0411	3	1	1	1.0
1357	Proteus~phage~PM16	Caudovirales	Podoviridae	Unassigned	40_0	Clustered	4	VC_40_0	4	0.0805	0.99812075	0.0803	2	1	1	1.0
1358	Proteus~phage~VB_PmiS-Isfahan	Caudovirales	Siphoviridae	Nonanavirus	238_0	Clustered	3	VC_238_0	3	0.9366	0.99373207	0.9307	1	2	1	1.0
1359	Proteus~phage~pPM_01	Caudovirales	Siphoviridae	Chivirus	22_0	Clustered	11	VC_22_0	11	0.7938	1.0	0.7938	1	1	1	1.0
1360	Proteus~phage~vB_PmiP_Pm5460	Caudovirales	Podoviridae	Zindervirus	245_0	Clustered	15	VC_245_0	15	1.0	1.0	1.0	2	1	1	1.0
1361	Providencia~phage~Redjac	Caudovirales	Siphoviridae	Chivirus	22_0	Clustered	11	VC_22_0	11	0.7938	1.0	0.7938	1	1	1	1.0
1362	Providencia~phage~vB_PreS_PR1	Caudovirales	Siphoviridae	Priunavirus	252_2	Clustered	3	VC_252_2	3	0.0515	0.79706161	0.0411	3	1	1	1.0
1363	Pseudoalteromonas~phage~Cr39582	Unassigned	Corticoviridae	Corticovirus	317_0	Clustered	2	VC_317_0	2	1.0	1.0	1.0	1	1	1	1.0
1364	Pseudoalteromonas~phage~H103	Caudovirales	Siphoviridae	Unassigned	65_0	Clustered	3	VC_65_0	3	0.1934	0.98914534	0.1913	1	1	1	1.0
1365	Pseudoalteromonas~phage~PH1	Caudovirales	Podoviridae	Kafunavirus	237_0	Clustered	3	VC_237_0	3	1.0	1.0	1.0	2	1	1	1.0
1366	Pseudoalteromonas~phage~Pq0	Caudovirales	Siphoviridae	Unassigned	172_0	Clustered	3	VC_172_0	3	0.5243	0.98018259	0.5139	1	1	1	1.0
1367	Pseudoalteromonas~virus~PM2	Unassigned	Corticoviridae	Corticovirus	317_0	Clustered	2	VC_317_0	2	1.0	1.0	1.0	1	1	1	1.0
1368	Pseudomonad~phage~gh-1	Caudovirales	Podoviridae	T7virus	206_0	Clustered	60	VC_206_0	60	0.9832	1.0	0.9832	4	1	1	1.0
1369	Pseudomonas~phage~14-1	Caudovirales	Myoviridae	Pbunavirus	178_0	Clustered	18	VC_178_0	18	0.8787	1.0	0.8787	1	1	1	1.0
1370	Pseudomonas~phage~201phi2-1	Caudovirales	Myoviridae	Phikzvirus	225_1	Clustered	2	VC_225_1	2	0.0712	0.93563822	0.0666	1	1	1	0.0
1371	Pseudomonas~phage~73	Caudovirales	Siphoviridae	Septima3virus	9_0	Clustered	12	VC_9_0	12	0.6996	1.0	0.6996	4	1	1	1.0
1372	Pseudomonas~phage~Andromeda	Caudovirales	Podoviridae	Bifseptvirus	72_0	Clustered	15	VC_72_0	15	0.7255	1.0	0.7255	6	1	1	1.0
1373	Pseudomonas~phage~B3	Caudovirales	Siphoviridae	Beetrevirus	182_0	Clustered	5	VC_182_0	5	0.3078	0.99999992	0.3078	2	1	1	1.0
1374	Pseudomonas~phage~Bf7	Caudovirales	Podoviridae	Bifseptvirus	72_0	Clustered	15	VC_72_0	15	0.7255	1.0	0.7255	6	1	1	1.0
1375	Pseudomonas~phage~Bjorn	Caudovirales	Podoviridae	Bjornvirus	208_0	Clustered	12	VC_208_0	12	0.9468	1.0	0.9468	5	1	1	1.0
1376	Pseudomonas~phage~C11	Caudovirales	Myoviridae	Pakpunavirus	51_0	Clustered	15	VC_51_0	15	0.6788	1.0	0.6788	1	1	1	1.0
1377	Pseudomonas~phage~DL54	Caudovirales	Podoviridae	Bruynoghevirus	208_0	Clustered	12	VC_208_0	12	0.9468	1.0	0.9468	5	1	1	1.0
1378	Pseudomonas~phage~DL60	Caudovirales	Myoviridae	Pbunavirus	178_0	Clustered	18	VC_178_0	18	0.8787	1.0	0.8787	1	1	1	1.0
1379	Pseudomonas~phage~DL62	Caudovirales	Podoviridae	Phikmvvirus	227_0	Clustered	11	VC_227_0	11	0.7129	1.0	0.7129	1	1	1	1.0
1380	Pseudomonas~phage~DL64	Caudovirales	Podoviridae	Litunavirus	21_0	Clustered	9	VC_21_0	9	0.6196	1.0	0.6196	2	1	1	1.0
1381	Pseudomonas~phage~DL68	Caudovirales	Myoviridae	Pbunavirus	178_0	Clustered	18	VC_178_0	18	0.8787	1.0	0.8787	1	1	1	1.0
1382	Pseudomonas~phage~EL	Caudovirales	Myoviridae	Elvirus	226_1	Clustered	3	VC_226_1	3	0.1346	0.99601424	0.134	3	1	1	0.6667
1383	Pseudomonas~phage~F10	Caudovirales	Siphoviridae	Unassigned	240_0	Clustered	3	VC_240_0	3	0.7581	0.99542416	0.7546	1	1	1	1.0
1384	Pseudomonas~phage~F8	Caudovirales	Myoviridae	Pbunavirus	178_0	Clustered	18	VC_178_0	18	0.8787	1.0	0.8787	1	1	1	1.0
1385	Pseudomonas~phage~H70	Caudovirales	Siphoviridae	Casadabanvirus	183_0	Clustered	19	VC_183_0	19	0.8434	1.0	0.8434	2	1	1	1.0
1386	Pseudomonas~phage~JBD18	Caudovirales	Siphoviridae	Beetrevirus	182_0	Clustered	5	VC_182_0	5	0.3078	0.99999992	0.3078	2	1	1	1.0
1387	Pseudomonas~phage~JBD24	Caudovirales	Siphoviridae	Casadabanvirus	183_0	Clustered	19	VC_183_0	19	0.8434	1.0	0.8434	2	1	1	1.0
1388	Pseudomonas~phage~JBD25	Caudovirales	Siphoviridae	Unassigned	182_0	Clustered	5	VC_182_0	5	0.3078	0.99999992	0.3078	2	1	1	1.0
1389	Pseudomonas~phage~JBD30	Caudovirales	Siphoviridae	Casadabanvirus	183_0	Clustered	19	VC_183_0	19	0.8434	1.0	0.8434	2	1	1	1.0
1390	Pseudomonas~phage~JBD44	Caudovirales	Siphoviridae	Unassigned	48_1	Clustered/Singleton	1	VC_48_1	1	0.0	1.0	0.0	1	1	1	1.0
1391	Pseudomonas~phage~JBD5	Caudovirales	Siphoviridae	Casadabanvirus	183_0	Clustered	19	VC_183_0	19	0.8434	1.0	0.8434	2	1	1	1.0
1392	Pseudomonas~phage~JBD67	Caudovirales	Siphoviridae	Beetrevirus	182_0	Clustered	5	VC_182_0	5	0.3078	0.99999992	0.3078	2	1	1	1.0
1393	Pseudomonas~phage~JBD69	Caudovirales	Siphoviridae	Casadabanvirus	183_0	Clustered	19	VC_183_0	19	0.8434	1.0	0.8434	2	1	1	1.0
1394	Pseudomonas~phage~JBD88a	Caudovirales	Siphoviridae	Casadabanvirus	183_0	Clustered	19	VC_183_0	19	0.8434	1.0	0.8434	2	1	1	1.0
1395	Pseudomonas~phage~JBD93	Caudovirales	Siphoviridae	Casadabanvirus	183_0	Clustered	19	VC_183_0	19	0.8434	1.0	0.8434	2	1	1	1.0
1396	Pseudomonas~phage~JD024	Caudovirales	Siphoviridae	Casadabanvirus	183_0	Clustered	19	VC_183_0	19	0.8434	1.0	0.8434	2	1	1	1.0
1397	Pseudomonas~phage~JG004	Caudovirales	Myoviridae	Pakpunavirus	51_0	Clustered	15	VC_51_0	15	0.6788	1.0	0.6788	1	1	1	1.0
1398	Pseudomonas~phage~JG024	Caudovirales	Myoviridae	Pbunavirus	178_0	Clustered	18	VC_178_0	18	0.8787	1.0	0.8787	1	1	1	1.0
1399	Pseudomonas~phage~K5	Caudovirales	Myoviridae	Pakpunavirus	51_0	Clustered	15	VC_51_0	15	0.6788	1.0	0.6788	1	1	1	1.0
1400	Pseudomonas~phage~K8	Caudovirales	Myoviridae	Pakpunavirus	51_0	Clustered	15	VC_51_0	15	0.6788	1.0	0.6788	1	1	1	1.0
1401	Pseudomonas~phage~KPP12	Caudovirales	Myoviridae	Pbunavirus	178_0	Clustered	18	VC_178_0	18	0.8787	1.0	0.8787	1	1	1	1.0
1402	Pseudomonas~phage~KPP21	Caudovirales	Podoviridae	Luz7virus	16_0	Clustered	2	VC_16_0	2	0.1076	0.95433753	0.1027	1	1	1	1.0
1403	Pseudomonas~phage~KPP25	Caudovirales	Podoviridae	Kpp25virus	319_0	Clustered	2	VC_319_0	2	1.0	1.0	1.0	1	1	1	1.0
1404	Pseudomonas~phage~LBL3	Caudovirales	Myoviridae	Pbunavirus	178_0	Clustered	18	VC_178_0	18	0.8787	1.0	0.8787	1	1	1	1.0
1405	Pseudomonas~phage~LIT1	Caudovirales	Podoviridae	Lit1virus	21_0	Clustered	9	VC_21_0	9	0.6196	1.0	0.6196	2	1	1	1.0
1406	Pseudomonas~phage~LKD16	Caudovirales	Podoviridae	Phikmvvirus	227_0	Clustered	11	VC_227_0	11	0.7129	1.0	0.7129	1	1	1	1.0
1407	Pseudomonas~phage~LKO4	Caudovirales	Siphoviridae	Yuavirus	10_0	Clustered	5	VC_10_0	5	0.5064	0.99999993	0.5064	1	1	1	1.0
1408	Pseudomonas~phage~LMA2	Caudovirales	Myoviridae	Pbunavirus	178_0	Clustered	18	VC_178_0	18	0.8787	1.0	0.8787	1	1	1	1.0
1409	Pseudomonas~phage~LUZ19	Caudovirales	Podoviridae	Phikmvvirus	227_0	Clustered	11	VC_227_0	11	0.7129	1.0	0.7129	1	1	1	1.0
1410	Pseudomonas~phage~LUZ7	Caudovirales	Podoviridae	Luz7virus	16_0	Clustered	2	VC_16_0	2	0.1076	0.95433753	0.1027	1	1	1	1.0
1411	Pseudomonas~phage~Lu11	Caudovirales	Myoviridae	Unassigned	320_0	Clustered	2	VC_320_0	2	0.7083	0.72985431	0.517	1	1	1	1.0
1412	Pseudomonas~phage~MD8	Caudovirales	Siphoviridae	Unassigned	240_0	Clustered	3	VC_240_0	3	0.7581	0.99542416	0.7546	1	1	1	1.0
1413	Pseudomonas~phage~MP1412	Caudovirales	Siphoviridae	Yuavirus	10_0	Clustered	5	VC_10_0	5	0.5064	0.99999993	0.5064	1	1	1	1.0
1414	Pseudomonas~phage~MP42	Caudovirales	Siphoviridae	Casadabanvirus	183_0	Clustered	19	VC_183_0	19	0.8434	1.0	0.8434	2	1	1	1.0
1415	Pseudomonas~phage~MP48	Caudovirales	Siphoviridae	Casadabanvirus	183_0	Clustered	19	VC_183_0	19	0.8434	1.0	0.8434	2	1	1	1.0
1416	Pseudomonas~phage~MPK6	Caudovirales	Podoviridae	Phikmvvirus	227_0	Clustered	11	VC_227_0	11	0.7129	1.0	0.7129	1	1	1	1.0
1417	Pseudomonas~phage~MPK7	Caudovirales	Podoviridae	Phikmvvirus	227_0	Clustered	11	VC_227_0	11	0.7129	1.0	0.7129	1	1	1	1.0
1418	Pseudomonas~phage~NH-4	Caudovirales	Myoviridae	Pbunavirus	178_0	Clustered	18	VC_178_0	18	0.8787	1.0	0.8787	1	1	1	1.0
1419	Pseudomonas~phage~NV1	Caudovirales	Podoviridae	Vicosavirus	208_0	Clustered	12	VC_208_0	12	0.9468	1.0	0.9468	5	1	1	1.0
1420	Pseudomonas~phage~Noxifer	Caudovirales	Myoviridae	Noxifervirus	225_2	Clustered/Singleton	1	VC_225_2	1	0.0	1.0	0.0	1	1	1	1.0
1421	Pseudomonas~phage~O4	Unassigned	Unassigned	Unassigned	195_0	Clustered	4	VC_195_0	4	0.6748	0.99995309	0.6747	1	3	2	1.0
1422	Pseudomonas~phage~OBP	Caudovirales	Myoviridae	Unassigned	226_1	Clustered	3	VC_226_1	3	0.1346	0.99601424	0.134	3	1	1	0.6667
1423	Pseudomonas~phage~PA10	Caudovirales	Myoviridae	Pakpunavirus	51_0	Clustered	15	VC_51_0	15	0.6788	1.0	0.6788	1	1	1	1.0
1424	Pseudomonas~phage~PA11	Caudovirales	Myoviridae	Unassigned	195_0	Clustered	4	VC_195_0	4	0.6748	0.99995309	0.6747	1	3	2	1.0
1425	Pseudomonas~phage~PA26	Caudovirales	Podoviridae	Lit1virus	21_0	Clustered	9	VC_21_0	9	0.6196	1.0	0.6196	2	1	1	1.0
1426	Pseudomonas~phage~PA5	Caudovirales	Myoviridae	Pbunavirus	178_0	Clustered	18	VC_178_0	18	0.8787	1.0	0.8787	1	1	1	1.0
1427	Pseudomonas~phage~PA7	Caudovirales	Myoviridae	Phikzvirus	225_0	Clustered	3	VC_225_0	3	0.1693	0.99828927	0.169	1	1	1	1.0
1428	Pseudomonas~phage~PAE1	Caudovirales	Siphoviridae	Yuavirus	10_0	Clustered	5	VC_10_0	5	0.5064	0.99999993	0.5064	1	1	1	1.0
1429	Pseudomonas~phage~PAJU2	Caudovirales	Siphoviridae	Unassigned	48_3	Clustered/Singleton	1	VC_48_3	1	0.0	1.0	0.0	1	1	1	1.0
1430	Pseudomonas~phage~PAK_P1	Caudovirales	Myoviridae	Pakpunavirus	51_0	Clustered	15	VC_51_0	15	0.6788	1.0	0.6788	1	1	1	1.0
1431	Pseudomonas~phage~PAK_P2	Caudovirales	Myoviridae	Pakpunavirus	51_0	Clustered	15	VC_51_0	15	0.6788	1.0	0.6788	1	1	1	1.0
1432	Pseudomonas~phage~PAK_P4	Caudovirales	Myoviridae	Pakpunavirus	51_0	Clustered	15	VC_51_0	15	0.6788	1.0	0.6788	1	1	1	1.0
1433	Pseudomonas~phage~PB1	Caudovirales	Myoviridae	Pbunavirus	178_0	Clustered	18	VC_178_0	18	0.8787	1.0	0.8787	1	1	1	1.0
1434	Pseudomonas~phage~PEV2	Caudovirales	Podoviridae	Lit1virus	21_0	Clustered	9	VC_21_0	9	0.6196	1.0	0.6196	2	1	1	1.0
1435	Pseudomonas~phage~PP7	Unassigned	Leviviridae	Unassigned	194_0	Clustered	2	VC_194_0	2	0.0769	0.0	0.0	1	1	1	1.0
1436	Pseudomonas~phage~PPPL-1	Caudovirales	Podoviridae	Teseptimavirus	206_0	Clustered	60	VC_206_0	60	0.9832	1.0	0.9832	4	1	1	1.0
1437	Pseudomonas~phage~PPpW-3	Caudovirales	Myoviridae	Jilinvirus	67_0	Clustered	5	VC_67_0	5	0.3462	0.99999995	0.3462	2	1	1	1.0
1438	Pseudomonas~phage~PPpW-4	Caudovirales	Podoviridae	Teseptimavirus	206_0	Clustered	60	VC_206_0	60	0.9832	1.0	0.9832	4	1	1	1.0
1439	Pseudomonas~phage~PRR1	Unassigned	Leviviridae	Levivirus	193_0	Clustered	4	VC_193_0	4	0.6383	0.99999712	0.6383	1	1	1	1.0
1440	Pseudomonas~phage~PT2	Caudovirales	Podoviridae	Phikmvvirus	227_0	Clustered	11	VC_227_0	11	0.7129	1.0	0.7129	1	1	1	1.0
1441	Pseudomonas~phage~Pa2	Caudovirales	Podoviridae	Litunavirus	21_0	Clustered	9	VC_21_0	9	0.6196	1.0	0.6196	2	1	1	1.0
1442	Pseudomonas~phage~PaBG	Caudovirales	Myoviridae	Unassigned	320_0	Clustered	2	VC_320_0	2	0.7083	0.72985431	0.517	1	1	1	1.0
1443	Pseudomonas~phage~PaMx42	Caudovirales	Siphoviridae	Septimatrevirus	9_0	Clustered	12	VC_9_0	12	0.6996	1.0	0.6996	4	1	1	1.0
1444	Pseudomonas~phage~PaP1	Caudovirales	Myoviridae	Pakpunavirus	51_0	Clustered	15	VC_51_0	15	0.6788	1.0	0.6788	1	1	1	1.0
1445	Pseudomonas~phage~PaP2	Caudovirales	Podoviridae	Unassigned	322_0	Clustered	2	VC_322_0	2	1.0	1.0	1.0	1	1	1	1.0
1446	Pseudomonas~phage~PaoP5	Caudovirales	Myoviridae	Pakpunavirus	51_0	Clustered	15	VC_51_0	15	0.6788	1.0	0.6788	1	1	1	1.0
1447	Pseudomonas~phage~Pf-10	Caudovirales	Podoviridae	Teseptimavirus	206_0	Clustered	60	VC_206_0	60	0.9832	1.0	0.9832	4	1	1	1.0
1448	Pseudomonas~phage~Phi-S1	Caudovirales	Podoviridae	Teseptimavirus	206_0	Clustered	60	VC_206_0	60	0.9832	1.0	0.9832	4	1	1	1.0
1449	Pseudomonas~phage~PhiCHU	Caudovirales	Podoviridae	Luz24virus	208_0	Clustered	12	VC_208_0	12	0.9468	1.0	0.9468	5	1	1	1.0
1450	Pseudomonas~phage~PhiPA3	Caudovirales	Myoviridae	Phikzvirus	225_1	Clustered	2	VC_225_1	2	0.0712	0.93563822	0.0666	1	1	1	0.0
1451	Pseudomonas~phage~PollyC	Caudovirales	Podoviridae	Pollyceevirus	72_0	Clustered	15	VC_72_0	15	0.7255	1.0	0.7255	6	1	1	1.0
1452	Pseudomonas~phage~SL2	Caudovirales	Myoviridae	Phikzvirus	225_0	Clustered	3	VC_225_0	3	0.1693	0.99828927	0.169	1	1	1	1.0
1453	Pseudomonas~phage~SN	Caudovirales	Myoviridae	Pbunavirus	178_0	Clustered	18	VC_178_0	18	0.8787	1.0	0.8787	1	1	1	1.0
1454	Pseudomonas~phage~TL	Caudovirales	Podoviridae	Luz24virus	208_0	Clustered	12	VC_208_0	12	0.9468	1.0	0.9468	5	1	1	1.0
1455	Pseudomonas~phage~UFV-P2	Caudovirales	Podoviridae	Vicosavirus	208_0	Clustered	12	VC_208_0	12	0.9468	1.0	0.9468	5	1	1	1.0
1456	Pseudomonas~phage~VCM	Caudovirales	Myoviridae	Otagovirus	53_1	Clustered	2	VC_53_1	2	0.0571	0.95309588	0.0544	1	1	1	1.0
1457	Pseudomonas~phage~VSW-3	Caudovirales	Podoviridae	Napahaivirus	72_0	Clustered	15	VC_72_0	15	0.7255	1.0	0.7255	6	1	1	1.0
1458	Pseudomonas~phage~YH30	Caudovirales	Podoviridae	Litunavirus	21_0	Clustered	9	VC_21_0	9	0.6196	1.0	0.6196	2	1	1	1.0
1459	Pseudomonas~phage~YH6	Caudovirales	Podoviridae	Litunavirus	21_0	Clustered	9	VC_21_0	9	0.6196	1.0	0.6196	2	1	1	1.0
1460	Pseudomonas~phage~YMC11/02/R656	Caudovirales	Siphoviridae	Unassigned	48_4	Clustered/Singleton	1	VC_48_4	1	0.0	1.0	0.0	1	1	1	1.0
1461	Pseudomonas~phage~YMC11/07/P54_PAE_BP	Caudovirales	Siphoviridae	Unassigned	48_0	Clustered	2	VC_48_0	2	0.2569	0.94713201	0.2433	1	1	1	1.0
1462	Pseudomonas~phage~Zigelbrucke	Caudovirales	Myoviridae	Pakpunavirus	51_0	Clustered	15	VC_51_0	15	0.6788	1.0	0.6788	1	1	1	1.0
1463	Pseudomonas~phage~nickie	Caudovirales	Siphoviridae	Nickievirus	241_0	Clustered	3	VC_241_0	3	0.9365	0.97408504	0.9123	1	1	1	1.0
1464	Pseudomonas~phage~phi12	Unassigned	Cystoviridae	Cystovirus	324_0	Clustered	2	VC_324_0	2	0.5548	0.72985431	0.4049	1	1	1	1.0
1465	Pseudomonas~phage~phi13	Unassigned	Cystoviridae	Cystovirus	323_0	Clustered	2	VC_323_0	2	0.533	0.89847992	0.4789	1	1	1	1.0
1466	Pseudomonas~phage~phi15	Caudovirales	Podoviridae	Teseptimavirus	206_0	Clustered	60	VC_206_0	60	0.9832	1.0	0.9832	4	1	1	1.0
1467	Pseudomonas~phage~phi2	Caudovirales	Siphoviridae	Unassigned	240_0	Clustered	3	VC_240_0	3	0.7581	0.99542416	0.7546	1	1	1	1.0
1468	Pseudomonas~phage~phi2954	Unassigned	Cystoviridae	Cystovirus	324_0	Clustered	2	VC_324_0	2	0.5548	0.72985431	0.4049	1	1	1	1.0
1469	Pseudomonas~phage~phi297	Caudovirales	Siphoviridae	Unassigned	48_0	Clustered	2	VC_48_0	2	0.2569	0.94713201	0.2433	1	1	1	1.0
1470	Pseudomonas~phage~phi3	Caudovirales	Myoviridae	Hpunavirus	76_0	Clustered	7	VC_76_0	7	0.558	1.0	0.558	2	1	1	1.0
1471	Pseudomonas~phage~phiIBB-PAA2	Caudovirales	Podoviridae	Luz24virus	208_0	Clustered	12	VC_208_0	12	0.9468	1.0	0.9468	5	1	1	1.0
1472	Pseudomonas~phage~phiIBB-PF7A	Caudovirales	Podoviridae	Teseptimavirus	206_0	Clustered	60	VC_206_0	60	0.9832	1.0	0.9832	4	1	1	1.0
1473	Pseudomonas~phage~phiKMV	Caudovirales	Podoviridae	Phikmvvirus	227_0	Clustered	11	VC_227_0	11	0.7129	1.0	0.7129	1	1	1	1.0
1474	Pseudomonas~phage~phiKTN6	Caudovirales	Myoviridae	Pbunavirus	178_0	Clustered	18	VC_178_0	18	0.8787	1.0	0.8787	1	1	1	1.0
1475	Pseudomonas~phage~phiMK	Caudovirales	Myoviridae	Pakpunavirus	51_0	Clustered	15	VC_51_0	15	0.6788	1.0	0.6788	1	1	1	1.0
1476	Pseudomonas~phage~phiNN	Unassigned	Cystoviridae	Cystovirus	325_0	Clustered	2	VC_325_0	2	0.653	0.86822376	0.5669	1	1	1	1.0
1477	Pseudomonas~phage~phiPMW	Caudovirales	Myoviridae	Plaisancevirus	55_0	Clustered/Singleton	1	VC_55_0	1	0.0	1.0	0.0	1	1	1	1.0
1478	Pseudomonas~phage~phiPSA2	Caudovirales	Podoviridae	Teseptimavirus	206_0	Clustered	60	VC_206_0	60	0.9832	1.0	0.9832	4	1	1	1.0
1479	Pseudomonas~phage~phiPsa374	Caudovirales	Myoviridae	Otagovirus	53_1	Clustered	2	VC_53_1	2	0.0571	0.95309588	0.0544	1	1	1	1.0
1480	Pseudomonas~phage~phiPto-bp6g	Caudovirales	Siphoviridae	Unassigned	55_1	Clustered/Singleton	1	VC_55_1	1	0.0	1.0	0.0	1	1	1	1.0
1481	Pseudomonas~phage~phiR18	Caudovirales	Podoviridae	Kpp25virus	319_0	Clustered	2	VC_319_0	2	1.0	1.0	1.0	1	1	1	1.0
1482	Pseudomonas~phage~phiYY	Unassigned	Cystoviridae	Cystovirus	323_0	Clustered	2	VC_323_0	2	0.533	0.89847992	0.4789	1	1	1	1.0
1483	Pseudomonas~phage~phikF77	Caudovirales	Podoviridae	Phikmvvirus	227_0	Clustered	11	VC_227_0	11	0.7129	1.0	0.7129	1	1	1	1.0
1484	Pseudomonas~phage~tf	Caudovirales	Podoviridae	Krylovvirus	208_0	Clustered	12	VC_208_0	12	0.9468	1.0	0.9468	5	1	1	1.0
1485	Pseudomonas~phage~vB_Pae-Kakheti25	Caudovirales	Siphoviridae	Septima3virus	9_0	Clustered	12	VC_9_0	12	0.6996	1.0	0.6996	4	1	1	1.0
1486	Pseudomonas~phage~vB_Pae-TbilisiM32	Caudovirales	Podoviridae	Phikmvvirus	227_0	Clustered	11	VC_227_0	11	0.7129	1.0	0.7129	1	1	1	1.0
1487	Pseudomonas~phage~vB_PaeM_C2-10_Ab02	Caudovirales	Myoviridae	Pakpunavirus	51_0	Clustered	15	VC_51_0	15	0.6788	1.0	0.6788	1	1	1	1.0
1488	Pseudomonas~phage~vB_PaeM_C2-10_Ab1	Caudovirales	Myoviridae	Pakpunavirus	51_0	Clustered	15	VC_51_0	15	0.6788	1.0	0.6788	1	1	1	1.0
1489	Pseudomonas~phage~vB_PaeM_CEB_DP1	Caudovirales	Myoviridae	Pbunavirus	178_0	Clustered	18	VC_178_0	18	0.8787	1.0	0.8787	1	1	1	1.0
1490	Pseudomonas~phage~vB_PaeM_E215	Caudovirales	Myoviridae	Pbunavirus	178_0	Clustered	18	VC_178_0	18	0.8787	1.0	0.8787	1	1	1	1.0
1491	Pseudomonas~phage~vB_PaeM_E217	Caudovirales	Myoviridae	Pbunavirus	178_0	Clustered	18	VC_178_0	18	0.8787	1.0	0.8787	1	1	1	1.0
1492	Pseudomonas~phage~vB_PaeM_MAG1	Caudovirales	Myoviridae	Pakpunavirus	51_0	Clustered	15	VC_51_0	15	0.6788	1.0	0.6788	1	1	1	1.0
1493	Pseudomonas~phage~vB_PaeM_PAO1_Ab27	Caudovirales	Myoviridae	Pbunavirus	178_0	Clustered	18	VC_178_0	18	0.8787	1.0	0.8787	1	1	1	1.0
1494	Pseudomonas~phage~vB_PaeP_C2-10_Ab09	Caudovirales	Podoviridae	Lit1virus	21_0	Clustered	9	VC_21_0	9	0.6196	1.0	0.6196	2	1	1	1.0
1495	Pseudomonas~phage~vB_PaeP_C2-10_Ab22	Caudovirales	Podoviridae	Luz24virus	208_0	Clustered	12	VC_208_0	12	0.9468	1.0	0.9468	5	1	1	1.0
1496	Pseudomonas~phage~vB_PaeP_MAG4	Caudovirales	Podoviridae	Litunavirus	21_0	Clustered	9	VC_21_0	9	0.6196	1.0	0.6196	2	1	1	1.0
1497	Pseudomonas~phage~vB_PaeP_PAO1_Ab05	Caudovirales	Podoviridae	Phikmvvirus	227_0	Clustered	11	VC_227_0	11	0.7129	1.0	0.7129	1	1	1	1.0
1498	Pseudomonas~phage~vB_PaeP_PPA-ABTNL	Caudovirales	Podoviridae	Phikmvvirus	227_0	Clustered	11	VC_227_0	11	0.7129	1.0	0.7129	1	1	1	1.0
1499	Pseudomonas~phage~vB_PaeP_p2-10_Or1	Caudovirales	Podoviridae	Bruynoghevirus	208_0	Clustered	12	VC_208_0	12	0.9468	1.0	0.9468	5	1	1	1.0
1500	Pseudomonas~phage~vB_PaeS_PAO1_Ab30	Caudovirales	Siphoviridae	Casadabanvirus	183_0	Clustered	19	VC_183_0	19	0.8434	1.0	0.8434	2	1	1	1.0
1501	Pseudomonas~phage~vB_PaeS_PM105	Caudovirales	Siphoviridae	Beetrevirus	182_0	Clustered	5	VC_182_0	5	0.3078	0.99999992	0.3078	2	1	1	1.0
1502	Pseudomonas~phage~vB_PaeS_SCH_Ab26	Caudovirales	Siphoviridae	Septima3virus	9_0	Clustered	12	VC_9_0	12	0.6996	1.0	0.6996	4	1	1	1.0
1503	Pseudomonas~phage~vB_Pae_PS44	Caudovirales	Myoviridae	Pbunavirus	178_0	Clustered	18	VC_178_0	18	0.8787	1.0	0.8787	1	1	1	1.0
1504	Pseudomonas~phage~vB_PsyM_KIL1	Caudovirales	Myoviridae	Flaumdravirus	53_0	Clustered	2	VC_53_0	2	0.0718	0.9529028	0.0684	1	1	1	1.0
1505	Pseudomonas~phage~vB_PsyM_KIL4	Caudovirales	Myoviridae	Flaumdravirus	53_0	Clustered	2	VC_53_0	2	0.0718	0.9529028	0.0684	1	1	1	1.0
1506	Pseudomonas~virus~119X	Caudovirales	Podoviridae	Unassigned	322_0	Clustered	2	VC_322_0	2	1.0	1.0	1.0	1	1	1	1.0
1507	Pseudomonas~virus~D3	Caudovirales	Siphoviridae	D3virus	48_2	Clustered	2	VC_48_2	2	0.2627	0.94988795	0.2496	1	1	1	1.0
1508	Pseudomonas~virus~D3112	Caudovirales	Siphoviridae	D3112virus	183_0	Clustered	19	VC_183_0	19	0.8434	1.0	0.8434	2	1	1	1.0
1509	Pseudomonas~virus~DMS3	Caudovirales	Siphoviridae	D3112virus	183_0	Clustered	19	VC_183_0	19	0.8434	1.0	0.8434	2	1	1	1.0
1510	Pseudomonas~virus~FHA0480	Caudovirales	Siphoviridae	D3112virus	183_0	Clustered	19	VC_183_0	19	0.8434	1.0	0.8434	2	1	1	1.0
1511	Pseudomonas~virus~LPB1	Caudovirales	Siphoviridae	D3112virus	183_0	Clustered	19	VC_183_0	19	0.8434	1.0	0.8434	2	1	1	1.0
1512	Pseudomonas~virus~LUZ24	Caudovirales	Podoviridae	Luz24virus	208_0	Clustered	12	VC_208_0	12	0.9468	1.0	0.9468	5	1	1	1.0
1513	Pseudomonas~virus~M6	Caudovirales	Siphoviridae	Yuavirus	10_0	Clustered	5	VC_10_0	5	0.5064	0.99999993	0.5064	1	1	1	1.0
1514	Pseudomonas~virus~MP22	Caudovirales	Siphoviridae	D3112virus	183_0	Clustered	19	VC_183_0	19	0.8434	1.0	0.8434	2	1	1	1.0
1515	Pseudomonas~virus~MP29	Caudovirales	Siphoviridae	D3112virus	183_0	Clustered	19	VC_183_0	19	0.8434	1.0	0.8434	2	1	1	1.0
1516	Pseudomonas~virus~MP38	Caudovirales	Siphoviridae	D3112virus	183_0	Clustered	19	VC_183_0	19	0.8434	1.0	0.8434	2	1	1	1.0
1517	Pseudomonas~virus~PA1KOR	Caudovirales	Siphoviridae	D3112virus	183_0	Clustered	19	VC_183_0	19	0.8434	1.0	0.8434	2	1	1	1.0
1518	Pseudomonas~virus~PMG1	Caudovirales	Siphoviridae	D3virus	48_2	Clustered	2	VC_48_2	2	0.2627	0.94988795	0.2496	1	1	1	1.0
1519	Pseudomonas~virus~PaP3	Caudovirales	Podoviridae	Luz24virus	208_0	Clustered	12	VC_208_0	12	0.9468	1.0	0.9468	5	1	1	1.0
1520	Pseudomonas~virus~Yua	Caudovirales	Siphoviridae	Yuavirus	10_0	Clustered	5	VC_10_0	5	0.5064	0.99999993	0.5064	1	1	1	1.0
1521	Pseudomonas~virus~phi6	Unassigned	Cystoviridae	Cystovirus	325_0	Clustered	2	VC_325_0	2	0.653	0.86822376	0.5669	1	1	1	1.0
1522	Pseudomonas~virus~phiCTX	Caudovirales	Myoviridae	P2virus	75_0	Clustered	29	VC_75_0	29	0.8383	1.0	0.8383	2	1	1	1.0
1523	Pseudomonas~virus~phiKZ	Caudovirales	Myoviridae	Phikzvirus	225_0	Clustered	3	VC_225_0	3	0.1693	0.99828927	0.169	1	1	1	1.0
1524	Puniceispirillum~phage~HMO-2011	Caudovirales	Podoviridae	Unassigned	197_0	Clustered	2	VC_197_0	2	0.7153	0.5	0.3576	1	1	1	1.0
1525	Pyrobaculum~spherical~virus	Unassigned	Globuloviridae	Globulovirus	326_0	Clustered	2	VC_326_0	2	1.0	1.0	1.0	1	1	1	1.0
1526	Ralstonia~phage~PE226	Unassigned	Inoviridae	Unassigned	329_0	Clustered	2	VC_329_0	2	0.5679	0.82711071	0.4698	1	1	1	1.0
1527	Ralstonia~phage~RS603	Unassigned	Inoviridae	Habenivirus	327_0	Clustered	3	VC_327_0	3	0.935	0.9595722	0.8972	1	1	1	1.0
1528	Ralstonia~phage~RSB1	Caudovirales	Podoviridae	Unassigned	72_0	Clustered	15	VC_72_0	15	0.7255	1.0	0.7255	6	1	1	1.0
1529	Ralstonia~phage~RSB2	Caudovirales	Podoviridae	Teseptimavirus	206_0	Clustered	60	VC_206_0	60	0.9832	1.0	0.9832	4	1	1	1.0
1530	Ralstonia~phage~RSJ2	Caudovirales	Podoviridae	Unassigned	72_0	Clustered	15	VC_72_0	15	0.7255	1.0	0.7255	6	1	1	1.0
1531	Ralstonia~phage~RSJ5	Caudovirales	Podoviridae	Unassigned	72_0	Clustered	15	VC_72_0	15	0.7255	1.0	0.7255	6	1	1	1.0
1532	Ralstonia~phage~RSM1	Unassigned	Inoviridae	Habenivirus	327_0	Clustered	3	VC_327_0	3	0.935	0.9595722	0.8972	1	1	1	1.0
1533	Ralstonia~phage~RSM3	Unassigned	Inoviridae	Habenivirus	327_0	Clustered	3	VC_327_0	3	0.935	0.9595722	0.8972	1	1	1	1.0
1534	Ralstonia~phage~RSS0	Unassigned	Inoviridae	Unassigned	328_0	Clustered	3	VC_328_0	3	0.8493	0.975127	0.8282	1	1	1	1.0
1535	Ralstonia~phage~RSS1	Unassigned	Inoviridae	Unassigned	328_0	Clustered	3	VC_328_0	3	0.8493	0.975127	0.8282	1	1	1	1.0
1536	Ralstonia~phage~RSS20	Unassigned	Inoviridae	Unassigned	328_0	Clustered	3	VC_328_0	3	0.8493	0.975127	0.8282	1	1	1	1.0
1537	Ralstonia~phage~RSY1	Caudovirales	Myoviridae	Peduovirus	75_0	Clustered	29	VC_75_0	29	0.8383	1.0	0.8383	2	1	1	1.0
1538	Ralstonia~phage~p12J	Unassigned	Inoviridae	Unassigned	329_0	Clustered	2	VC_329_0	2	0.5679	0.82711071	0.4698	1	1	1	1.0
1539	Ralstonia~virus~RSA1	Caudovirales	Myoviridae	P2virus	75_0	Clustered	29	VC_75_0	29	0.8383	1.0	0.8383	2	1	1	1.0
1540	Rhizobium~phage~16-3	Caudovirales	Siphoviridae	Unassigned	170_0	Clustered	2	VC_170_0	2	0.7422	0.81445332	0.6045	1	1	1	1.0
1541	Rhizobium~phage~RHEph04	Caudovirales	Myoviridae	Rheph4virus	49_0	Clustered	2	VC_49_0	2	0.4495	0.95227493	0.428	2	1	1	1.0
1542	Rhizobium~phage~RHEph06	Caudovirales	Myoviridae	Kleczkowskavirus	49_0	Clustered	2	VC_49_0	2	0.4495	0.95227493	0.428	2	1	1	1.0
1543	Rhizobium~phage~RHEph10	Caudovirales	Siphoviridae	Nickievirus	241_0	Clustered	3	VC_241_0	3	0.9365	0.97408504	0.9123	1	1	1	1.0
1544	Rhizobium~phage~RR1-A	Caudovirales	Myoviridae	Unassigned	107_0	Clustered	2	VC_107_0	2	0.5889	0.81445332	0.4797	1	1	1	1.0
1545	Rhizobium~phage~vB_RglS_P106B	Caudovirales	Siphoviridae	Rigallicvirus	77_0	Clustered	3	VC_77_0	3	0.1935	0.98740228	0.191	2	3	2	1.0
1546	Rhizobium~phage~vB_RleM_P10VF	Caudovirales	Myoviridae	Unassigned	34_0	Clustered	2	VC_34_0	2	0.24	0.95574307	0.2293	1	1	1	1.0
1547	Rhizobium~phage~vB_RleM_PPF1	Caudovirales	Myoviridae	Unassigned	107_0	Clustered	2	VC_107_0	2	0.5889	0.81445332	0.4797	1	1	1	1.0
1548	Rhizobium~phage~vB_RleS_L338C	Caudovirales	Siphoviridae	Unassigned	318_0	Clustered	3	VC_318_0	3	0.4147	0.98631307	0.4091	2	1	1	0.6667
1549	Rhodobacter~phage~RC1	Caudovirales	Siphoviridae	Unassigned	184_0	Clustered	2	VC_184_0	2	0.484	0.94557905	0.4576	1	1	1	1.0
1550	Rhodobacter~phage~RcCronus	Caudovirales	Siphoviridae	Cronusvirus	330_0	Clustered	2	VC_330_0	2	0.97	0.85557782	0.8299	1	1	1	1.0
1551	Rhodobacter~phage~RcRhea	Caudovirales	Siphoviridae	Cronusvirus	330_0	Clustered	2	VC_330_0	2	0.97	0.85557782	0.8299	1	1	1	1.0
1552	Rhodobacter~phage~RcSpartan	Caudovirales	Siphoviridae	Titanvirus	9_0	Clustered	12	VC_9_0	12	0.6996	1.0	0.6996	4	1	1	1.0
1553	Rhodobacter~phage~RcTitan	Caudovirales	Siphoviridae	Titanvirus	9_0	Clustered	12	VC_9_0	12	0.6996	1.0	0.6996	4	1	1	1.0
1554	Rhodococcus~phage~CosmicSans	Caudovirales	Siphoviridae	Rerduovirus	277_0	Clustered	3	VC_277_0	3	0.0827	0.99851667	0.0826	3	1	1	1.0
1555	Rhodococcus~phage~REQ3	Caudovirales	Siphoviridae	Unassigned	258_0	Clustered	3	VC_258_0	3	0.2724	0.8261431	0.225	1	1	1	1.0
1556	Rhodococcus~phage~RER2	Caudovirales	Siphoviridae	Rer2virus	277_0	Clustered	3	VC_277_0	3	0.0827	0.99851667	0.0826	3	1	1	1.0
1557	Rhodococcus~phage~RRH1	Caudovirales	Siphoviridae	Unassigned	104_0	Clustered	4	VC_104_0	4	0.7904	0.99289298	0.7848	1	1	1	1.0
1558	Rhodococcus~phage~Trina	Caudovirales	Siphoviridae	Trinavirus	331_0	Clustered	2	VC_331_0	2	0.113	0.93376822	0.1056	2	1	1	1.0
1559	Rhodococcus~phage~Weasels2	Caudovirales	Siphoviridae	Weaselvirus	331_0	Clustered	2	VC_331_0	2	0.113	0.93376822	0.1056	2	1	1	1.0
1560	Rhodococcus~virus~RGL3	Caudovirales	Siphoviridae	Unassigned	277_0	Clustered	3	VC_277_0	3	0.0827	0.99851667	0.0826	3	1	1	1.0
1561	Rhodovulum~phage~RS1	Caudovirales	Siphoviridae	Unassigned	184_0	Clustered	2	VC_184_0	2	0.484	0.94557905	0.4576	1	1	1	1.0
1562	Roseobacter~phage~RDJL~Phi~1	Caudovirales	Siphoviridae	Rdjlvirus	13_0	Clustered	2	VC_13_0	2	0.5237	0.944686	0.4947	1	1	1	1.0
1563	Roseobacter~phage~RDJL~Phi~2	Caudovirales	Siphoviridae	Rdjlvirus	13_0	Clustered	2	VC_13_0	2	0.5237	0.944686	0.4947	1	1	1	1.0
1564	Roseobacter~virus~SIO1	Caudovirales	Podoviridae	Unassigned	196_0	Clustered	2	VC_196_0	2	0.4534	0.93555746	0.4242	1	1	1	1.0
1565	Salicola~phage~CGphi29	Unassigned	Unassigned	Unassigned	77_0	Clustered	3	VC_77_0	3	0.1935	0.98740228	0.191	2	3	2	1.0
1566	Salinivibrio~phage~CW02	Caudovirales	Podoviridae	Unassigned	195_0	Clustered	4	VC_195_0	4	0.6748	0.99995309	0.6747	1	3	2	1.0
1567	Salmonella~phage~100268_sal2	Caudovirales	Siphoviridae	T5virus	252_0	Clustered	14	VC_252_0	14	0.6406	1.0	0.6406	2	1	1	1.0
1568	Salmonella~phage~103203_sal5	Caudovirales	Podoviridae	Lederbergvirus	157_0	Clustered	16	VC_157_0	16	0.5224	1.0	0.5224	2	1	1	0.8833
1569	Salmonella~phage~118970_sal1	Caudovirales	Siphoviridae	Chivirus	22_0	Clustered	11	VC_22_0	11	0.7938	1.0	0.7938	1	1	1	1.0
1570	Salmonella~phage~118970_sal2	Caudovirales	Siphoviridae	T5virus	252_0	Clustered	14	VC_252_0	14	0.6406	1.0	0.6406	2	1	1	1.0
1571	Salmonella~phage~118970_sal3	Caudovirales	Myoviridae	Unassigned	159_0	Clustered	6	VC_159_0	6	0.6222	1.0	0.6222	1	1	1	1.0
1572	Salmonella~phage~118970_sal4	Caudovirales	Podoviridae	Lederbergvirus	157_0	Clustered	16	VC_157_0	16	0.5224	1.0	0.5224	2	1	1	0.8833
1573	Salmonella~phage~36	Caudovirales	Siphoviridae	Tlsvirus	69_0	Clustered	32	VC_69_0	32	0.9801	1.0	0.9801	10	1	1	0.9435
1574	Salmonella~phage~37	Caudovirales	Siphoviridae	Chivirus	22_0	Clustered	11	VC_22_0	11	0.7938	1.0	0.7938	1	1	1	1.0
1575	Salmonella~phage~38	Caudovirales	Ackermannviridae	Cba120virus	33_1	Clustered	21	VC_33_1	21	0.8138	1.0	0.8138	5	1	1	0.819
1576	Salmonella~phage~64795_sal3	Caudovirales	Siphoviridae	Roufvirus	66_0	Clustered	5	VC_66_0	5	0.664	0.99999991	0.664	2	1	1	1.0
1577	Salmonella~phage~7-11	Caudovirales	Podoviridae	Unassigned	230_0	Clustered	2	VC_230_0	2	0.1614	0.95213171	0.1536	1	1	1	1.0
1578	Salmonella~phage~9NA	Caudovirales	Podoviridae	Nonanavirus	238_0	Clustered	3	VC_238_0	3	0.9366	0.99373207	0.9307	1	2	1	1.0
1579	Salmonella~phage~BP12A	Caudovirales	Podoviridae	Teseptimavirus	206_0	Clustered	60	VC_206_0	60	0.9832	1.0	0.9832	4	1	1	1.0
1580	Salmonella~phage~BP12B	Caudovirales	Podoviridae	Zindervirus	245_0	Clustered	15	VC_245_0	15	1.0	1.0	1.0	2	1	1	1.0
1581	Salmonella~phage~BP12C	Caudovirales	Siphoviridae	Chivirus	22_0	Clustered	11	VC_22_0	11	0.7938	1.0	0.7938	1	1	1	1.0
1582	Salmonella~phage~BPS11Q3	Caudovirales	Siphoviridae	Jerseyvirus	56_0	Clustered	23	VC_56_0	23	0.8413	1.0	0.8413	5	1	1	1.0
1583	Salmonella~phage~BPS15Q2	Caudovirales	Myoviridae	Felixounavirus	23_0	Clustered	25	VC_23_0	25	0.905	1.0	0.905	5	1	1	0.9967
1584	Salmonella~phage~BPS17L1	Caudovirales	Myoviridae	Felixounavirus	23_0	Clustered	25	VC_23_0	25	0.905	1.0	0.905	5	1	1	0.9967
1585	Salmonella~phage~BPS17W1	Caudovirales	Myoviridae	Felixounavirus	23_0	Clustered	25	VC_23_0	25	0.905	1.0	0.905	5	1	1	0.9967
1586	Salmonella~phage~Det7	Caudovirales	Ackermannviridae	Cba120virus	33_1	Clustered	21	VC_33_1	21	0.8138	1.0	0.8138	5	1	1	0.819
1587	Salmonella~phage~Ent1	Caudovirales	Siphoviridae	Jerseyvirus	56_0	Clustered	23	VC_56_0	23	0.8413	1.0	0.8413	5	1	1	1.0
1588	Salmonella~phage~FSL~SP-004	Caudovirales	Myoviridae	Peduovirus	75_0	Clustered	29	VC_75_0	29	0.8383	1.0	0.8383	2	1	1	1.0
1589	Salmonella~phage~FSL~SP-031	Caudovirales	Siphoviridae	Sp31virus	56_0	Clustered	23	VC_56_0	23	0.8413	1.0	0.8413	5	1	1	1.0
1590	Salmonella~phage~FSL~SP-058	Caudovirales	Podoviridae	Sp58virus	19_0	Clustered	4	VC_19_0	4	0.1841	0.99998272	0.1841	2	1	1	1.0
1591	Salmonella~phage~FSL~SP-076	Caudovirales	Podoviridae	Sp58virus	19_0	Clustered	4	VC_19_0	4	0.1841	0.99998272	0.1841	2	1	1	1.0
1592	Salmonella~phage~FSL~SP-101	Caudovirales	Siphoviridae	Jerseyvirus	56_0	Clustered	23	VC_56_0	23	0.8413	1.0	0.8413	5	1	1	1.0
1593	Salmonella~phage~FelixO1	Caudovirales	Myoviridae	Felixo1virus	23_0	Clustered	25	VC_23_0	25	0.905	1.0	0.905	5	1	1	0.9967
1594	Salmonella~phage~GG32	Caudovirales	Ackermannviridae	Cba120virus	33_1	Clustered	21	VC_33_1	21	0.8138	1.0	0.8138	5	1	1	0.819
1595	Salmonella~phage~IME207	Caudovirales	Siphoviridae	Roufvirus	66_0	Clustered	5	VC_66_0	5	0.664	0.99999991	0.664	2	1	1	1.0
1596	Salmonella~phage~Jersey	Caudovirales	Siphoviridae	Jerseyvirus	56_0	Clustered	23	VC_56_0	23	0.8413	1.0	0.8413	5	1	1	1.0
1597	Salmonella~phage~LSPA1	Caudovirales	Siphoviridae	Jerseyvirus	56_0	Clustered	23	VC_56_0	23	0.8413	1.0	0.8413	5	1	1	1.0
1598	Salmonella~phage~MA12	Caudovirales	Siphoviridae	Jerseyvirus	56_0	Clustered	23	VC_56_0	23	0.8413	1.0	0.8413	5	1	1	1.0
1599	Salmonella~phage~Marshall	Caudovirales	Ackermannviridae	Vi1virus	33_1	Clustered	21	VC_33_1	21	0.8138	1.0	0.8138	5	1	1	0.819
1600	Salmonella~phage~Maynard	Caudovirales	Ackermannviridae	Vi1virus	33_1	Clustered	21	VC_33_1	21	0.8138	1.0	0.8138	5	1	1	0.819
1601	Salmonella~phage~Melville	Caudovirales	Myoviridae	Gelderlandvirus	41_6	Clustered	5	VC_41_6	5	0.0431	0.99999992	0.0431	2	1	1	1.0
1602	Salmonella~phage~Mushroom	Caudovirales	Myoviridae	Felixo1virus	23_0	Clustered	25	VC_23_0	25	0.905	1.0	0.905	5	1	1	0.9967
1603	Salmonella~phage~NR01	Caudovirales	Siphoviridae	Tequintavirus	252_0	Clustered	14	VC_252_0	14	0.6406	1.0	0.6406	2	1	1	1.0
1604	Salmonella~phage~RE-2010	Caudovirales	Myoviridae	Peduovirus	75_0	Clustered	29	VC_75_0	29	0.8383	1.0	0.8383	2	1	1	1.0
1605	Salmonella~phage~SE2	Caudovirales	Siphoviridae	Jerseyvirus	56_0	Clustered	23	VC_56_0	23	0.8413	1.0	0.8413	5	1	1	1.0
1606	Salmonella~phage~SEN1	Caudovirales	Myoviridae	Peduovirus	75_0	Clustered	29	VC_75_0	29	0.8383	1.0	0.8383	2	1	1	1.0
1607	Salmonella~phage~SEN22	Caudovirales	Podoviridae	Lederbergvirus	157_0	Clustered	16	VC_157_0	16	0.5224	1.0	0.5224	2	1	1	0.8833
1608	Salmonella~phage~SEN4	Caudovirales	Myoviridae	Peduovirus	75_0	Clustered	29	VC_75_0	29	0.8383	1.0	0.8383	2	1	1	1.0
1609	Salmonella~phage~SEN5	Caudovirales	Myoviridae	Peduovirus	75_0	Clustered	29	VC_75_0	29	0.8383	1.0	0.8383	2	1	1	1.0
1610	Salmonella~phage~SETP13	Caudovirales	Siphoviridae	Jerseyvirus	56_0	Clustered	23	VC_56_0	23	0.8413	1.0	0.8413	5	1	1	1.0
1611	Salmonella~phage~SETP3	Caudovirales	Siphoviridae	Jerseyvirus	56_0	Clustered	23	VC_56_0	23	0.8413	1.0	0.8413	5	1	1	1.0
1612	Salmonella~phage~SETP7	Caudovirales	Siphoviridae	Jerseyvirus	56_0	Clustered	23	VC_56_0	23	0.8413	1.0	0.8413	5	1	1	1.0
1613	Salmonella~phage~SFP10	Caudovirales	Ackermannviridae	Cba120virus	33_1	Clustered	21	VC_33_1	21	0.8138	1.0	0.8138	5	1	1	0.819
1614	Salmonella~phage~SJ46	Caudovirales	Myoviridae	Punavirus	251_0	Clustered	3	VC_251_0	3	0.9918	0.975127	0.9671	2	1	1	1.0
1615	Salmonella~phage~SKML-39	Caudovirales	Ackermannviridae	Ag3virus	33_1	Clustered	21	VC_33_1	21	0.8138	1.0	0.8138	5	1	1	0.819
1616	Salmonella~phage~SP069	Caudovirales	Podoviridae	Nonanavirus	238_0	Clustered	3	VC_238_0	3	0.9366	0.99373207	0.9307	1	2	1	1.0
1617	Salmonella~phage~SPN1S	Caudovirales	Podoviridae	Epsilon15virus	155_0	Clustered	5	VC_155_0	5	0.6913	0.99999946	0.6913	2	1	1	1.0
1618	Salmonella~phage~SPN3US	Caudovirales	Myoviridae	Spn3virus	224_1	Clustered	3	VC_224_1	3	0.1031	0.99307831	0.1024	2	1	1	1.0
1619	Salmonella~phage~SPN9CC	Caudovirales	Podoviridae	Lederbergvirus	157_0	Clustered	16	VC_157_0	16	0.5224	1.0	0.5224	2	1	1	0.8833
1620	Salmonella~phage~SS3e	Caudovirales	Siphoviridae	Jerseyvirus	56_0	Clustered	23	VC_56_0	23	0.8413	1.0	0.8413	5	1	1	1.0
1621	Salmonella~phage~SSU5	Caudovirales	Siphoviridae	Nickievirus	241_0	Clustered	3	VC_241_0	3	0.9365	0.97408504	0.9123	1	1	1	1.0
1622	Salmonella~phage~ST160	Caudovirales	Podoviridae	Lederbergvirus	157_0	Clustered	16	VC_157_0	16	0.5224	1.0	0.5224	2	1	1	0.8833
1623	Salmonella~phage~ST64B	Caudovirales	Myoviridae	Unassigned	159_0	Clustered	6	VC_159_0	6	0.6222	1.0	0.6222	1	1	1	1.0
1624	Salmonella~phage~STML-13-1	Caudovirales	Ackermannviridae	Vi1virus	33_1	Clustered	21	VC_33_1	21	0.8138	1.0	0.8138	5	1	1	0.819
1625	Salmonella~phage~STML-198	Caudovirales	Myoviridae	S16virus	41_6	Clustered	5	VC_41_6	5	0.0431	0.99999992	0.0431	2	1	1	1.0
1626	Salmonella~phage~STP4-a	Caudovirales	Myoviridae	Gelderlandvirus	41_6	Clustered	5	VC_41_6	5	0.0431	0.99999992	0.0431	2	1	1	1.0
1627	Salmonella~phage~Sh19	Caudovirales	Ackermannviridae	Cba120virus	33_1	Clustered	21	VC_33_1	21	0.8138	1.0	0.8138	5	1	1	0.819
1628	Salmonella~phage~Shivani	Caudovirales	Siphoviridae	T5virus	252_0	Clustered	14	VC_252_0	14	0.6406	1.0	0.6406	2	1	1	1.0
1629	Salmonella~phage~Si3	Caudovirales	Myoviridae	Felixounavirus	23_0	Clustered	25	VC_23_0	25	0.905	1.0	0.905	5	1	1	0.9967
1630	Salmonella~phage~Vi~II-E1	Caudovirales	Siphoviridae	Roufvirus	66_0	Clustered	5	VC_66_0	5	0.664	0.99999991	0.664	2	1	1	1.0
1631	Salmonella~phage~Vi06	Caudovirales	Podoviridae	Teseptimavirus	206_0	Clustered	60	VC_206_0	60	0.9832	1.0	0.9832	4	1	1	1.0
1632	Salmonella~phage~epsilon15	Caudovirales	Podoviridae	Epsilon15virus	155_0	Clustered	5	VC_155_0	5	0.6913	0.99999946	0.6913	2	1	1	1.0
1633	Salmonella~phage~epsilon34	Caudovirales	Podoviridae	Lederbergvirus	157_0	Clustered	16	VC_157_0	16	0.5224	1.0	0.5224	2	1	1	0.8833
1634	Salmonella~phage~f18SE	Caudovirales	Siphoviridae	Jerseyvirus	56_0	Clustered	23	VC_56_0	23	0.8413	1.0	0.8413	5	1	1	1.0
1635	Salmonella~phage~g341c	Caudovirales	Podoviridae	Lederbergvirus	157_0	Clustered	16	VC_157_0	16	0.5224	1.0	0.5224	2	1	1	0.8833
1636	Salmonella~phage~phSE-2	Caudovirales	Siphoviridae	Tlsvirus	69_0	Clustered	32	VC_69_0	32	0.9801	1.0	0.9801	10	1	1	0.9435
1637	Salmonella~phage~phiSG-JL2	Caudovirales	Podoviridae	Teseptimavirus	206_0	Clustered	60	VC_206_0	60	0.9832	1.0	0.9832	4	1	1	1.0
1638	Salmonella~phage~vB_SPuM_SP116	Caudovirales	Myoviridae	Felixounavirus	23_0	Clustered	25	VC_23_0	25	0.905	1.0	0.905	5	1	1	0.9967
1639	Salmonella~phage~vB_SalM_PM10	Caudovirales	Ackermannviridae	Cba120virus	33_1	Clustered	21	VC_33_1	21	0.8138	1.0	0.8138	5	1	1	0.819
1640	Salmonella~phage~vB_SalM_SJ2	Caudovirales	Ackermannviridae	Vi1virus	33_1	Clustered	21	VC_33_1	21	0.8138	1.0	0.8138	5	1	1	0.819
1641	Salmonella~phage~vB_SalM_SJ3	Caudovirales	Ackermannviridae	Cba120virus	33_1	Clustered	21	VC_33_1	21	0.8138	1.0	0.8138	5	1	1	0.819
1642	Salmonella~phage~vB_SemP_Emek	Caudovirales	Podoviridae	Lederbergvirus	157_0	Clustered	16	VC_157_0	16	0.5224	1.0	0.5224	2	1	1	0.8833
1643	Salmonella~phage~vB_SenMS16	Caudovirales	Myoviridae	S16virus	41_6	Clustered	5	VC_41_6	5	0.0431	0.99999992	0.0431	2	1	1	1.0
1644	Salmonella~phage~vB_SenS-Ent2	Caudovirales	Siphoviridae	Jerseyvirus	56_0	Clustered	23	VC_56_0	23	0.8413	1.0	0.8413	5	1	1	1.0
1645	Salmonella~phage~vB_SenS-Ent3	Caudovirales	Siphoviridae	Jerseyvirus	56_0	Clustered	23	VC_56_0	23	0.8413	1.0	0.8413	5	1	1	1.0
1646	Salmonella~phage~vB_SenS_AG11	Caudovirales	Siphoviridae	Jerseyvirus	56_0	Clustered	23	VC_56_0	23	0.8413	1.0	0.8413	5	1	1	1.0
1647	Salmonella~phage~vB_SnwM_CGG4-1	Caudovirales	Myoviridae	Gelderlandvirus	41_6	Clustered	5	VC_41_6	5	0.0431	0.99999992	0.0431	2	1	1	1.0
1648	Salmonella~phage~wksl3	Caudovirales	Siphoviridae	Jerseyvirus	56_0	Clustered	23	VC_56_0	23	0.8413	1.0	0.8413	5	1	1	1.0
1649	Salmonella~virus~Chi	Caudovirales	Siphoviridae	Chivirus	22_0	Clustered	11	VC_22_0	11	0.7938	1.0	0.7938	1	1	1	1.0
1650	Salmonella~virus~FSLSP030	Caudovirales	Siphoviridae	Chivirus	22_0	Clustered	11	VC_22_0	11	0.7938	1.0	0.7938	1	1	1	1.0
1651	Salmonella~virus~FSLSP088	Caudovirales	Siphoviridae	Chivirus	22_0	Clustered	11	VC_22_0	11	0.7938	1.0	0.7938	1	1	1	1.0
1652	Salmonella~virus~Fels2	Caudovirales	Myoviridae	P2virus	75_0	Clustered	29	VC_75_0	29	0.8383	1.0	0.8383	2	1	1	1.0
1653	Salmonella~virus~HK620	Caudovirales	Podoviridae	P22virus	157_0	Clustered	16	VC_157_0	16	0.5224	1.0	0.5224	2	1	1	0.8833
1654	Salmonella~virus~P22	Caudovirales	Podoviridae	P22virus	157_0	Clustered	16	VC_157_0	16	0.5224	1.0	0.5224	2	1	1	0.8833
1655	Salmonella~virus~PsP3	Caudovirales	Myoviridae	P2virus	75_0	Clustered	29	VC_75_0	29	0.8383	1.0	0.8383	2	1	1	1.0
1656	Salmonella~virus~SP126	Caudovirales	Siphoviridae	Tlsvirus	69_0	Clustered	32	VC_69_0	32	0.9801	1.0	0.9801	10	1	1	0.9435
1657	Salmonella~virus~SP6	Caudovirales	Podoviridae	Sp6virus	245_0	Clustered	15	VC_245_0	15	1.0	1.0	1.0	2	1	1	1.0
1658	Salmonella~virus~SPC35	Caudovirales	Siphoviridae	T5virus	252_0	Clustered	14	VC_252_0	14	0.6406	1.0	0.6406	2	1	1	1.0
1659	Salmonella~virus~SPN19	Caudovirales	Siphoviridae	Chivirus	22_0	Clustered	11	VC_22_0	11	0.7938	1.0	0.7938	1	1	1	1.0
1660	Salmonella~virus~ST64T	Caudovirales	Podoviridae	P22virus	157_0	Clustered	16	VC_157_0	16	0.5224	1.0	0.5224	2	1	1	0.8833
1661	Salmonella~virus~Stitch	Caudovirales	Siphoviridae	T5virus	252_0	Clustered	14	VC_252_0	14	0.6406	1.0	0.6406	2	1	1	1.0
1662	Salmonella~virus~ViI	Caudovirales	Ackermannviridae	Vi1virus	33_1	Clustered	21	VC_33_1	21	0.8138	1.0	0.8138	5	1	1	0.819
1663	Salmonella~virus~iEPS5	Caudovirales	Siphoviridae	Chivirus	22_0	Clustered	11	VC_22_0	11	0.7938	1.0	0.7938	1	1	1	1.0
1664	Serratia~phage~BF	Caudovirales	Myoviridae	Eneladusvirus	78_0	Clustered/Singleton	1	VC_78_0	1	0.0	1.0	0.0	1	1	1	1.0
1665	Serratia~phage~CHI14	Caudovirales	Myoviridae	Winklervirus	41_4	Clustered/Singleton	1	VC_41_4	1	0.0	1.0	0.0	1	1	1	1.0
1666	Serratia~phage~phiMAM1	Caudovirales	Ackermannviridae	Unassigned	33_0	Clustered	2	VC_33_0	2	0.0236	0.87357713	0.0206	1	1	1	1.0
1667	Serratia~phage~vB_Sru_IME250	Caudovirales	Ackermannviridae	Unassigned	33_1	Clustered	21	VC_33_1	21	0.8138	1.0	0.8138	5	1	1	0.819
1668	Shewanella~phage~Spp001	Caudovirales	Myoviridae	Unassigned	64_0	Clustered	5	VC_64_0	5	1.0	1.0	1.0	1	1	1	1.0
1669	Shewanella~sp.~phage~1/4	Caudovirales	Myoviridae	Unassigned	210_0	Clustered	2	VC_210_0	2	0.4038	0.9503436	0.3838	1	1	1	1.0
1670	Shewanella~sp.~phage~1/40	Caudovirales	Myoviridae	Unassigned	210_0	Clustered	2	VC_210_0	2	0.4038	0.9503436	0.3838	1	1	1	1.0
1671	Shewanella~sp.~phage~1/41	Caudovirales	Myoviridae	Unassigned	179_0	Clustered	2	VC_179_0	2	0.0435	0.9517076	0.0414	1	1	1	1.0
1672	Shewanella~sp.~phage~1/44	Caudovirales	Siphoviridae	Unassigned	321_0	Clustered	2	VC_321_0	2	0.8579	0.5	0.429	1	1	1	1.0
1673	Shigella~phage~75/02~Stx	Caudovirales	Podoviridae	Pocjvirus	187_1	Clustered	14	VC_187_1	14	0.5783	1.0	0.5783	5	1	1	0.8901
1674	Shigella~phage~Ag3	Caudovirales	Ackermannviridae	Ag3virus	33_1	Clustered	21	VC_33_1	21	0.8138	1.0	0.8138	5	1	1	0.819
1675	Shigella~phage~EP23	Caudovirales	Siphoviridae	Hk578virus	229_0	Clustered	10	VC_229_0	10	0.662	1.0	0.662	2	1	1	1.0
1676	Shigella~phage~POCJ13	Caudovirales	Podoviridae	Pocjvirus	187_1	Clustered	14	VC_187_1	14	0.5783	1.0	0.5783	5	1	1	0.8901
1677	Shigella~phage~SHBML-50-1	Caudovirales	Myoviridae	Tequatrovirus	41_5	Clustered	32	VC_41_5	32	0.3565	1.0	0.3565	2	1	1	0.996
1678	Shigella~phage~SHFML-11	Caudovirales	Myoviridae	Tequatrovirus	41_5	Clustered	32	VC_41_5	32	0.3565	1.0	0.3565	2	1	1	0.996
1679	Shigella~phage~SHFML-26	Caudovirales	Myoviridae	Tequatrovirus	41_5	Clustered	32	VC_41_5	32	0.3565	1.0	0.3565	2	1	1	0.996
1680	Shigella~phage~SHSML-45	Caudovirales	Siphoviridae	Tequintavirus	252_0	Clustered	14	VC_252_0	14	0.6406	1.0	0.6406	2	1	1	1.0
1681	Shigella~phage~SHSML-52-1	Caudovirales	Myoviridae	Mosigvirus	41_0	Clustered	9	VC_41_0	9	0.0691	1.0	0.0691	2	1	1	1.0
1682	Shigella~phage~SP18	Caudovirales	Myoviridae	Sp18virus	41_12	Clustered	5	VC_41_12	5	0.0407	0.99999977	0.0407	1	1	1	1.0
1683	Shigella~phage~Sf13	Caudovirales	Myoviridae	Mooglevirus	23_0	Clustered	25	VC_23_0	25	0.905	1.0	0.905	5	1	1	0.9967
1684	Shigella~phage~Sf14	Caudovirales	Myoviridae	Mooglevirus	23_0	Clustered	25	VC_23_0	25	0.905	1.0	0.905	5	1	1	0.9967
1685	Shigella~phage~Sf17	Caudovirales	Myoviridae	Mooglevirus	23_0	Clustered	25	VC_23_0	25	0.905	1.0	0.905	5	1	1	0.9967
1686	Shigella~phage~Sf21	Caudovirales	Myoviridae	Tequatrovirus	41_5	Clustered	32	VC_41_5	32	0.3565	1.0	0.3565	2	1	1	0.996
1687	Shigella~phage~Sf22	Caudovirales	Myoviridae	Tequatrovirus	41_5	Clustered	32	VC_41_5	32	0.3565	1.0	0.3565	2	1	1	0.996
1688	Shigella~phage~Sf24	Caudovirales	Myoviridae	Tequatrovirus	41_5	Clustered	32	VC_41_5	32	0.3565	1.0	0.3565	2	1	1	0.996
1689	Shigella~phage~SfII	Caudovirales	Myoviridae	Unassigned	159_0	Clustered	6	VC_159_0	6	0.6222	1.0	0.6222	1	1	1	1.0
1690	Shigella~phage~SfIV	Caudovirales	Myoviridae	Unassigned	159_0	Clustered	6	VC_159_0	6	0.6222	1.0	0.6222	1	1	1	1.0
1691	Shigella~phage~SfMu	Caudovirales	Myoviridae	Muvirus	181_0	Clustered	3	VC_181_0	3	0.5536	0.99823291	0.5526	1	1	1	1.0
1692	Shigella~phage~Shf125875	Caudovirales	Myoviridae	Rb69virus	41_0	Clustered	9	VC_41_0	9	0.0691	1.0	0.0691	2	1	1	1.0
1693	Shigella~phage~Shfl2	Caudovirales	Myoviridae	T4virus	41_5	Clustered	32	VC_41_5	32	0.3565	1.0	0.3565	2	1	1	0.996
1694	Shigella~phage~Ss-VASD	Caudovirales	Podoviridae	Tl2011virus	187_1	Clustered	14	VC_187_1	14	0.5783	1.0	0.5783	5	1	1	0.8901
1695	Shigella~phage~pSb-1	Caudovirales	Podoviridae	G7cvirus	15_1	Clustered	11	VC_15_1	11	0.4766	1.0	0.4766	3	1	1	0.9818
1696	Shigella~phage~pSf-1	Caudovirales	Siphoviridae	Hanrivervirus	69_0	Clustered	32	VC_69_0	32	0.9801	1.0	0.9801	10	1	1	0.9435
1697	Shigella~phage~pSf-2	Caudovirales	Siphoviridae	T1virus	69_0	Clustered	32	VC_69_0	32	0.9801	1.0	0.9801	10	1	1	0.9435
1698	Shigella~phage~pSs-1	Caudovirales	Myoviridae	T4virus	41_5	Clustered	32	VC_41_5	32	0.3565	1.0	0.3565	2	1	1	0.996
1699	Shigella~phage~vB_SsoS-ISF002	Caudovirales	Siphoviridae	Tunavirus	69_0	Clustered	32	VC_69_0	32	0.9801	1.0	0.9801	10	1	1	0.9435
1700	Shigella~virus~Sf6	Caudovirales	Podoviridae	P22virus	157_0	Clustered	16	VC_157_0	16	0.5224	1.0	0.5224	2	1	1	0.8833
1701	Shigella~virus~Shfl1	Caudovirales	Siphoviridae	T1virus	69_0	Clustered	32	VC_69_0	32	0.9801	1.0	0.9801	10	1	1	0.9435
1702	Silicibacter~phage~DSS3phi2	Caudovirales	Podoviridae	Baltimorevirus	18_0	Clustered	4	VC_18_0	4	0.1924	0.99998272	0.1923	2	1	1	1.0
1703	Sinorhizobium~phage~phiM12	Caudovirales	Myoviridae	M12virus	31_0	Clustered	3	VC_31_0	3	0.2005	0.99847453	0.2002	1	1	1	1.0
1704	Sinorhizobium~phage~phiM7	Caudovirales	Myoviridae	M12virus	31_0	Clustered	3	VC_31_0	3	0.2005	0.99847453	0.2002	1	1	1	1.0
1705	Sinorhizobium~phage~phiM9	Caudovirales	Myoviridae	Unassigned	34_0	Clustered	2	VC_34_0	2	0.24	0.95574307	0.2293	1	1	1	1.0
1706	Sinorhizobium~phage~phiN3	Caudovirales	Myoviridae	M12virus	31_0	Clustered	3	VC_31_0	3	0.2005	0.99847453	0.2002	1	1	1	1.0
1707	Sodalis~phage~SO1	Caudovirales	Siphoviridae	Hk578virus	229_0	Clustered	10	VC_229_0	10	0.662	1.0	0.662	2	1	1	1.0
1708	Spiroplasma~phage~1-C74	Unassigned	Inoviridae	Vespertiliovirus	333_0	Clustered	3	VC_333_0	3	1.0	1.0	1.0	1	1	1	1.0
1709	Spiroplasma~phage~1-R8A2B	Unassigned	Inoviridae	Vespertiliovirus	333_0	Clustered	3	VC_333_0	3	1.0	1.0	1.0	1	1	1	1.0
1710	Spiroplasma~virus~SkV1CR23x	Unassigned	Inoviridae	Vespertiliovirus	333_0	Clustered	3	VC_333_0	3	1.0	1.0	1.0	1	1	1	1.0
1711	Staphylococcus~phage~23MRA	Caudovirales	Siphoviridae	Biseptimavirus	5_0	Clustered	14	VC_5_0	14	0.323	1.0	0.323	2	1	1	0.8022
1712	Staphylococcus~phage~3MRA	Caudovirales	Siphoviridae	Phietavirus	142_0	Clustered	37	VC_142_0	37	0.6256	1.0	0.6256	1	1	1	0.7643
1713	Staphylococcus~phage~66	Caudovirales	Podoviridae	Rosenblumvirus	249_0	Clustered	8	VC_249_0	8	0.831	1.0	0.831	2	1	1	1.0
1714	Staphylococcus~phage~6ec	Caudovirales	Siphoviridae	Sextaecvirus	154_0	Clustered	2	VC_154_0	2	0.3771	0.95458485	0.36	1	1	1	1.0
1715	Staphylococcus~phage~812	Caudovirales	Herelleviridae	Kayvirus	126_0	Clustered	13	VC_126_0	13	0.4672	1.0	0.4672	1	2	1	1.0
1716	Staphylococcus~phage~B166	Caudovirales	Siphoviridae	Phietavirus	142_0	Clustered	37	VC_142_0	37	0.6256	1.0	0.6256	1	1	1	0.7643
1717	Staphylococcus~phage~B236	Caudovirales	Siphoviridae	Phietavirus	142_0	Clustered	37	VC_142_0	37	0.6256	1.0	0.6256	1	1	1	0.7643
1718	Staphylococcus~phage~BP39	Caudovirales	Podoviridae	Rosenblumvirus	249_0	Clustered	8	VC_249_0	8	0.831	1.0	0.831	2	1	1	1.0
1719	Staphylococcus~phage~DW2	Caudovirales	Siphoviridae	Phietavirus	142_0	Clustered	37	VC_142_0	37	0.6256	1.0	0.6256	1	1	1	0.7643
1720	Staphylococcus~phage~GH15	Caudovirales	Myoviridae	Kayvirus	126_0	Clustered	13	VC_126_0	13	0.4672	1.0	0.4672	1	2	1	1.0
1721	Staphylococcus~phage~GRCS	Caudovirales	Podoviridae	Rosenblumvirus	249_0	Clustered	8	VC_249_0	8	0.831	1.0	0.831	2	1	1	1.0
1722	Staphylococcus~phage~IME-SA4	Caudovirales	Siphoviridae	Biseptimavirus	144_0	Clustered	4	VC_144_0	4	0.0812	0.99994564	0.0812	2	1	1	0.8333
1723	Staphylococcus~phage~JD007	Caudovirales	Myoviridae	Kayvirus	126_0	Clustered	13	VC_126_0	13	0.4672	1.0	0.4672	1	2	1	1.0
1724	Staphylococcus~phage~JS01	Caudovirales	Siphoviridae	Biseptimavirus	5_0	Clustered	14	VC_5_0	14	0.323	1.0	0.323	2	1	1	0.8022
1725	Staphylococcus~phage~MCE-2014	Caudovirales	Myoviridae	Kayvirus	126_0	Clustered	13	VC_126_0	13	0.4672	1.0	0.4672	1	2	1	1.0
1726	Staphylococcus~phage~P108	Caudovirales	Myoviridae	Kayvirus	126_0	Clustered	13	VC_126_0	13	0.4672	1.0	0.4672	1	2	1	1.0
1727	Staphylococcus~phage~P68	Caudovirales	Podoviridae	Rosenblumvirus	249_0	Clustered	8	VC_249_0	8	0.831	1.0	0.831	2	1	1	1.0
1728	Staphylococcus~phage~PVL	Caudovirales	Siphoviridae	Biseptimavirus	5_0	Clustered	14	VC_5_0	14	0.323	1.0	0.323	2	1	1	0.8022
1729	Staphylococcus~phage~ROSA	Caudovirales	Siphoviridae	Phietavirus	142_0	Clustered	37	VC_142_0	37	0.6256	1.0	0.6256	1	1	1	0.7643
1730	Staphylococcus~phage~S24-1	Caudovirales	Podoviridae	Rosenblumvirus	249_0	Clustered	8	VC_249_0	8	0.831	1.0	0.831	2	1	1	1.0
1731	Staphylococcus~phage~S25-3	Caudovirales	Myoviridae	Kayvirus	126_0	Clustered	13	VC_126_0	13	0.4672	1.0	0.4672	1	2	1	1.0
1732	Staphylococcus~phage~S25-4	Caudovirales	Myoviridae	Kayvirus	126_0	Clustered	13	VC_126_0	13	0.4672	1.0	0.4672	1	2	1	1.0
1733	Staphylococcus~phage~SA1	Caudovirales	Myoviridae	Unassigned	23_0	Clustered	25	VC_23_0	25	0.905	1.0	0.905	5	1	1	0.9967
1734	Staphylococcus~phage~SA12	Caudovirales	Siphoviridae	Phietavirus	142_0	Clustered	37	VC_142_0	37	0.6256	1.0	0.6256	1	1	1	0.7643
1735	Staphylococcus~phage~SA13	Caudovirales	Siphoviridae	Phietavirus	142_0	Clustered	37	VC_142_0	37	0.6256	1.0	0.6256	1	1	1	0.7643
1736	Staphylococcus~phage~SA97	Caudovirales	Siphoviridae	Phietavirus	142_0	Clustered	37	VC_142_0	37	0.6256	1.0	0.6256	1	1	1	0.7643
1737	Staphylococcus~phage~SAP-2	Caudovirales	Podoviridae	Rosenblumvirus	249_0	Clustered	8	VC_249_0	8	0.831	1.0	0.831	2	1	1	1.0
1738	Staphylococcus~phage~SLPW	Caudovirales	Podoviridae	Rosenblumvirus	249_0	Clustered	8	VC_249_0	8	0.831	1.0	0.831	2	1	1	1.0
1739	Staphylococcus~phage~SMSAP5	Caudovirales	Siphoviridae	Triavirus	6_0	Clustered	2	VC_6_0	2	0.0372	0.93800766	0.0349	1	1	1	1.0
1740	Staphylococcus~phage~SPbeta-like	Caudovirales	Siphoviridae	Spbetavirus	113_1	Clustered/Singleton	1	VC_113_1	1	0.0	1.0	0.0	1	1	1	1.0
1741	Staphylococcus~phage~Sb1	Caudovirales	Herelleviridae	Kayvirus	126_0	Clustered	13	VC_126_0	13	0.4672	1.0	0.4672	1	2	1	1.0
1742	Staphylococcus~phage~StB20	Caudovirales	Siphoviridae	Unassigned	144_0	Clustered	4	VC_144_0	4	0.0812	0.99994564	0.0812	2	1	1	0.8333
1743	Staphylococcus~phage~StB20-like	Caudovirales	Siphoviridae	Unassigned	144_0	Clustered	4	VC_144_0	4	0.0812	0.99994564	0.0812	2	1	1	0.8333
1744	Staphylococcus~phage~Stau2	Caudovirales	Myoviridae	Silviavirus	126_2	Clustered	4	VC_126_2	4	0.1052	0.9999831	0.1052	1	1	1	1.0
1745	Staphylococcus~phage~StauST398-1	Caudovirales	Siphoviridae	Phietavirus	142_0	Clustered	37	VC_142_0	37	0.6256	1.0	0.6256	1	1	1	0.7643
1746	Staphylococcus~phage~StauST398-3	Caudovirales	Siphoviridae	Phietavirus	142_0	Clustered	37	VC_142_0	37	0.6256	1.0	0.6256	1	1	1	0.7643
1747	Staphylococcus~phage~StauST398-4	Caudovirales	Siphoviridae	Biseptimavirus	5_0	Clustered	14	VC_5_0	14	0.323	1.0	0.323	2	1	1	0.8022
1748	Staphylococcus~phage~StauST398-5	Caudovirales	Siphoviridae	Phietavirus	142_0	Clustered	37	VC_142_0	37	0.6256	1.0	0.6256	1	1	1	0.7643
1749	Staphylococcus~phage~Team1	Caudovirales	Myoviridae	Kayvirus	126_0	Clustered	13	VC_126_0	13	0.4672	1.0	0.4672	1	2	1	1.0
1750	Staphylococcus~phage~phi5967PVL	Caudovirales	Siphoviridae	Biseptimavirus	5_0	Clustered	14	VC_5_0	14	0.323	1.0	0.323	2	1	1	0.8022
1751	Staphylococcus~phage~phi7401PVL	Caudovirales	Siphoviridae	Triavirus	6_0	Clustered	2	VC_6_0	2	0.0372	0.93800766	0.0349	1	1	1	1.0
1752	Staphylococcus~phage~phiBU01	Caudovirales	Siphoviridae	Biseptimavirus	5_0	Clustered	14	VC_5_0	14	0.323	1.0	0.323	2	1	1	0.8022
1753	Staphylococcus~phage~phiIBB-SEP1	Caudovirales	Myoviridae	Sep1virus	126_1	Clustered	2	VC_126_1	2	0.0319	0.95495584	0.0304	1	1	1	1.0
1754	Staphylococcus~phage~phiIPLA-C1C	Caudovirales	Myoviridae	Sep1virus	126_1	Clustered	2	VC_126_1	2	0.0319	0.95495584	0.0304	1	1	1	1.0
1755	Staphylococcus~phage~phiIPLA-RODI	Caudovirales	Myoviridae	Kayvirus	126_0	Clustered	13	VC_126_0	13	0.4672	1.0	0.4672	1	2	1	1.0
1756	Staphylococcus~phage~phiJB	Caudovirales	Siphoviridae	Phietavirus	142_0	Clustered	37	VC_142_0	37	0.6256	1.0	0.6256	1	1	1	0.7643
1757	Staphylococcus~phage~phiN315	Caudovirales	Siphoviridae	Unassigned	5_0	Clustered	14	VC_5_0	14	0.323	1.0	0.323	2	1	1	0.8022
1758	Staphylococcus~phage~phiNM3	Caudovirales	Siphoviridae	Biseptimavirus	5_0	Clustered	14	VC_5_0	14	0.323	1.0	0.323	2	1	1	0.8022
1759	Staphylococcus~phage~phiPVL-CN125	Caudovirales	Siphoviridae	Biseptimavirus	5_0	Clustered	14	VC_5_0	14	0.323	1.0	0.323	2	1	1	0.8022
1760	Staphylococcus~phage~phiRS7	Caudovirales	Siphoviridae	Biseptimavirus	144_0	Clustered	4	VC_144_0	4	0.0812	0.99994564	0.0812	2	1	1	0.8333
1761	Staphylococcus~phage~phiSA12	Caudovirales	Myoviridae	Kayvirus	126_0	Clustered	13	VC_126_0	13	0.4672	1.0	0.4672	1	2	1	1.0
1762	Staphylococcus~phage~tp310-1	Caudovirales	Siphoviridae	Biseptimavirus	5_0	Clustered	14	VC_5_0	14	0.323	1.0	0.323	2	1	1	0.8022
1763	Staphylococcus~phage~tp310-3	Caudovirales	Siphoviridae	Biseptimavirus	5_0	Clustered	14	VC_5_0	14	0.323	1.0	0.323	2	1	1	0.8022
1764	Staphylococcus~phage~vB_SauM_Remus	Caudovirales	Myoviridae	Silviavirus	126_2	Clustered	4	VC_126_2	4	0.1052	0.9999831	0.1052	1	1	1	1.0
1765	Staphylococcus~phage~vB_SauM_Romulus	Caudovirales	Myoviridae	Silviavirus	126_2	Clustered	4	VC_126_2	4	0.1052	0.9999831	0.1052	1	1	1	1.0
1766	Staphylococcus~phage~vB_SepS_SEP9	Caudovirales	Siphoviridae	Sextaecvirus	154_0	Clustered	2	VC_154_0	2	0.3771	0.95458485	0.36	1	1	1	1.0
1767	Staphylococcus~prophage~phiPV83	Caudovirales	Siphoviridae	Biseptimavirus	5_0	Clustered	14	VC_5_0	14	0.323	1.0	0.323	2	1	1	0.8022
1768	Staphylococcus~virus~108PVL	Caudovirales	Siphoviridae	Biseptimavirus	5_0	Clustered	14	VC_5_0	14	0.323	1.0	0.323	2	1	1	0.8022
1769	Staphylococcus~virus~11	Caudovirales	Siphoviridae	Phietavirus	142_0	Clustered	37	VC_142_0	37	0.6256	1.0	0.6256	1	1	1	0.7643
1770	Staphylococcus~virus~13	Caudovirales	Siphoviridae	Biseptimavirus	5_0	Clustered	14	VC_5_0	14	0.323	1.0	0.323	2	1	1	0.8022
1771	Staphylococcus~virus~187	Caudovirales	Siphoviridae	Phietavirus	142_0	Clustered	37	VC_142_0	37	0.6256	1.0	0.6256	1	1	1	0.7643
1772	Staphylococcus~virus~29	Caudovirales	Siphoviridae	Phietavirus	142_0	Clustered	37	VC_142_0	37	0.6256	1.0	0.6256	1	1	1	0.7643
1773	Staphylococcus~virus~44AHJD	Caudovirales	Podoviridae	P68virus	249_0	Clustered	8	VC_249_0	8	0.831	1.0	0.831	2	1	1	1.0
1774	Staphylococcus~virus~52a	Caudovirales	Siphoviridae	Phietavirus	142_0	Clustered	37	VC_142_0	37	0.6256	1.0	0.6256	1	1	1	0.7643
1775	Staphylococcus~virus~53	Caudovirales	Siphoviridae	Phietavirus	142_0	Clustered	37	VC_142_0	37	0.6256	1.0	0.6256	1	1	1	0.7643
1776	Staphylococcus~virus~55	Caudovirales	Siphoviridae	Phietavirus	142_0	Clustered	37	VC_142_0	37	0.6256	1.0	0.6256	1	1	1	0.7643
1777	Staphylococcus~virus~69	Caudovirales	Siphoviridae	Phietavirus	142_0	Clustered	37	VC_142_0	37	0.6256	1.0	0.6256	1	1	1	0.7643
1778	Staphylococcus~virus~71	Caudovirales	Siphoviridae	Phietavirus	142_0	Clustered	37	VC_142_0	37	0.6256	1.0	0.6256	1	1	1	0.7643
1779	Staphylococcus~virus~80	Caudovirales	Siphoviridae	Phietavirus	142_0	Clustered	37	VC_142_0	37	0.6256	1.0	0.6256	1	1	1	0.7643
1780	Staphylococcus~virus~80alpha	Caudovirales	Siphoviridae	Phietavirus	142_0	Clustered	37	VC_142_0	37	0.6256	1.0	0.6256	1	1	1	0.7643
1781	Staphylococcus~virus~85	Caudovirales	Siphoviridae	Phietavirus	142_0	Clustered	37	VC_142_0	37	0.6256	1.0	0.6256	1	1	1	0.7643
1782	Staphylococcus~virus~88	Caudovirales	Siphoviridae	Phietavirus	142_0	Clustered	37	VC_142_0	37	0.6256	1.0	0.6256	1	1	1	0.7643
1783	Staphylococcus~virus~92	Caudovirales	Siphoviridae	Phietavirus	142_0	Clustered	37	VC_142_0	37	0.6256	1.0	0.6256	1	1	1	0.7643
1784	Staphylococcus~virus~96	Caudovirales	Siphoviridae	Phietavirus	142_0	Clustered	37	VC_142_0	37	0.6256	1.0	0.6256	1	1	1	0.7643
1785	Staphylococcus~virus~G1	Caudovirales	Myoviridae	Kayvirus	126_0	Clustered	13	VC_126_0	13	0.4672	1.0	0.4672	1	2	1	1.0
1786	Staphylococcus~virus~IPLA88	Caudovirales	Siphoviridae	Phietavirus	142_0	Clustered	37	VC_142_0	37	0.6256	1.0	0.6256	1	1	1	0.7643
1787	Staphylococcus~virus~K	Caudovirales	Myoviridae	Kayvirus	126_0	Clustered	13	VC_126_0	13	0.4672	1.0	0.4672	1	2	1	1.0
1788	Staphylococcus~virus~SA11	Caudovirales	Myoviridae	Silviavirus	126_2	Clustered	4	VC_126_2	4	0.1052	0.9999831	0.1052	1	1	1	1.0
1789	Staphylococcus~virus~SAP26	Caudovirales	Siphoviridae	Phietavirus	142_0	Clustered	37	VC_142_0	37	0.6256	1.0	0.6256	1	1	1	0.7643
1790	Staphylococcus~virus~Twort	Caudovirales	Myoviridae	Twortvirus	126_3	Clustered/Singleton	1	VC_126_3	1	0.0	1.0	0.0	1	1	1	1.0
1791	Staphylococcus~virus~X2	Caudovirales	Siphoviridae	Phietavirus	142_0	Clustered	37	VC_142_0	37	0.6256	1.0	0.6256	1	1	1	0.7643
1792	Staphylococcus~virus~phiETA	Caudovirales	Siphoviridae	Phietavirus	142_0	Clustered	37	VC_142_0	37	0.6256	1.0	0.6256	1	1	1	0.7643
1793	Staphylococcus~virus~phiETA2	Caudovirales	Siphoviridae	Phietavirus	142_0	Clustered	37	VC_142_0	37	0.6256	1.0	0.6256	1	1	1	0.7643
1794	Staphylococcus~virus~phiETA3	Caudovirales	Siphoviridae	Phietavirus	142_0	Clustered	37	VC_142_0	37	0.6256	1.0	0.6256	1	1	1	0.7643
1795	Staphylococcus~virus~phiMR11	Caudovirales	Siphoviridae	Phietavirus	142_0	Clustered	37	VC_142_0	37	0.6256	1.0	0.6256	1	1	1	0.7643
1796	Staphylococcus~virus~phiMR25	Caudovirales	Siphoviridae	Phietavirus	142_0	Clustered	37	VC_142_0	37	0.6256	1.0	0.6256	1	1	1	0.7643
1797	Staphylococcus~virus~phiNM1	Caudovirales	Siphoviridae	Phietavirus	142_0	Clustered	37	VC_142_0	37	0.6256	1.0	0.6256	1	1	1	0.7643
1798	Staphylococcus~virus~phiNM2	Caudovirales	Siphoviridae	Phietavirus	142_0	Clustered	37	VC_142_0	37	0.6256	1.0	0.6256	1	1	1	0.7643
1799	Staphylococcus~virus~phiNM4	Caudovirales	Siphoviridae	Phietavirus	142_0	Clustered	37	VC_142_0	37	0.6256	1.0	0.6256	1	1	1	0.7643
1800	Stenotrophomonas~phage~IME13	Caudovirales	Myoviridae	Secunda5virus	42_2	Clustered/Singleton	1	VC_42_2	1	0.0	1.0	0.0	1	1	1	1.0
1801	Stenotrophomonas~phage~IME15	Caudovirales	Podoviridae	Teseptimavirus	206_0	Clustered	60	VC_206_0	60	0.9832	1.0	0.9832	4	1	1	1.0
1802	Stenotrophomonas~phage~PSH1	Unassigned	Inoviridae	Unassigned	334_0	Clustered	4	VC_334_0	4	0.8269	0.91009519	0.7526	1	1	1	1.0
1803	Stenotrophomonas~phage~S1	Caudovirales	Siphoviridae	Unassigned	321_0	Clustered	2	VC_321_0	2	0.8579	0.5	0.429	1	1	1	1.0
1804	Stenotrophomonas~phage~SMA7	Unassigned	Inoviridae	Unassigned	334_0	Clustered	4	VC_334_0	4	0.8269	0.91009519	0.7526	1	1	1	1.0
1805	Stenotrophomonas~phage~SMA9	Unassigned	Inoviridae	Unassigned	334_0	Clustered	4	VC_334_0	4	0.8269	0.91009519	0.7526	1	1	1	1.0
1806	Stenotrophomonas~phage~Smp131	Caudovirales	Myoviridae	Peduovirus	75_0	Clustered	29	VC_75_0	29	0.8383	1.0	0.8383	2	1	1	1.0
1807	Stenotrophomonas~phage~phiSHP2	Unassigned	Inoviridae	Unassigned	334_0	Clustered	4	VC_334_0	4	0.8269	0.91009519	0.7526	1	1	1	1.0
1808	Stenotrophomonas~phage~vB_SmaS-DLP_2	Caudovirales	Siphoviridae	Septimatrevirus	9_0	Clustered	12	VC_9_0	12	0.6996	1.0	0.6996	4	1	1	1.0
1809	Stenotrophomonas~phage~vB_SmaS_DLP_5	Caudovirales	Siphoviridae	Delepquintavirus	318_0	Clustered	3	VC_318_0	3	0.4147	0.98631307	0.4091	2	1	1	0.6667
1810	Streptococcus~phage~20617	Caudovirales	Siphoviridae	Brussowvirus	121_0	Clustered	8	VC_121_0	8	0.4358	1.0	0.4358	2	1	1	1.0
1811	Streptococcus~phage~315.1	Caudovirales	Siphoviridae	Unassigned	150_0	Clustered	2	VC_150_0	2	0.2011	0.95375059	0.1918	1	1	1	1.0
1812	Streptococcus~phage~315.3	Caudovirales	Siphoviridae	Unassigned	247_0	Clustered	3	VC_247_0	3	0.1193	0.99432311	0.1186	1	1	1	1.0
1813	Streptococcus~phage~315.6	Caudovirales	Siphoviridae	Unassigned	7_0	Clustered	2	VC_7_0	2	0.2414	0.95292685	0.2301	1	1	1	1.0
1814	Streptococcus~phage~A25	Caudovirales	Siphoviridae	Unassigned	122_0	Clustered	5	VC_122_0	5	0.3076	0.99999994	0.3076	1	1	1	1.0
1815	Streptococcus~phage~CP-7	Caudovirales	Podoviridae	Cp1virus	59_0	Clustered	2	VC_59_0	2	0.5596	0.94172064	0.527	1	1	1	1.0
1816	Streptococcus~phage~Cp-1	Caudovirales	Podoviridae	Cp1virus	59_0	Clustered	2	VC_59_0	2	0.5596	0.94172064	0.527	1	1	1	1.0
1817	Streptococcus~phage~DCC1738	Caudovirales	Siphoviridae	Unassigned	166_0	Clustered	11	VC_166_0	11	0.8248	1.0	0.8248	1	1	1	1.0
1818	Streptococcus~phage~Dp-1	Caudovirales	Siphoviridae	Unassigned	115_0	Clustered	3	VC_115_0	3	0.4652	0.99315978	0.4621	1	1	1	1.0
1819	Streptococcus~phage~IC1	Caudovirales	Siphoviridae	Unassigned	166_0	Clustered	11	VC_166_0	11	0.8248	1.0	0.8248	1	1	1	1.0
1820	Streptococcus~phage~K13	Caudovirales	Siphoviridae	Unassigned	166_0	Clustered	11	VC_166_0	11	0.8248	1.0	0.8248	1	1	1	1.0
1821	Streptococcus~phage~MM1	Caudovirales	Siphoviridae	Unassigned	122_0	Clustered	5	VC_122_0	5	0.3076	0.99999994	0.3076	1	1	1	1.0
1822	Streptococcus~phage~P9	Caudovirales	Siphoviridae	Unassigned	7_0	Clustered	2	VC_7_0	2	0.2414	0.95292685	0.2301	1	1	1	1.0
1823	Streptococcus~phage~PH10	Caudovirales	Siphoviridae	Unassigned	152_0	Clustered	4	VC_152_0	4	0.3455	0.99987076	0.3454	1	1	1	1.0
1824	Streptococcus~phage~SM1	Caudovirales	Siphoviridae	Unassigned	247_0	Clustered	3	VC_247_0	3	0.1193	0.99432311	0.1186	1	1	1	1.0
1825	Streptococcus~phage~SPQS1	Caudovirales	Siphoviridae	Sap6virus	139_0	Clustered	6	VC_139_0	6	0.8632	0.99999999	0.8632	2	1	1	1.0
1826	Streptococcus~phage~SpSL1	Caudovirales	Siphoviridae	Unassigned	152_0	Clustered	4	VC_152_0	4	0.3455	0.99987076	0.3454	1	1	1	1.0
1827	Streptococcus~phage~Str-PAP-1	Caudovirales	Siphoviridae	Unassigned	247_0	Clustered	3	VC_247_0	3	0.1193	0.99432311	0.1186	1	1	1	1.0
1828	Streptococcus~phage~TP-778L	Caudovirales	Siphoviridae	Brussowvirus	121_0	Clustered	8	VC_121_0	8	0.4358	1.0	0.4358	2	1	1	1.0
1829	Streptococcus~phage~TP-J34	Caudovirales	Siphoviridae	Brussowvirus	121_0	Clustered	8	VC_121_0	8	0.4358	1.0	0.4358	2	1	1	1.0
1830	Streptococcus~phage~phi3396	Caudovirales	Siphoviridae	Unassigned	150_0	Clustered	2	VC_150_0	2	0.2011	0.95375059	0.1918	1	1	1	1.0
1831	Streptococcus~phage~phiARI0004	Caudovirales	Siphoviridae	Unassigned	166_0	Clustered	11	VC_166_0	11	0.8248	1.0	0.8248	1	1	1	1.0
1832	Streptococcus~phage~phiARI0031	Caudovirales	Siphoviridae	Unassigned	166_0	Clustered	11	VC_166_0	11	0.8248	1.0	0.8248	1	1	1	1.0
1833	Streptococcus~phage~phiARI0131-1	Caudovirales	Siphoviridae	Unassigned	166_0	Clustered	11	VC_166_0	11	0.8248	1.0	0.8248	1	1	1	1.0
1834	Streptococcus~phage~phiARI0131-2	Caudovirales	Siphoviridae	Unassigned	152_0	Clustered	4	VC_152_0	4	0.3455	0.99987076	0.3454	1	1	1	1.0
1835	Streptococcus~phage~phiARI0460-1	Caudovirales	Siphoviridae	Unassigned	166_0	Clustered	11	VC_166_0	11	0.8248	1.0	0.8248	1	1	1	1.0
1836	Streptococcus~phage~phiARI0462	Caudovirales	Siphoviridae	Unassigned	166_0	Clustered	11	VC_166_0	11	0.8248	1.0	0.8248	1	1	1	1.0
1837	Streptococcus~phage~phiARI0468-1	Caudovirales	Siphoviridae	Unassigned	166_0	Clustered	11	VC_166_0	11	0.8248	1.0	0.8248	1	1	1	1.0
1838	Streptococcus~phage~phiARI0468-2	Caudovirales	Siphoviridae	Unassigned	166_0	Clustered	11	VC_166_0	11	0.8248	1.0	0.8248	1	1	1	1.0
1839	Streptococcus~phage~phiARI0468-4	Caudovirales	Siphoviridae	Unassigned	122_0	Clustered	5	VC_122_0	5	0.3076	0.99999994	0.3076	1	1	1	1.0
1840	Streptococcus~phage~phiARI0746	Caudovirales	Siphoviridae	Unassigned	166_0	Clustered	11	VC_166_0	11	0.8248	1.0	0.8248	1	1	1	1.0
1841	Streptococcus~phage~phiARI0923	Caudovirales	Siphoviridae	Unassigned	152_0	Clustered	4	VC_152_0	4	0.3455	0.99987076	0.3454	1	1	1	1.0
1842	Streptococcus~phage~phiBHN167	Caudovirales	Siphoviridae	Unassigned	122_0	Clustered	5	VC_122_0	5	0.3076	0.99999994	0.3076	1	1	1	1.0
1843	Streptococcus~phage~phiNJ2	Caudovirales	Siphoviridae	Unassigned	122_0	Clustered	5	VC_122_0	5	0.3076	0.99999994	0.3076	1	1	1	1.0
1844	Streptococcus~virus~2972	Caudovirales	Siphoviridae	Sfi11virus	121_0	Clustered	8	VC_121_0	8	0.4358	1.0	0.4358	2	1	1	1.0
1845	Streptococcus~virus~858	Caudovirales	Siphoviridae	Sfi11virus	121_0	Clustered	8	VC_121_0	8	0.4358	1.0	0.4358	2	1	1	1.0
1846	Streptococcus~virus~ALQ132	Caudovirales	Siphoviridae	Sfi11virus	121_0	Clustered	8	VC_121_0	8	0.4358	1.0	0.4358	2	1	1	1.0
1847	Streptococcus~virus~O1205	Caudovirales	Siphoviridae	Sfi11virus	121_0	Clustered	8	VC_121_0	8	0.4358	1.0	0.4358	2	1	1	1.0
1848	Streptococcus~virus~Sfi11	Caudovirales	Siphoviridae	Sfi11virus	121_0	Clustered	8	VC_121_0	8	0.4358	1.0	0.4358	2	1	1	1.0
1849	Streptomyces~phage~Aaronocolus	Caudovirales	Siphoviridae	Likavirus	335_0	Clustered	15	VC_335_0	15	0.9982	1.0	0.9982	4	1	1	1.0
1850	Streptomyces~phage~Amela	Caudovirales	Siphoviridae	Camvirus	335_0	Clustered	15	VC_335_0	15	0.9982	1.0	0.9982	4	1	1	1.0
1851	Streptomyces~phage~Bing	Caudovirales	Siphoviridae	Bingvirus	103_0	Clustered	4	VC_103_0	4	0.3425	0.99995717	0.3425	3	1	1	1.0
1852	Streptomyces~phage~Caliburn	Caudovirales	Siphoviridae	Likavirus	335_0	Clustered	15	VC_335_0	15	0.9982	1.0	0.9982	4	1	1	1.0
1853	Streptomyces~phage~Danzina	Caudovirales	Siphoviridae	Likavirus	335_0	Clustered	15	VC_335_0	15	0.9982	1.0	0.9982	4	1	1	1.0
1854	Streptomyces~phage~DrGrey	Caudovirales	Siphoviridae	Rimavirus	103_0	Clustered	4	VC_103_0	4	0.3425	0.99995717	0.3425	3	1	1	1.0
1855	Streptomyces~phage~Hydra	Caudovirales	Siphoviridae	Likavirus	335_0	Clustered	15	VC_335_0	15	0.9982	1.0	0.9982	4	1	1	1.0
1856	Streptomyces~phage~Izzy	Caudovirales	Siphoviridae	Likavirus	335_0	Clustered	15	VC_335_0	15	0.9982	1.0	0.9982	4	1	1	1.0
1857	Streptomyces~phage~Jay2Jay	Caudovirales	Siphoviridae	Samistivirus	332_0	Clustered	6	VC_332_0	6	0.7648	0.99999984	0.7648	1	1	1	1.0
1858	Streptomyces~phage~Lannister	Caudovirales	Siphoviridae	Likavirus	335_0	Clustered	15	VC_335_0	15	0.9982	1.0	0.9982	4	1	1	1.0
1859	Streptomyces~phage~Lika	Caudovirales	Siphoviridae	Likavirus	335_0	Clustered	15	VC_335_0	15	0.9982	1.0	0.9982	4	1	1	1.0
1860	Streptomyces~phage~Mildred21	Caudovirales	Siphoviridae	Samistivirus	332_0	Clustered	6	VC_332_0	6	0.7648	0.99999984	0.7648	1	1	1	1.0
1861	Streptomyces~phage~Nanodon	Caudovirales	Siphoviridae	Likavirus	335_0	Clustered	15	VC_335_0	15	0.9982	1.0	0.9982	4	1	1	1.0
1862	Streptomyces~phage~NootNoot	Caudovirales	Siphoviridae	Samistivirus	332_0	Clustered	6	VC_332_0	6	0.7648	0.99999984	0.7648	1	1	1	1.0
1863	Streptomyces~phage~Paradiddles	Caudovirales	Siphoviridae	Samistivirus	332_0	Clustered	6	VC_332_0	6	0.7648	0.99999984	0.7648	1	1	1	1.0
1864	Streptomyces~phage~Peebs	Caudovirales	Siphoviridae	Samistivirus	332_0	Clustered	6	VC_332_0	6	0.7648	0.99999984	0.7648	1	1	1	1.0
1865	Streptomyces~phage~R4	Caudovirales	Siphoviridae	R4virus	335_0	Clustered	15	VC_335_0	15	0.9982	1.0	0.9982	4	1	1	1.0
1866	Streptomyces~phage~Rima	Caudovirales	Siphoviridae	Rimavirus	103_0	Clustered	4	VC_103_0	4	0.3425	0.99995717	0.3425	3	1	1	1.0
1867	Streptomyces~phage~SF1	Caudovirales	Siphoviridae	Unassigned	336_0	Clustered	3	VC_336_0	3	0.9168	0.92554266	0.8485	1	1	1	1.0
1868	Streptomyces~phage~SF3	Caudovirales	Siphoviridae	Unassigned	336_0	Clustered	3	VC_336_0	3	0.9168	0.92554266	0.8485	1	1	1	1.0
1869	Streptomyces~phage~SV1	Caudovirales	Siphoviridae	Unassigned	258_0	Clustered	3	VC_258_0	3	0.2724	0.8261431	0.225	1	1	1	1.0
1870	Streptomyces~phage~Samisti12	Caudovirales	Siphoviridae	Samistivirus	332_0	Clustered	6	VC_332_0	6	0.7648	0.99999984	0.7648	1	1	1	1.0
1871	Streptomyces~phage~Scap1	Caudovirales	Siphoviridae	Scapunavirus	103_0	Clustered	4	VC_103_0	4	0.3425	0.99995717	0.3425	3	1	1	1.0
1872	Streptomyces~phage~Sujidade	Caudovirales	Siphoviridae	Likavirus	335_0	Clustered	15	VC_335_0	15	0.9982	1.0	0.9982	4	1	1	1.0
1873	Streptomyces~phage~TP1604	Caudovirales	Siphoviridae	Ydn12virus	337_0	Clustered	3	VC_337_0	3	1.0	1.0	1.0	2	1	1	1.0
1874	Streptomyces~phage~VWB	Caudovirales	Siphoviridae	Unassigned	336_0	Clustered	3	VC_336_0	3	0.9168	0.92554266	0.8485	1	1	1	1.0
1875	Streptomyces~phage~YDN12	Caudovirales	Siphoviridae	Ydn12virus	337_0	Clustered	3	VC_337_0	3	1.0	1.0	1.0	2	1	1	1.0
1876	Streptomyces~phage~Zemlya	Caudovirales	Siphoviridae	Likavirus	335_0	Clustered	15	VC_335_0	15	0.9982	1.0	0.9982	4	1	1	1.0
1877	Streptomyces~phage~phiCAM	Caudovirales	Siphoviridae	Camvirus	335_0	Clustered	15	VC_335_0	15	0.9982	1.0	0.9982	4	1	1	1.0
1878	Streptomyces~phage~phiELB20	Caudovirales	Siphoviridae	R4virus	335_0	Clustered	15	VC_335_0	15	0.9982	1.0	0.9982	4	1	1	1.0
1879	Streptomyces~phage~phiHau3	Caudovirales	Siphoviridae	Unassigned	335_0	Clustered	15	VC_335_0	15	0.9982	1.0	0.9982	4	1	1	1.0
1880	Streptomyces~phage~phiSAJS1	Caudovirales	Siphoviridae	Woodruffvirus	337_0	Clustered	3	VC_337_0	3	1.0	1.0	1.0	2	1	1	1.0
1881	Streptomyces~virus~TG1	Caudovirales	Siphoviridae	Phic31virus	300_0	Clustered	3	VC_300_0	3	0.8216	0.99691488	0.819	1	1	1	1.0
1882	Streptomyces~virus~phiBT1	Caudovirales	Siphoviridae	Phic31virus	300_0	Clustered	3	VC_300_0	3	0.8216	0.99691488	0.819	1	1	1	1.0
1883	Streptomyces~virus~phiC31	Caudovirales	Siphoviridae	Phic31virus	300_0	Clustered	3	VC_300_0	3	0.8216	0.99691488	0.819	1	1	1	1.0
1884	Stx2-converting~phage~86	Caudovirales	Podoviridae	Traversvirus	187_1	Clustered	14	VC_187_1	14	0.5783	1.0	0.5783	5	1	1	0.8901
1885	Stygiolobus~rod-shaped~virus	Ligamenvirales	Rudiviridae	Rudivirus	25_0	Clustered	12	VC_25_0	12	0.8222	1.0	0.8222	1	1	1	1.0
1886	Sulfitobacter~phage~EE36phi1	Caudovirales	Podoviridae	Baltimorevirus	18_0	Clustered	4	VC_18_0	4	0.1924	0.99998272	0.1923	2	1	1	1.0
1887	Sulfitobacter~phage~NYA-2014a	Unassigned	Unassigned	Unassigned	174_0	Clustered	3	VC_174_0	3	0.9716	0.9859071	0.9579	1	1	1	1.0
1888	Sulfitobacter~phage~pCB2047-A	Unassigned	Unassigned	Unassigned	174_0	Clustered	3	VC_174_0	3	0.9716	0.9859071	0.9579	1	1	1	1.0
1889	Sulfitobacter~phage~pCB2047-C	Unassigned	Unassigned	Unassigned	174_0	Clustered	3	VC_174_0	3	0.9716	0.9859071	0.9579	1	1	1	1.0
1890	Sulfitobacter~phage~phiCB2047-B	Caudovirales	Podoviridae	Baltimorevirus	18_0	Clustered	4	VC_18_0	4	0.1924	0.99998272	0.1923	2	1	1	1.0
1891	Sulfolobales~Virus~YNP2	Unassigned	Unassigned	Unassigned	30_0	Clustered	2	VC_30_0	2	0.6677	0.91813282	0.613	1	1	1	1.0
1892	Sulfolobales~virus~YNP1	Unassigned	Unassigned	Unassigned	30_0	Clustered	2	VC_30_0	2	0.6677	0.91813282	0.613	1	1	1	1.0
1893	Sulfolobus~islandicus~filamentous~virus	Ligamenvirales	Lipothrixviridae	Betalipothrixvirus	26_0	Clustered	6	VC_26_0	6	0.9551	0.99993866	0.9551	1	1	1	1.0
1894	Sulfolobus~islandicus~rod-shaped~virus~1	Ligamenvirales	Rudiviridae	Rudivirus	25_0	Clustered	12	VC_25_0	12	0.8222	1.0	0.8222	1	1	1	1.0
1895	Sulfolobus~islandicus~rod-shaped~virus~10	Ligamenvirales	Rudiviridae	Rudivirus	25_0	Clustered	12	VC_25_0	12	0.8222	1.0	0.8222	1	1	1	1.0
1896	Sulfolobus~islandicus~rod-shaped~virus~11	Ligamenvirales	Rudiviridae	Rudivirus	25_0	Clustered	12	VC_25_0	12	0.8222	1.0	0.8222	1	1	1	1.0
1897	Sulfolobus~islandicus~rod-shaped~virus~2	Ligamenvirales	Rudiviridae	Rudivirus	25_0	Clustered	12	VC_25_0	12	0.8222	1.0	0.8222	1	1	1	1.0
1898	Sulfolobus~islandicus~rod-shaped~virus~4	Ligamenvirales	Rudiviridae	Rudivirus	25_0	Clustered	12	VC_25_0	12	0.8222	1.0	0.8222	1	1	1	1.0
1899	Sulfolobus~islandicus~rod-shaped~virus~5	Ligamenvirales	Rudiviridae	Rudivirus	25_0	Clustered	12	VC_25_0	12	0.8222	1.0	0.8222	1	1	1	1.0
1900	Sulfolobus~islandicus~rod-shaped~virus~6	Ligamenvirales	Rudiviridae	Rudivirus	25_0	Clustered	12	VC_25_0	12	0.8222	1.0	0.8222	1	1	1	1.0
1901	Sulfolobus~islandicus~rod-shaped~virus~7	Ligamenvirales	Rudiviridae	Rudivirus	25_0	Clustered	12	VC_25_0	12	0.8222	1.0	0.8222	1	1	1	1.0
1902	Sulfolobus~islandicus~rod-shaped~virus~8	Ligamenvirales	Rudiviridae	Rudivirus	25_0	Clustered	12	VC_25_0	12	0.8222	1.0	0.8222	1	1	1	1.0
1903	Sulfolobus~islandicus~rod-shaped~virus~9	Ligamenvirales	Rudiviridae	Rudivirus	25_0	Clustered	12	VC_25_0	12	0.8222	1.0	0.8222	1	1	1	1.0
1904	Sulfolobus~islandicus~rudivirus~3	Ligamenvirales	Rudiviridae	Rudivirus	25_0	Clustered	12	VC_25_0	12	0.8222	1.0	0.8222	1	1	1	1.0
1905	Sulfolobus~monocaudavirus~SMV1	Unassigned	Bicaudaviridae	Unassigned	27_0	Clustered	4	VC_27_0	4	0.7331	0.99976889	0.7329	1	1	1	1.0
1906	Sulfolobus~monocaudavirus~SMV2	Unassigned	Bicaudaviridae	Unassigned	27_0	Clustered	4	VC_27_0	4	0.7331	0.99976889	0.7329	1	1	1	1.0
1907	Sulfolobus~monocaudavirus~SMV3	Unassigned	Bicaudaviridae	Unassigned	27_0	Clustered	4	VC_27_0	4	0.7331	0.99976889	0.7329	1	1	1	1.0
1908	Sulfolobus~monocaudavirus~SMV4	Unassigned	Bicaudaviridae	Unassigned	27_0	Clustered	4	VC_27_0	4	0.7331	0.99976889	0.7329	1	1	1	1.0
1909	Sulfolobus~spindle-shaped~virus~1	Unassigned	Fuselloviridae	Alphafusellovirus	28_0	Clustered	9	VC_28_0	9	0.9088	0.99999774	0.9088	2	1	1	1.0
1910	Sulfolobus~spindle-shaped~virus~2	Unassigned	Fuselloviridae	Alphafusellovirus	28_0	Clustered	9	VC_28_0	9	0.9088	0.99999774	0.9088	2	1	1	1.0
1911	Sulfolobus~spindle-shaped~virus~4	Unassigned	Fuselloviridae	Alphafusellovirus	28_0	Clustered	9	VC_28_0	9	0.9088	0.99999774	0.9088	2	1	1	1.0
1912	Sulfolobus~spindle-shaped~virus~5	Unassigned	Fuselloviridae	Alphafusellovirus	28_0	Clustered	9	VC_28_0	9	0.9088	0.99999774	0.9088	2	1	1	1.0
1913	Sulfolobus~spindle-shaped~virus~6	Unassigned	Fuselloviridae	Betafusellovirus	28_0	Clustered	9	VC_28_0	9	0.9088	0.99999774	0.9088	2	1	1	1.0
1914	Sulfolobus~spindle-shaped~virus~7	Unassigned	Fuselloviridae	Alphafusellovirus	28_0	Clustered	9	VC_28_0	9	0.9088	0.99999774	0.9088	2	1	1	1.0
1915	Sulfolobus~turreted~icosahedral~virus~1	Unassigned	Turriviridae	Alphaturrivirus	338_0	Clustered	2	VC_338_0	2	1.0	1.0	1.0	1	1	1	1.0
1916	Sulfolobus~turreted~icosahedral~virus~2	Unassigned	Turriviridae	Alphaturrivirus	338_0	Clustered	2	VC_338_0	2	1.0	1.0	1.0	1	1	1	1.0
1917	Sulfolobus~virus~Kamchatka~1	Unassigned	Fuselloviridae	Alphafusellovirus	28_0	Clustered	9	VC_28_0	9	0.9088	0.99999774	0.9088	2	1	1	1.0
1918	Sulfolobus~virus~Ragged~Hills	Unassigned	Fuselloviridae	Alphafusellovirus	28_0	Clustered	9	VC_28_0	9	0.9088	0.99999774	0.9088	2	1	1	1.0
1919	Sulfolobus~virus~STSV1	Unassigned	Bicaudaviridae	Unassigned	29_0	Clustered	2	VC_29_0	2	0.8003	0.72985431	0.5841	1	1	1	1.0
1920	Sulfolobus~virus~STSV2	Unassigned	Bicaudaviridae	Unassigned	29_0	Clustered	2	VC_29_0	2	0.8003	0.72985431	0.5841	1	1	1	1.0
1921	Synechococcus~phage~ACG-2014b	Caudovirales	Myoviridae	Unassigned	32_6	Clustered	6	VC_32_6	6	0.074	0.99999991	0.074	1	1	1	1.0
1922	Synechococcus~phage~ACG-2014c	Caudovirales	Myoviridae	Unassigned	32_6	Clustered	6	VC_32_6	6	0.074	0.99999991	0.074	1	1	1	1.0
1923	Synechococcus~phage~ACG-2014d	Caudovirales	Myoviridae	Unassigned	32_7	Clustered/Singleton	1	VC_32_7	1	0.0	1.0	0.0	1	1	1	1.0
1924	Synechococcus~phage~ACG-2014e	Caudovirales	Myoviridae	Unassigned	32_13	Clustered	4	VC_32_13	4	0.0576	0.99995349	0.0576	1	1	1	1.0
1925	Synechococcus~phage~ACG-2014f	Caudovirales	Myoviridae	Unassigned	32_26	Clustered/Singleton	1	VC_32_26	1	0.0	1.0	0.0	1	1	1	1.0
1926	Synechococcus~phage~ACG-2014g	Caudovirales	Myoviridae	Unassigned	32_6	Clustered	6	VC_32_6	6	0.074	0.99999991	0.074	1	1	1	1.0
1927	Synechococcus~phage~ACG-2014h	Caudovirales	Myoviridae	Unassigned	32_14	Clustered/Singleton	1	VC_32_14	1	0.0	1.0	0.0	1	1	1	1.0
1928	Synechococcus~phage~ACG-2014i	Caudovirales	Myoviridae	Unassigned	32_13	Clustered	4	VC_32_13	4	0.0576	0.99995349	0.0576	1	1	1	1.0
1929	Synechococcus~phage~ACG-2014j	Caudovirales	Myoviridae	Unassigned	32_13	Clustered	4	VC_32_13	4	0.0576	0.99995349	0.0576	1	1	1	1.0
1930	Synechococcus~phage~S-CAM1	Caudovirales	Myoviridae	Unassigned	32_15	Clustered	2	VC_32_15	2	0.0187	0.95301929	0.0178	1	1	1	1.0
1931	Synechococcus~phage~S-CAM22	Caudovirales	Myoviridae	Unassigned	32_4	Clustered	3	VC_32_4	3	0.0283	0.98643308	0.0279	1	1	1	0.6667
1932	Synechococcus~phage~S-CAM3	Caudovirales	Myoviridae	Unassigned	32_15	Clustered	2	VC_32_15	2	0.0187	0.95301929	0.0178	1	1	1	1.0
1933	Synechococcus~phage~S-CAM4	Caudovirales	Myoviridae	Unassigned	32_13	Clustered	4	VC_32_13	4	0.0576	0.99995349	0.0576	1	1	1	1.0
1934	Synechococcus~phage~S-CAM8	Caudovirales	Myoviridae	Unassigned	32_6	Clustered	6	VC_32_6	6	0.074	0.99999991	0.074	1	1	1	1.0
1935	Synechococcus~phage~S-CAM9	Caudovirales	Myoviridae	Unassigned	32_23	Clustered/Singleton	1	VC_32_23	1	0.0	1.0	0.0	1	1	1	1.0
1936	Synechococcus~phage~S-CBP1	Caudovirales	Podoviridae	Unassigned	207_0	Clustered	19	VC_207_0	19	0.9054	1.0	0.9054	1	1	1	1.0
1937	Synechococcus~phage~S-CBP2	Caudovirales	Podoviridae	Unassigned	207_0	Clustered	19	VC_207_0	19	0.9054	1.0	0.9054	1	1	1	1.0
1938	Synechococcus~phage~S-CBP3	Caudovirales	Podoviridae	Unassigned	207_0	Clustered	19	VC_207_0	19	0.9054	1.0	0.9054	1	1	1	1.0
1939	Synechococcus~phage~S-CBP4	Caudovirales	Podoviridae	Unassigned	207_0	Clustered	19	VC_207_0	19	0.9054	1.0	0.9054	1	1	1	1.0
1940	Synechococcus~phage~S-CBP42	Caudovirales	Podoviridae	Unassigned	207_0	Clustered	19	VC_207_0	19	0.9054	1.0	0.9054	1	1	1	1.0
1941	Synechococcus~phage~S-CBS1	Caudovirales	Siphoviridae	Unassigned	189_0	Clustered	2	VC_189_0	2	0.6975	0.90478487	0.6311	1	1	1	1.0
1942	Synechococcus~phage~S-CBS2	Caudovirales	Siphoviridae	Unassigned	233_0	Clustered	2	VC_233_0	2	0.825	0.87921671	0.7254	1	1	1	1.0
1943	Synechococcus~phage~S-CBS3	Caudovirales	Siphoviridae	Unassigned	189_0	Clustered	2	VC_189_0	2	0.6975	0.90478487	0.6311	1	1	1	1.0
1944	Synechococcus~phage~S-IOM18	Caudovirales	Myoviridae	Unassigned	32_4	Clustered	3	VC_32_4	3	0.0283	0.98643308	0.0279	1	1	1	0.6667
1945	Synechococcus~phage~S-MbCM100	Caudovirales	Myoviridae	Unassigned	32_6	Clustered	6	VC_32_6	6	0.074	0.99999991	0.074	1	1	1	1.0
1946	Synechococcus~phage~S-PM2	Caudovirales	Myoviridae	Unassigned	32_18	Clustered/Singleton	1	VC_32_18	1	0.0	1.0	0.0	1	1	1	1.0
1947	Synechococcus~phage~S-RIM2~R1_1999	Caudovirales	Myoviridae	Unassigned	32_4	Clustered	3	VC_32_4	3	0.0283	0.98643308	0.0279	1	1	1	0.6667
1948	Synechococcus~phage~S-RIM8~A.HR1	Caudovirales	Myoviridae	Unassigned	32_3	Clustered	2	VC_32_3	2	0.0141	0.89716925	0.0126	1	1	1	1.0
1949	Synechococcus~phage~S-RIP1	Caudovirales	Podoviridae	Unassigned	207_0	Clustered	19	VC_207_0	19	0.9054	1.0	0.9054	1	1	1	1.0
1950	Synechococcus~phage~S-RIP2	Caudovirales	Podoviridae	Unassigned	207_0	Clustered	19	VC_207_0	19	0.9054	1.0	0.9054	1	1	1	1.0
1951	Synechococcus~phage~S-RSM4	Caudovirales	Myoviridae	Unassigned	32_10	Clustered/Singleton	1	VC_32_10	1	0.0	1.0	0.0	1	1	1	1.0
1952	Synechococcus~phage~S-SKS1	Caudovirales	Siphoviridae	Unassigned	32_25	Clustered/Singleton	1	VC_32_25	1	0.0	1.0	0.0	1	1	1	1.0
1953	Synechococcus~phage~S-SM1	Caudovirales	Myoviridae	Unassigned	32_32	Clustered	2	VC_32_32	2	0.014	0.88507152	0.0124	1	1	1	1.0
1954	Synechococcus~phage~S-SM2	Caudovirales	Myoviridae	Unassigned	32_24	Clustered/Singleton	1	VC_32_24	1	0.0	1.0	0.0	1	1	1	1.0
1955	Synechococcus~phage~S-SSM4	Caudovirales	Myoviridae	Unassigned	32_9	Clustered/Singleton	1	VC_32_9	1	0.0	1.0	0.0	1	1	1	1.0
1956	Synechococcus~phage~S-SSM5	Caudovirales	Myoviridae	Unassigned	32_32	Clustered	2	VC_32_32	2	0.014	0.88507152	0.0124	1	1	1	1.0
1957	Synechococcus~phage~S-SSM7	Caudovirales	Myoviridae	Unassigned	32_20	Clustered/Singleton	1	VC_32_20	1	0.0	1.0	0.0	1	1	1	1.0
1958	Synechococcus~phage~S-ShM2	Caudovirales	Myoviridae	Unassigned	32_8	Clustered/Singleton	1	VC_32_8	1	0.0	1.0	0.0	1	1	1	1.0
1959	Synechococcus~phage~S-WAM1	Caudovirales	Myoviridae	Unassigned	32_27	Clustered/Singleton	1	VC_32_27	1	0.0	1.0	0.0	1	1	1	1.0
1960	Synechococcus~phage~S-WAM2	Caudovirales	Myoviridae	Unassigned	32_12	Clustered/Singleton	1	VC_32_12	1	0.0	1.0	0.0	1	1	1	1.0
1961	Synechococcus~phage~Syn19	Caudovirales	Myoviridae	Unassigned	32_2	Clustered/Singleton	1	VC_32_2	1	0.0	1.0	0.0	1	1	1	1.0
1962	Synechococcus~phage~metaG-MbCM1	Caudovirales	Myoviridae	Unassigned	32_29	Clustered	2	VC_32_29	2	0.0154	0.94040411	0.0145	1	1	1	1.0
1963	Synechococcus~phage~syn9	Caudovirales	Myoviridae	Unassigned	32_5	Clustered/Singleton	1	VC_32_5	1	0.0	1.0	0.0	1	1	1	1.0
1964	Synechococcus~virus~P60	Caudovirales	Podoviridae	Unassigned	207_0	Clustered	19	VC_207_0	19	0.9054	1.0	0.9054	1	1	1	1.0
1965	Synechococcus~virus~Syn5	Caudovirales	Podoviridae	Unassigned	207_0	Clustered	19	VC_207_0	19	0.9054	1.0	0.9054	1	1	1	1.0
1966	Thermoproteus~tenax~spherical~virus~1	Unassigned	Globuloviridae	Globulovirus	326_0	Clustered	2	VC_326_0	2	1.0	1.0	1.0	1	1	1	1.0
1967	Thermus~phage~TMA	Caudovirales	Myoviridae	Unassigned	339_0	Clustered	2	VC_339_0	2	1.0	1.0	1.0	1	1	1	1.0
1968	Thermus~phage~phiYS40	Caudovirales	Myoviridae	Unassigned	339_0	Clustered	2	VC_339_0	2	1.0	1.0	1.0	1	1	1	1.0
1969	Thermus~virus~IN93	Unassigned	Sphaerolipoviridae	Gammasphaerolipovirus	340_0	Clustered	2	VC_340_0	2	1.0	1.0	1.0	1	1	1	1.0
1970	Thermus~virus~P23-45	Caudovirales	Siphoviridae	P23virus	341_0	Clustered	2	VC_341_0	2	1.0	1.0	1.0	1	1	1	1.0
1971	Thermus~virus~P23-77	Unassigned	Sphaerolipoviridae	Gammasphaerolipovirus	340_0	Clustered	2	VC_340_0	2	1.0	1.0	1.0	1	1	1	1.0
1972	Thermus~virus~P74-26	Caudovirales	Siphoviridae	P23virus	341_0	Clustered	2	VC_341_0	2	1.0	1.0	1.0	1	1	1	1.0
1973	Tsukamurella~phage~TIN2	Caudovirales	Siphoviridae	Tin2virus	268_1	Clustered	3	VC_268_1	3	0.2031	0.9978474	0.2027	1	1	1	1.0
1974	Tsukamurella~phage~TIN3	Caudovirales	Siphoviridae	Tin2virus	268_1	Clustered	3	VC_268_1	3	0.2031	0.9978474	0.2027	1	1	1	1.0
1975	Tsukamurella~phage~TIN4	Caudovirales	Siphoviridae	Tin2virus	268_1	Clustered	3	VC_268_1	3	0.2031	0.9978474	0.2027	1	1	1	1.0
1976	Uncultured~phage~WW-nAnB~strain~2	Unassigned	Inoviridae	Unassigned	342_0	Clustered	3	VC_342_0	3	1.0	0.0	0.0	1	1	1	1.0
1977	Uncultured~phage~WW-nAnB~strain~3	Unassigned	Inoviridae	Unassigned	342_0	Clustered	3	VC_342_0	3	1.0	0.0	0.0	1	1	1	1.0
1978	Vibrio~phage~11895-B1	Caudovirales	Myoviridae	Unassigned	222_3	Clustered/Singleton	1	VC_222_3	1	0.0	1.0	0.0	1	1	1	1.0
1979	Vibrio~phage~Aphrodite1	Caudovirales	Myoviridae	Aphroditevirus	226_0	Clustered	3	VC_226_0	3	0.2482	0.99829134	0.2477	2	1	1	1.0
1980	Vibrio~phage~CHOED	Caudovirales	Podoviridae	Unassigned	197_0	Clustered	2	VC_197_0	2	0.7153	0.5	0.3576	1	1	1	1.0
1981	Vibrio~phage~CP-T1	Caudovirales	Myoviridae	Unassigned	70_0	Clustered	8	VC_70_0	8	0.8477	1.0	0.8477	3	1	1	0.7857
1982	Vibrio~phage~Ceto	Caudovirales	Siphoviridae	Cetovirus	253_1	Clustered	3	VC_253_1	3	0.1702	0.99809694	0.1699	1	1	1	1.0
1983	Vibrio~phage~ICP1	Caudovirales	Myoviridae	Unassigned	222_4	Clustered/Singleton	1	VC_222_4	1	0.0	1.0	0.0	1	1	1	1.0
1984	Vibrio~phage~ICP2	Caudovirales	Podoviridae	Unassigned	198_0	Clustered	2	VC_198_0	2	0.6605	0.93722274	0.619	1	1	1	1.0
1985	Vibrio~phage~ICP2_2013_A_Haiti	Caudovirales	Podoviridae	Unassigned	198_0	Clustered	2	VC_198_0	2	0.6605	0.93722274	0.619	1	1	1	1.0
1986	Vibrio~phage~ICP3	Caudovirales	Podoviridae	Teseptimavirus	206_0	Clustered	60	VC_206_0	60	0.9832	1.0	0.9832	4	1	1	1.0
1987	Vibrio~phage~J2	Caudovirales	Podoviridae	Enhodamvirus	343_0	Clustered	5	VC_343_0	5	1.0	1.0	1.0	2	1	1	1.0
1988	Vibrio~phage~JSF10	Caudovirales	Siphoviridae	Jesfedecavirus	253_0	Clustered	2	VC_253_0	2	0.0793	0.95110848	0.0754	1	1	1	1.0
1989	Vibrio~phage~N4	Caudovirales	Podoviridae	Teseptimavirus	206_0	Clustered	60	VC_206_0	60	0.9832	1.0	0.9832	4	1	1	1.0
1990	Vibrio~phage~PWH3a-P1	Unassigned	Unassigned	Unassigned	222_1	Clustered/Singleton	1	VC_222_1	1	0.0	1.0	0.0	1	1	1	1.0
1991	Vibrio~phage~QH	Caudovirales	Podoviridae	Enhodamvirus	343_0	Clustered	5	VC_343_0	5	1.0	1.0	1.0	2	1	1	1.0
1992	Vibrio~phage~SIO-2	Caudovirales	Siphoviridae	Unassigned	318_0	Clustered	3	VC_318_0	3	0.4147	0.98631307	0.4091	2	1	1	0.6667
1993	Vibrio~phage~SSP002	Caudovirales	Siphoviridae	Ssp2virus	346_0	Clustered	2	VC_346_0	2	0.9927	0.5	0.4963	1	1	1	1.0
1994	Vibrio~phage~Thalassa	Caudovirales	Siphoviridae	Cetovirus	253_1	Clustered	3	VC_253_1	3	0.1702	0.99809694	0.1699	1	1	1	1.0
1995	Vibrio~phage~VEJphi	Unassigned	Inoviridae	Fibrovirus	347_0	Clustered	4	VC_347_0	4	0.7517	0.99829738	0.7504	1	1	1	1.0
1996	Vibrio~phage~VFJ	Unassigned	Inoviridae	Saetivirus	348_0	Clustered	2	VC_348_0	2	1.0	1.0	1.0	1	1	1	1.0
1997	Vibrio~phage~VGJphi	Unassigned	Inoviridae	Fibrovirus	347_0	Clustered	4	VC_347_0	4	0.7517	0.99829738	0.7504	1	1	1	1.0
1998	Vibrio~phage~VHML	Caudovirales	Myoviridae	Vhmlvirus	108_0	Clustered	3	VC_108_0	3	0.2366	0.99836724	0.2363	1	1	1	1.0
[truncated: 614 more rows]
