# Supplementary material for: Novel Siphoviridae Bacteriophages Infecting Bacteroides uniformis Contain Diversity Generating Retroelement
Source: Microorganisms. 2021 Apr 21;9(5):892. doi: 10.3390/microorganisms9050892 (PMC8143477; doi:10.3390/microorganisms9050892)
Supplement: Supplementary file 1 [file microorganisms-09-00892-s001.zip › Table S3_Functional annotation of Bacuni ORFs.xlsx]

## Sheet: ORF_list_Bacuni phage
ORF number (Bacuni phage F1)	Putative function (based on conserved protein domains)	Putative conserved protein domain (CDD, Pfam, Virfam, Phyre2)	Protein domain prediction tool	Predicted signal peptide (SignalP-5.0, Phyre22)	Transmembrane domain prediction (Phyre2)	Start	End	Position	Closest blast hit (BLASTp)	Query Cover (BLASTp)	E value (BLASTp)	Per. Ident (BLASTp)	Accession (NCBI)
ORF1	Phage terminase, small subunit (TerS)	Terminase_4 super family (cl01525), Pfam05119	CDD			15107	15484	c	P27 family phage terminase small subunit [Bacteroides acidifaciens]	98%	3e-61	72.36%	WP_136013793.1
ORF2	Terminase large subunit (TerL)	YmfN (COG4626), Terminase_1 (Pfam03354), dna packaging protein gp17 structure of large terminase (Phyre2)	CDD, Pfam, Phyre2			13404	15110	c	terminase large subunit [Bacteroides acidifaciens]	100%	0.0	84.86%	WP_136013795.1
ORF3	Transcriptional regulator	Med3 super family (cl26459), viral membrane protein involved in cell invasion (Phyre2)	CDD, Phyre2			12930	13163		MULTISPECIES: hypothetical protein [Bacteroides]	97%	4e-21	61.33%	WP_122127244.1
ORF4	universal stress protein	Usp (Pfam00582), USP_Like (cd00293), SAM domain-like - NAD+-dependent DNA ligase (Phyre2)	CDD, Pfam, Phyre2			12522	12875		universal stress protein [Mycolicibacterium malmesburyense]	43%	0.55	36.54%	WP_090343089.1
ORF5	Portal protein	Phage_portal (Pfam04860), hk97 family phage portal protein (Phyre2)	CDD, Pfam, Phyre2			11097	12362	c	phage portal protein [Bacteroides acidifaciens]	96%	0.0	72.30%	WP_136013796.1
ORF6	HK97 family phage prohead protease	Peptidase_S78 super family (cl01521), virus serine proteinase (Phyre2)	Phyre2			10424	11110	c	HK97 family phage prohead protease [Bacteroides acidifaciens]	96%	9e-113	71.49%	WP_136013797.1
ORF7	Major capsid protein (MCP)	Phage_capsid super family (cl27082), Major capsid protein gp5 (Phyre2)	CDD, Phyre2			9273	10397	c	phage major capsid protein [Prevotellamassilia timonensis]	97%	0.0	75.82%	WP_071121925.1
ORF8	Phage gp6-like head-tail connector protein – Ad1, adaptor (VirFam)	gp6 (cd08054), bacteriophage hk97 gp6 (Phyre2)	CDD, Phyre2			8916	9233	c	phage gp6-like head-tail connector protein [Bacteroides acidifaciens]	95%	2e-55	85.15%	WP_136013799.1
ORF9	Phage head-tail joining protein – Hc1 Head-closure (VirFam)	Phage_H_T_join super family (cl11461), Phage_H_T_join (Pfam05521), putative head-tail adaptor (Phyre2)	CDD, VirFam, Phyre2			8599	8919	c	head-tail adaptor protein [Bacteroides acidifaciens]	100%	6e-51	69.81%	WP_136013800.1
ORF10	Neck protein (VirFam)	alpha-alpha superhelix - FliG family (Phyre2), Ne1 – neck protein (VirFam)	VirFam, Phyre2			8062	8595	c	hypothetical protein [Bacteroides acidifaciens]	97%	2e-76	65.90%	WP_136013801.1
ORF11	DUF3168 domain / Tail completion protein	DUF3168 super family (cl12902), viral protein - structure of bacteriophage spp1 gp17 protein (Phyre2), Tc1 – Tail completion protein (VirFam)	CDD, VirFam, Phyre2			7686	8075	c	DUF3168 domain-containing protein [Bacteroides acidifaciens]	100%	6e-55	68.22%	WP_136013802.1
ORF12	Phage tail tube protein	Phage_TTP_12 super family (cl11463), Phage_TTP_12 super family (cl11463); Major tail protein: the solution structure of gpv, the major tail protein from2 bacteriophage lambda (Phyre2)	CDD, Phyre2, VirFam			7213	7680	c	hypothetical protein [Porphyromonas cangingivalis]	96%	1e-86	82.00%	WP_025839160.1
ORF13	Hypothetical protein					6904	7206	c	hypothetical protein [Bacteroides acidifaciens]	98%	2e-51	78.57%	WP_136013804.1
ORF14	Hypothetical protein					6554	6964	c	hypothetical protein [Bacteroides acidifaciens]	72%	4e-44	72.45%	WP_136013805.1
ORF15	Phage tail tape meassure protein	PhageMin_Tail super family (cl34767), rad50 super family (cl31018), de novo protein - designed helical bundle; signaling protein (Phyre2)	CDD, Pfam, Phyre2		4 transmembrane helices: 259 -extracellular N-Terminal -> 287 (S1) -> 291 (extra) - 313 (S2) -> 317 (extra) - 334 (S39 -> 341 - 359: C- Terminal (extracellular).	3955	6546	c	hypothetical protein [Bacteroides acidifaciens]	100%	8e-74	76.67%	WP_136013806.1
ORF16	Hypothetical protein					1680	3953	c	hypothetical protein [Bacteroides uniformis]	99%	0.0	50.40%	WP_117681154.1
ORF17	Hypothetical protein	Carbohydrate binding domain with WW domain-like fold, putative hydrolase function (Phyre2)	Phyre2	TAT signal peptide (Tat/SPI), Cleavage site between pos. 53 and 54: THA-NL. Probability: 0.1836		1	1674	c	hypothetical protein [Prevotella sp. P3-122]	99%	0.0	65.05%	WP_094400975.1
ORF18	Hypothetical protein with carbohydrate binding domain	CBM_4_9 super family (cl19911)	CDD			39251	40405	c	hypothetical protein [Prevotella sp. P3-122]	96%	2e-131	49.87%	WP_094400973.1
ORF19	Hypothetical protein					38796	39236	c	hypothetical protein [Muribaculum intestinale]	73%	2e-36	60.17%	WP_123611840.1
ORF20	Outer capsid protein	viral protein: outer capsid protein- hoc head outer capsid protein (Phyre2)	Phyre2			37756	38799	c	hypothetical protein [Muribaculum intestinale]	99%	0.0	71.97%	WP_135992965.1
ORF21	Hypothetical protein	Carbohydrate binding domain with WW domain-like fold, putative hydrolase function (Phyre2)	Phyre2			36676	37752	c	hypothetical protein [Bacteroides intestinalis]	96%	2e-80	40.05%	WP_130070081.1
ORF22	DGR: Target protein DUF1566 - fimbrial tip protein	DUF1566 (Pfam07603), fimbrial protein - cell adhesion - putative invasin (Phyre2)	CDD, Pfam, Phyre2, MyDGR	Signal peptide (Sec/SPI), Cleavage site between pos. 21 and 22: TTS-QY. Probability: 0.1979		35885	36646	c	hypothetical protein [Bacteroides uniformis]	98%	1e-121	70.80%	WP_118936896.1
ORF23	DGR: Accessory variability determinant (bAvd) protein	Avd_like (cd16376), 23S_rRNA_IVP ; bbp7 - nucleic acid binding protein - vd molecule from bordetella bacteriophage dgr (Phyre2)	CDD, Phyre2, MyDGR			35424	35807	c	putative uncharacterized protein [Prevotella sp. CAG:732]	91%	1e-50	62.93%	CDD19727.1
ORF24	DUF1566 domain protein	DUF1566 (Pfam07603), RT_Bac_retron_I (cd01646)	CDD. Pfam	Signal peptide (Sec/SPI), Cleavage site between pos. 30 and 31: ARA-AR. Probability: 0.9009		35151	35396	c	DUF1566 domain-containing protein [Prevotella sp. P3-122]	60%	2e-08	64.71%	WP_094401785.1
ORF25	DGR: RNA-directed DNA polymerase	RT_Bac_retron_I (cd01646); maturase reverse transcriptase - rna/dna/nucleic acid binding protein (Phyre2)	CDD, Pfam, Phyre2, MyDGR	Signal peptide (Sec/SPI), Cleavage site between pos. 30 and 31: ARA-AR. Probability: 0.9009		34024	35154	c	RNA-directed DNA polymerase [Prevotella sp. P3-122]	100%	0.0	64.05%	WP_094400959.1
ORF26	Hypothetical protein					33538	33888	c	putative uncharacterized protein [Prevotella sp. CAG:732]	97%	1e-42	59.29%	CDD20641.1
ORF27	Lysin - N-acetylmuramoyl-L-alanine amidase	PGRP super family (cl02712), Amidase_2	CDD, Pfram, Phyre2, Cazy			33135	33536	c	MULTISPECIES: N-acetylmuramoyl-L-alanine amidase [unclassified Muribaculaceae]	100%	8e-69	73.68%	WP_123407949.1
ORF28	Arm DNA-binding domain, membrane protein	voltage-dependent calcium channel gamma-8 subunit (Phyre2)	Phyre2	1-40 Signal peptide: Lipoprotein signal peptide (Sec/SPII) (Phyre2&Signal IP); Cleavage site between pos. 15 and 16: LAS-CA. Probability: 0.9939	Transmembrane helix S1: 121 - N-terminal (extracellular), 142 - C -terminal (Cytoplasmic)	32692	33132	c	hypothetical protein [Bacteroides acidifaciens]	100%	1e-62	65.75%	WP_136014869.1
ORF29	Recombinase	DNA_BRE_C super family (cl00213), Arm-DNA-bind_5 (Pfam17293), Phage_int_SAM_5 (Pfam13102), Arm-DNA-bind_5 (CL0081 )-Pfam, Phage integrase SAM-like domain (CL0469 )-Pfam; xerh site-specific tyrosine recombinase bound to2 palindromic difh substrate: post-cleavage complex (Phyre2)	CDD, Pfam, Phyre2			31354	32640		recombinase [Bacteroides acidifaciens]	100%	0.0	78.04%	WP_136014868.1
ORF30	Hypothetical protein					30700	31122		hypothetical protein [Prevotella sp. P2-180]	100%	8e-06	28.75%	WP_094386135.1
ORF31	Transcriptional phage cycle regulator	PRK13355 super family (cl36239), :putative transposon-related dna-binding protein, transcription regulator (xre family), lambda repressor-like DNA-binding domains (Phyre2)	CDD, Phyre2	Signal peptide (Sec/SPI): 0.0023; Lipoprotein signal peptide (Sec/SPII): 0.9976		30314	30703		transcriptional regulator [Prevotella sp. DNF00663]	100%	2e-63	74.07%	WP_062435793.1
ORF32	Hypothetical protein					29814	30050	c	hypothetical protein [Prevotella sp. DNF00663]	96%	2e-31	68.00%	WP_062435798.1
ORF33	Hypothetical protein					29347	29601	c	TPA: hypothetical protein [Alistipes putredinis]	83%	0.0009	30.99%	HCV84290.1
ORF34	Hypothetical protein / putative signaling protein with two transmebrane helices	Outer membrane protein (Phyre2)	Phyre2		Two connceted transmembrane helices, N and C Terminals are extracellular. S1 (15 - N terminal in extracellular space and 30 in intracellular conected to 37 in S2) and S2 (from position 37 inside to 56 - C-terminal domain in extracellular).	29107	29343	c	hypothetical protein [Bacteroides acidifaciens]	98%	1e-23	55.84%	WP_136013778.1
ORF35	DUF3086 domain	DUF3086 super family (cl12827)	CDD			28552	29055	c	hypothetical protein [Bacteroides acidifaciens]	100%	3e-37	48.54%	WP_136013779.1
ORF36	DUF2800 / Rad52 superfamily (VirFam), atp-dependent dna helicase (Phyre2)	DUF2800 (Pfam10926), DUF2800 (CL0236 )-Pfam; :dna binding protein with atp-dependent dna helicase (uvrd/rep)/ crispr-associated exonuclease, cas4 family; (Phyre2)	CDD, Pfam, Phyre2		One transmembrane helix: S1: 254: N-terminal (extracellular) -> 269: C- terminal (cytoplasmic)	27398	28564	c	DUF2800 domain-containing protein [Bacteroides acidifaciens]	98%	0.0	75.39%	WP_136013780.1
ORF37	Hypothetical protein					27066	27398	c	hypothetical protein [Prevotella sp. P6B4]	98%	4e-10	35.40%	WP_028904412.1
ORF38	CRISPR/Cas system-associated protein Cas4	PRK10263 super family (cl35903), PD-(D/E)XK nuclease superfamily (Pfam12705)	CDD, Pfam			26612	26887	c	hypothetical protein BWK80_60780 [Desulfobacteraceae bacterium IS3]	68%	0.36	32.26%	OQX01056.1
ORF39	DUF2815, putative phage sRNA	DUF2815 (Pfam10991), DUF2815 (CL0021 )-Pfam, phage-related protein - single-stranded dna-binding protein (Phyre2)	CDD, Pfam, Phyre2			26031	26591	c	DUF2815 family protein [Prevotella sp. DNF00663]	93%	2e-99	86.71%	WP_062434596.1
ORF40	Hypothetical protein					25507	25965	c	hypothetical protein HMPREF3034_01726 [Prevotella sp. DNF00663]	27%	2e-10	64.29%	KXB82273.1
ORF41	DNA polymerase A	DNA_pol_A super family (cl02626), DNA_pol_A (Pfam), dna polymerase i - transferaze (Phyre2)	CDD, Pfam, Phyre2			23558	25504	c	hypothetical protein [Bacteroides acidifaciens]	100%	0.0	82.54%	WP_136013782.1
ORF42	Hypothetical protein					23209	23553	c	hypothetical protein [Bacteroides acidifaciens]	93%	4e-32	57.80%	WP_136013783.1
ORF43	DGR: DUF1566 domain-containing protein / Fimbrial tip protein	DUF1566 super family (cl06585), Fib_succ_major, fimbrial protein (bacova_04982) from2 bacteroides ovatus (Phyre2)	CDD, Phyre2, MyDGR			22548	23222	c	hypothetical protein [Prevotella sp. OH937_COT-195]	97%	3e-49	44.07%	WP_125235023.1
ORF44	DNA (cytosine-5-)-methyltransferase	AdoMet_MTases super family (cl17173), DNA_methylase (CL0063) -Pfam, C5 cytosine-specific DNA methylase, DCM (Phyre2)	CDD, Pfam, Phyre2			21720	22460	c	hypothetical protein [Prevotella sp. P3-122]	97%	3e-122	68.88%	WP_094401782.1
ORF45	DNA (cytosine-5-)-methyltransferase	Cyt_C5_DNA_methylase super family (cl30459), DNA_methylase (CL0063) -Pfam, dna (cytosine-5)-methyltransferase 1 (Phyre2)	CDD, Pfam, Phyre2			20992	21192	c	hypothetical protein [Prevotella sp. OH937_COT-195]	95%	4e-26	76.56%	WP_125235017.1
ORF46	Carbohydrate esterase 4	CE4_SF super family (cl15692)	CDD			20640	20846	c	hypothetical protein [Prevotella sp. P3-122]	80%	2e-08	43.64%	WP_094401015.1
ORF47	Primase superfamily of DNA polymerases (Iyer et al., 2005) Virulence-associated protein E (P-loop containing nucleoside triphosphate hydrolase)	VirE super family (cl37544), vrr_nuc domain nuclease (hydrolase), translocase - Phyre2; primase superfamily of DNA polymerases (Iyer et al., 2005)	CDD, Phyre2			18233	20656	c	hypothetical protein [Porphyromonas gingivicanis]	99%	0.0	76.89%	WP_036883096.1
ORF48	VRR-NUC domain hydrolase	VRR_NUC (smart00990)	CDD, Phyre2			17626	17952	c	VRR-NUC domain-containing protein [Porphyromonas gingivicanis]	100%	2e-47	68.52%	WP_052102438.1
ORF49	DEAD/DEAH box helicase	DEAD-like_helicase_N super family (cl28899) HepA (COG0553), recombination/dna binding - similar to rad54-like (Phyre2), transcription regulation, SNF2 family N-terminal domain (CL0023 ) -Pfam	CDD, Pfam, Phyre2		S1: 21: N-Terminal (extracellular) -> 36-C-Terminal (cytoplasmic)	16253	17629	c	DEAD/DEAH box helicase [Porphyromonas gingivicanis]	100%	0.0	84.72%	WP_036883098.1
ORF50	Hypothetical protein					15958	16260	c	hypothetical protein [Bacteroides acidifaciens]	92%	1e-35	63.04%	WP_136013791.1
ORF51	HNH endonuclease	HNHc (cd00085), HNH (CL0263 ) -Pfam, hnh endonuclease (Phyre2)	CDD, Pfam, Phyre2		Transmembrane helices - S1 (57 - C-terminal in extrocellular space, 42 - N terminal - intracellular)	15633	15980	c	HNH endonuclease [Bacteroides acidifaciens]	96%	6e-52	68.47%	WP_136013792.1

## Sheet: List1
ORF1
ORF2
ORF3...
ORF51.
ORF1
ORF2
ORF3...
