# Supplementary material for: Novel Siphoviridae Bacteriophages Infecting Bacteroides uniformis Contain Diversity Generating Retroelement
Source: Microorganisms. 2021 Apr 21;9(5):892. doi: 10.3390/microorganisms9050892 (PMC8143477; doi:10.3390/microorganisms9050892)
Supplement: Supplementary file 1 [file microorganisms-09-00892-s001.zip › Table S4 Genetic differences in genes of Bacuni host derivatives.xlsx]

## Sheet: Table3
Original host B. uniformis MB18-80 genome location	Putative function (CDD)	Closest BLASTp hit and NCBI accession*	SNP in B. uniformis MB18-80 K (immune)	SNP in B. uniformis MB18-80 PH (switched tropism)
Node 3, complement (153374..154651)	Type I restriction-modification system specificity (S) subunit	MULTISPECIES: restriction endonuclease subunit S [Bacteroidales]; WP_117795664.1	+	+
Node 3 (150509..151960)	Type I restriction-modification system specificity (S) subunit	MULTISPECIES: restriction endonuclease subunit S [Bacteroidales]; WP_118086673.1	+	+
Node 15 (7330..10542)	TonB-linked outer membrane protein ( SusC/RagA family)	SusC/RagA family TonB-linked outer membrane protein [Bacteroides uniformis dnLKV2]; EOS06643.1	+	-
Node 50 (1146..4169)	TonB-linked outer membrane protein, SusC receptor ( SusC/RagA family)	TonB-dependent receptor [Bacteroides uniformis]; WP_080597360.1	+	-
Node 71 (1855..2994)	Outer-membrane protein OmpA, DUF5082	MULTISPECIES: OmpA family protein [Bacteroides]; WP_034528676.1	-	+
Node 71 (20..910)	Putative porin – Exopolysaccharide biosynthesis protein YbjH	MULTISPECIES: hypothetical protein [Bacteroides], WP_034528957.1	-	+
Node 70 (1..3431)	Putative porin – Exopolysaccharide biosynthesis protein YbjH	hypothetical protein [Bacteroides sp. AF26-10BH], WP_120141442.1	-	+
Node 70 (1906..3030)	Outer-membrane protein OmpA, DUF5082	MULTISPECIES: OmpA family protein [Bacteroides]; WP_034528679.1	-	+
Node 54 (1..13599)	Putative porin – Exopolysaccharide biosynthesis protein YbjH	YjbH domain-containing protein [Bacteroides uniformis]; WP_147392574.1	-	+
Node 21, complement (89651..90127)	Putative porin – Exopolysaccharide biosynthesis protein YbjH	YjbH domain-containing protein [Bacteroides uniformis]; WP_147392573.1	-	+
Node 19, complement (93435..94127)	N-terminal domain of peptidoglycan hydrolase CwlO, DUF4988	putative uncharacterized protein [Bacteroides uniformis CAG:3]	-	+
*BLASTp Coverage range from 96% to 100%, identitiy from 99.5% to 100%
