# Supplementary figures and images for: Novel Siphoviridae Bacteriophages Infecting Bacteroides uniformis Contain Diversity Generating Retroelement
Source: MDPI journal article supplement (doi:10.3390/microorganisms9050892), 2021-04-21

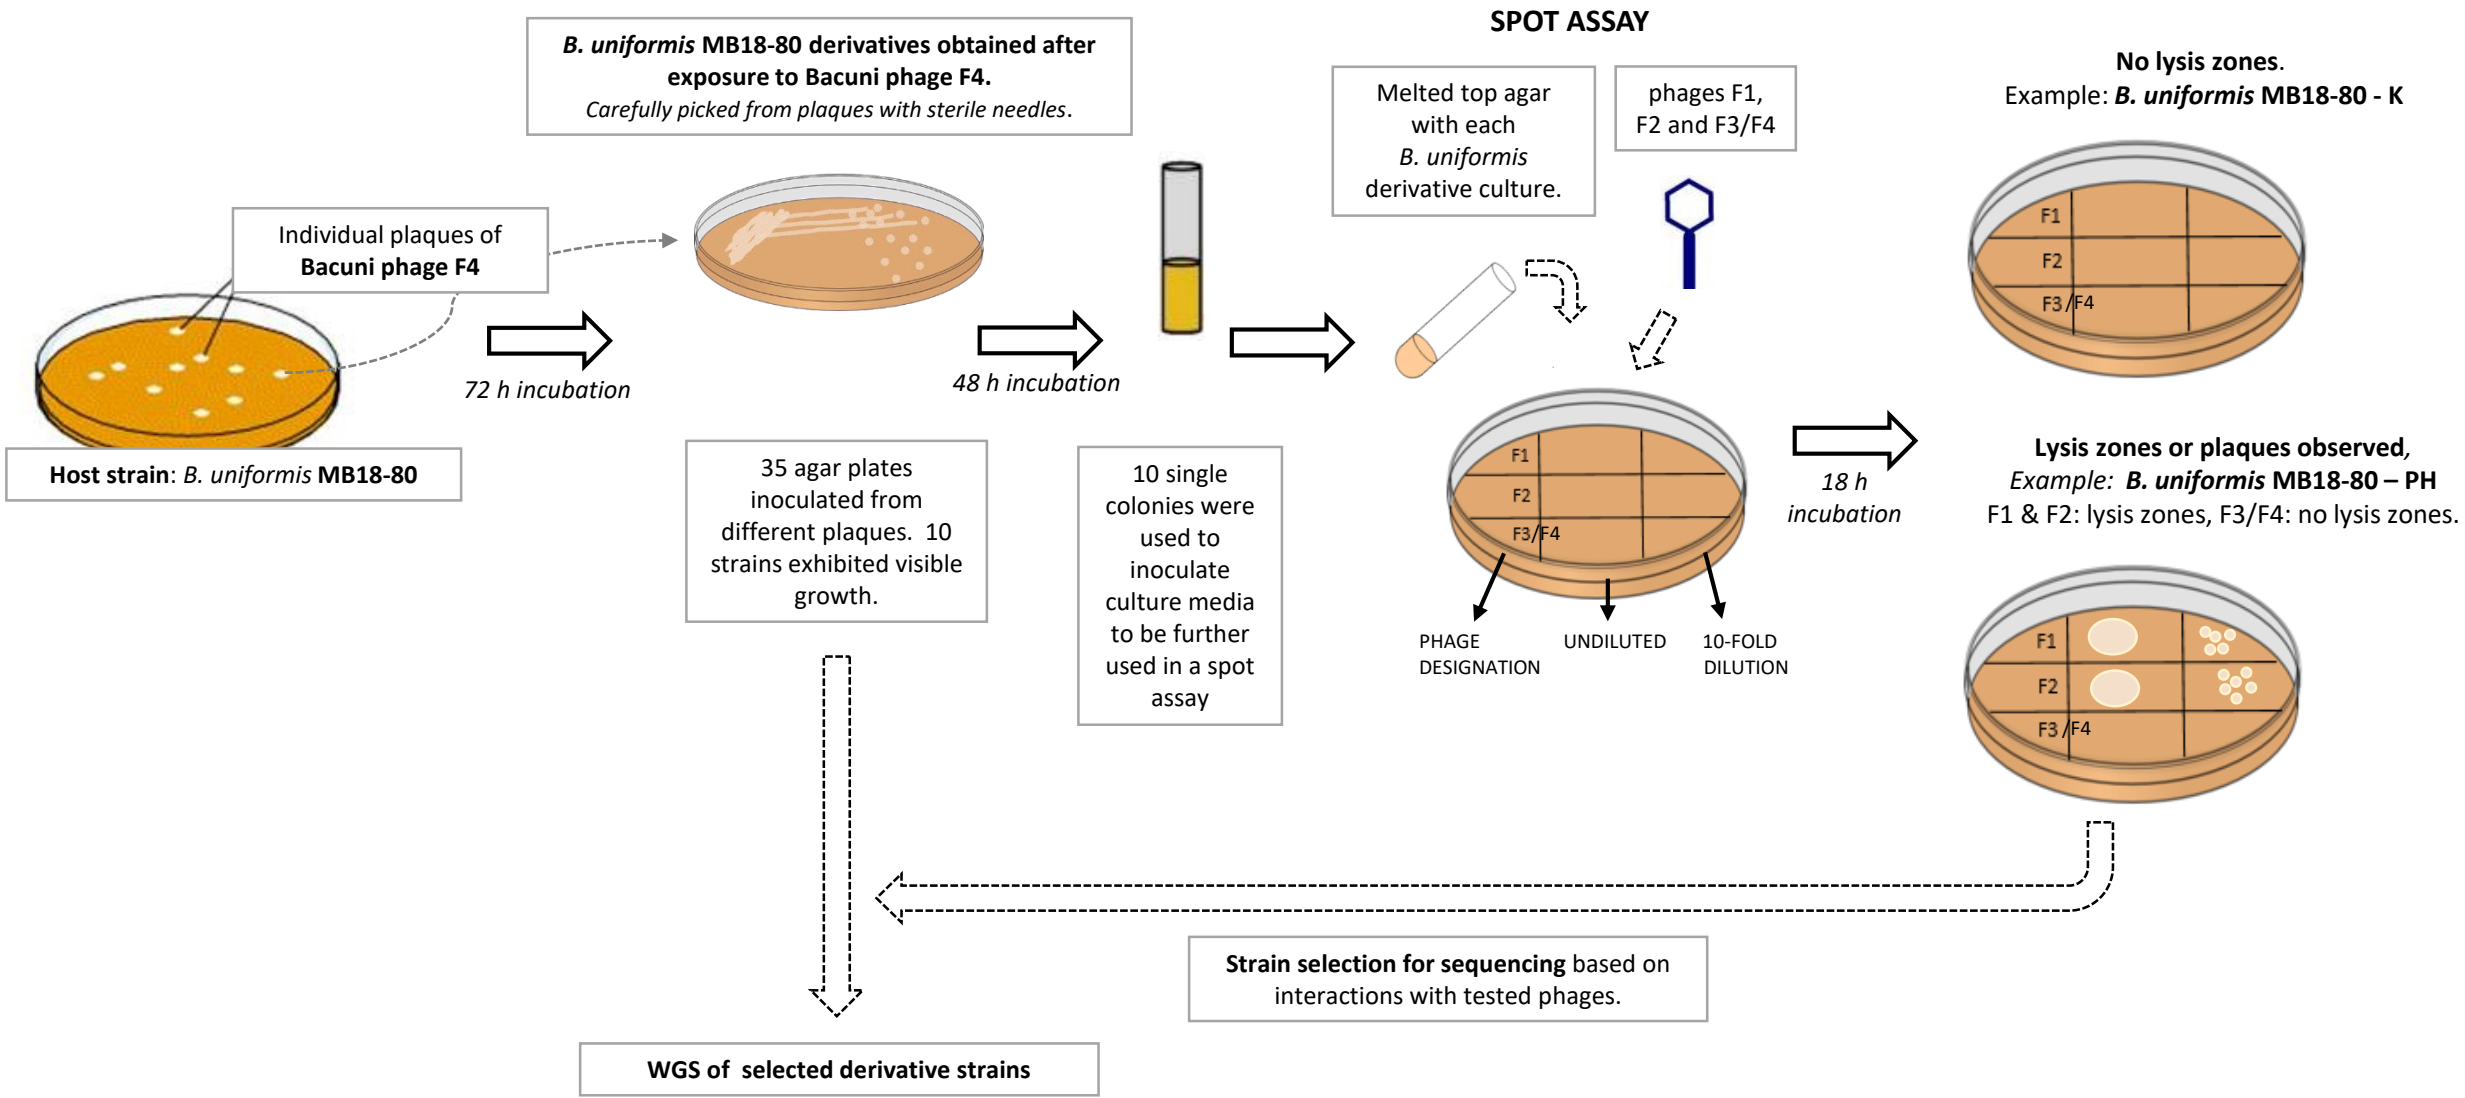

Supplement: s1 [file s1]

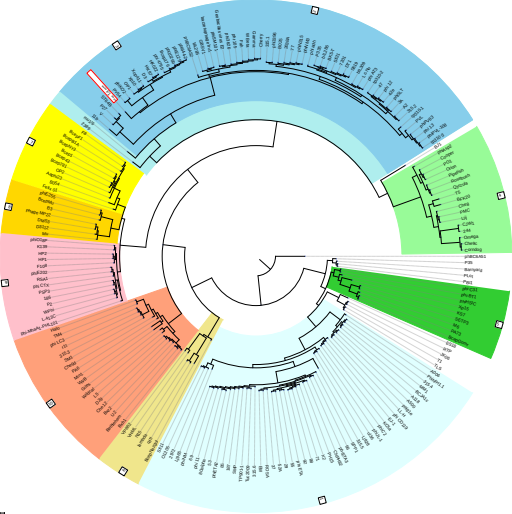

Supplement: s1 [file s1]

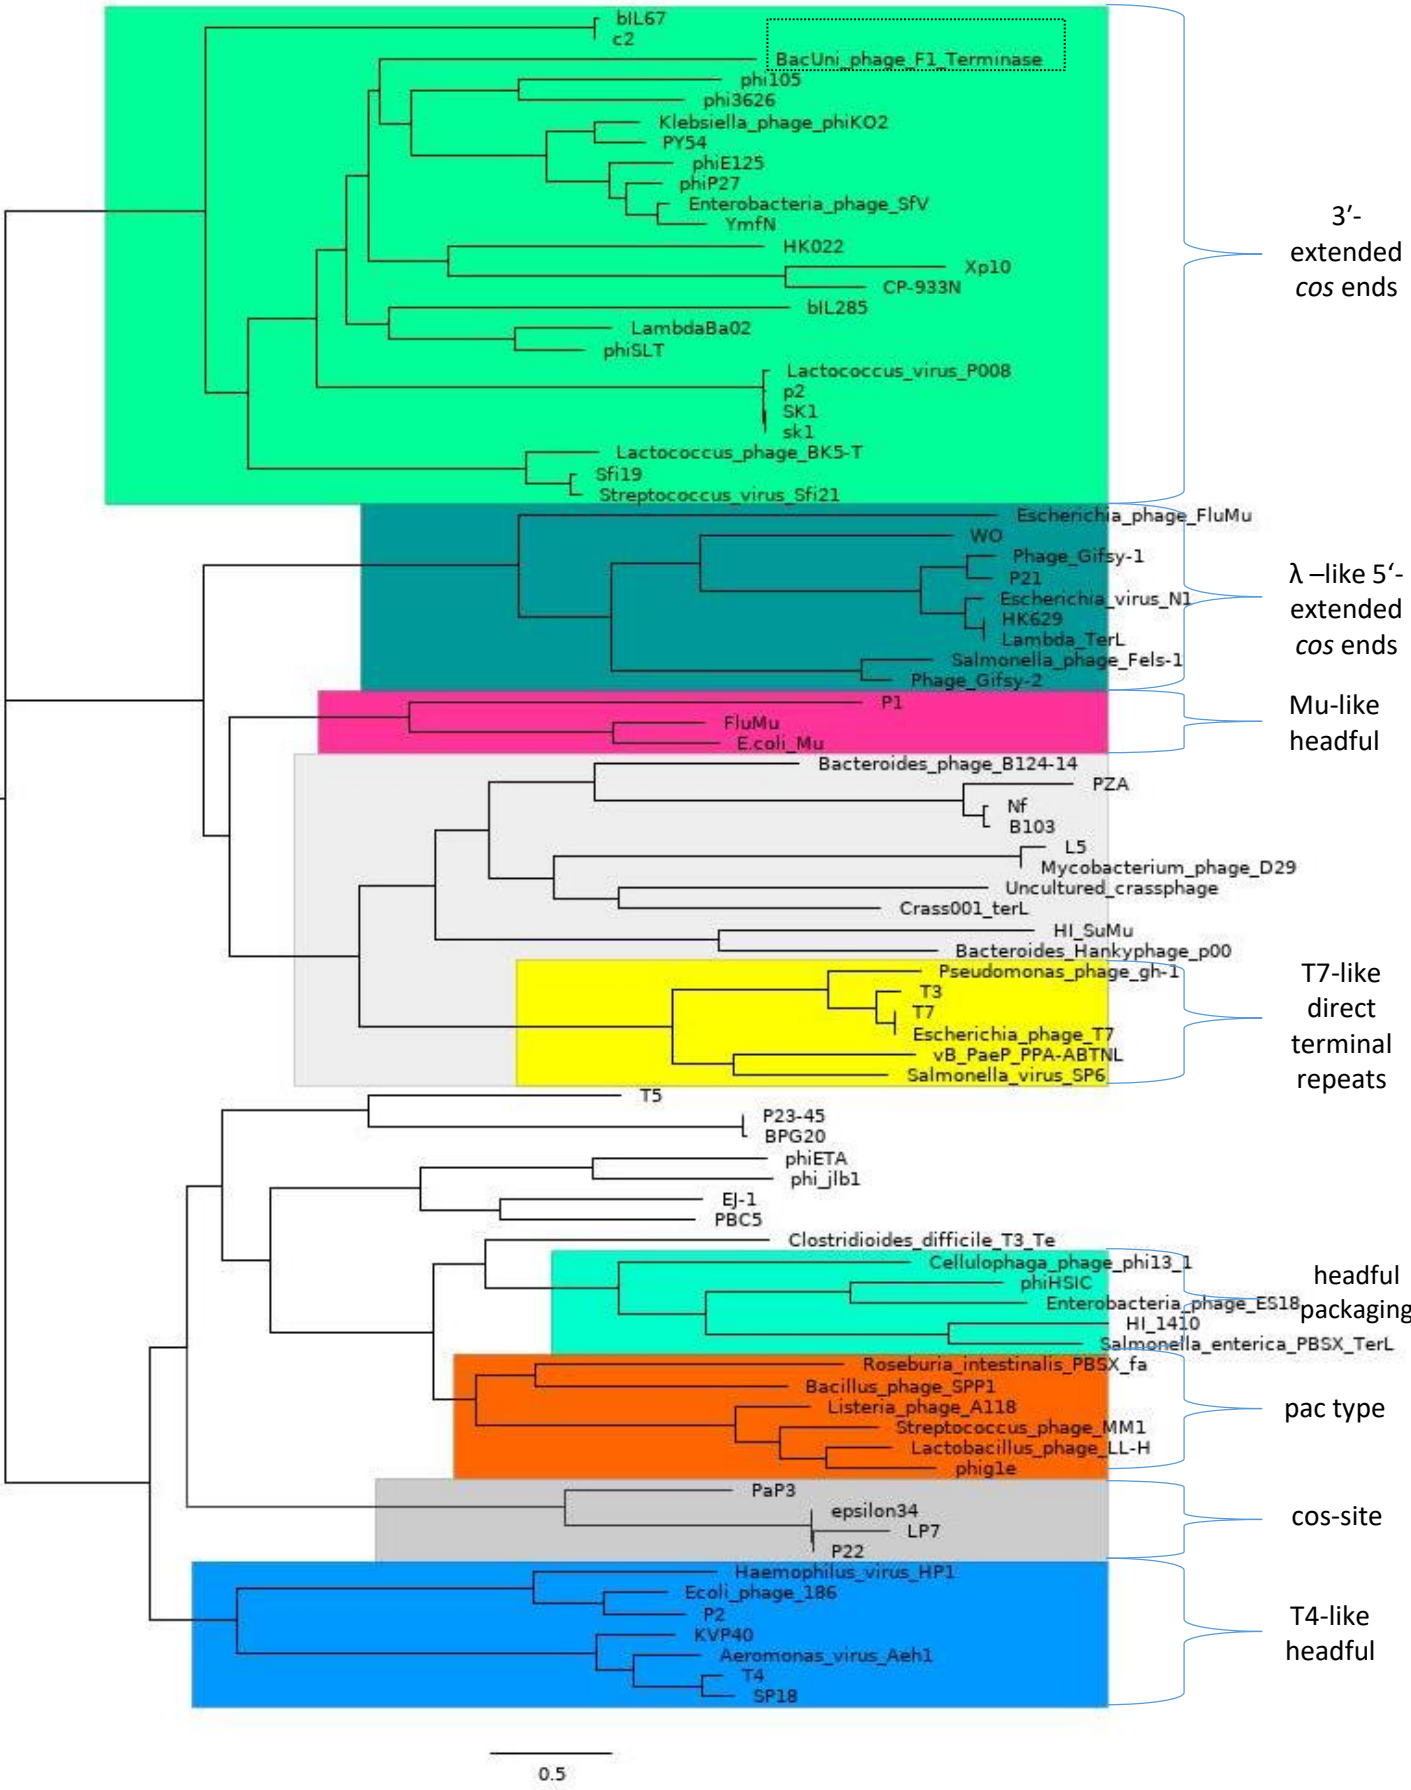

Supplement: s1 [file s1]
